# Supplementary material
Source: publisher figshare collection journal article supplement (https://acs.figshare.com/ndownloader/files/12071897)
Supplement: Supplementary file 1 [file 12071897]

 
data_complex_4
# data_v228a_sq
# structure solved and refined by Yael Diskin-Posner
# start Validation Reply Form
_vrf_PLAT094_complex_4
;
PROBLEM: Ratio of Maximum / Minimum Residual Density ....       4.01 Report
RESPONSE: Highest peak is 0.96A from Ru1
;
_vrf_PLAT910_complex_4
;
PROBLEM: Missing # of FCF Reflection(s) Below Theta(Min)          26 Note  
RESPONSE: The crystals grow in clusters. Data were collected 
from small pieces a few
times. It was difficult to separete a single 
diffracting crystal. Data were collected
from a small piece in Cu wavelength with a 
relatively long exposure time. 
;
_vrf_PLAT973_complex_4
;
PROBLEM: Check Calcd Positive Resid. Density on       Ru1       1.51 eA-3  
RESPONSE: see above
;
# end Validation Reply Form
 
_audit_creation_method            'SHELXL-2014/7'
_shelx_SHELXL_version_number      '2014/7'
_chemical_name_systematic         ?
_chemical_name_common             ?
_chemical_melting_point           ?
_chemical_formula_moiety          'C54 H45 N9 Ru, 2(F6 P)'
_chemical_formula_sum
 'C54 H45 F12 N9 P2 Ru' 
_chemical_formula_weight          1211.00

loop_
 _atom_type_symbol
 _atom_type_description
 _atom_type_scat_dispersion_real
 _atom_type_scat_dispersion_imag
 _atom_type_scat_source
 'C'  'C'   0.0181   0.0091
 'International Tables Vol C Tables 4.2.6.8 and 6.1.1.4'
 'H'  'H'   0.0000   0.0000
 'International Tables Vol C Tables 4.2.6.8 and 6.1.1.4'
 'N'  'N'   0.0311   0.0180
 'International Tables Vol C Tables 4.2.6.8 and 6.1.1.4'
 'F'  'F'   0.0727   0.0534
 'International Tables Vol C Tables 4.2.6.8 and 6.1.1.4'
 'P'  'P'   0.2955   0.4335
 'International Tables Vol C Tables 4.2.6.8 and 6.1.1.4'
 'Ru'  'Ru'   0.0552   3.2960
 'International Tables Vol C Tables 4.2.6.8 and 6.1.1.4'
 
_space_group_crystal_system       triclinic
_space_group_IT_number            2
_space_group_name_H-M_alt         'P -1'
_space_group_name_Hall            '-P 1'
 
_shelx_space_group_comment
;
The symmetry employed for this shelxl refinement is uniquely defined
by the following loop, which should always be used as a source of
symmetry information in preference to the above space-group names.
They are only intended as comments.
;
 
loop_
 _space_group_symop_operation_xyz
 'x, y, z'
 '-x, -y, -z'
 
_cell_length_a                    15.2905(2)
_cell_length_b                    21.2936(4)
_cell_length_c                    21.9394(5)
_cell_angle_alpha                 73.6996(19)
_cell_angle_beta                  77.0624(15)
_cell_angle_gamma                 79.2781(15)
_cell_volume                      6623.9(2)
_cell_formula_units_Z             4
_cell_measurement_temperature     100(2)
_cell_measurement_reflns_used     28256
_cell_measurement_theta_min       4.3120
_cell_measurement_theta_max       77.6570
 
_exptl_crystal_description        chunk
_exptl_crystal_colour             red
_exptl_crystal_density_meas       ?
_exptl_crystal_density_method     ?
_exptl_crystal_density_diffrn     1.214          
_exptl_crystal_F_000              2456
_exptl_transmission_factor_min    ?
_exptl_transmission_factor_max    ?
_exptl_crystal_size_max           0.300
_exptl_crystal_size_mid           0.100
_exptl_crystal_size_min           0.050
_exptl_absorpt_coefficient_mu     3.000
_shelx_estimated_absorpt_T_min    0.466
_shelx_estimated_absorpt_T_max    0.864
_exptl_absorpt_correction_type    multi-scan
_exptl_absorpt_correction_T_min   0.73191
_exptl_absorpt_correction_T_max   1.00000
_exptl_absorpt_process_details    
;
CrysAlisPro 1.171.39.4c (Rigaku Oxford Diffraction, 2015)
Empirical absorption correction using spherical harmonics,
 implemented in SCALE3 ABSPACK scaling algorithm.
;
_exptl_absorpt_special_details    ?
_diffrn_ambient_temperature       100(2)
_diffrn_radiation_wavelength      1.54184
_diffrn_radiation_type            CuK\a
_diffrn_source                    ?
_diffrn_measurement_device_type   'XtaLAB Pro: Kappa dual home/near'
_diffrn_measurement_method        '\w scans'
_diffrn_detector_area_resol_mean  ?
_diffrn_reflns_number             98357
_diffrn_reflns_av_unetI/netI      0.0507
_diffrn_reflns_av_R_equivalents   0.0623
_diffrn_reflns_limit_h_min        -18
_diffrn_reflns_limit_h_max        10
_diffrn_reflns_limit_k_min        -25
_diffrn_reflns_limit_k_max        23
_diffrn_reflns_limit_l_min        -26
_diffrn_reflns_limit_l_max        26
_diffrn_reflns_theta_min          5.647
_diffrn_reflns_theta_max          66.600
_diffrn_reflns_theta_full         66.600
_diffrn_measured_fraction_theta_max   0.997
_diffrn_measured_fraction_theta_full  0.997
_diffrn_reflns_Laue_measured_fraction_max    0.997
_diffrn_reflns_Laue_measured_fraction_full   0.997
_diffrn_reflns_point_group_measured_fraction_max   0.997
_diffrn_reflns_point_group_measured_fraction_full  0.997
_reflns_number_total              23322
_reflns_number_gt                 16141
_reflns_threshold_expression      'I > 2\s(I)'
_reflns_Friedel_coverage          0.000
_reflns_Friedel_fraction_max      .
_reflns_Friedel_fraction_full     .
 
_reflns_special_details
;
 Reflections were merged by SHELXL according to the crystal
 class for the calculation of statistics and refinement.
 
 Structure factors included contributions from the .fab file.
 
 _reflns_Friedel_fraction is defined as the number of unique
 Friedel pairs measured divided by the number that would be
 possible theoretically, ignoring centric projections and
 systematic absences.
;
 
_computing_data_collection        'CrysAlisPro 1.171.39.4c (Rigaku OD, 2015)'
_computing_cell_refinement        'CrysAlisPro 1.171.39.4c (Rigaku OD, 2015)'
_computing_data_reduction         'CrysAlisPro 1.171.39.4c (Rigaku OD, 2015)'
_computing_structure_solution     'SHELXT (Sheldrick, 2014)'
_computing_structure_refinement 'SHELXL-2014/7 (Sheldrick, 2014)'
_computing_molecular_graphics     ?
_computing_publication_material   ?
_refine_special_details           ?
_refine_ls_structure_factor_coef  Fsqd
_refine_ls_matrix_type            full
_refine_ls_weighting_scheme       calc
_refine_ls_weighting_details
'w=1/[\s^2^(Fo^2^)+(0.1651P)^2^+4.0842P] where P=(Fo^2^+2Fc^2^)/3'
_atom_sites_solution_primary      ?
_atom_sites_solution_secondary    ?
_atom_sites_solution_hydrogens    geom
_refine_ls_hydrogen_treatment     constr
_refine_ls_extinction_method      none
_refine_ls_extinction_coef        .
_refine_ls_number_reflns          23322
_refine_ls_number_parameters      1477
_refine_ls_number_restraints      36
_refine_ls_R_factor_all           0.1057
_refine_ls_R_factor_gt            0.0807
_refine_ls_wR_factor_ref          0.2551
_refine_ls_wR_factor_gt           0.2256
_refine_ls_goodness_of_fit_ref    1.024
_refine_ls_restrained_S_all       1.026
_refine_ls_shift/su_max           0.030
_refine_ls_shift/su_mean          0.000

# SQUEEZE RESULTS (Version = 240615)
# Note: Data are Listed for all Voids in the P1 Unit Cell
# i.e. Centre of Gravity, Solvent Accessible Volume,
# Recovered number of Electrons in the Void and
# Details about the Squeezed Material
loop_
  _platon_squeeze_void_nr                          
  _platon_squeeze_void_average_x                   
  _platon_squeeze_void_average_y                   
  _platon_squeeze_void_average_z                   
  _platon_squeeze_void_volume                      
  _platon_squeeze_void_count_electrons             
  _platon_squeeze_void_content                     
   1 -0.007 -0.000  0.500      1179       226 ' '
   2 -0.139  0.500  1.000       546       132 ' '
_platon_squeeze_void_probe_radius                  1.20
_platon_squeeze_details                           ?
 
loop_
 _atom_site_label
 _atom_site_type_symbol
 _atom_site_fract_x
 _atom_site_fract_y
 _atom_site_fract_z
 _atom_site_U_iso_or_equiv
 _atom_site_adp_type
 _atom_site_occupancy
 _atom_site_site_symmetry_order  
 _atom_site_calc_flag
 _atom_site_refinement_flags_posn
 _atom_site_refinement_flags_adp
 _atom_site_refinement_flags_occupancy
 _atom_site_disorder_assembly
 _atom_site_disorder_group
Ru1 Ru 0.70366(2) 0.61948(2) 0.60639(2) 0.05986(15) Uani 1 1 d . . . . .
N1 N 0.6719(3) 0.5666(2) 0.5507(2) 0.0588(10) Uani 1 1 d . . . . .
N2 N 0.6869(3) 0.6928(2) 0.5251(2) 0.0624(11) Uani 1 1 d . . . . .
N3 N 0.5764(3) 0.9827(3) 0.1306(3) 0.0790(14) Uani 1 1 d . . . . .
N4 N 0.7224(3) 0.6791(2) 0.66005(19) 0.0561(9) Uani 1 1 d . . . . .
N5 N 0.5736(3) 0.6506(2) 0.6432(2) 0.0624(10) Uani 1 1 d . . . . .
N6 N 0.0083(7) 0.8600(5) 0.8083(7) 0.185(6) Uani 1 1 d . . . . .
N7 N 0.8392(3) 0.5897(2) 0.5780(2) 0.0615(11) Uani 1 1 d . . . . .
N8 N 0.7264(3) 0.5382(2) 0.6804(2) 0.0571(10) Uani 1 1 d . . . . .
C1 C 0.6620(3) 0.5021(3) 0.5671(3) 0.0645(13) Uani 1 1 d . . . . .
H1 H 0.6706 0.4769 0.6090 0.077 Uiso 1 1 calc R U . . .
C2 C 0.6407(4) 0.4712(3) 0.5275(3) 0.0748(16) Uani 1 1 d . . . . .
H2 H 0.6346 0.4255 0.5415 0.090 Uiso 1 1 calc R U . . .
C3 C 0.6278(4) 0.5072(4) 0.4657(3) 0.0748(16) Uani 1 1 d . . . . .
C4 C 0.6348(4) 0.5736(3) 0.4484(3) 0.0689(14) Uani 1 1 d . . . . .
H4 H 0.6247 0.5995 0.4070 0.083 Uiso 1 1 calc R U . . .
C5 C 0.6564(3) 0.6025(3) 0.4909(3) 0.0639(14) Uani 1 1 d . . . . .
C6 C 0.6635(3) 0.6740(3) 0.4768(2) 0.0623(13) Uani 1 1 d . . . . .
C7 C 0.6458(4) 0.7214(3) 0.4203(3) 0.0758(17) Uani 1 1 d . . . . .
H7 H 0.6300 0.7082 0.3867 0.091 Uiso 1 1 calc R U . . .
C8 C 0.6514(4) 0.7868(3) 0.4135(3) 0.0782(16) Uani 1 1 d . . . . .
C9 C 0.6757(5) 0.8046(4) 0.4620(3) 0.0854(18) Uani 1 1 d . . . . .
H9 H 0.6802 0.8494 0.4586 0.103 Uiso 1 1 calc R U . . .
C10 C 0.6934(4) 0.7557(3) 0.5162(3) 0.0749(15) Uani 1 1 d . . . . .
H10 H 0.7115 0.7684 0.5493 0.090 Uiso 1 1 calc R U . . .
C11 C 0.6327(5) 0.8397(4) 0.3553(4) 0.0896(19) Uani 1 1 d . . . . .
H11 H 0.6383 0.8835 0.3549 0.108 Uiso 1 1 calc R U . . .
C12 C 0.6096(4) 0.8316(4) 0.3058(4) 0.0884(19) Uani 1 1 d . . . . .
H12 H 0.6017 0.7882 0.3063 0.106 Uiso 1 1 calc R U . . .
C13 C 0.5942(4) 0.8857(3) 0.2466(3) 0.0762(16) Uani 1 1 d . . . . .
C14 C 0.5791(4) 0.8700(3) 0.1944(3) 0.0739(15) Uani 1 1 d . . . . .
H14 H 0.5744 0.8256 0.1964 0.089 Uiso 1 1 calc R U . . .
C15 C 0.5707(4) 0.9182(3) 0.1386(3) 0.0753(16) Uani 1 1 d . . . . .
H15 H 0.5601 0.9053 0.1031 0.090 Uiso 1 1 calc R U . . .
C16 C 0.5902(5) 0.9986(4) 0.1822(4) 0.094(2) Uani 1 1 d . . . . .
H16 H 0.5937 1.0435 0.1791 0.113 Uiso 1 1 calc R U . . .
C17 C 0.5997(5) 0.9519(4) 0.2407(4) 0.095(2) Uani 1 1 d . . . . .
H17 H 0.6099 0.9653 0.2761 0.114 Uiso 1 1 calc R U . . .
C18 C 0.6074(5) 0.4734(4) 0.4194(4) 0.102(2) Uani 1 1 d . . . . .
H18A H 0.5583 0.5005 0.3981 0.152 Uiso 1 1 calc R U . . .
H18B H 0.5890 0.4302 0.4432 0.152 Uiso 1 1 calc R U . . .
H18C H 0.6616 0.4675 0.3868 0.152 Uiso 1 1 calc R U . . .
C19 C 0.8023(3) 0.6910(3) 0.6673(3) 0.0670(14) Uani 1 1 d . . . . .
H19 H 0.8564 0.6692 0.6472 0.080 Uiso 1 1 calc R U . . .
C20 C 0.8089(4) 0.7334(3) 0.7025(3) 0.0716(15) Uani 1 1 d . . . . .
H20 H 0.8668 0.7410 0.7055 0.086 Uiso 1 1 calc R U . . .
C21 C 0.7317(4) 0.7651(3) 0.7337(3) 0.0713(14) Uani 1 1 d . . . . .
C22 C 0.6489(4) 0.7517(3) 0.7278(3) 0.0647(13) Uani 1 1 d . . . . .
H22 H 0.5943 0.7712 0.7496 0.078 Uiso 1 1 calc R U . . .
C23 C 0.6454(3) 0.7101(3) 0.6904(2) 0.0591(12) Uani 1 1 d . . . . .
C24 C 0.5613(3) 0.6954(3) 0.6791(2) 0.0594(12) Uani 1 1 d . . . . .
C25 C 0.4755(3) 0.7239(3) 0.7028(3) 0.0675(14) Uani 1 1 d . . . . .
H25 H 0.4690 0.7526 0.7302 0.081 Uiso 1 1 calc R U . . .
C26 C 0.3996(4) 0.7105(3) 0.6867(3) 0.0714(15) Uani 1 1 d . . . . .
C27 C 0.4130(4) 0.6656(4) 0.6493(3) 0.0821(18) Uani 1 1 d . . . . .
H27 H 0.3626 0.6545 0.6377 0.099 Uiso 1 1 calc R U . . .
C28 C 0.4976(3) 0.6375(3) 0.6294(3) 0.0752(16) Uani 1 1 d . . . . .
H28 H 0.5044 0.6067 0.6041 0.090 Uiso 1 1 calc R U . . .
C29 C 0.3068(4) 0.7391(4) 0.7083(4) 0.0860(18) Uani 1 1 d . . . . .
H29 H 0.2607 0.7288 0.6914 0.103 Uiso 1 1 calc R U . . .
C30 C 0.2818(5) 0.7755(4) 0.7464(4) 0.093(2) Uani 1 1 d . . . . .
H30 H 0.3277 0.7866 0.7630 0.112 Uiso 1 1 calc R U . . .
C31 C 0.1861(5) 0.8035(4) 0.7685(5) 0.108(3) Uani 1 1 d . . . . .
C32 C 0.1171(6) 0.7944(5) 0.7457(6) 0.128(3) Uani 1 1 d . . . . .
H32 H 0.1267 0.7693 0.7146 0.154 Uiso 1 1 calc R U . . .
C33 C 0.0282(7) 0.8232(7) 0.7691(9) 0.187(7) Uani 1 1 d . . . . .
H33 H -0.0204 0.8140 0.7540 0.225 Uiso 1 1 calc R U . . .
C34 C 0.0813(8) 0.8678(5) 0.8293(7) 0.169(6) Uani 1 1 d . . . . .
H34 H 0.0712 0.8944 0.8591 0.203 Uiso 1 1 calc R U . . .
C35 C 0.1687(6) 0.8405(4) 0.8114(5) 0.125(3) Uani 1 1 d . . . . .
H35 H 0.2162 0.8477 0.8291 0.149 Uiso 1 1 calc R U . . .
C36 C 0.7376(4) 0.8128(3) 0.7721(3) 0.0826(17) Uani 1 1 d . . . . .
H36A H 0.7487 0.8557 0.7425 0.124 Uiso 1 1 calc R U . . .
H36B H 0.7874 0.7955 0.7961 0.124 Uiso 1 1 calc R U . . .
H36C H 0.6806 0.8180 0.8023 0.124 Uiso 1 1 calc R U . . .
C37 C 0.8942(4) 0.6205(3) 0.5258(3) 0.0703(15) Uani 1 1 d . . . . .
H37 H 0.8691 0.6585 0.4973 0.084 Uiso 1 1 calc R U . . .
C38 C 0.9846(4) 0.5995(3) 0.5120(3) 0.0740(16) Uani 1 1 d . . . . .
H38 H 1.0205 0.6229 0.4742 0.089 Uiso 1 1 calc R U . . .
C39 C 1.0246(4) 0.5450(3) 0.5520(3) 0.0746(16) Uani 1 1 d . . . . .
C40 C 0.9677(3) 0.5127(3) 0.6061(3) 0.0675(14) Uani 1 1 d . . . . .
H40 H 0.9923 0.4747 0.6350 0.081 Uiso 1 1 calc R U . . .
C41 C 0.8768(3) 0.5348(3) 0.6184(3) 0.0643(14) Uani 1 1 d . . . . .
C42 C 0.8121(3) 0.5039(3) 0.6755(3) 0.0653(14) Uani 1 1 d . . . . .
C43 C 0.8327(5) 0.4468(3) 0.7195(3) 0.0813(17) Uani 1 1 d . . . . .
H43 H 0.8933 0.4255 0.7163 0.098 Uiso 1 1 calc R U . . .
C44 C 0.7655(5) 0.4188(4) 0.7698(3) 0.0889(19) Uani 1 1 d . . . . .
C45 C 0.6789(5) 0.4544(4) 0.7748(3) 0.0827(17) Uani 1 1 d . . . . .
H45 H 0.6318 0.4386 0.8090 0.099 Uiso 1 1 calc R U . . .
C46 C 0.6630(4) 0.5118(3) 0.7302(3) 0.0687(14) Uani 1 1 d . . . . .
H46 H 0.6034 0.5350 0.7341 0.082 Uiso 1 1 calc R U . . .
C47 C 0.7735(7) 0.3559(7) 0.8233(6) 0.092(4) Uani 0.75(2) 1 d . . P A 1
H47 H 0.7227 0.3450 0.8563 0.110 Uiso 0.75(2) 1 calc R U P A 1
C48 C 0.8476(6) 0.3182(7) 0.8238(5) 0.081(3) Uani 0.75(2) 1 d . . P A 1
H48 H 0.8971 0.3296 0.7899 0.097 Uiso 0.75(2) 1 calc R U P A 1
C49 C 0.8608(9) 0.2562(6) 0.8758(5) 0.085(3) Uani 0.75(2) 1 d . . P A 1
C50 C 0.9375(9) 0.2146(7) 0.8722(5) 0.087(3) Uani 0.75(2) 1 d . . P A 1
H50 H 0.9848 0.2246 0.8361 0.104 Uiso 0.75(2) 1 calc R U P A 1
C51 C 0.9501(9) 0.1561(9) 0.9211(7) 0.094(4) Uani 0.75(2) 1 d . . P A 1
H51 H 1.0057 0.1279 0.9157 0.112 Uiso 0.75(2) 1 calc R U P A 1
C52 C 0.7956(8) 0.2401(7) 0.9285(9) 0.093(3) Uani 0.75(2) 1 d . . P A 1
H52 H 0.7393 0.2677 0.9331 0.112 Uiso 0.75(2) 1 calc R U P A 1
C53 C 0.8124(10) 0.1825(10) 0.9760(8) 0.110(6) Uani 0.75(2) 1 d . . P A 1
H53 H 0.7666 0.1732 1.0133 0.132 Uiso 0.75(2) 1 calc R U P A 1
N9 N 0.8900(12) 0.1379(9) 0.9732(9) 0.114(7) Uani 0.75(2) 1 d . . P A 1
C47A C 0.7815(16) 0.3109(13) 0.8585(13) 0.065(8) Uiso 0.25(2) 1 d . . P A 2
H47A H 0.7173 0.3192 0.8684 0.078 Uiso 0.25(2) 1 calc R U P A 2
C48A C 0.827(2) 0.3585(15) 0.8041(14) 0.067(8) Uiso 0.25(2) 1 d . . P A 2
H48A H 0.8903 0.3528 0.7904 0.080 Uiso 0.25(2) 1 calc R U P A 2
C49A C 0.9476(15) 0.1764(14) 0.9175(16) 0.062(10) Uiso 0.25(2) 1 d G . P A 2
H49A H 1.0091 0.1591 0.9058 0.074 Uiso 0.25(2) 1 calc R U P A 2
C50A C 0.910(2) 0.2330(14) 0.8775(13) 0.081(13) Uiso 0.25(2) 1 d G . P A 2
H50A H 0.9454 0.2543 0.8384 0.097 Uiso 0.25(2) 1 calc R U P A 2
C51A C 0.820(2) 0.2584(10) 0.8947(12) 0.081(11) Uiso 0.25(2) 1 d G . P A 2
C52A C 0.7677(17) 0.2271(11) 0.9518(13) 0.065(8) Uiso 0.25(2) 1 d G . P A 2
H52A H 0.7062 0.2445 0.9636 0.078 Uiso 0.25(2) 1 calc R U P A 2
C53A C 0.8055(18) 0.1706(12) 0.9919(12) 0.067(10) Uiso 0.25(2) 1 d G . P A 2
H53A H 0.7699 0.1492 1.0310 0.081 Uiso 0.25(2) 1 calc R U P A 2
N9A N 0.8955(18) 0.1452(12) 0.9747(15) 0.057(8) Uiso 0.25(2) 1 d G . P A 2
C54 C 1.1239(4) 0.5233(4) 0.5384(4) 0.088(2) Uani 1 1 d . . . . .
H54A H 1.1539 0.5388 0.5654 0.133 Uiso 1 1 calc R U . . .
H54B H 1.1480 0.5418 0.4927 0.133 Uiso 1 1 calc R U . . .
H54C H 1.1352 0.4750 0.5480 0.133 Uiso 1 1 calc R U . . .
Ru2 Ru 0.76069(3) 0.77756(2) 1.00075(2) 0.06844(16) Uani 1 1 d . . . . .
N10 N 0.7694(3) 0.7045(3) 1.0845(2) 0.0713(12) Uani 1 1 d . . . . .
N11 N 0.7831(3) 0.8300(2) 1.0601(2) 0.0655(11) Uani 1 1 d . . . . .
N13 N 0.7481(3) 0.7178(2) 0.9451(2) 0.0683(11) Uani 1 1 d . . . . .
N14 N 0.8930(3) 0.7473(2) 0.9672(2) 0.0702(12) Uani 1 1 d . . . . .
N15 N 1.4657(4) 0.5487(3) 0.8015(3) 0.0924(17) Uani 1 1 d . . . . .
N16 N 0.7421(3) 0.8574(2) 0.9249(2) 0.0646(11) Uani 1 1 d . . . . .
N17 N 0.6246(3) 0.8074(2) 1.0249(2) 0.0667(11) Uani 1 1 d . . . . .
C55 C 0.6707(4) 0.7044(3) 0.9363(3) 0.0764(16) Uani 1 1 d . . . . .
H55 H 0.6152 0.7248 0.9562 0.092 Uiso 1 1 calc R U . . .
C56 C 0.6679(5) 0.6622(3) 0.8996(3) 0.0865(19) Uani 1 1 d . . . . .
H56 H 0.6111 0.6542 0.8946 0.104 Uiso 1 1 calc R U . . .
C57 C 0.7475(4) 0.6313(3) 0.8698(3) 0.0771(16) Uani 1 1 d . . . . .
C58 C 0.8271(4) 0.6456(3) 0.8783(3) 0.0757(16) Uani 1 1 d . . . . .
H58 H 0.8831 0.6262 0.8581 0.091 Uiso 1 1 calc R U . . .
C59 C 0.8272(4) 0.6879(3) 0.9159(3) 0.0666(14) Uani 1 1 d . . . . .
C60 C 0.9093(4) 0.7043(3) 0.9291(3) 0.0687(14) Uani 1 1 d . . . . .
C61 C 0.9962(4) 0.6785(3) 0.9058(3) 0.0747(15) Uani 1 1 d . . . . .
H61 H 1.0053 0.6483 0.8796 0.090 Uiso 1 1 calc R U . . .
C62 C 1.0709(4) 0.6967(3) 0.9206(3) 0.0808(17) Uani 1 1 d . . . . .
C63 C 1.0527(4) 0.7402(4) 0.9604(4) 0.0857(19) Uani 1 1 d . . . . .
H63 H 1.1011 0.7532 0.9726 0.103 Uiso 1 1 calc R U . . .
C64 C 0.9668(4) 0.7636(3) 0.9813(3) 0.0836(18) Uani 1 1 d . . . . .
H64 H 0.9567 0.7936 1.0078 0.100 Uiso 1 1 calc R U . . .
C65 C 1.1657(4) 0.6719(3) 0.8990(4) 0.0847(18) Uani 1 1 d . . . . .
H65 H 1.2109 0.6853 0.9143 0.102 Uiso 1 1 calc R U . . .
C66 C 1.1920(4) 0.6333(3) 0.8606(3) 0.0828(17) Uani 1 1 d . . . . .
H66 H 1.1469 0.6206 0.8446 0.099 Uiso 1 1 calc R U . . .
C67 C 1.2887(4) 0.6069(3) 0.8395(3) 0.0799(16) Uani 1 1 d . . . . .
C68 C 1.3067(4) 0.5661(3) 0.7985(4) 0.0871(19) Uani 1 1 d . . . . .
H68 H 1.2594 0.5573 0.7817 0.104 Uiso 1 1 calc R U . . .
C69 C 1.3941(5) 0.5381(4) 0.7820(4) 0.098(2) Uani 1 1 d . . . . .
H69 H 1.4046 0.5090 0.7546 0.118 Uiso 1 1 calc R U . . .
C70 C 1.3592(5) 0.6187(4) 0.8612(4) 0.0899(19) Uani 1 1 d . . . . .
H70 H 1.3495 0.6464 0.8899 0.108 Uiso 1 1 calc R U . . .
C71 C 1.4472(5) 0.5889(4) 0.8401(4) 0.095(2) Uani 1 1 d . . . . .
H71 H 1.4961 0.5985 0.8546 0.114 Uiso 1 1 calc R U . . .
C72 C 0.7444(5) 0.5848(4) 0.8306(4) 0.095(2) Uani 1 1 d . . . . .
H72A H 0.8050 0.5749 0.8060 0.142 Uiso 1 1 calc R U . . .
H72B H 0.7022 0.6051 0.8008 0.142 Uiso 1 1 calc R U . . .
H72C H 0.7242 0.5438 0.8595 0.142 Uiso 1 1 calc R U . . .
C73 C 0.7628(4) 0.6407(3) 1.0931(4) 0.0849(18) Uani 1 1 d . . . . .
H73 H 0.7567 0.6260 1.0573 0.102 Uiso 1 1 calc R U . . .
C74 C 0.7644(5) 0.5954(4) 1.1517(4) 0.093(2) Uani 1 1 d . . . . .
H74 H 0.7593 0.5505 1.1559 0.112 Uiso 1 1 calc R U . . .
C75 C 0.7737(5) 0.6157(4) 1.2051(4) 0.093(2) Uani 1 1 d . . . . .
C76 C 0.7834(4) 0.6816(4) 1.1954(3) 0.0850(18) Uani 1 1 d . . . . .
H76 H 0.7912 0.6971 1.2303 0.102 Uiso 1 1 calc R U . . .
C77 C 0.7817(4) 0.7246(3) 1.1355(3) 0.0707(15) Uani 1 1 d . . . . .
C78 C 0.7914(3) 0.7944(3) 1.1213(3) 0.0687(14) Uani 1 1 d . . . . .
C79 C 0.8057(4) 0.8244(4) 1.1667(3) 0.0783(17) Uani 1 1 d . . . . .
H79 H 0.8108 0.7986 1.2091 0.094 Uiso 1 1 calc R U . . .
C80 C 0.8126(4) 0.8908(4) 1.1506(3) 0.0813(17) Uani 1 1 d . . . . .
C81 C 0.8040(4) 0.9263(4) 1.0884(3) 0.0802(17) Uani 1 1 d . . . . .
H81 H 0.8070 0.9724 1.0755 0.096 Uiso 1 1 calc R U . . .
C82 C 0.7909(4) 0.8935(3) 1.0450(3) 0.0732(16) Uani 1 1 d . . . . .
H82 H 0.7874 0.9183 1.0020 0.088 Uiso 1 1 calc R U . . .
C83 C 0.8248(5) 0.9245(4) 1.1978(4) 0.098(2) Uani 1 1 d . . . . .
H83 H 0.8269 0.9707 1.1829 0.117 Uiso 1 1 calc R U . . .
C84 C 0.8331(5) 0.8977(4) 1.2578(3) 0.095(2) Uani 1 1 d . . . . .
H84 H 0.8309 0.8515 1.2728 0.113 Uiso 1 1 calc R U . . .
C85 C 0.8454(8) 0.9312(5) 1.3045(4) 0.131(3) Uani 1 1 d . U . . .
C86 C 0.8605(9) 0.8980(5) 1.3634(4) 0.146(4) Uani 1 1 d . U . . .
H86 H 0.8658 0.8512 1.3748 0.175 Uiso 1 1 calc R U . . .
C87 C 0.8687(12) 0.9297(6) 1.4080(5) 0.186(4) Uani 1 1 d . U . . .
H87 H 0.8746 0.9041 1.4503 0.223 Uiso 1 1 calc R U . . .
C88 C 0.8470(14) 1.0251(7) 1.3407(6) 0.225(5) Uani 1 1 d . U . . .
H88 H 0.8397 1.0719 1.3317 0.270 Uiso 1 1 calc R U . . .
C89 C 0.8333(11) 0.9968(6) 1.2935(5) 0.183(4) Uani 1 1 d . U . . .
H89 H 0.8158 1.0239 1.2546 0.219 Uiso 1 1 calc R U . . .
N12 N 0.8687(11) 0.9922(5) 1.3952(5) 0.217(4) Uani 1 1 d . U . . .
C90 C 0.7708(8) 0.5681(5) 1.2715(4) 0.132(3) Uani 1 1 d . . . . .
H90A H 0.8296 0.5622 1.2847 0.198 Uiso 1 1 calc R U . . .
H90B H 0.7575 0.5253 1.2699 0.198 Uiso 1 1 calc R U . . .
H90C H 0.7236 0.5859 1.3028 0.198 Uiso 1 1 calc R U . . .
C91 C 0.5667(4) 0.7800(3) 1.0769(3) 0.0743(15) Uani 1 1 d . . . . .
H91 H 0.5885 0.7410 1.1059 0.089 Uiso 1 1 calc R U . . .
C92 C 0.4774(4) 0.8055(3) 1.0903(3) 0.0755(16) Uani 1 1 d . . . . .
H92 H 0.4391 0.7842 1.1280 0.091 Uiso 1 1 calc R U . . .
C93 C 0.4424(4) 0.8625(3) 1.0491(3) 0.0709(15) Uani 1 1 d . . . . .
C94 C 0.5014(3) 0.8899(3) 0.9937(3) 0.0674(14) Uani 1 1 d . . . . .
H94 H 0.4797 0.9277 0.9633 0.081 Uiso 1 1 calc R U . . .
C95 C 0.5903(3) 0.8630(3) 0.9825(3) 0.0640(13) Uani 1 1 d . . . . .
C96 C 0.6567(3) 0.8898(3) 0.9262(3) 0.0616(13) Uani 1 1 d . . . . .
C97 C 0.6364(4) 0.9443(3) 0.8772(3) 0.0687(14) Uani 1 1 d . . . . .
H97 H 0.5762 0.9664 0.8794 0.082 Uiso 1 1 calc R U . . .
C98 C 0.7021(4) 0.9671(3) 0.8251(3) 0.0746(15) Uani 1 1 d . . . . .
C99 C 0.7873(4) 0.9337(3) 0.8265(3) 0.0772(16) Uani 1 1 d . . . . .
H99 H 0.8346 0.9480 0.7917 0.093 Uiso 1 1 calc R U . . .
C100 C 0.8075(4) 0.8814(3) 0.8749(3) 0.0702(15) Uani 1 1 d . . . . .
H100 H 0.8684 0.8610 0.8741 0.084 Uiso 1 1 calc R U . . .
C101 C 0.3448(11) 0.8972(9) 1.0624(9) 0.080(6) Uani 0.672(6) 1 d . . P B 3
H101 H 0.3237 0.9320 1.0290 0.096 Uiso 0.672(6) 1 calc R U P B 3
C102 C 0.2931(7) 0.8819(5) 1.1140(6) 0.086(3) Uani 0.672(6) 1 d . . P B 3
H102 H 0.3132 0.8468 1.1475 0.103 Uiso 0.672(6) 1 calc R U P B 3
C103 C 0.1998(6) 0.9170(6) 1.1254(7) 0.102(4) Uani 0.672(6) 1 d . . P B 3
C104 C 0.1593(8) 0.9657(5) 1.0732(6) 0.089(3) Uani 0.672(6) 1 d . . P B 3
H104 H 0.1918 0.9748 1.0300 0.107 Uiso 0.672(6) 1 calc R U P B 3
C105 C 0.0794(9) 0.9952(6) 1.0873(9) 0.120(5) Uani 0.672(6) 1 d . . P B 3
H105 H 0.0563 1.0285 1.0536 0.144 Uiso 0.672(6) 1 calc R U P B 3
C106 C 0.0598(8) 0.9389(7) 1.1925(8) 0.112(4) Uani 0.672(6) 1 d . . P B 3
H106 H 0.0207 0.9294 1.2333 0.135 Uiso 0.672(6) 1 calc R U P B 3
C107 C 0.1484(7) 0.9047(5) 1.1875(6) 0.085(3) Uani 0.672(6) 1 d . . P B 3
H107 H 0.1712 0.8756 1.2236 0.101 Uiso 0.672(6) 1 calc R U P B 3
N18 N 0.0268(8) 0.9838(6) 1.1438(9) 0.134(4) Uani 0.672(6) 1 d . . P B 3
C108 C 0.6760(10) 1.0246(7) 0.7764(7) 0.073(4) Uani 0.672(6) 1 d . . P B 3
H10A H 0.7303 1.0402 0.7469 0.110 Uiso 0.672(6) 1 calc R U P B 3
H10B H 0.6428 1.0594 0.7971 0.110 Uiso 0.672(6) 1 calc R U P B 3
H10C H 0.6372 1.0132 0.7522 0.110 Uiso 0.672(6) 1 calc R U P B 3
C201 C 0.687(3) 1.0217(17) 0.7585(16) 0.073(9) Uiso 0.328(6) 1 d . . P B 4
H201 H 0.6267 1.0435 0.7584 0.088 Uiso 0.328(6) 1 calc R U P B 4
C202 C 0.7313(12) 1.0362(8) 0.7168(9) 0.067(4) Uiso 0.328(6) 1 d . . P B 4
H202 H 0.7906 1.0126 0.7122 0.080 Uiso 0.328(6) 1 calc R U P B 4
C203 C 0.7074(10) 1.0933(6) 0.6622(6) 0.080(5) Uiso 0.328(6) 1 d G . P B 4
C204 C 0.6393(9) 1.1448(7) 0.6714(6) 0.091(6) Uiso 0.328(6) 1 d G . P B 4
H204 H 0.6052 1.1445 0.7134 0.109 Uiso 0.328(6) 1 calc R U P B 4
C205 C 0.6211(10) 1.1968(6) 0.6191(8) 0.097(6) Uiso 0.328(6) 1 d G . P B 4
H205 H 0.5746 1.2320 0.6254 0.116 Uiso 0.328(6) 1 calc R U P B 4
N18A N 0.6710(12) 1.1972(8) 0.5577(7) 0.141(9) Uiso 0.328(6) 1 d G . P B 4
C207 C 0.7390(12) 1.1457(10) 0.5486(6) 0.157(12) Uiso 0.328(6) 1 d G . P B 4
H207 H 0.7731 1.1460 0.5066 0.188 Uiso 0.328(6) 1 calc R U P B 4
C206 C 0.7572(10) 1.0938(8) 0.6008(8) 0.121(9) Uiso 0.328(6) 1 d G . P B 4
H206 H 0.8037 1.0586 0.5946 0.145 Uiso 0.328(6) 1 calc R U P B 4
C208 C 0.360(3) 0.8904(18) 1.0562(19) 0.071(11) Uiso 0.328(6) 1 d . . P B 4
H20A H 0.3230 0.8616 1.0910 0.106 Uiso 0.328(6) 1 calc R U P B 4
H20B H 0.3378 0.8985 1.0159 0.106 Uiso 0.328(6) 1 calc R U P B 4
H20C H 0.3576 0.9324 1.0670 0.106 Uiso 0.328(6) 1 calc R U P B 4
P1 P 1.05198(16) 0.61208(17) 0.71577(15) 0.1400(11) Uani 1 1 d . . . . .
F6 F 1.0985(5) 0.5629(4) 0.6751(4) 0.199(4) Uani 1 1 d . . . . .
F1 F 1.1434(4) 0.6421(4) 0.6999(4) 0.181(3) Uani 1 1 d . . . . .
F2 F 1.0814(5) 0.5647(4) 0.7799(4) 0.175(3) Uani 1 1 d . . . . .
F3 F 1.0069(3) 0.6652(3) 0.7543(3) 0.141(2) Uani 1 1 d . . . . .
F4 F 0.9584(4) 0.5845(3) 0.7324(4) 0.158(2) Uani 1 1 d . . . . .
F5 F 1.0207(3) 0.6621(4) 0.6514(3) 0.160(2) Uani 1 1 d . . . . .
P2 P 0.92466(11) 0.69508(11) 1.33390(8) 0.0867(5) Uani 1 1 d . . . . .
F7 F 0.9723(3) 0.7565(3) 1.2874(2) 0.1120(14) Uani 1 1 d . . . . .
F8 F 0.9455(2) 0.6606(3) 1.27532(18) 0.1057(14) Uani 1 1 d . . . . .
F9 F 0.8293(2) 0.7298(2) 1.31436(17) 0.0986(12) Uani 1 1 d . . . . .
F10 F 0.8774(3) 0.6343(2) 1.37961(18) 0.0967(11) Uani 1 1 d . . . . .
F11 F 0.9048(3) 0.7302(2) 1.39154(17) 0.0971(11) Uani 1 1 d . . . . .
F12 F 1.0196(3) 0.6600(2) 1.3536(2) 0.1015(12) Uani 1 1 d . . . . .
P3 P 0.48484(15) 0.66503(11) 1.27452(11) 0.0982(6) Uani 1 1 d . . . . .
F13 F 0.5654(6) 0.6984(5) 1.2247(6) 0.170(5) Uani 0.741(15) 1 d . . P C 9
F14 F 0.5197(10) 0.6695(4) 1.3324(6) 0.175(6) Uani 0.741(15) 1 d . . P C 9
F16 F 0.3936(7) 0.6403(5) 1.3135(6) 0.184(5) Uani 0.741(15) 1 d . . P C 9
F18 F 0.4558(15) 0.6626(7) 1.2096(6) 0.235(8) Uani 0.741(15) 1 d . . P C 9
F13A F 0.5533(18) 0.6568(16) 1.2108(13) 0.131(9) Uiso 0.259(15) 1 d . . P C 10
F14A F 0.5779(18) 0.6774(14) 1.2876(17) 0.137(9) Uiso 0.259(15) 1 d . . P C 10
F16A F 0.4310(19) 0.6578(11) 1.3423(12) 0.129(9) Uiso 0.259(15) 1 d . . P C 10
F18A F 0.4091(12) 0.6648(9) 1.2379(10) 0.086(6) Uiso 0.259(15) 1 d . . P C 10
F15 F 0.4398(4) 0.7398(3) 1.2634(3) 0.152(2) Uani 1 1 d . . . . .
F17 F 0.5229(7) 0.5931(3) 1.2845(4) 0.213(4) Uani 1 1 d . . . . .
P4 P 0.42817(10) 0.79485(9) 0.88518(9) 0.0774(4) Uani 1 1 d . . . . .
F19 F 0.5218(2) 0.8240(2) 0.8704(2) 0.0960(12) Uani 1 1 d . . . . .
F20 F 0.4785(2) 0.7345(2) 0.8554(2) 0.0956(11) Uani 1 1 d . . . . .
F21 F 0.4103(3) 0.8350(2) 0.8149(2) 0.1023(12) Uani 1 1 d . . . . .
F22 F 0.3353(2) 0.76556(19) 0.9001(2) 0.0904(11) Uani 1 1 d . . . . .
F23 F 0.3777(2) 0.8550(2) 0.91420(19) 0.0908(11) Uani 1 1 d . . . . .
F24 F 0.4484(3) 0.7539(2) 0.9546(2) 0.0991(11) Uani 1 1 d . . . . .
 
loop_
 _atom_site_aniso_label
 _atom_site_aniso_U_11
 _atom_site_aniso_U_22
 _atom_site_aniso_U_33
 _atom_site_aniso_U_23
 _atom_site_aniso_U_13
 _atom_site_aniso_U_12
Ru1 0.0452(2) 0.0881(3) 0.0602(2) -0.0389(2) -0.01666(16) -0.00288(17)
N1 0.044(2) 0.085(3) 0.056(2) -0.031(2) -0.0122(17) -0.0046(19)
N2 0.048(2) 0.087(3) 0.064(3) -0.035(2) -0.0142(18) -0.009(2)
N3 0.079(3) 0.077(3) 0.093(4) -0.033(3) -0.039(3) 0.007(2)
N4 0.048(2) 0.077(3) 0.050(2) -0.024(2) -0.0134(17) -0.0062(18)
N5 0.049(2) 0.085(3) 0.067(3) -0.035(2) -0.0190(19) -0.0059(19)
N6 0.082(6) 0.141(8) 0.273(14) -0.040(8) 0.035(7) 0.026(5)
N7 0.051(2) 0.092(3) 0.056(2) -0.037(2) -0.0170(19) -0.010(2)
N8 0.046(2) 0.080(3) 0.057(2) -0.030(2) -0.0140(17) -0.0104(18)
C1 0.057(3) 0.086(4) 0.062(3) -0.031(3) -0.017(2) -0.008(3)
C2 0.054(3) 0.103(4) 0.084(4) -0.049(4) -0.012(3) -0.011(3)
C3 0.057(3) 0.111(5) 0.078(4) -0.051(4) -0.019(3) -0.011(3)
C4 0.057(3) 0.099(4) 0.066(3) -0.040(3) -0.020(2) -0.008(3)
C5 0.040(2) 0.101(4) 0.061(3) -0.038(3) -0.014(2) 0.000(2)
C6 0.047(2) 0.092(4) 0.057(3) -0.030(3) -0.015(2) -0.006(2)
C7 0.053(3) 0.119(5) 0.069(3) -0.044(3) -0.022(2) 0.000(3)
C8 0.063(3) 0.080(4) 0.094(4) -0.023(3) -0.023(3) -0.006(3)
C9 0.088(4) 0.093(5) 0.087(4) -0.027(4) -0.031(4) -0.016(3)
C10 0.075(4) 0.089(4) 0.072(4) -0.031(3) -0.023(3) -0.009(3)
C11 0.088(4) 0.099(5) 0.101(5) -0.048(4) -0.030(4) -0.008(4)
C12 0.077(4) 0.104(5) 0.099(5) -0.047(4) -0.026(3) -0.002(3)
C13 0.070(3) 0.081(4) 0.081(4) -0.029(3) -0.027(3) 0.011(3)
C14 0.063(3) 0.082(4) 0.082(4) -0.031(3) -0.027(3) 0.010(3)
C15 0.068(3) 0.085(4) 0.086(4) -0.041(3) -0.031(3) 0.008(3)
C16 0.108(5) 0.089(4) 0.109(5) -0.049(4) -0.056(4) 0.010(4)
C17 0.103(5) 0.114(6) 0.087(5) -0.045(4) -0.047(4) 0.008(4)
C18 0.104(5) 0.126(6) 0.107(5) -0.067(5) -0.031(4) -0.022(4)
C19 0.052(3) 0.096(4) 0.065(3) -0.038(3) -0.015(2) -0.008(3)
C20 0.055(3) 0.095(4) 0.084(4) -0.042(3) -0.022(3) -0.013(3)
C21 0.072(3) 0.086(4) 0.071(3) -0.034(3) -0.020(3) -0.015(3)
C22 0.064(3) 0.073(3) 0.066(3) -0.032(3) -0.016(2) -0.003(2)
C23 0.055(3) 0.073(3) 0.058(3) -0.025(2) -0.018(2) -0.008(2)
C24 0.051(3) 0.075(3) 0.058(3) -0.024(2) -0.017(2) -0.001(2)
C25 0.055(3) 0.079(4) 0.074(3) -0.031(3) -0.019(2) 0.004(2)
C26 0.050(3) 0.089(4) 0.075(4) -0.023(3) -0.015(2) 0.001(3)
C27 0.048(3) 0.115(5) 0.098(5) -0.049(4) -0.019(3) -0.006(3)
C28 0.047(3) 0.110(5) 0.087(4) -0.049(4) -0.016(3) -0.014(3)
C29 0.055(3) 0.100(5) 0.099(5) -0.028(4) -0.014(3) 0.003(3)
C30 0.074(4) 0.102(5) 0.097(5) -0.026(4) -0.016(4) 0.007(4)
C31 0.059(4) 0.104(5) 0.137(7) -0.009(5) -0.008(4) 0.007(4)
C32 0.075(5) 0.125(7) 0.175(10) -0.037(7) -0.019(5) 0.006(4)
C33 0.066(6) 0.161(11) 0.280(18) -0.019(11) 0.017(8) 0.004(6)
C34 0.115(8) 0.116(7) 0.209(12) -0.018(8) 0.045(8) 0.024(6)
C35 0.091(5) 0.109(6) 0.146(8) -0.035(6) 0.002(5) 0.029(5)
C36 0.080(4) 0.098(4) 0.092(4) -0.056(4) -0.019(3) -0.013(3)
C37 0.060(3) 0.105(4) 0.061(3) -0.042(3) -0.011(2) -0.013(3)
C38 0.056(3) 0.115(5) 0.065(3) -0.048(3) -0.007(3) -0.011(3)
C39 0.053(3) 0.113(5) 0.079(4) -0.059(4) -0.016(3) -0.003(3)
C40 0.051(3) 0.092(4) 0.077(4) -0.046(3) -0.026(3) 0.004(2)
C41 0.050(3) 0.094(4) 0.068(3) -0.048(3) -0.019(2) -0.006(2)
C42 0.055(3) 0.087(4) 0.069(3) -0.042(3) -0.020(2) -0.001(2)
C43 0.081(4) 0.097(5) 0.078(4) -0.037(4) -0.036(3) 0.009(3)
C44 0.109(5) 0.098(5) 0.071(4) -0.028(4) -0.031(4) -0.013(4)
C45 0.082(4) 0.104(5) 0.070(4) -0.026(4) -0.015(3) -0.023(4)
C46 0.053(3) 0.093(4) 0.072(4) -0.038(3) -0.005(3) -0.020(3)
C47 0.058(5) 0.134(11) 0.092(7) -0.045(8) -0.006(5) -0.016(5)
C48 0.060(5) 0.109(9) 0.082(6) -0.036(6) -0.004(4) -0.020(5)
C49 0.069(7) 0.121(8) 0.071(6) -0.036(6) -0.011(5) -0.015(5)
C50 0.088(6) 0.108(8) 0.073(6) -0.044(6) -0.023(5) 0.008(7)
C51 0.117(10) 0.084(9) 0.078(7) -0.017(7) -0.017(6) -0.013(6)
C52 0.060(5) 0.118(8) 0.112(11) -0.031(8) -0.025(7) -0.020(6)
C53 0.100(10) 0.167(15) 0.081(8) -0.052(8) 0.016(7) -0.066(11)
N9 0.092(8) 0.156(13) 0.090(7) -0.033(7) -0.016(5) -0.002(7)
C54 0.052(3) 0.124(5) 0.101(5) -0.061(4) -0.008(3) 0.004(3)
Ru2 0.0546(2) 0.0882(3) 0.0762(3) -0.0423(2) -0.0281(2) 0.0100(2)
N10 0.059(3) 0.086(3) 0.078(3) -0.034(3) -0.026(2) 0.007(2)
N11 0.054(2) 0.080(3) 0.069(3) -0.029(2) -0.027(2) 0.009(2)
N13 0.063(3) 0.079(3) 0.073(3) -0.030(2) -0.030(2) 0.005(2)
N14 0.058(2) 0.085(3) 0.080(3) -0.034(3) -0.031(2) 0.007(2)
N15 0.058(3) 0.100(4) 0.125(5) -0.051(4) 0.000(3) -0.010(3)
N16 0.047(2) 0.091(3) 0.073(3) -0.047(2) -0.024(2) 0.005(2)
N17 0.060(2) 0.079(3) 0.073(3) -0.033(2) -0.023(2) -0.002(2)
C55 0.064(3) 0.095(4) 0.086(4) -0.046(3) -0.028(3) 0.005(3)
C56 0.077(4) 0.103(5) 0.099(5) -0.047(4) -0.041(4) 0.003(3)
C57 0.086(4) 0.081(4) 0.078(4) -0.033(3) -0.037(3) 0.002(3)
C58 0.078(4) 0.087(4) 0.073(4) -0.040(3) -0.028(3) 0.010(3)
C59 0.063(3) 0.074(3) 0.069(3) -0.031(3) -0.028(3) 0.012(2)
C60 0.061(3) 0.081(4) 0.069(3) -0.030(3) -0.026(3) 0.013(3)
C61 0.066(3) 0.089(4) 0.073(4) -0.034(3) -0.021(3) 0.011(3)
C62 0.056(3) 0.101(4) 0.087(4) -0.030(4) -0.025(3) 0.011(3)
C63 0.060(3) 0.107(5) 0.108(5) -0.052(4) -0.034(3) 0.006(3)
C64 0.060(3) 0.109(5) 0.100(5) -0.053(4) -0.033(3) 0.005(3)
C65 0.063(3) 0.098(5) 0.103(5) -0.043(4) -0.024(3) 0.002(3)
C66 0.074(4) 0.088(4) 0.097(5) -0.037(4) -0.028(3) -0.003(3)
C67 0.063(3) 0.084(4) 0.093(4) -0.024(3) -0.011(3) -0.011(3)
C68 0.061(3) 0.091(4) 0.109(5) -0.034(4) -0.006(3) -0.008(3)
C69 0.079(4) 0.086(5) 0.132(6) -0.045(4) 0.005(4) -0.019(3)
C70 0.088(5) 0.089(4) 0.093(5) -0.038(4) -0.007(4) 0.000(3)
C71 0.067(4) 0.099(5) 0.125(6) -0.047(5) -0.009(4) -0.009(3)
C72 0.114(5) 0.098(5) 0.094(5) -0.050(4) -0.040(4) -0.002(4)
C73 0.082(4) 0.086(5) 0.100(5) -0.043(4) -0.031(4) 0.006(3)
C74 0.096(5) 0.088(5) 0.099(5) -0.021(4) -0.038(4) -0.001(4)
C75 0.086(4) 0.102(5) 0.090(5) -0.022(4) -0.029(4) -0.002(4)
C76 0.065(3) 0.113(5) 0.085(4) -0.037(4) -0.024(3) 0.002(3)
C77 0.052(3) 0.094(4) 0.072(4) -0.031(3) -0.022(2) 0.005(3)
C78 0.047(3) 0.094(4) 0.074(4) -0.036(3) -0.023(2) 0.006(2)
C79 0.057(3) 0.115(5) 0.075(4) -0.043(4) -0.023(3) 0.003(3)
C80 0.073(4) 0.108(5) 0.077(4) -0.045(4) -0.022(3) -0.005(3)
C81 0.075(4) 0.095(4) 0.084(4) -0.039(3) -0.031(3) 0.004(3)
C82 0.066(3) 0.097(5) 0.069(3) -0.035(3) -0.032(3) 0.007(3)
C83 0.116(6) 0.111(5) 0.085(5) -0.039(4) -0.036(4) -0.018(4)
C84 0.099(5) 0.122(6) 0.082(5) -0.044(4) -0.019(4) -0.035(4)
C85 0.219(9) 0.120(6) 0.083(5) -0.024(4) -0.043(5) -0.076(6)
C86 0.265(11) 0.117(6) 0.089(5) -0.028(5) -0.071(6) -0.059(7)
C87 0.359(13) 0.132(7) 0.107(6) -0.021(6) -0.094(8) -0.087(9)
C88 0.454(15) 0.134(8) 0.132(8) -0.026(7) -0.112(10) -0.087(9)
C89 0.359(13) 0.120(7) 0.105(6) -0.025(5) -0.080(8) -0.076(8)
N12 0.443(13) 0.143(7) 0.123(6) -0.033(6) -0.126(8) -0.093(8)
C90 0.179(10) 0.119(7) 0.097(6) -0.018(5) -0.042(6) -0.009(6)
C91 0.070(3) 0.085(4) 0.077(4) -0.034(3) -0.026(3) 0.005(3)
C92 0.067(3) 0.094(4) 0.079(4) -0.042(3) -0.019(3) -0.006(3)
C93 0.053(3) 0.091(4) 0.086(4) -0.053(3) -0.019(3) 0.003(3)
C94 0.056(3) 0.083(4) 0.079(4) -0.045(3) -0.024(3) 0.004(2)
C95 0.056(3) 0.078(3) 0.074(3) -0.039(3) -0.025(3) -0.001(2)
C96 0.051(3) 0.075(3) 0.074(3) -0.040(3) -0.026(2) 0.004(2)
C97 0.051(3) 0.085(4) 0.085(4) -0.044(3) -0.020(3) 0.000(2)
C98 0.069(3) 0.085(4) 0.083(4) -0.039(3) -0.024(3) -0.004(3)
C99 0.064(3) 0.102(5) 0.081(4) -0.044(4) -0.017(3) -0.010(3)
C100 0.054(3) 0.092(4) 0.083(4) -0.049(3) -0.027(3) 0.006(3)
C101 0.041(6) 0.116(11) 0.102(11) -0.072(9) -0.014(6) 0.012(6)
C102 0.074(6) 0.105(7) 0.098(7) -0.054(6) -0.023(6) -0.004(5)
C103 0.057(5) 0.114(8) 0.164(12) -0.078(8) -0.019(6) -0.017(5)
C104 0.086(7) 0.089(7) 0.097(7) -0.017(6) -0.020(6) -0.029(5)
C105 0.082(8) 0.092(8) 0.171(14) -0.012(9) -0.022(9) -0.005(6)
C106 0.069(6) 0.131(11) 0.149(12) -0.066(10) -0.012(7) -0.004(7)
C107 0.073(6) 0.095(7) 0.101(7) -0.047(6) -0.016(5) -0.013(5)
N18 0.097(8) 0.110(8) 0.200(14) -0.070(9) -0.020(9) 0.010(6)
C108 0.072(7) 0.096(8) 0.064(8) -0.043(7) -0.010(6) -0.006(5)
P1 0.0917(14) 0.223(3) 0.155(2) -0.131(2) -0.0640(15) 0.0330(16)
F6 0.163(5) 0.271(8) 0.233(7) -0.188(7) -0.125(5) 0.094(5)
F1 0.082(3) 0.308(9) 0.203(6) -0.141(7) -0.038(4) -0.011(4)
F2 0.173(6) 0.219(7) 0.190(6) -0.095(5) -0.104(5) -0.011(5)
F3 0.105(3) 0.208(6) 0.150(4) -0.112(4) -0.023(3) -0.015(3)
F4 0.129(4) 0.181(5) 0.207(6) -0.089(5) -0.076(4) -0.007(4)
F5 0.084(3) 0.271(7) 0.143(4) -0.089(5) -0.043(3) 0.021(4)
P2 0.0701(9) 0.1268(15) 0.0630(9) -0.0326(10) -0.0186(7) 0.0092(9)
F7 0.086(3) 0.155(4) 0.087(3) -0.020(3) -0.016(2) -0.012(3)
F8 0.068(2) 0.185(4) 0.077(2) -0.067(3) -0.0196(17) 0.011(2)
F9 0.069(2) 0.145(3) 0.071(2) -0.026(2) -0.0141(17) 0.012(2)
F10 0.097(3) 0.117(3) 0.078(2) -0.036(2) -0.020(2) 0.003(2)
F11 0.113(3) 0.108(3) 0.069(2) -0.029(2) -0.021(2) 0.007(2)
F12 0.080(2) 0.140(3) 0.096(3) -0.049(2) -0.040(2) 0.019(2)
P3 0.1051(14) 0.1012(14) 0.1049(14) -0.0313(11) -0.0371(12) -0.0239(11)
F13 0.122(6) 0.132(7) 0.206(11) -0.009(7) 0.016(6) -0.003(5)
F14 0.269(15) 0.135(6) 0.183(10) -0.055(6) -0.180(11) 0.015(7)
F16 0.149(8) 0.199(9) 0.188(10) 0.031(7) -0.048(7) -0.090(7)
F18 0.40(2) 0.229(11) 0.129(8) -0.023(8) -0.064(11) -0.193(14)
F15 0.151(5) 0.119(4) 0.177(5) -0.026(4) -0.053(4) 0.015(3)
F17 0.321(11) 0.110(4) 0.216(8) -0.069(5) -0.087(7) 0.039(5)
P4 0.0608(8) 0.1025(12) 0.0873(11) -0.0514(9) -0.0151(7) -0.0116(7)
F19 0.068(2) 0.138(3) 0.106(3) -0.063(3) -0.0081(19) -0.029(2)
F20 0.073(2) 0.117(3) 0.115(3) -0.070(2) -0.006(2) -0.0091(19)
F21 0.107(3) 0.125(3) 0.100(3) -0.054(2) -0.033(2) -0.021(2)
F22 0.0590(18) 0.110(3) 0.124(3) -0.063(2) -0.0181(18) -0.0110(17)
F23 0.073(2) 0.111(3) 0.108(3) -0.064(2) -0.0077(19) -0.0161(18)
F24 0.081(2) 0.127(3) 0.100(3) -0.041(2) -0.026(2) -0.011(2)
 
_geom_special_details
;
 All esds (except the esd in the dihedral angle between two l.s. planes)
 are estimated using the full covariance matrix.  The cell esds are taken
 into account individually in the estimation of esds in distances, angles
 and torsion angles; correlations between esds in cell parameters are only
 used when they are defined by crystal symmetry.  An approximate (isotropic)
 treatment of cell esds is used for estimating esds involving l.s. planes.
;
 
loop_
 _geom_bond_atom_site_label_1
 _geom_bond_atom_site_label_2
 _geom_bond_distance
 _geom_bond_site_symmetry_2
 _geom_bond_publ_flag
Ru1 N5 2.035(4) . ?
Ru1 N2 2.044(5) . ?
Ru1 N4 2.050(4) . ?
Ru1 N8 2.050(4) . ?
Ru1 N1 2.059(4) . ?
Ru1 N7 2.059(4) . ?
N1 C1 1.346(7) . ?
N1 C5 1.368(7) . ?
N2 C10 1.318(8) . ?
N2 C6 1.368(6) . ?
N3 C16 1.337(8) . ?
N3 C15 1.351(8) . ?
N4 C19 1.344(6) . ?
N4 C23 1.369(6) . ?
N5 C28 1.358(6) . ?
N5 C24 1.361(6) . ?
N6 C33 1.27(2) . ?
N6 C34 1.352(19) . ?
N7 C37 1.342(7) . ?
N7 C41 1.371(7) . ?
N8 C46 1.354(7) . ?
N8 C42 1.374(6) . ?
C1 C2 1.350(7) . ?
C1 H1 0.9500 . ?
C2 C3 1.394(9) . ?
C2 H2 0.9500 . ?
C3 C4 1.374(9) . ?
C3 C18 1.513(8) . ?
C4 C5 1.377(7) . ?
C4 H4 0.9500 . ?
C5 C6 1.487(8) . ?
C6 C7 1.404(8) . ?
C7 C8 1.375(9) . ?
C7 H7 0.9500 . ?
C8 C9 1.368(9) . ?
C8 C11 1.491(10) . ?
C9 C10 1.384(9) . ?
C9 H9 0.9500 . ?
C10 H10 0.9500 . ?
C11 C12 1.277(9) . ?
C11 H11 0.9500 . ?
C12 C13 1.504(9) . ?
C12 H12 0.9500 . ?
C13 C14 1.356(8) . ?
C13 C17 1.397(10) . ?
C14 C15 1.372(9) . ?
C14 H14 0.9500 . ?
C15 H15 0.9500 . ?
C16 C17 1.404(10) . ?
C16 H16 0.9500 . ?
C17 H17 0.9500 . ?
C18 H18A 0.9800 . ?
C18 H18B 0.9800 . ?
C18 H18C 0.9800 . ?
C19 C20 1.370(8) . ?
C19 H19 0.9500 . ?
C20 C21 1.385(8) . ?
C20 H20 0.9500 . ?
C21 C22 1.390(8) . ?
C21 C36 1.515(8) . ?
C22 C23 1.379(7) . ?
C22 H22 0.9500 . ?
C23 C24 1.466(7) . ?
C24 C25 1.391(7) . ?
C25 C26 1.385(8) . ?
C25 H25 0.9500 . ?
C26 C27 1.387(9) . ?
C26 C29 1.465(8) . ?
C27 C28 1.353(8) . ?
C27 H27 0.9500 . ?
C28 H28 0.9500 . ?
C29 C30 1.249(10) . ?
C29 H29 0.9500 . ?
C30 C31 1.501(9) . ?
C30 H30 0.9500 . ?
C31 C32 1.329(13) . ?
C31 C35 1.345(13) . ?
C32 C33 1.428(14) . ?
C32 H32 0.9500 . ?
C33 H33 0.9500 . ?
C34 C35 1.371(12) . ?
C34 H34 0.9500 . ?
C35 H35 0.9500 . ?
C36 H36A 0.9800 . ?
C36 H36B 0.9800 . ?
C36 H36C 0.9800 . ?
C37 C38 1.364(8) . ?
C37 H37 0.9500 . ?
C38 C39 1.378(9) . ?
C38 H38 0.9500 . ?
C39 C40 1.392(9) . ?
C39 C54 1.491(8) . ?
C40 C41 1.373(7) . ?
C40 H40 0.9500 . ?
C41 C42 1.485(8) . ?
C42 C43 1.358(9) . ?
C43 C44 1.407(10) . ?
C43 H43 0.9500 . ?
C44 C45 1.395(10) . ?
C44 C47 1.519(16) . ?
C44 C48A 1.55(3) . ?
C45 C46 1.355(9) . ?
C45 H45 0.9500 . ?
C46 H46 0.9500 . ?
C47 C48 1.261(18) . ?
C47 H47 0.9500 . ?
C48 C49 1.496(17) . ?
C48 H48 0.9500 . ?
C49 C50 1.334(17) . ?
C49 C52 1.356(18) . ?
C50 C51 1.412(16) . ?
C50 H50 0.9500 . ?
C51 N9 1.310(15) . ?
C51 H51 0.9500 . ?
C52 C53 1.39(2) . ?
C52 H52 0.9500 . ?
C53 N9 1.376(16) . ?
C53 H53 0.9500 . ?
C47A C51A 1.30(3) . ?
C47A C48A 1.46(5) . ?
C47A H47A 0.9500 . ?
C48A H48A 0.9500 . ?
C49A C50A 1.3900 . ?
C49A N9A 1.3900 . ?
C49A H49A 0.9500 . ?
C50A C51A 1.3900 . ?
C50A H50A 0.9500 . ?
C51A C52A 1.3900 . ?
C52A C53A 1.3900 . ?
C52A H52A 0.9500 . ?
C53A N9A 1.3900 . ?
C53A H53A 0.9500 . ?
C54 H54A 0.9800 . ?
C54 H54B 0.9800 . ?
C54 H54C 0.9800 . ?
Ru2 N14 2.041(5) . ?
Ru2 N16 2.046(5) . ?
Ru2 N13 2.053(5) . ?
Ru2 N11 2.054(5) . ?
Ru2 N17 2.054(5) . ?
Ru2 N10 2.059(5) . ?
N10 C73 1.339(8) . ?
N10 C77 1.366(7) . ?
N11 C82 1.320(8) . ?
N11 C78 1.366(7) . ?
N13 C55 1.334(7) . ?
N13 C59 1.368(7) . ?
N14 C64 1.360(7) . ?
N14 C60 1.361(7) . ?
N15 C71 1.318(9) . ?
N15 C69 1.336(10) . ?
N16 C96 1.357(6) . ?
N16 C100 1.359(8) . ?
N17 C91 1.339(8) . ?
N17 C95 1.382(7) . ?
C55 C56 1.376(8) . ?
C55 H55 0.9500 . ?
C56 C57 1.389(9) . ?
C56 H56 0.9500 . ?
C57 C58 1.373(9) . ?
C57 C72 1.495(8) . ?
C58 C59 1.381(8) . ?
C58 H58 0.9500 . ?
C59 C60 1.470(8) . ?
C60 C61 1.382(8) . ?
C61 C62 1.400(9) . ?
C61 H61 0.9500 . ?
C62 C63 1.395(9) . ?
C62 C65 1.468(8) . ?
C63 C64 1.342(8) . ?
C63 H63 0.9500 . ?
C64 H64 0.9500 . ?
C65 C66 1.290(9) . ?
C65 H65 0.9500 . ?
C66 C67 1.498(9) . ?
C66 H66 0.9500 . ?
C67 C70 1.359(10) . ?
C67 C68 1.372(9) . ?
C68 C69 1.371(9) . ?
C68 H68 0.9500 . ?
C69 H69 0.9500 . ?
C70 C71 1.412(9) . ?
C70 H70 0.9500 . ?
C71 H71 0.9500 . ?
C72 H72A 0.9800 . ?
C72 H72B 0.9800 . ?
C72 H72C 0.9800 . ?
C73 C74 1.376(10) . ?
C73 H73 0.9500 . ?
C74 C75 1.401(10) . ?
C74 H74 0.9500 . ?
C75 C76 1.392(10) . ?
C75 C90 1.519(11) . ?
C76 C77 1.377(9) . ?
C76 H76 0.9500 . ?
C77 C78 1.458(9) . ?
C78 C79 1.398(8) . ?
C79 C80 1.376(10) . ?
C79 H79 0.9500 . ?
C80 C81 1.385(9) . ?
C80 C83 1.475(9) . ?
C81 C82 1.395(8) . ?
C81 H81 0.9500 . ?
C82 H82 0.9500 . ?
C83 C84 1.304(10) . ?
C83 H83 0.9500 . ?
C84 C85 1.462(10) . ?
C84 H84 0.9500 . ?
C85 C89 1.335(13) . ?
C85 C86 1.337(11) . ?
C86 C87 1.373(12) . ?
C86 H86 0.9500 . ?
C87 N12 1.280(13) . ?
C87 H87 0.9500 . ?
C88 N12 1.284(14) . ?
C88 C89 1.405(14) . ?
C88 H88 0.9500 . ?
C89 H89 0.9500 . ?
C90 H90A 0.9800 . ?
C90 H90B 0.9800 . ?
C90 H90C 0.9800 . ?
C91 C92 1.372(8) . ?
C91 H91 0.9500 . ?
C92 C93 1.390(9) . ?
C92 H92 0.9500 . ?
C93 C208 1.28(4) . ?
C93 C94 1.392(9) . ?
C93 C101 1.541(16) . ?
C94 C95 1.370(7) . ?
C94 H94 0.9500 . ?
C95 C96 1.463(8) . ?
C96 C97 1.384(8) . ?
C97 C98 1.381(9) . ?
C97 H97 0.9500 . ?
C98 C99 1.366(8) . ?
C98 C108 1.438(16) . ?
C98 C201 1.62(4) . ?
C99 C100 1.349(9) . ?
C99 H99 0.9500 . ?
C100 H100 0.9500 . ?
C101 C102 1.22(2) . ?
C101 H101 0.9500 . ?
C102 C103 1.485(14) . ?
C102 H102 0.9500 . ?
C103 C107 1.392(16) . ?
C103 C104 1.478(17) . ?
C104 C105 1.281(17) . ?
C104 H104 0.9500 . ?
C105 N18 1.302(19) . ?
C105 H105 0.9500 . ?
C106 N18 1.343(18) . ?
C106 C107 1.409(15) . ?
C106 H106 0.9500 . ?
C107 H107 0.9500 . ?
C108 H10A 0.9800 . ?
C108 H10B 0.9800 . ?
C108 H10C 0.9800 . ?
C201 C202 1.02(3) . ?
C201 H201 0.9500 . ?
C202 C203 1.50(2) . ?
C202 H202 0.9500 . ?
C203 C204 1.3900 . ?
C203 C206 1.3900 . ?
C204 C205 1.3900 . ?
C204 H204 0.9500 . ?
C205 N18A 1.3900 . ?
C205 H205 0.9500 . ?
N18A C207 1.3900 . ?
C207 C206 1.3900 . ?
C207 H207 0.9500 . ?
C206 H206 0.9500 . ?
C208 H20A 0.9800 . ?
C208 H20B 0.9800 . ?
C208 H20C 0.9800 . ?
P1 F6 1.537(6) . ?
P1 F3 1.567(6) . ?
P1 F1 1.573(7) . ?
P1 F4 1.575(7) . ?
P1 F2 1.587(8) . ?
P1 F5 1.620(7) . ?
P2 F10 1.581(5) . ?
P2 F11 1.589(4) . ?
P2 F12 1.596(4) . ?
P2 F8 1.597(4) . ?
P2 F7 1.598(5) . ?
P2 F9 1.599(4) . ?
P3 F17 1.506(6) . ?
P3 F16A 1.51(2) . ?
P3 F14 1.515(6) . ?
P3 F18A 1.551(19) . ?
P3 F16 1.563(9) . ?
P3 F13 1.582(9) . ?
P3 F13A 1.58(3) . ?
P3 F15 1.586(6) . ?
P3 F14A 1.60(3) . ?
P3 F18 1.601(11) . ?
P4 F23 1.585(4) . ?
P4 F22 1.587(4) . ?
P4 F24 1.594(5) . ?
P4 F21 1.595(5) . ?
P4 F19 1.596(4) . ?
P4 F20 1.596(4) . ?
 
loop_
 _geom_angle_atom_site_label_1
 _geom_angle_atom_site_label_2
 _geom_angle_atom_site_label_3
 _geom_angle
 _geom_angle_site_symmetry_1
 _geom_angle_site_symmetry_3
 _geom_angle_publ_flag
N5 Ru1 N2 86.36(18) . . ?
N5 Ru1 N4 78.62(16) . . ?
N2 Ru1 N4 96.45(17) . . ?
N5 Ru1 N8 98.22(17) . . ?
N2 Ru1 N8 172.80(16) . . ?
N4 Ru1 N8 89.92(16) . . ?
N5 Ru1 N1 96.00(16) . . ?
N2 Ru1 N1 79.73(18) . . ?
N4 Ru1 N1 173.66(16) . . ?
N8 Ru1 N1 94.21(17) . . ?
N5 Ru1 N7 173.58(15) . . ?
N2 Ru1 N7 97.18(18) . . ?
N4 Ru1 N7 95.62(15) . . ?
N8 Ru1 N7 78.80(17) . . ?
N1 Ru1 N7 89.91(15) . . ?
C1 N1 C5 117.1(4) . . ?
C1 N1 Ru1 127.7(4) . . ?
C5 N1 Ru1 115.2(4) . . ?
C10 N2 C6 117.9(5) . . ?
C10 N2 Ru1 126.3(4) . . ?
C6 N2 Ru1 115.7(4) . . ?
C16 N3 C15 115.5(6) . . ?
C19 N4 C23 117.6(4) . . ?
C19 N4 Ru1 126.4(3) . . ?
C23 N4 Ru1 116.0(3) . . ?
C28 N5 C24 116.3(4) . . ?
C28 N5 Ru1 126.5(4) . . ?
C24 N5 Ru1 116.7(3) . . ?
C33 N6 C34 112.7(10) . . ?
C37 N7 C41 117.6(5) . . ?
C37 N7 Ru1 126.2(4) . . ?
C41 N7 Ru1 116.1(3) . . ?
C46 N8 C42 117.0(5) . . ?
C46 N8 Ru1 126.0(4) . . ?
C42 N8 Ru1 116.7(4) . . ?
N1 C1 C2 123.9(6) . . ?
N1 C1 H1 118.0 . . ?
C2 C1 H1 118.0 . . ?
C1 C2 C3 119.0(6) . . ?
C1 C2 H2 120.5 . . ?
C3 C2 H2 120.5 . . ?
C4 C3 C2 118.3(5) . . ?
C4 C3 C18 121.5(6) . . ?
C2 C3 C18 120.2(6) . . ?
C3 C4 C5 120.1(6) . . ?
C3 C4 H4 120.0 . . ?
C5 C4 H4 120.0 . . ?
N1 C5 C4 121.5(6) . . ?
N1 C5 C6 114.7(4) . . ?
C4 C5 C6 123.7(5) . . ?
N2 C6 C7 120.1(5) . . ?
N2 C6 C5 114.6(5) . . ?
C7 C6 C5 125.2(5) . . ?
C8 C7 C6 120.1(5) . . ?
C8 C7 H7 119.9 . . ?
C6 C7 H7 119.9 . . ?
C9 C8 C7 119.1(6) . . ?
C9 C8 C11 117.9(6) . . ?
C7 C8 C11 123.0(6) . . ?
C8 C9 C10 118.2(6) . . ?
C8 C9 H9 120.9 . . ?
C10 C9 H9 120.9 . . ?
N2 C10 C9 124.5(6) . . ?
N2 C10 H10 117.7 . . ?
C9 C10 H10 117.7 . . ?
C12 C11 C8 126.0(7) . . ?
C12 C11 H11 117.0 . . ?
C8 C11 H11 117.0 . . ?
C11 C12 C13 124.8(7) . . ?
C11 C12 H12 117.6 . . ?
C13 C12 H12 117.6 . . ?
C14 C13 C17 117.1(6) . . ?
C14 C13 C12 119.4(6) . . ?
C17 C13 C12 123.3(6) . . ?
C13 C14 C15 120.1(6) . . ?
C13 C14 H14 119.9 . . ?
C15 C14 H14 119.9 . . ?
N3 C15 C14 124.7(6) . . ?
N3 C15 H15 117.7 . . ?
C14 C15 H15 117.7 . . ?
N3 C16 C17 122.9(6) . . ?
N3 C16 H16 118.5 . . ?
C17 C16 H16 118.5 . . ?
C13 C17 C16 119.6(6) . . ?
C13 C17 H17 120.2 . . ?
C16 C17 H17 120.2 . . ?
C3 C18 H18A 109.5 . . ?
C3 C18 H18B 109.5 . . ?
H18A C18 H18B 109.5 . . ?
C3 C18 H18C 109.5 . . ?
H18A C18 H18C 109.5 . . ?
H18B C18 H18C 109.5 . . ?
N4 C19 C20 122.7(5) . . ?
N4 C19 H19 118.7 . . ?
C20 C19 H19 118.7 . . ?
C19 C20 C21 120.6(5) . . ?
C19 C20 H20 119.7 . . ?
C21 C20 H20 119.7 . . ?
C20 C21 C22 117.1(5) . . ?
C20 C21 C36 121.4(5) . . ?
C22 C21 C36 121.6(5) . . ?
C23 C22 C21 120.4(5) . . ?
C23 C22 H22 119.8 . . ?
C21 C22 H22 119.8 . . ?
N4 C23 C22 121.6(4) . . ?
N4 C23 C24 114.1(4) . . ?
C22 C23 C24 124.2(5) . . ?
N5 C24 C25 121.9(5) . . ?
N5 C24 C23 114.4(4) . . ?
C25 C24 C23 123.7(5) . . ?
C26 C25 C24 120.2(5) . . ?
C26 C25 H25 119.9 . . ?
C24 C25 H25 119.9 . . ?
C25 C26 C27 117.2(5) . . ?
C25 C26 C29 124.3(6) . . ?
C27 C26 C29 118.5(6) . . ?
C28 C27 C26 120.1(5) . . ?
C28 C27 H27 120.0 . . ?
C26 C27 H27 120.0 . . ?
C27 C28 N5 124.1(6) . . ?
C27 C28 H28 117.9 . . ?
N5 C28 H28 117.9 . . ?
C30 C29 C26 127.0(7) . . ?
C30 C29 H29 116.5 . . ?
C26 C29 H29 116.5 . . ?
C29 C30 C31 126.0(8) . . ?
C29 C30 H30 117.0 . . ?
C31 C30 H30 117.0 . . ?
C32 C31 C35 118.1(8) . . ?
C32 C31 C30 122.2(9) . . ?
C35 C31 C30 119.6(8) . . ?
C31 C32 C33 118.4(12) . . ?
C31 C32 H32 120.8 . . ?
C33 C32 H32 120.8 . . ?
N6 C33 C32 126.0(15) . . ?
N6 C33 H33 117.0 . . ?
C32 C33 H33 117.0 . . ?
N6 C34 C35 125.7(14) . . ?
N6 C34 H34 117.2 . . ?
C35 C34 H34 117.2 . . ?
C31 C35 C34 119.0(12) . . ?
C31 C35 H35 120.5 . . ?
C34 C35 H35 120.5 . . ?
C21 C36 H36A 109.5 . . ?
C21 C36 H36B 109.5 . . ?
H36A C36 H36B 109.5 . . ?
C21 C36 H36C 109.5 . . ?
H36A C36 H36C 109.5 . . ?
H36B C36 H36C 109.5 . . ?
N7 C37 C38 122.8(6) . . ?
N7 C37 H37 118.6 . . ?
C38 C37 H37 118.6 . . ?
C37 C38 C39 120.9(6) . . ?
C37 C38 H38 119.5 . . ?
C39 C38 H38 119.5 . . ?
C38 C39 C40 116.5(5) . . ?
C38 C39 C54 121.1(6) . . ?
C40 C39 C54 122.4(6) . . ?
C41 C40 C39 121.2(6) . . ?
C41 C40 H40 119.4 . . ?
C39 C40 H40 119.4 . . ?
N7 C41 C40 121.0(5) . . ?
N7 C41 C42 114.5(4) . . ?
C40 C41 C42 124.5(6) . . ?
C43 C42 N8 121.4(6) . . ?
C43 C42 C41 124.8(5) . . ?
N8 C42 C41 113.8(5) . . ?
C42 C43 C44 120.9(6) . . ?
C42 C43 H43 119.5 . . ?
C44 C43 H43 119.5 . . ?
C45 C44 C43 117.1(7) . . ?
C45 C44 C47 113.3(7) . . ?
C43 C44 C47 129.5(7) . . ?
C45 C44 C48A 144.2(14) . . ?
C43 C44 C48A 98.2(13) . . ?
C46 C45 C44 119.1(6) . . ?
C46 C45 H45 120.5 . . ?
C44 C45 H45 120.5 . . ?
C45 C46 N8 124.3(6) . . ?
C45 C46 H46 117.9 . . ?
N8 C46 H46 117.9 . . ?
C48 C47 C44 119.9(11) . . ?
C48 C47 H47 120.0 . . ?
C44 C47 H47 120.0 . . ?
C47 C48 C49 122.8(11) . . ?
C47 C48 H48 118.6 . . ?
C49 C48 H48 118.6 . . ?
C50 C49 C52 117.1(10) . . ?
C50 C49 C48 121.3(11) . . ?
C52 C49 C48 121.6(12) . . ?
C49 C50 C51 121.4(11) . . ?
C49 C50 H50 119.3 . . ?
C51 C50 H50 119.3 . . ?
N9 C51 C50 124.4(13) . . ?
N9 C51 H51 117.8 . . ?
C50 C51 H51 117.8 . . ?
C49 C52 C53 119.0(11) . . ?
C49 C52 H52 120.5 . . ?
C53 C52 H52 120.5 . . ?
N9 C53 C52 125.2(13) . . ?
N9 C53 H53 117.4 . . ?
C52 C53 H53 117.4 . . ?
C51 N9 C53 112.8(15) . . ?
C51A C47A C48A 127(3) . . ?
C51A C47A H47A 116.5 . . ?
C48A C47A H47A 116.5 . . ?
C47A C48A C44 117(3) . . ?
C47A C48A H48A 121.4 . . ?
C44 C48A H48A 121.4 . . ?
C50A C49A N9A 120.0 . . ?
C50A C49A H49A 120.0 . . ?
N9A C49A H49A 120.0 . . ?
C49A C50A C51A 120.0 . . ?
C49A C50A H50A 120.0 . . ?
C51A C50A H50A 120.0 . . ?
C47A C51A C52A 118(2) . . ?
C47A C51A C50A 122(2) . . ?
C52A C51A C50A 120.0 . . ?
C53A C52A C51A 120.0 . . ?
C53A C52A H52A 120.0 . . ?
C51A C52A H52A 120.0 . . ?
N9A C53A C52A 120.0 . . ?
N9A C53A H53A 120.0 . . ?
C52A C53A H53A 120.0 . . ?
C53A N9A C49A 120.0 . . ?
C39 C54 H54A 109.5 . . ?
C39 C54 H54B 109.5 . . ?
H54A C54 H54B 109.5 . . ?
C39 C54 H54C 109.5 . . ?
H54A C54 H54C 109.5 . . ?
H54B C54 H54C 109.5 . . ?
N14 Ru2 N16 97.27(19) . . ?
N14 Ru2 N13 78.48(18) . . ?
N16 Ru2 N13 88.83(17) . . ?
N14 Ru2 N11 97.37(17) . . ?
N16 Ru2 N11 95.77(18) . . ?
N13 Ru2 N11 174.19(17) . . ?
N14 Ru2 N17 173.59(17) . . ?
N16 Ru2 N17 79.06(19) . . ?
N13 Ru2 N17 96.09(17) . . ?
N11 Ru2 N17 88.28(17) . . ?
N14 Ru2 N10 88.40(19) . . ?
N16 Ru2 N10 172.71(17) . . ?
N13 Ru2 N10 96.81(19) . . ?
N11 Ru2 N10 78.89(19) . . ?
N17 Ru2 N10 95.70(19) . . ?
C73 N10 C77 118.3(6) . . ?
C73 N10 Ru2 126.1(4) . . ?
C77 N10 Ru2 115.6(4) . . ?
C82 N11 C78 117.6(5) . . ?
C82 N11 Ru2 127.0(4) . . ?
C78 N11 Ru2 115.5(4) . . ?
C55 N13 C59 117.6(5) . . ?
C55 N13 Ru2 126.2(4) . . ?
C59 N13 Ru2 116.2(4) . . ?
C64 N14 C60 116.6(5) . . ?
C64 N14 Ru2 126.5(4) . . ?
C60 N14 Ru2 116.9(4) . . ?
C71 N15 C69 115.0(6) . . ?
C96 N16 C100 117.9(5) . . ?
C96 N16 Ru2 116.1(4) . . ?
C100 N16 Ru2 126.0(4) . . ?
C91 N17 C95 117.1(5) . . ?
C91 N17 Ru2 127.6(4) . . ?
C95 N17 Ru2 115.3(4) . . ?
N13 C55 C56 122.7(6) . . ?
N13 C55 H55 118.6 . . ?
C56 C55 H55 118.6 . . ?
C55 C56 C57 120.4(6) . . ?
C55 C56 H56 119.8 . . ?
C57 C56 H56 119.8 . . ?
C58 C57 C56 116.8(6) . . ?
C58 C57 C72 122.7(6) . . ?
C56 C57 C72 120.5(6) . . ?
C57 C58 C59 121.0(6) . . ?
C57 C58 H58 119.5 . . ?
C59 C58 H58 119.5 . . ?
N13 C59 C58 121.4(5) . . ?
N13 C59 C60 114.2(5) . . ?
C58 C59 C60 124.4(5) . . ?
N14 C60 C61 121.7(5) . . ?
N14 C60 C59 114.2(5) . . ?
C61 C60 C59 124.0(5) . . ?
C60 C61 C62 120.5(6) . . ?
C60 C61 H61 119.8 . . ?
C62 C61 H61 119.8 . . ?
C63 C62 C61 116.9(5) . . ?
C63 C62 C65 118.2(6) . . ?
C61 C62 C65 124.9(6) . . ?
C64 C63 C62 119.8(6) . . ?
C64 C63 H63 120.1 . . ?
C62 C63 H63 120.1 . . ?
C63 C64 N14 124.5(6) . . ?
C63 C64 H64 117.7 . . ?
N14 C64 H64 117.7 . . ?
C66 C65 C62 124.5(6) . . ?
C66 C65 H65 117.8 . . ?
C62 C65 H65 117.8 . . ?
C65 C66 C67 124.5(6) . . ?
C65 C66 H66 117.7 . . ?
C67 C66 H66 117.7 . . ?
C70 C67 C68 118.0(6) . . ?
C70 C67 C66 123.7(6) . . ?
C68 C67 C66 118.2(6) . . ?
C67 C68 C69 119.0(7) . . ?
C67 C68 H68 120.5 . . ?
C69 C68 H68 120.5 . . ?
N15 C69 C68 125.1(7) . . ?
N15 C69 H69 117.4 . . ?
C68 C69 H69 117.4 . . ?
C67 C70 C71 118.8(7) . . ?
C67 C70 H70 120.6 . . ?
C71 C70 H70 120.6 . . ?
N15 C71 C70 124.1(7) . . ?
N15 C71 H71 117.9 . . ?
C70 C71 H71 117.9 . . ?
C57 C72 H72A 109.5 . . ?
C57 C72 H72B 109.5 . . ?
H72A C72 H72B 109.5 . . ?
C57 C72 H72C 109.5 . . ?
H72A C72 H72C 109.5 . . ?
H72B C72 H72C 109.5 . . ?
N10 C73 C74 122.6(6) . . ?
N10 C73 H73 118.7 . . ?
C74 C73 H73 118.7 . . ?
C73 C74 C75 119.9(7) . . ?
C73 C74 H74 120.1 . . ?
C75 C74 H74 120.1 . . ?
C76 C75 C74 117.3(7) . . ?
C76 C75 C90 121.2(7) . . ?
C74 C75 C90 121.5(8) . . ?
C77 C76 C75 120.2(6) . . ?
C77 C76 H76 119.9 . . ?
C75 C76 H76 119.9 . . ?
N10 C77 C76 121.6(6) . . ?
N10 C77 C78 114.7(5) . . ?
C76 C77 C78 123.7(6) . . ?
N11 C78 C79 121.1(6) . . ?
N11 C78 C77 115.3(5) . . ?
C79 C78 C77 123.6(6) . . ?
C80 C79 C78 120.8(6) . . ?
C80 C79 H79 119.6 . . ?
C78 C79 H79 119.6 . . ?
C79 C80 C81 117.4(6) . . ?
C79 C80 C83 122.3(6) . . ?
C81 C80 C83 120.2(7) . . ?
C80 C81 C82 119.2(7) . . ?
C80 C81 H81 120.4 . . ?
C82 C81 H81 120.4 . . ?
N11 C82 C81 123.8(6) . . ?
N11 C82 H82 118.1 . . ?
C81 C82 H82 118.1 . . ?
C84 C83 C80 127.0(8) . . ?
C84 C83 H83 116.5 . . ?
C80 C83 H83 116.5 . . ?
C83 C84 C85 126.9(8) . . ?
C83 C84 H84 116.6 . . ?
C85 C84 H84 116.6 . . ?
C89 C85 C86 115.5(9) . . ?
C89 C85 C84 122.3(9) . . ?
C86 C85 C84 121.9(8) . . ?
C85 C86 C87 121.8(10) . . ?
C85 C86 H86 119.1 . . ?
C87 C86 H86 119.1 . . ?
N12 C87 C86 123.1(10) . . ?
N12 C87 H87 118.4 . . ?
C86 C87 H87 118.4 . . ?
N12 C88 C89 124.6(12) . . ?
N12 C88 H88 117.7 . . ?
C89 C88 H88 117.7 . . ?
C85 C89 C88 118.7(11) . . ?
C85 C89 H89 120.6 . . ?
C88 C89 H89 120.6 . . ?
C87 N12 C88 115.4(10) . . ?
C75 C90 H90A 109.5 . . ?
C75 C90 H90B 109.5 . . ?
H90A C90 H90B 109.5 . . ?
C75 C90 H90C 109.5 . . ?
H90A C90 H90C 109.5 . . ?
H90B C90 H90C 109.5 . . ?
N17 C91 C92 123.2(6) . . ?
N17 C91 H91 118.4 . . ?
C92 C91 H91 118.4 . . ?
C91 C92 C93 120.4(6) . . ?
C91 C92 H92 119.8 . . ?
C93 C92 H92 119.8 . . ?
C208 C93 C92 126.0(18) . . ?
C208 C93 C94 117.2(18) . . ?
C92 C93 C94 116.8(5) . . ?
C92 C93 C101 124.0(9) . . ?
C94 C93 C101 119.2(9) . . ?
C95 C94 C93 120.8(6) . . ?
C95 C94 H94 119.6 . . ?
C93 C94 H94 119.6 . . ?
C94 C95 N17 121.6(6) . . ?
C94 C95 C96 124.0(5) . . ?
N17 C95 C96 114.4(4) . . ?
N16 C96 C97 121.0(5) . . ?
N16 C96 C95 115.1(5) . . ?
C97 C96 C95 123.9(5) . . ?
C98 C97 C96 121.1(5) . . ?
C98 C97 H97 119.4 . . ?
C96 C97 H97 119.4 . . ?
C99 C98 C97 115.7(6) . . ?
C99 C98 C108 126.3(8) . . ?
C97 C98 C108 117.9(8) . . ?
C99 C98 C201 116.5(14) . . ?
C97 C98 C201 127.2(14) . . ?
C100 C99 C98 123.2(6) . . ?
C100 C99 H99 118.4 . . ?
C98 C99 H99 118.4 . . ?
C99 C100 N16 121.0(5) . . ?
C99 C100 H100 119.5 . . ?
N16 C100 H100 119.5 . . ?
C102 C101 C93 123.0(16) . . ?
C102 C101 H101 118.5 . . ?
C93 C101 H101 118.5 . . ?
C101 C102 C103 121.7(13) . . ?
C101 C102 H102 119.2 . . ?
C103 C102 H102 119.2 . . ?
C107 C103 C104 118.2(10) . . ?
C107 C103 C102 119.5(12) . . ?
C104 C103 C102 122.3(12) . . ?
C105 C104 C103 118.5(12) . . ?
C105 C104 H104 120.8 . . ?
C103 C104 H104 120.8 . . ?
C104 C105 N18 125.9(14) . . ?
C104 C105 H105 117.0 . . ?
N18 C105 H105 117.1 . . ?
N18 C106 C107 124.6(13) . . ?
N18 C106 H106 117.7 . . ?
C107 C106 H106 117.7 . . ?
C103 C107 C106 114.8(12) . . ?
C103 C107 H107 122.6 . . ?
C106 C107 H107 122.6 . . ?
C105 N18 C106 117.7(12) . . ?
C98 C108 H10A 109.5 . . ?
C98 C108 H10B 109.5 . . ?
H10A C108 H10B 109.5 . . ?
C98 C108 H10C 109.5 . . ?
H10A C108 H10C 109.5 . . ?
H10B C108 H10C 109.5 . . ?
C202 C201 C98 130(3) . . ?
C202 C201 H201 114.8 . . ?
C98 C201 H201 114.8 . . ?
C201 C202 C203 123(3) . . ?
C201 C202 H202 118.5 . . ?
C203 C202 H202 118.5 . . ?
C204 C203 C206 120.0 . . ?
C204 C203 C202 122.6(12) . . ?
C206 C203 C202 117.4(12) . . ?
C205 C204 C203 120.0 . . ?
C205 C204 H204 120.0 . . ?
C203 C204 H204 120.0 . . ?
C204 C205 N18A 120.0 . . ?
C204 C205 H205 120.0 . . ?
N18A C205 H205 120.0 . . ?
C205 N18A C207 120.0 . . ?
C206 C207 N18A 120.0 . . ?
C206 C207 H207 120.0 . . ?
N18A C207 H207 120.0 . . ?
C207 C206 C203 120.0 . . ?
C207 C206 H206 120.0 . . ?
C203 C206 H206 120.0 . . ?
C93 C208 H20A 109.5 . . ?
C93 C208 H20B 109.5 . . ?
H20A C208 H20B 109.5 . . ?
C93 C208 H20C 109.5 . . ?
H20A C208 H20C 109.5 . . ?
H20B C208 H20C 109.5 . . ?
F6 P1 F3 176.9(6) . . ?
F6 P1 F1 88.7(4) . . ?
F3 P1 F1 89.1(4) . . ?
F6 P1 F4 93.4(4) . . ?
F3 P1 F4 88.8(3) . . ?
F1 P1 F4 177.8(4) . . ?
F6 P1 F2 93.0(4) . . ?
F3 P1 F2 89.1(4) . . ?
F1 P1 F2 89.1(4) . . ?
F4 P1 F2 91.6(4) . . ?
F6 P1 F5 88.7(4) . . ?
F3 P1 F5 89.2(4) . . ?
F1 P1 F5 90.8(4) . . ?
F4 P1 F5 88.4(3) . . ?
F2 P1 F5 178.3(4) . . ?
F10 P2 F11 90.7(2) . . ?
F10 P2 F12 90.2(2) . . ?
F11 P2 F12 90.1(2) . . ?
F10 P2 F8 90.2(3) . . ?
F11 P2 F8 179.1(3) . . ?
F12 P2 F8 89.8(2) . . ?
F10 P2 F7 179.7(3) . . ?
F11 P2 F7 89.5(3) . . ?
F12 P2 F7 89.9(3) . . ?
F8 P2 F7 89.6(3) . . ?
F10 P2 F9 89.4(2) . . ?
F11 P2 F9 90.0(2) . . ?
F12 P2 F9 179.6(3) . . ?
F8 P2 F9 90.0(2) . . ?
F7 P2 F9 90.4(2) . . ?
F17 P3 F16A 94.9(9) . . ?
F17 P3 F14 91.2(5) . . ?
F17 P3 F18A 98.1(8) . . ?
F16A P3 F18A 100.1(13) . . ?
F17 P3 F16 86.0(6) . . ?
F14 P3 F16 95.9(7) . . ?
F17 P3 F13 101.0(6) . . ?
F14 P3 F13 93.0(7) . . ?
F16 P3 F13 168.5(6) . . ?
F17 P3 F13A 72.5(12) . . ?
F16A P3 F13A 166.7(14) . . ?
F18A P3 F13A 86.2(12) . . ?
F17 P3 F15 176.9(5) . . ?
F16A P3 F15 84.6(9) . . ?
F14 P3 F15 91.0(4) . . ?
F18A P3 F15 78.9(7) . . ?
F16 P3 F15 91.7(5) . . ?
F13 P3 F15 81.1(4) . . ?
F13A P3 F15 108.1(12) . . ?
F17 P3 F14A 87.4(11) . . ?
F16A P3 F14A 98.3(15) . . ?
F18A P3 F14A 160.2(14) . . ?
F13A P3 F14A 77.4(15) . . ?
F15 P3 F14A 95.7(11) . . ?
F17 P3 F18 89.3(7) . . ?
F14 P3 F18 175.1(8) . . ?
F16 P3 F18 89.0(7) . . ?
F13 P3 F18 82.1(7) . . ?
F15 P3 F18 88.7(7) . . ?
F23 P4 F22 89.9(2) . . ?
F23 P4 F24 90.4(2) . . ?
F22 P4 F24 90.2(2) . . ?
F23 P4 F21 90.9(2) . . ?
F22 P4 F21 90.6(2) . . ?
F24 P4 F21 178.5(3) . . ?
F23 P4 F19 90.2(2) . . ?
F22 P4 F19 179.7(3) . . ?
F24 P4 F19 89.5(2) . . ?
F21 P4 F19 89.7(2) . . ?
F23 P4 F20 179.4(3) . . ?
F22 P4 F20 89.8(2) . . ?
F24 P4 F20 90.1(2) . . ?
F21 P4 F20 88.6(2) . . ?
F19 P4 F20 90.0(2) . . ?
 
loop_
 _geom_torsion_atom_site_label_1
 _geom_torsion_atom_site_label_2
 _geom_torsion_atom_site_label_3
 _geom_torsion_atom_site_label_4
 _geom_torsion
 _geom_torsion_site_symmetry_1
 _geom_torsion_site_symmetry_2
 _geom_torsion_site_symmetry_3
 _geom_torsion_site_symmetry_4
 _geom_torsion_publ_flag
C5 N1 C1 C2 2.1(7) . . . . ?
Ru1 N1 C1 C2 179.8(4) . . . . ?
N1 C1 C2 C3 0.0(8) . . . . ?
C1 C2 C3 C4 -1.9(8) . . . . ?
C1 C2 C3 C18 177.7(6) . . . . ?
C2 C3 C4 C5 1.7(8) . . . . ?
C18 C3 C4 C5 -177.9(5) . . . . ?
C1 N1 C5 C4 -2.2(7) . . . . ?
Ru1 N1 C5 C4 179.8(4) . . . . ?
C1 N1 C5 C6 176.9(4) . . . . ?
Ru1 N1 C5 C6 -1.1(5) . . . . ?
C3 C4 C5 N1 0.4(8) . . . . ?
C3 C4 C5 C6 -178.7(5) . . . . ?
C10 N2 C6 C7 -0.9(7) . . . . ?
Ru1 N2 C6 C7 176.7(4) . . . . ?
C10 N2 C6 C5 -179.2(5) . . . . ?
Ru1 N2 C6 C5 -1.6(5) . . . . ?
N1 C5 C6 N2 1.8(6) . . . . ?
C4 C5 C6 N2 -179.1(5) . . . . ?
N1 C5 C6 C7 -176.4(5) . . . . ?
C4 C5 C6 C7 2.7(8) . . . . ?
N2 C6 C7 C8 -0.5(8) . . . . ?
C5 C6 C7 C8 177.6(5) . . . . ?
C6 C7 C8 C9 0.9(9) . . . . ?
C6 C7 C8 C11 -179.3(5) . . . . ?
C7 C8 C9 C10 -0.1(10) . . . . ?
C11 C8 C9 C10 -179.8(6) . . . . ?
C6 N2 C10 C9 1.9(9) . . . . ?
Ru1 N2 C10 C9 -175.5(5) . . . . ?
C8 C9 C10 N2 -1.4(10) . . . . ?
C9 C8 C11 C12 179.8(7) . . . . ?
C7 C8 C11 C12 0.0(11) . . . . ?
C8 C11 C12 C13 -177.8(6) . . . . ?
C11 C12 C13 C14 173.2(7) . . . . ?
C11 C12 C13 C17 -2.8(11) . . . . ?
C17 C13 C14 C15 0.5(9) . . . . ?
C12 C13 C14 C15 -175.8(5) . . . . ?
C16 N3 C15 C14 -0.8(9) . . . . ?
C13 C14 C15 N3 0.1(9) . . . . ?
C15 N3 C16 C17 1.0(10) . . . . ?
C14 C13 C17 C16 -0.3(10) . . . . ?
C12 C13 C17 C16 175.8(6) . . . . ?
N3 C16 C17 C13 -0.5(11) . . . . ?
C23 N4 C19 C20 -1.2(8) . . . . ?
Ru1 N4 C19 C20 177.8(5) . . . . ?
N4 C19 C20 C21 1.4(10) . . . . ?
C19 C20 C21 C22 0.3(9) . . . . ?
C19 C20 C21 C36 -179.1(6) . . . . ?
C20 C21 C22 C23 -2.1(9) . . . . ?
C36 C21 C22 C23 177.3(6) . . . . ?
C19 N4 C23 C22 -0.8(8) . . . . ?
Ru1 N4 C23 C22 -179.8(4) . . . . ?
C19 N4 C23 C24 178.9(5) . . . . ?
Ru1 N4 C23 C24 -0.2(6) . . . . ?
C21 C22 C23 N4 2.4(9) . . . . ?
C21 C22 C23 C24 -177.2(5) . . . . ?
C28 N5 C24 C25 2.9(8) . . . . ?
Ru1 N5 C24 C25 175.3(4) . . . . ?
C28 N5 C24 C23 -177.5(5) . . . . ?
Ru1 N5 C24 C23 -5.1(6) . . . . ?
N4 C23 C24 N5 3.4(7) . . . . ?
C22 C23 C24 N5 -176.9(5) . . . . ?
N4 C23 C24 C25 -177.0(5) . . . . ?
C22 C23 C24 C25 2.6(9) . . . . ?
N5 C24 C25 C26 -4.4(9) . . . . ?
C23 C24 C25 C26 176.0(5) . . . . ?
C24 C25 C26 C27 3.3(9) . . . . ?
C24 C25 C26 C29 -178.8(6) . . . . ?
C25 C26 C27 C28 -0.9(10) . . . . ?
C29 C26 C27 C28 -179.0(6) . . . . ?
C26 C27 C28 N5 -0.5(11) . . . . ?
C24 N5 C28 C27 -0.5(10) . . . . ?
Ru1 N5 C28 C27 -172.0(5) . . . . ?
C25 C26 C29 C30 -4.6(12) . . . . ?
C27 C26 C29 C30 173.4(8) . . . . ?
C26 C29 C30 C31 -179.1(7) . . . . ?
C29 C30 C31 C32 -3.9(14) . . . . ?
C29 C30 C31 C35 178.0(9) . . . . ?
C35 C31 C32 C33 -1.4(15) . . . . ?
C30 C31 C32 C33 -179.5(9) . . . . ?
C34 N6 C33 C32 -3(2) . . . . ?
C31 C32 C33 N6 3(2) . . . . ?
C33 N6 C34 C35 0.6(19) . . . . ?
C32 C31 C35 C34 -0.7(14) . . . . ?
C30 C31 C35 C34 177.6(8) . . . . ?
N6 C34 C35 C31 1.2(17) . . . . ?
C41 N7 C37 C38 -0.2(7) . . . . ?
Ru1 N7 C37 C38 176.5(4) . . . . ?
N7 C37 C38 C39 -0.5(8) . . . . ?
C37 C38 C39 C40 0.7(8) . . . . ?
C37 C38 C39 C54 -177.7(5) . . . . ?
C38 C39 C40 C41 -0.2(8) . . . . ?
C54 C39 C40 C41 178.2(5) . . . . ?
C37 N7 C41 C40 0.7(7) . . . . ?
Ru1 N7 C41 C40 -176.4(4) . . . . ?
C37 N7 C41 C42 179.3(4) . . . . ?
Ru1 N7 C41 C42 2.3(5) . . . . ?
C39 C40 C41 N7 -0.5(7) . . . . ?
C39 C40 C41 C42 -179.0(5) . . . . ?
C46 N8 C42 C43 -1.5(7) . . . . ?
Ru1 N8 C42 C43 -175.4(4) . . . . ?
C46 N8 C42 C41 178.0(4) . . . . ?
Ru1 N8 C42 C41 4.1(5) . . . . ?
N7 C41 C42 C43 175.4(5) . . . . ?
C40 C41 C42 C43 -6.1(8) . . . . ?
N7 C41 C42 N8 -4.1(6) . . . . ?
C40 C41 C42 N8 174.4(4) . . . . ?
N8 C42 C43 C44 3.7(8) . . . . ?
C41 C42 C43 C44 -175.8(5) . . . . ?
C42 C43 C44 C45 -4.2(9) . . . . ?
C42 C43 C44 C47 179.6(7) . . . . ?
C42 C43 C44 C48A -178.4(11) . . . . ?
C43 C44 C45 C46 2.8(9) . . . . ?
C47 C44 C45 C46 179.6(6) . . . . ?
C48A C44 C45 C46 172.9(18) . . . . ?
C44 C45 C46 N8 -0.8(9) . . . . ?
C42 N8 C46 C45 0.1(8) . . . . ?
Ru1 N8 C46 C45 173.3(4) . . . . ?
C45 C44 C47 C48 178.4(8) . . . . ?
C43 C44 C47 C48 -5.3(14) . . . . ?
C44 C47 C48 C49 178.7(8) . . . . ?
C47 C48 C49 C50 174.4(10) . . . . ?
C47 C48 C49 C52 -6.0(15) . . . . ?
C52 C49 C50 C51 0.5(15) . . . . ?
C48 C49 C50 C51 -179.8(10) . . . . ?
C49 C50 C51 N9 -0.9(19) . . . . ?
C50 C49 C52 C53 1.0(14) . . . . ?
C48 C49 C52 C53 -178.6(10) . . . . ?
C49 C52 C53 N9 -2.4(17) . . . . ?
C50 C51 N9 C53 0(2) . . . . ?
C52 C53 N9 C51 2.0(19) . . . . ?
C51A C47A C48A C44 -178(2) . . . . ?
C45 C44 C48A C47A 14(3) . . . . ?
C43 C44 C48A C47A -175.1(18) . . . . ?
N9A C49A C50A C51A 0.0 . . . . ?
C48A C47A C51A C52A 167(2) . . . . ?
C48A C47A C51A C50A -14(3) . . . . ?
C49A C50A C51A C47A -180(3) . . . . ?
C49A C50A C51A C52A 0.0 . . . . ?
C47A C51A C52A C53A 180(3) . . . . ?
C50A C51A C52A C53A 0.0 . . . . ?
C51A C52A C53A N9A 0.0 . . . . ?
C52A C53A N9A C49A 0.0 . . . . ?
C50A C49A N9A C53A 0.0 . . . . ?
C59 N13 C55 C56 0.1(10) . . . . ?
Ru2 N13 C55 C56 -178.2(5) . . . . ?
N13 C55 C56 C57 0.1(11) . . . . ?
C55 C56 C57 C58 -0.8(10) . . . . ?
C55 C56 C57 C72 179.1(7) . . . . ?
C56 C57 C58 C59 1.2(10) . . . . ?
C72 C57 C58 C59 -178.7(6) . . . . ?
C55 N13 C59 C58 0.3(9) . . . . ?
Ru2 N13 C59 C58 178.8(5) . . . . ?
C55 N13 C59 C60 -178.9(5) . . . . ?
Ru2 N13 C59 C60 -0.4(7) . . . . ?
C57 C58 C59 N13 -1.0(10) . . . . ?
C57 C58 C59 C60 178.1(6) . . . . ?
C64 N14 C60 C61 -0.1(9) . . . . ?
Ru2 N14 C60 C61 -177.4(5) . . . . ?
C64 N14 C60 C59 179.4(6) . . . . ?
Ru2 N14 C60 C59 2.1(7) . . . . ?
N13 C59 C60 N14 -1.1(8) . . . . ?
C58 C59 C60 N14 179.7(6) . . . . ?
N13 C59 C60 C61 178.4(6) . . . . ?
C58 C59 C60 C61 -0.8(10) . . . . ?
N14 C60 C61 C62 -0.5(10) . . . . ?
C59 C60 C61 C62 -180.0(6) . . . . ?
C60 C61 C62 C63 1.2(10) . . . . ?
C60 C61 C62 C65 179.4(6) . . . . ?
C61 C62 C63 C64 -1.4(11) . . . . ?
C65 C62 C63 C64 -179.7(7) . . . . ?
C62 C63 C64 N14 0.9(12) . . . . ?
C60 N14 C64 C63 -0.1(10) . . . . ?
Ru2 N14 C64 C63 176.9(6) . . . . ?
C63 C62 C65 C66 -177.7(7) . . . . ?
C61 C62 C65 C66 4.2(12) . . . . ?
C62 C65 C66 C67 -178.7(6) . . . . ?
C65 C66 C67 C70 3.1(12) . . . . ?
C65 C66 C67 C68 179.9(7) . . . . ?
C70 C67 C68 C69 1.2(11) . . . . ?
C66 C67 C68 C69 -175.8(7) . . . . ?
C71 N15 C69 C68 0.8(12) . . . . ?
C67 C68 C69 N15 -2.0(12) . . . . ?
C68 C67 C70 C71 0.5(11) . . . . ?
C66 C67 C70 C71 177.3(7) . . . . ?
C69 N15 C71 C70 1.0(12) . . . . ?
C67 C70 C71 N15 -1.7(12) . . . . ?
C77 N10 C73 C74 2.5(9) . . . . ?
Ru2 N10 C73 C74 -176.4(5) . . . . ?
N10 C73 C74 C75 -0.2(11) . . . . ?
C73 C74 C75 C76 -1.8(11) . . . . ?
C73 C74 C75 C90 176.7(8) . . . . ?
C74 C75 C76 C77 1.4(10) . . . . ?
C90 C75 C76 C77 -177.1(7) . . . . ?
C73 N10 C77 C76 -2.9(8) . . . . ?
Ru2 N10 C77 C76 176.2(4) . . . . ?
C73 N10 C77 C78 178.0(5) . . . . ?
Ru2 N10 C77 C78 -3.0(6) . . . . ?
C75 C76 C77 N10 0.9(9) . . . . ?
C75 C76 C77 C78 180.0(6) . . . . ?
C82 N11 C78 C79 1.3(7) . . . . ?
Ru2 N11 C78 C79 -179.2(4) . . . . ?
C82 N11 C78 C77 179.7(5) . . . . ?
Ru2 N11 C78 C77 -0.8(6) . . . . ?
N10 C77 C78 N11 2.5(7) . . . . ?
C76 C77 C78 N11 -176.6(5) . . . . ?
N10 C77 C78 C79 -179.1(5) . . . . ?
C76 C77 C78 C79 1.7(8) . . . . ?
N11 C78 C79 C80 -0.5(8) . . . . ?
C77 C78 C79 C80 -178.8(5) . . . . ?
C78 C79 C80 C81 0.5(9) . . . . ?
C78 C79 C80 C83 178.0(6) . . . . ?
C79 C80 C81 C82 -1.3(9) . . . . ?
C83 C80 C81 C82 -178.9(6) . . . . ?
C78 N11 C82 C81 -2.2(8) . . . . ?
Ru2 N11 C82 C81 178.4(4) . . . . ?
C80 C81 C82 N11 2.3(9) . . . . ?
C79 C80 C83 C84 2.1(12) . . . . ?
C81 C80 C83 C84 179.5(8) . . . . ?
C80 C83 C84 C85 179.9(8) . . . . ?
C83 C84 C85 C89 12.4(18) . . . . ?
C83 C84 C85 C86 -174.4(11) . . . . ?
C89 C85 C86 C87 -4(2) . . . . ?
C84 C85 C86 C87 -177.5(12) . . . . ?
C85 C86 C87 N12 -5(3) . . . . ?
C86 C85 C89 C88 7(2) . . . . ?
C84 C85 C89 C88 -179.6(13) . . . . ?
N12 C88 C89 C85 -2(3) . . . . ?
C86 C87 N12 C88 10(3) . . . . ?
C89 C88 N12 C87 -7(3) . . . . ?
C95 N17 C91 C92 -1.9(8) . . . . ?
Ru2 N17 C91 C92 176.9(4) . . . . ?
N17 C91 C92 C93 0.1(9) . . . . ?
C91 C92 C93 C208 179(2) . . . . ?
C91 C92 C93 C94 2.2(8) . . . . ?
C91 C92 C93 C101 -176.0(9) . . . . ?
C208 C93 C94 C95 -180(2) . . . . ?
C92 C93 C94 C95 -2.7(8) . . . . ?
C101 C93 C94 C95 175.6(8) . . . . ?
C93 C94 C95 N17 0.9(8) . . . . ?
C93 C94 C95 C96 -178.6(5) . . . . ?
C91 N17 C95 C94 1.4(7) . . . . ?
Ru2 N17 C95 C94 -177.6(4) . . . . ?
C91 N17 C95 C96 -179.0(5) . . . . ?
Ru2 N17 C95 C96 2.0(5) . . . . ?
C100 N16 C96 C97 1.7(7) . . . . ?
Ru2 N16 C96 C97 -179.7(4) . . . . ?
C100 N16 C96 C95 -177.8(4) . . . . ?
Ru2 N16 C96 C95 0.8(5) . . . . ?
C94 C95 C96 N16 177.7(5) . . . . ?
N17 C95 C96 N16 -1.9(6) . . . . ?
C94 C95 C96 C97 -1.7(8) . . . . ?
N17 C95 C96 C97 178.7(4) . . . . ?
N16 C96 C97 C98 0.8(8) . . . . ?
C95 C96 C97 C98 -179.8(5) . . . . ?
C96 C97 C98 C99 -1.8(8) . . . . ?
C96 C97 C98 C108 -179.3(7) . . . . ?
C96 C97 C98 C201 168.7(14) . . . . ?
C97 C98 C99 C100 0.4(9) . . . . ?
C108 C98 C99 C100 177.6(8) . . . . ?
C201 C98 C99 C100 -171.2(13) . . . . ?
C98 C99 C100 N16 2.1(9) . . . . ?
C96 N16 C100 C99 -3.1(7) . . . . ?
Ru2 N16 C100 C99 178.4(4) . . . . ?
C92 C93 C101 C102 9.1(19) . . . . ?
C94 C93 C101 C102 -169.1(12) . . . . ?
C93 C101 C102 C103 179.1(10) . . . . ?
C101 C102 C103 C107 -170.5(12) . . . . ?
C101 C102 C103 C104 8.7(17) . . . . ?
C107 C103 C104 C105 1.2(15) . . . . ?
C102 C103 C104 C105 -178.1(11) . . . . ?
C103 C104 C105 N18 -4(2) . . . . ?
C104 C103 C107 C106 2.9(14) . . . . ?
C102 C103 C107 C106 -177.8(9) . . . . ?
N18 C106 C107 C103 -4.8(18) . . . . ?
C104 C105 N18 C106 3(2) . . . . ?
C107 C106 N18 C105 2(2) . . . . ?
C99 C98 C201 C202 -1(4) . . . . ?
C97 C98 C201 C202 -172(3) . . . . ?
C98 C201 C202 C203 -173(2) . . . . ?
C201 C202 C203 C204 25(3) . . . . ?
C201 C202 C203 C206 -156(3) . . . . ?
C206 C203 C204 C205 0.0 . . . . ?
C202 C203 C204 C205 179.1(14) . . . . ?
C203 C204 C205 N18A 0.0 . . . . ?
C204 C205 N18A C207 0.0 . . . . ?
C205 N18A C207 C206 0.0 . . . . ?
N18A C207 C206 C203 0.0 . . . . ?
C204 C203 C206 C207 0.0 . . . . ?
C202 C203 C206 C207 -179.2(14) . . . . ?
 
_refine_diff_density_max    2.242
_refine_diff_density_min   -0.559
_refine_diff_density_rms    0.106

_shelx_res_file
;

    v228a_sq.res created by SHELXL-2014/7


TITL v228_a.res in P-1
REM Old TITL v228 in P-1 #2
REM SHELXT solution in P-1
REM R1 0.275, Rweak 0.007, Alpha 0.079, Orientation as input
REM Formula found by SHELXT: C100 N22 F28 P3 Ru2
CELL 1.54184 15.290545 21.293602 21.93944 73.6996 77.0624 79.2781
ZERR 4 0.000222 0.000436 0.000483 0.0019 0.0015 0.0015
LATT 1
SFAC C H N F P Ru
UNIT 216 180 36 48 8 4

L.S. 24
PLAN  -50
TEMP -173.15
BOND $H
FMAP 2
MORE -1
CONF
ACTA
REM Hodaya red chunk
SHEL 8.0 0.84
SIZE 0.30 0.10 0.05
SIMU 0.02 C85 C86 C87 C88 C89 N12
REM SIMU C32 C33 C34 C35
REM EADP C89A C86A
REM EADP C88A C87A
ABIN
OMIT 1 -2 1
OMIT 3 2 0
OMIT -1 2 0
OMIT 0 -1 6
OMIT 1 -1 3
OMIT 1 1 3
OMIT -1 -5 4
OMIT -2 2 4
OMIT -2 -2 2
OMIT 1 2 4
OMIT -2 4 2
OMIT 3 -1 6
WPDB -2
WGHT    0.165100    4.084200
FVAR       0.53874   0.67151   0.83143   0.95494   0.74574   0.74066
RU1   6    0.703656    0.619485    0.606390    11.00000    0.04516    0.08806 =
         0.06022   -0.03895   -0.01666   -0.00288
N1    3    0.671893    0.566568    0.550698    11.00000    0.04392    0.08536 =
         0.05558   -0.03106   -0.01217   -0.00459
N2    3    0.686948    0.692784    0.525085    11.00000    0.04832    0.08693 =
         0.06435   -0.03504   -0.01420   -0.00945
N3    3    0.576405    0.982717    0.130635    11.00000    0.07907    0.07703 =
         0.09277   -0.03264   -0.03908    0.00675
N4    3    0.722400    0.679093    0.660049    11.00000    0.04777    0.07702 =
         0.05018   -0.02418   -0.01344   -0.00616
N5    3    0.573552    0.650649    0.643203    11.00000    0.04911    0.08471 =
         0.06663   -0.03519   -0.01899   -0.00594
N6    3    0.008342    0.860020    0.808251    11.00000    0.08221    0.14137 =
         0.27303   -0.04013    0.03550    0.02603
N7    3    0.839192    0.589676    0.578049    11.00000    0.05133    0.09174 =
         0.05629   -0.03652   -0.01701   -0.00973
N8    3    0.726413    0.538216    0.680355    11.00000    0.04566    0.07966 =
         0.05714   -0.02976   -0.01395   -0.01041
C1    1    0.662050    0.502118    0.567067    11.00000    0.05659    0.08564 =
         0.06204   -0.03131   -0.01716   -0.00819
AFIX  43
H1    2    0.670607    0.476884    0.609001    11.00000   -1.20000
AFIX   0
C2    1    0.640744    0.471159    0.527480    11.00000    0.05362    0.10296 =
         0.08365   -0.04857   -0.01171   -0.01101
AFIX  43
H2    2    0.634643    0.425476    0.541500    11.00000   -1.20000
AFIX   0
C3    1    0.627826    0.507228    0.465710    11.00000    0.05687    0.11073 =
         0.07762   -0.05147   -0.01877   -0.01111
C4    1    0.634796    0.573554    0.448373    11.00000    0.05736    0.09899 =
         0.06606   -0.03993   -0.02017   -0.00808
AFIX  43
H4    2    0.624690    0.599489    0.406998    11.00000   -1.20000
AFIX   0
C5    1    0.656408    0.602478    0.490887    11.00000    0.03987    0.10144 =
         0.06059   -0.03844   -0.01394   -0.00022
C6    1    0.663473    0.674041    0.476777    11.00000    0.04708    0.09160 =
         0.05705   -0.03019   -0.01511   -0.00578
C7    1    0.645819    0.721364    0.420273    11.00000    0.05319    0.11933 =
         0.06856   -0.04430   -0.02173    0.00031
AFIX  43
H7    2    0.629964    0.708181    0.386673    11.00000   -1.20000
AFIX   0
C8    1    0.651449    0.786761    0.413509    11.00000    0.06349    0.08031 =
         0.09394   -0.02255   -0.02292   -0.00577
C9    1    0.675657    0.804622    0.462038    11.00000    0.08820    0.09300 =
         0.08739   -0.02739   -0.03132   -0.01624
AFIX  43
H9    2    0.680161    0.849419    0.458646    11.00000   -1.20000
AFIX   0
C10   1    0.693412    0.755711    0.516200    11.00000    0.07518    0.08878 =
         0.07160   -0.03126   -0.02291   -0.00859
AFIX  43
H10   2    0.711508    0.768362    0.549259    11.00000   -1.20000
AFIX   0
C11   1    0.632658    0.839698    0.355254    11.00000    0.08779    0.09875 =
         0.10112   -0.04775   -0.02970   -0.00820
AFIX  43
H11   2    0.638321    0.883481    0.354910    11.00000   -1.20000
AFIX   0
C12   1    0.609648    0.831612    0.305766    11.00000    0.07680    0.10359 =
         0.09883   -0.04674   -0.02590   -0.00161
AFIX  43
H12   2    0.601716    0.788235    0.306339    11.00000   -1.20000
AFIX   0
C13   1    0.594177    0.885696    0.246636    11.00000    0.07023    0.08089 =
         0.08105   -0.02950   -0.02665    0.01124
C14   1    0.579116    0.870047    0.194388    11.00000    0.06319    0.08202 =
         0.08201   -0.03119   -0.02716    0.01042
AFIX  43
H14   2    0.574388    0.825626    0.196398    11.00000   -1.20000
AFIX   0
C15   1    0.570692    0.918230    0.138636    11.00000    0.06795    0.08506 =
         0.08601   -0.04072   -0.03085    0.00767
AFIX  43
H15   2    0.560084    0.905339    0.103108    11.00000   -1.20000
AFIX   0
C16   1    0.590206    0.998634    0.182199    11.00000    0.10785    0.08857 =
         0.10869   -0.04935   -0.05569    0.01022
AFIX  43
H16   2    0.593719    1.043533    0.179092    11.00000   -1.20000
AFIX   0
C17   1    0.599740    0.951950    0.240744    11.00000    0.10304    0.11357 =
         0.08699   -0.04549   -0.04660    0.00793
AFIX  43
H17   2    0.609908    0.965342    0.276116    11.00000   -1.20000
AFIX   0
C18   1    0.607363    0.473388    0.419375    11.00000    0.10362    0.12602 =
         0.10693   -0.06675   -0.03089   -0.02180
AFIX 137
H18A  2    0.558265    0.500531    0.398059    11.00000   -1.50000
H18B  2    0.588958    0.430165    0.443250    11.00000   -1.50000
H18C  2    0.661610    0.467543    0.386798    11.00000   -1.50000
AFIX   0
C19   1    0.802290    0.691010    0.667285    11.00000    0.05206    0.09611 =
         0.06523   -0.03818   -0.01477   -0.00779
AFIX  43
H19   2    0.856373    0.669202    0.647199    11.00000   -1.20000
AFIX   0
C20   1    0.808875    0.733352    0.702469    11.00000    0.05460    0.09511 =
         0.08368   -0.04241   -0.02217   -0.01329
AFIX  43
H20   2    0.866848    0.741016    0.705452    11.00000   -1.20000
AFIX   0
C21   1    0.731749    0.765070    0.733719    11.00000    0.07152    0.08627 =
         0.07076   -0.03445   -0.02020   -0.01515
C22   1    0.648877    0.751662    0.727787    11.00000    0.06356    0.07311 =
         0.06643   -0.03201   -0.01626   -0.00311
AFIX  43
H22   2    0.594330    0.771220    0.749627    11.00000   -1.20000
AFIX   0
C23   1    0.645395    0.710148    0.690394    11.00000    0.05494    0.07294 =
         0.05840   -0.02510   -0.01763   -0.00838
C24   1    0.561318    0.695424    0.679054    11.00000    0.05060    0.07526 =
         0.05753   -0.02440   -0.01665   -0.00109
C25   1    0.475540    0.723910    0.702839    11.00000    0.05464    0.07911 =
         0.07413   -0.03082   -0.01865    0.00439
AFIX  43
H25   2    0.469040    0.752634    0.730242    11.00000   -1.20000
AFIX   0
C26   1    0.399577    0.710543    0.686711    11.00000    0.05007    0.08851 =
         0.07492   -0.02279   -0.01503    0.00069
C27   1    0.412959    0.665608    0.649323    11.00000    0.04765    0.11525 =
         0.09792   -0.04864   -0.01855   -0.00613
AFIX  43
H27   2    0.362609    0.654533    0.637703    11.00000   -1.20000
AFIX   0
C28   1    0.497600    0.637524    0.629375    11.00000    0.04726    0.11007 =
         0.08717   -0.04909   -0.01617   -0.01430
AFIX  43
H28   2    0.504352    0.606687    0.604111    11.00000   -1.20000
AFIX   0
C29   1    0.306792    0.739081    0.708271    11.00000    0.05498    0.10023 =
         0.09901   -0.02762   -0.01393    0.00316
AFIX  43
H29   2    0.260656    0.728755    0.691432    11.00000   -1.20000
AFIX   0
C30   1    0.281838    0.775524    0.746410    11.00000    0.07418    0.10236 =
         0.09692   -0.02558   -0.01619    0.00693
AFIX  43
H30   2    0.327686    0.786581    0.762976    11.00000   -1.20000
AFIX   0
C31   1    0.186087    0.803462    0.768486    11.00000    0.05918    0.10362 =
         0.13684   -0.00898   -0.00799    0.00733
C32   1    0.117103    0.794385    0.745720    11.00000    0.07485    0.12549 =
         0.17506   -0.03684   -0.01919    0.00636
AFIX  43
H32   2    0.126657    0.769325    0.714617    11.00000   -1.20000
AFIX   0
C33   1    0.028248    0.823191    0.769108    11.00000    0.06627    0.16064 =
         0.28026   -0.01892    0.01745    0.00443
AFIX  43
H33   2   -0.020442    0.813998    0.754046    11.00000   -1.20000
AFIX   0
C34   1    0.081335    0.867781    0.829313    11.00000    0.11535    0.11560 =
         0.20906   -0.01826    0.04549    0.02449
AFIX  43
H34   2    0.071203    0.894432    0.859077    11.00000   -1.20000
AFIX   0
C35   1    0.168670    0.840524    0.811436    11.00000    0.09124    0.10925 =
         0.14626   -0.03488    0.00202    0.02928
AFIX  43
H35   2    0.216180    0.847707    0.829119    11.00000   -1.20000
AFIX   0
C36   1    0.737610    0.812790    0.772051    11.00000    0.07994    0.09776 =
         0.09209   -0.05573   -0.01864   -0.01270
AFIX 137
H36A  2    0.748693    0.855706    0.742476    11.00000   -1.50000
H36B  2    0.787368    0.795530    0.796147    11.00000   -1.50000
H36C  2    0.680559    0.818002    0.802328    11.00000   -1.50000
AFIX   0
C37   1    0.894182    0.620465    0.525843    11.00000    0.05965    0.10515 =
         0.06059   -0.04243   -0.01069   -0.01308
AFIX  43
H37   2    0.869062    0.658496    0.497312    11.00000   -1.20000
AFIX   0
C38   1    0.984563    0.599523    0.511975    11.00000    0.05582    0.11522 =
         0.06469   -0.04815   -0.00666   -0.01096
AFIX  43
H38   2    1.020456    0.622882    0.474178    11.00000   -1.20000
AFIX   0
C39   1    1.024552    0.544966    0.552008    11.00000    0.05307    0.11269 =
         0.07886   -0.05924   -0.01552   -0.00330
C40   1    0.967740    0.512675    0.606113    11.00000    0.05065    0.09195 =
         0.07734   -0.04626   -0.02581    0.00373
AFIX  43
H40   2    0.992291    0.474701    0.635008    11.00000   -1.20000
AFIX   0
C41   1    0.876849    0.534755    0.618438    11.00000    0.04951    0.09449 =
         0.06829   -0.04751   -0.01881   -0.00578
C42   1    0.812101    0.503863    0.675463    11.00000    0.05485    0.08697 =
         0.06878   -0.04187   -0.01977   -0.00100
C43   1    0.832702    0.446785    0.719504    11.00000    0.08131    0.09708 =
         0.07755   -0.03727   -0.03646    0.00913
AFIX  43
H43   2    0.893332    0.425474    0.716325    11.00000   -1.20000
AFIX   0
C44   1    0.765468    0.418783    0.769780    11.00000    0.10874    0.09822 =
         0.07140   -0.02847   -0.03121   -0.01285
C45   1    0.678906    0.454375    0.774784    11.00000    0.08240    0.10386 =
         0.06967   -0.02610   -0.01516   -0.02340
AFIX  43
H45   2    0.631770    0.438575    0.809007    11.00000   -1.20000
AFIX   0
C46   1    0.662985    0.511789    0.730161    11.00000    0.05262    0.09318 =
         0.07201   -0.03760   -0.00474   -0.02005
AFIX  43
H46   2    0.603435    0.535026    0.734068    11.00000   -1.20000
AFIX   0
PART 1
C47   1    0.773471    0.355886    0.823296    51.00000    0.05843    0.13355 =
         0.09195   -0.04488   -0.00558   -0.01642
AFIX  43
H47   2    0.722697    0.344957    0.856319    51.00000   -1.20000
AFIX   0
C48   1    0.847589    0.318186    0.823849    51.00000    0.05968    0.10910 =
         0.08192   -0.03624   -0.00434   -0.02014
AFIX  43
H48   2    0.897129    0.329609    0.789874    51.00000   -1.20000
AFIX   0
C49   1    0.860752    0.256248    0.875754    51.00000    0.06883    0.12112 =
         0.07112   -0.03602   -0.01092   -0.01457
C50   1    0.937544    0.214643    0.872218    51.00000    0.08829    0.10818 =
         0.07266   -0.04352   -0.02303    0.00811
AFIX  43
H50   2    0.984808    0.224650    0.836068    51.00000   -1.20000
AFIX   0
C51   1    0.950056    0.156063    0.921057    51.00000    0.11705    0.08390 =
         0.07797   -0.01718   -0.01717   -0.01338
AFIX  43
H51   2    1.005745    0.127935    0.915717    51.00000   -1.20000
AFIX   0
C52   1    0.795560    0.240121    0.928525    51.00000    0.05956    0.11758 =
         0.11233   -0.03149   -0.02483   -0.02045
AFIX  43
H52   2    0.739259    0.267714    0.933068    51.00000   -1.20000
AFIX   0
C53   1    0.812388    0.182454    0.976006    51.00000    0.10017    0.16702 =
         0.08079   -0.05199    0.01630   -0.06622
AFIX  43
H53   2    0.766581    0.173165    1.013271    51.00000   -1.20000
AFIX   0
N9    3    0.890033    0.137901    0.973229    51.00000    0.09227    0.15559 =
         0.08986   -0.03307   -0.01626   -0.00165
PART 2
C47A  1    0.781489    0.310862    0.858483   -51.00000    0.06505
AFIX  43
H47A  2    0.717334    0.319191    0.868425   -51.00000   -1.20000
AFIX   0
C48A  1    0.826524    0.358514    0.804112   -51.00000    0.06695
AFIX  43
H48A  2    0.890345    0.352847    0.790393   -51.00000   -1.20000
AFIX  66
C49A  1    0.947629    0.176416    0.917530   -51.00000    0.06163
AFIX  43
H49A  2    1.009128    0.159084    0.905804   -51.00000   -1.20000
AFIX  65
C50A  1    0.909760    0.232993    0.877504   -51.00000    0.08110
AFIX  43
H50A  2    0.945377    0.254330    0.838422   -51.00000   -1.20000
AFIX  65
C51A  1    0.819777    0.258353    0.894662   -51.00000    0.08101
C52A  1    0.767664    0.227135    0.951844   -51.00000    0.06527
AFIX  43
H52A  2    0.706165    0.244468    0.963570   -51.00000   -1.20000
AFIX  65
C53A  1    0.805532    0.170557    0.991871   -51.00000    0.06721
AFIX  43
H53A  2    0.769914    0.149222    1.030953   -51.00000   -1.20000
AFIX  65
N9A   3    0.895514    0.145197    0.974714   -51.00000    0.05665
AFIX   0
PART 0
C54   1    1.123932    0.523300    0.538355    11.00000    0.05171    0.12353 =
         0.10131   -0.06102   -0.00774    0.00351
AFIX 137
H54A  2    1.153926    0.538827    0.565408    11.00000   -1.50000
H54B  2    1.147954    0.541833    0.492724    11.00000   -1.50000
H54C  2    1.135213    0.475003    0.547963    11.00000   -1.50000
AFIX   0
RU2   6    0.760688    0.777557    1.000749    11.00000    0.05462    0.08818 =
         0.07624   -0.04229   -0.02809    0.00997
N10   3    0.769411    0.704512    1.084469    11.00000    0.05872    0.08599 =
         0.07751   -0.03350   -0.02614    0.00692
N11   3    0.783115    0.830022    1.060066    11.00000    0.05410    0.08019 =
         0.06892   -0.02896   -0.02669    0.00911
N13   3    0.748130    0.717766    0.945138    11.00000    0.06294    0.07902 =
         0.07269   -0.03003   -0.03048    0.00542
N14   3    0.893031    0.747290    0.967187    11.00000    0.05768    0.08485 =
         0.07950   -0.03429   -0.03120    0.00659
N15   3    1.465656    0.548690    0.801515    11.00000    0.05847    0.09992 =
         0.12473   -0.05087    0.00045   -0.01041
N16   3    0.742134    0.857449    0.924926    11.00000    0.04737    0.09080 =
         0.07286   -0.04681   -0.02376    0.00470
N17   3    0.624590    0.807440    1.024879    11.00000    0.05966    0.07885 =
         0.07303   -0.03339   -0.02306   -0.00152
C55   1    0.670723    0.704361    0.936320    11.00000    0.06421    0.09461 =
         0.08601   -0.04569   -0.02833    0.00482
AFIX  43
H55   2    0.615248    0.724757    0.956232    11.00000   -1.20000
AFIX   0
C56   1    0.667892    0.662228    0.899589    11.00000    0.07680    0.10269 =
         0.09928   -0.04659   -0.04060    0.00338
AFIX  43
H56   2    0.611139    0.654226    0.894573    11.00000   -1.20000
AFIX   0
C57   1    0.747469    0.631315    0.869791    11.00000    0.08588    0.08091 =
         0.07835   -0.03344   -0.03664    0.00215
C58   1    0.827135    0.645628    0.878347    11.00000    0.07828    0.08714 =
         0.07315   -0.04017   -0.02837    0.00998
AFIX  43
H58   2    0.883096    0.626161    0.858101    11.00000   -1.20000
AFIX   0
C59   1    0.827163    0.687903    0.915946    11.00000    0.06321    0.07440 =
         0.06932   -0.03052   -0.02775    0.01182
C60   1    0.909274    0.704252    0.929082    11.00000    0.06070    0.08127 =
         0.06947   -0.03040   -0.02650    0.01289
C61   1    0.996201    0.678527    0.905819    11.00000    0.06612    0.08912 =
         0.07264   -0.03352   -0.02106    0.01109
AFIX  43
H61   2    1.005341    0.648321    0.879595    11.00000   -1.20000
AFIX   0
C62   1    1.070883    0.696669    0.920627    11.00000    0.05568    0.10087 =
         0.08672   -0.02966   -0.02454    0.01127
C63   1    1.052745    0.740186    0.960369    11.00000    0.06026    0.10661 =
         0.10792   -0.05175   -0.03376    0.00626
AFIX  43
H63   2    1.101098    0.753223    0.972590    11.00000   -1.20000
AFIX   0
C64   1    0.966776    0.763590    0.981296    11.00000    0.06020    0.10943 =
         0.10038   -0.05288   -0.03328    0.00500
AFIX  43
H64   2    0.956743    0.793616    1.007794    11.00000   -1.20000
AFIX   0
C65   1    1.165740    0.671945    0.899009    11.00000    0.06262    0.09823 =
         0.10346   -0.04293   -0.02426    0.00241
AFIX  43
H65   2    1.210905    0.685329    0.914348    11.00000   -1.20000
AFIX   0
C66   1    1.191978    0.633271    0.860593    11.00000    0.07403    0.08846 =
         0.09744   -0.03667   -0.02801   -0.00321
AFIX  43
H66   2    1.146883    0.620632    0.844556    11.00000   -1.20000
AFIX   0
C67   1    1.288668    0.606919    0.839527    11.00000    0.06324    0.08355 =
         0.09350   -0.02406   -0.01122   -0.01146
C68   1    1.306741    0.566096    0.798458    11.00000    0.06136    0.09081 =
         0.10918   -0.03415   -0.00559   -0.00836
AFIX  43
H68   2    1.259406    0.557344    0.781663    11.00000   -1.20000
AFIX   0
C69   1    1.394123    0.538140    0.782033    11.00000    0.07851    0.08611 =
         0.13221   -0.04461    0.00516   -0.01898
AFIX  43
H69   2    1.404647    0.508960    0.754634    11.00000   -1.20000
AFIX   0
C70   1    1.359236    0.618653    0.861150    11.00000    0.08768    0.08891 =
         0.09303   -0.03769   -0.00684    0.00017
AFIX  43
H70   2    1.349547    0.646356    0.889906    11.00000   -1.20000
AFIX   0
C71   1    1.447178    0.588901    0.840074    11.00000    0.06735    0.09897 =
         0.12494   -0.04692   -0.00877   -0.00891
AFIX  43
H71   2    1.496125    0.598452    0.854584    11.00000   -1.20000
AFIX   0
C72   1    0.744444    0.584767    0.830641    11.00000    0.11415    0.09810 =
         0.09442   -0.05038   -0.03984   -0.00238
AFIX 137
H72A  2    0.804995    0.574926    0.806016    11.00000   -1.50000
H72B  2    0.702172    0.605076    0.800786    11.00000   -1.50000
H72C  2    0.724181    0.543786    0.859459    11.00000   -1.50000
AFIX   0
C73   1    0.762764    0.640661    1.093051    11.00000    0.08169    0.08585 =
         0.09954   -0.04323   -0.03058    0.00639
AFIX  43
H73   2    0.756658    0.626044    1.057274    11.00000   -1.20000
AFIX   0
C74   1    0.764434    0.595414    1.151665    11.00000    0.09580    0.08752 =
         0.09937   -0.02080   -0.03802   -0.00090
AFIX  43
H74   2    0.759332    0.550544    1.155871    11.00000   -1.20000
AFIX   0
C75   1    0.773677    0.615654    1.205144    11.00000    0.08642    0.10179 =
         0.09039   -0.02194   -0.02885   -0.00232
C76   1    0.783397    0.681626    1.195438    11.00000    0.06463    0.11307 =
         0.08470   -0.03690   -0.02403    0.00150
AFIX  43
H76   2    0.791215    0.697068    1.230257    11.00000   -1.20000
AFIX   0
C77   1    0.781723    0.724621    1.135526    11.00000    0.05157    0.09380 =
         0.07249   -0.03089   -0.02205    0.00491
C78   1    0.791389    0.794356    1.121329    11.00000    0.04707    0.09431 =
         0.07396   -0.03590   -0.02343    0.00598
C79   1    0.805729    0.824374    1.166680    11.00000    0.05739    0.11504 =
         0.07454   -0.04327   -0.02297    0.00271
AFIX  43
H79   2    0.810780    0.798625    1.209094    11.00000   -1.20000
AFIX   0
C80   1    0.812618    0.890751    1.150644    11.00000    0.07322    0.10807 =
         0.07742   -0.04462   -0.02188   -0.00525
C81   1    0.804037    0.926277    1.088416    11.00000    0.07467    0.09466 =
         0.08384   -0.03854   -0.03128    0.00357
AFIX  43
H81   2    0.807032    0.972421    1.075455    11.00000   -1.20000
AFIX   0
C82   1    0.790937    0.893504    1.044966    11.00000    0.06553    0.09722 =
         0.06876   -0.03534   -0.03247    0.00736
AFIX  43
H82   2    0.787443    0.918321    1.002018    11.00000   -1.20000
AFIX   0
C83   1    0.824817    0.924486    1.197805    11.00000    0.11557    0.11126 =
         0.08474   -0.03861   -0.03582   -0.01801
AFIX  43
H83   2    0.826870    0.970697    1.182883    11.00000   -1.20000
AFIX   0
C84   1    0.833088    0.897651    1.257823    11.00000    0.09909    0.12247 =
         0.08238   -0.04352   -0.01865   -0.03467
AFIX  43
H84   2    0.830908    0.851457    1.272806    11.00000   -1.20000
AFIX   0
C85   1    0.845360    0.931173    1.304467    11.00000    0.21935    0.11959 =
         0.08261   -0.02417   -0.04297   -0.07603
C86   1    0.860550    0.897982    1.363420    11.00000    0.26542    0.11710 =
         0.08938   -0.02760   -0.07083   -0.05922
AFIX  43
H86   2    0.865846    0.851152    1.374805    11.00000   -1.20000
AFIX   0
C87   1    0.868702    0.929739    1.407954    11.00000    0.35940    0.13242 =
         0.10704   -0.02113   -0.09418   -0.08709
AFIX  43
H87   2    0.874649    0.904144    1.450269    11.00000   -1.20000
AFIX   0
C88   1    0.846982    1.025147    1.340714    11.00000    0.45396    0.13440 =
         0.13177   -0.02633   -0.11240   -0.08729
AFIX  43
H88   2    0.839679    1.071945    1.331715    11.00000   -1.20000
AFIX   0
C89   1    0.833304    0.996817    1.293537    11.00000    0.35853    0.11962 =
         0.10521   -0.02539   -0.07987   -0.07629
AFIX  43
H89   2    0.815802    1.023875    1.254586    11.00000   -1.20000
AFIX   0
N12   3    0.868670    0.992205    1.395163    11.00000    0.44273    0.14293 =
         0.12282   -0.03291   -0.12565   -0.09326
C90   1    0.770825    0.568052    1.271507    11.00000    0.17924    0.11942 =
         0.09675   -0.01810   -0.04205   -0.00898
AFIX 137
H90A  2    0.829584    0.562185    1.284670    11.00000   -1.50000
H90B  2    0.757492    0.525350    1.269860    11.00000   -1.50000
H90C  2    0.723559    0.585921    1.302794    11.00000   -1.50000
AFIX   0
C91   1    0.566679    0.780028    1.076907    11.00000    0.07038    0.08492 =
         0.07703   -0.03443   -0.02650    0.00462
AFIX  43
H91   2    0.588536    0.741014    1.105939    11.00000   -1.20000
AFIX   0
C92   1    0.477351    0.805543    1.090315    11.00000    0.06744    0.09358 =
         0.07941   -0.04242   -0.01912   -0.00552
AFIX  43
H92   2    0.439132    0.784176    1.127960    11.00000   -1.20000
AFIX   0
C93   1    0.442423    0.862495    1.049128    11.00000    0.05303    0.09142 =
         0.08581   -0.05322   -0.01861    0.00263
C94   1    0.501383    0.889903    0.993692    11.00000    0.05605    0.08325 =
         0.07893   -0.04452   -0.02435    0.00366
AFIX  43
H94   2    0.479680    0.927735    0.963267    11.00000   -1.20000
AFIX   0
C95   1    0.590315    0.862988    0.982479    11.00000    0.05611    0.07763 =
         0.07426   -0.03917   -0.02539   -0.00067
C96   1    0.656705    0.889778    0.926172    11.00000    0.05135    0.07521 =
         0.07421   -0.04045   -0.02581    0.00365
C97   1    0.636375    0.944331    0.877154    11.00000    0.05080    0.08491 =
         0.08458   -0.04374   -0.02036    0.00045
AFIX  43
H97   2    0.576193    0.966447    0.879387    11.00000   -1.20000
AFIX   0
C98   1    0.702072    0.967149    0.825070    11.00000    0.06938    0.08485 =
         0.08308   -0.03919   -0.02366   -0.00378
C99   1    0.787287    0.933695    0.826484    11.00000    0.06359    0.10206 =
         0.08075   -0.04404   -0.01662   -0.01017
AFIX  43
H99   2    0.834583    0.947957    0.791682    11.00000   -1.20000
AFIX   0
C100  1    0.807511    0.881386    0.874916    11.00000    0.05410    0.09200 =
         0.08267   -0.04945   -0.02732    0.00636
AFIX  43
H100  2    0.868403    0.860959    0.874054    11.00000   -1.20000
AFIX   0
PART 3
C101  1    0.344771    0.897163    1.062382    21.00000    0.04143    0.11623 =
         0.10214   -0.07229   -0.01377    0.01245
AFIX  43
H101  2    0.323683    0.931976    1.028978    21.00000   -1.20000
AFIX   0
C102  1    0.293108    0.881921    1.113962    21.00000    0.07402    0.10459 =
         0.09831   -0.05427   -0.02294   -0.00380
AFIX  43
H102  2    0.313210    0.846755    1.147483    21.00000   -1.20000
AFIX   0
C103  1    0.199830    0.917015    1.125442    21.00000    0.05721    0.11431 =
         0.16404   -0.07820   -0.01853   -0.01663
C104  1    0.159307    0.965671    1.073152    21.00000    0.08633    0.08867 =
         0.09699   -0.01727   -0.02002   -0.02940
AFIX  43
H104  2    0.191827    0.974805    1.030021    21.00000   -1.20000
AFIX   0
C105  1    0.079354    0.995233    1.087322    21.00000    0.08166    0.09198 =
         0.17113   -0.01224   -0.02165   -0.00461
AFIX  43
H105  2    0.056297    1.028479    1.053609    21.00000   -1.20000
AFIX   0
C106  1    0.059844    0.938881    1.192508    21.00000    0.06902    0.13121 =
         0.14891   -0.06594   -0.01217   -0.00397
AFIX  43
H106  2    0.020741    0.929416    1.233282    21.00000   -1.20000
AFIX   0
C107  1    0.148405    0.904737    1.187480    21.00000    0.07277    0.09467 =
         0.10128   -0.04733   -0.01601   -0.01282
AFIX  43
H107  2    0.171219    0.875610    1.223625    21.00000   -1.20000
AFIX   0
N18   3    0.026824    0.983838    1.143753    21.00000    0.09719    0.11010 =
         0.20046   -0.06960   -0.01953    0.01000
C108  1    0.676008    1.024556    0.776435    21.00000    0.07212    0.09559 =
         0.06369   -0.04324   -0.00963   -0.00621
AFIX 137
H10A  2    0.730263    1.040171    0.746853    21.00000   -1.50000
H10B  2    0.642816    1.059435    0.797098    21.00000   -1.50000
H10C  2    0.637187    1.013179    0.752216    21.00000   -1.50000
AFIX   0
PART 4
C201  1    0.686812    1.021660    0.758489   -21.00000    0.07309
AFIX  43
H201  2    0.626694    1.043504    0.758422   -21.00000   -1.20000
AFIX   0
C202  1    0.731282    1.036177    0.716841   -21.00000    0.06660
AFIX  43
H202  2    0.790573    1.012588    0.712218   -21.00000   -1.20000
AFIX  66
C203  1    0.707352    1.093336    0.662234   -21.00000    0.08006
C204  1    0.639282    1.144849    0.671385   -21.00000    0.09087
AFIX  43
H204  2    0.605198    1.144546    0.713353   -21.00000   -1.20000
AFIX  65
C205  1    0.621082    1.196806    0.619130   -21.00000    0.09708
AFIX  43
H205  2    0.574559    1.232013    0.625384   -21.00000   -1.20000
AFIX  65
N18A  3    0.670953    1.197249    0.557723   -21.00000    0.14066
C207  1    0.739023    1.145735    0.548572   -21.00000    0.15699
AFIX  43
H207  2    0.773106    1.146038    0.506603   -21.00000   -1.20000
AFIX  65
C206  1    0.757223    1.093778    0.600827   -21.00000    0.12104
AFIX  43
H206  2    0.803746    1.058571    0.594572   -21.00000   -1.20000
AFIX   0
C208  1    0.360399    0.890377    1.056181   -21.00000    0.07094
AFIX 137
H20A  2    0.322969    0.861554    1.091043   -21.00000   -1.50000
H20B  2    0.337768    0.898524    1.015874   -21.00000   -1.50000
H20C  2    0.357633    0.932408    1.067028   -21.00000   -1.50000
AFIX   0
PART 0
P1    5    1.051980    0.612078    0.715774    11.00000    0.09166    0.22342 =
         0.15547   -0.13057   -0.06400    0.03304
F6    4    1.098508    0.562891    0.675092    11.00000    0.16303    0.27145 =
         0.23341   -0.18777   -0.12465    0.09405
F1    4    1.143382    0.642128    0.699876    11.00000    0.08221    0.30753 =
         0.20296   -0.14141   -0.03803   -0.01101
F2    4    1.081418    0.564709    0.779895    11.00000    0.17320    0.21927 =
         0.18962   -0.09498   -0.10374   -0.01139
F3    4    1.006935    0.665200    0.754348    11.00000    0.10532    0.20803 =
         0.15012   -0.11223   -0.02316   -0.01519
F4    4    0.958447    0.584532    0.732351    11.00000    0.12885    0.18093 =
         0.20718   -0.08882   -0.07634   -0.00684
F5    4    1.020682    0.662099    0.651442    11.00000    0.08409    0.27063 =
         0.14255   -0.08898   -0.04315    0.02070
P2    5    0.924658    0.695079    1.333903    11.00000    0.07013    0.12681 =
         0.06300   -0.03262   -0.01858    0.00922
F7    4    0.972294    0.756495    1.287436    11.00000    0.08573    0.15542 =
         0.08687   -0.02013   -0.01564   -0.01163
F8    4    0.945512    0.660640    1.275321    11.00000    0.06793    0.18489 =
         0.07719   -0.06655   -0.01955    0.01136
F9    4    0.829312    0.729771    1.314358    11.00000    0.06893    0.14501 =
         0.07124   -0.02590   -0.01411    0.01226
F10   4    0.877383    0.634285    1.379608    11.00000    0.09652    0.11699 =
         0.07845   -0.03587   -0.01973    0.00345
F11   4    0.904760    0.730240    1.391537    11.00000    0.11291    0.10755 =
         0.06888   -0.02898   -0.02074    0.00652
F12   4    1.019564    0.659981    1.353594    11.00000    0.07986    0.13968 =
         0.09569   -0.04943   -0.04034    0.01935
P3    5    0.484840    0.665028    1.274518    11.00000    0.10511    0.10120 =
         0.10487   -0.03129   -0.03709   -0.02392
PART 9
F13   4    0.565362    0.698436    1.224703    61.00000    0.12235    0.13171 =
         0.20640   -0.00939    0.01560   -0.00303
F14   4    0.519673    0.669533    1.332398    61.00000    0.26868    0.13458 =
         0.18258   -0.05532   -0.17972    0.01461
F16   4    0.393608    0.640264    1.313501    61.00000    0.14925    0.19922 =
         0.18830    0.03050   -0.04755   -0.09018
F18   4    0.455805    0.662591    1.209586    61.00000    0.40128    0.22884 =
         0.12916   -0.02339   -0.06360   -0.19325
PART 10
F13A  4    0.553317    0.656775    1.210799   -61.00000    0.13105
F14A  4    0.577947    0.677449    1.287603   -61.00000    0.13654
F16A  4    0.430964    0.657770    1.342335   -61.00000    0.12917
F18A  4    0.409111    0.664815    1.237898   -61.00000    0.08617
PART 0
F15   4    0.439849    0.739787    1.263374    11.00000    0.15065    0.11925 =
         0.17748   -0.02561   -0.05310    0.01468
F17   4    0.522935    0.593115    1.284527    11.00000    0.32112    0.11029 =
         0.21644   -0.06856   -0.08695    0.03918
P4    5    0.428174    0.794848    0.885185    11.00000    0.06083    0.10246 =
         0.08734   -0.05142   -0.01514   -0.01160
F19   4    0.521766    0.824001    0.870443    11.00000    0.06757    0.13795 =
         0.10576   -0.06349   -0.00809   -0.02940
F20   4    0.478454    0.734522    0.855418    11.00000    0.07284    0.11743 =
         0.11542   -0.07029   -0.00579   -0.00913
F21   4    0.410342    0.834958    0.814912    11.00000    0.10687    0.12478 =
         0.10037   -0.05355   -0.03291   -0.02119
F22   4    0.335346    0.765560    0.900052    11.00000    0.05897    0.11003 =
         0.12432   -0.06345   -0.01809   -0.01104
F23   4    0.377699    0.854997    0.914203    11.00000    0.07278    0.11138 =
         0.10828   -0.06361   -0.00774   -0.01611
F24   4    0.448397    0.753857    0.954585    11.00000    0.08115    0.12722 =
         0.09998   -0.04088   -0.02563   -0.01078
HKLF 4

REM  v228_a.res in P-1
REM R1 =  0.0807 for   16141 Fo > 4sig(Fo)  and  0.1057 for all   23322 data
REM   1477 parameters refined using     36 restraints

END

WGHT      0.1659      3.8224

REM Highest difference peak  2.242,  deepest hole -0.559,  1-sigma level  0.106
Q1    1   0.7145  0.6593  0.5738  11.00000  0.05    2.24
Q2    1   0.7773  0.8186  0.9681  11.00000  0.05    1.66
Q3    1   0.6804  0.5728  0.6350  11.00000  0.05    1.54
Q4    1   0.8601  0.0546  0.0916  11.00000  0.05    1.50
Q5    1   0.7222  0.7378  1.0198  11.00000  0.05    1.02
Q6    1   0.7600  0.7348  1.0413  11.00000  0.05    1.01
Q7    1   0.9438  0.0319  0.0717  11.00000  0.05    0.91
Q8    1   0.1550  0.8592  1.2392  11.00000  0.05    0.88
Q9    1   1.1005  0.6515  0.6480  11.00000  0.05    0.81
Q10   1   0.6030  1.2408  0.5410  11.00000  0.05    0.76
Q11   1   1.0167  0.5465  0.7656  11.00000  0.05    0.69
Q12   1   0.2365  0.7535  0.7060  11.00000  0.05    0.64
Q13   1   0.9745  0.7248  1.3306  11.00000  0.05    0.63
Q14   1   0.6260  1.2064  0.5828  11.00000  0.05    0.63
Q15   1   0.5960  0.6074  1.2960  11.00000  0.05    0.59
Q16   1   1.2307  0.6466  0.8896  11.00000  0.05    0.57
Q17   1   1.0354  0.5999  0.6691  11.00000  0.05    0.55
Q18   1   0.8389  0.7423  1.0285  11.00000  0.05    0.53
Q19   1   0.7862  0.6237  0.5669  11.00000  0.05    0.53
Q20   1   0.6228  0.6548  0.5803  11.00000  0.05    0.52
Q21   1   0.4025  0.6909  1.2629  11.00000  0.05    0.51
Q22   1   0.5385  0.6358  1.2791  11.00000  0.05    0.50
Q23   1   0.8156  0.9411  0.8178  11.00000  0.05    0.50
Q24   1   0.5427  0.7047  1.2743  11.00000  0.05    0.50
Q25   1   0.4508  0.6104  1.3128  11.00000  0.05    0.49
Q26   1   1.0530  0.5158  0.7259  11.00000  0.05    0.49
Q27   1   0.4133  0.6995  1.2490  11.00000  0.05    0.49
Q28   1   0.7790  0.5899  0.6377  11.00000  0.05    0.48
Q29   1   0.0805  0.8013  0.7003  11.00000  0.05    0.48
Q30   1   1.1326  0.5850  0.6993  11.00000  0.05    0.45
Q31   1   0.4237  0.8481  0.8518  11.00000  0.05    0.45
Q32   1   0.8285  1.0390  0.6045  11.00000  0.05    0.43
Q33   1   0.4049  0.7563  0.9194  11.00000  0.05    0.43
Q34   1   0.4622  0.8381  0.8679  11.00000  0.05    0.42
Q35   1   0.8392  0.5288  0.6306  11.00000  0.05    0.42
Q36   1   0.5614  0.6801  1.2125  11.00000  0.05    0.42
Q37   1   0.4050  0.7808  0.8421  11.00000  0.05    0.41
Q38   1   0.4998  0.7946  0.8929  11.00000  0.05    0.41
Q39   1   0.8610  0.6179  0.5474  11.00000  0.05    0.40
Q40   1   1.1351  0.6439  0.8839  11.00000  0.05    0.40
Q41   1   0.7186  0.4969  0.7041  11.00000  0.05    0.40
Q42   1   0.5053  0.6919  1.3187  11.00000  0.05    0.39
Q43   1   0.6801  0.6135  0.5118  11.00000  0.05    0.39
Q44   1   0.6245  0.8775  0.3123  11.00000  0.05    0.39
Q45   1   0.6446  0.6826  0.4109  11.00000  0.05    0.39
Q46   1   0.9348  0.9832  1.2685  11.00000  0.05    0.38
Q47   1   0.6604  0.4720  0.7381  11.00000  0.05    0.38
Q48   1  -0.0161  0.8384  0.7230  11.00000  0.05    0.38
Q49   1   0.6820  0.5206  0.6930  11.00000  0.05    0.38
Q50   1   0.8511  0.5392  0.6197  11.00000  0.05    0.38
;
_shelx_res_checksum   85877

_shelx_hkl_file
;
   0   0  -2 14.2625 2.93717   5
   0   0  -2 13.0434 4.35718   1
   0   0  -2 20.2651 6.27978   2
   0   0   2 19.0592 7.58504   2
   0   0   3 11861.7 853.680   2
   0   0  -3 13266.4 853.183   1
   0   0  -3 13182.0 853.361   3
   0   0  -4 577.532 19.1553   1
   0   0  -4 603.353 20.0519   3
   0   0   4 495.612 21.1215   2
   0   0  -5 841.601 66.7922   1
   0   0   5 1015.18 63.5457   5
   0   0  -5 832.549 67.0082   3
   0   0   5 842.439 68.4145   2
   0   0  -6 16.6869 15.2679   2
   0   0  -6 28.1633 13.0177   3
   0   0   6 11.5516 14.0177   2
   0   0   7 1282.06 104.448   2
   0   0  -7 1625.24 108.919   4
   0   0  -7 1421.08 103.813   3
   0   0  -7 1565.87 105.920   2
   0   0  -8 956.317 66.9880   3
   0   0   8 811.557 58.2448   6
   0   0  -8 1022.18 72.3952   4
   0   0  -8 1039.45 69.3157   2
   0   0   8 864.355 67.1237   2
   0   0   9 80.8356 18.1474   2
   0   0  -9 31.2218 16.9767   2
   0   0  -9 40.3547 15.8534   3
   0   0  -9 44.4399 20.3160   4
   0   0 -10 3539.73 231.149   2
   0   0 -10 3374.90 229.159   3
   0   0 -10 3460.37 228.563   1
   0   0 -10 3125.54 234.008   4
   0   0  10 2875.45 228.734   2
   0   0  11 246.518 31.0839   2
   0   0 -11 284.689 30.9256   1
   0   0 -11 262.675 37.7729   4
   0   0 -11 210.006 30.7858   2
   0   0 -11 248.006 30.9866   3
   0   0 -12 78.9850 19.7872   2
   0   0 -12 79.1361 21.5284   3
   0   0  12 29.4495 17.4869   2
   0   0 -12 93.8954 21.8918   1
   0   0 -12 59.9128 26.1536   4
   0   0  13 633.787 44.2916  27
   0   0  13 617.335 43.8078  23
   0   0  13 533.899 43.8868  35
   0   0  13 444.494 53.1783   2
   0   0  13 637.508 43.3931  18
   0   0  13 607.808 47.0674   7
   0   0 -13 434.562 52.4112   2
   0   0  13 613.020 43.7739  11
   0   0  14 12.0758 11.1502  23
   0   0  14 22.8617 11.4289  27
   0   0  14 22.1477 15.1219   7
   0   0  14 21.8482 10.2383  18
   0   0  14 20.0538 11.8826  11
   0   0  14 7.59363 9.93623  35
   0   0  15 1832.26 128.979  35
   0   0  15 1673.03 128.162  23
   0   0  15 1987.25 128.379  18
   0   0  15 1832.25 128.254  11
   0   0  15 1983.36 132.073   7
   0   0  15 1974.87 129.554  27
   0   0  16 2.31374 12.7649  27
   0   0  16 4.36248 11.6492  18
   0   0  16 3.53283 11.6073  35
   0   0  16-6.05002 16.0015   7
   0   0  16 8.87943 12.5511  11
   0   0  17-0.72587 16.5727   7
   0   0  17-21.2611 16.3188  27
   0   0  17 11.6477 13.4060  35
   0   0  17 0.74931 13.3613  11
   0   0  18 347.753 31.8960  35
   0   0  18 329.509 35.3685   7
   0   0  18 402.800 34.1222  27
   0   0  18 348.557 30.8775  11
   0   0  19 85.5261 22.0139   7
   0   0  19 114.867 20.7223  27
   0   0  19 91.0790 16.2738  11
   0   0  19 83.4867 17.4065  35
   0   0  20-10.8108 16.2258  27
   0   0  20 0.79145 18.0484   7
   0   0  20 4.17618 13.8195  35
   0   0  20-13.9870 13.5106  11
   0   0 -21 53.5859 17.0199  21
   0   0  21 55.4120 18.0824  27
   0   0  21 30.5512 19.7952   7
   0   0  21 42.1865 14.5943  35
   0   0  22 15.9539 17.3714   7
   0   0 -22-1.29150 14.4162  21
   0   0  22-12.7058 15.6695  27
   0   0  22 4.55085 12.8557  35
   0   0  23 134.115 22.3764   7
   0   0 -23 108.507 16.8916  21
   0   0  23 115.935 15.4879  35
   0   0  23 157.723 18.2207  27
   0   0  24-0.56817 15.0258   7
   0   0  24 2.39966 8.63592  35
   0   0 -24-1.75001 11.0556  21
   0   0  25 29.7624 6.42159  35
   0   0  25 17.2412 13.9499   7
   0   0 -25 28.0464 9.01681  21
   0  -1  24 12.4607 7.65574  35
   0   1 -24 23.2806 11.0165  21
   0   1 -23 3.54339 12.9107  21
   0  -1  23-3.74686 9.58440  35
   0  -1  23 4.95661 12.9636  27
   0  -1  23 20.3093 16.2940   7
   0  -1  22-1.68219 15.2159  27
   0  -1  22 19.0891 17.2131   7
   0  -1  22 25.7001 12.3263  35
   0   1 -22 24.8837 14.8803  21
   0  -1  21 3.30868 15.9566  27
   0  -1  21 8.26813 13.4104  35
   0  -1  20-8.80201 13.5454  11
   0  -1  20 6.78647 14.0039  35
   0  -1  20-7.59171 15.8550  27
   0  -1  19 12.8218 13.8434  35
   0  -1  19-8.88990 13.6806  11
   0  -1  19-2.60337 16.4786  27
   0  -1  18 73.9595 19.5145  27
   0  -1  18 103.430 17.3761  35
   0  -1  18 86.0107 16.5060  11
   0  -1  17 144.660 18.7296  35
   0  -1  17 109.721 17.8156  11
   0  -1  17 136.668 19.6438  27
   0  -1  16 93.1576 16.1923  35
   0  -1  16 100.329 15.2321  18
   0  -1  16 138.453 18.1042  27
   0  -1  16 115.067 17.1353  11
   0  -1  15 305.444 28.0369  25
   0  -1  15 242.726 26.1591  11
   0  -1  15 284.536 26.6411  35
   0  -1  15 342.255 25.9418  18
   0  -1  15 325.501 27.8511  27
   0  -1  14 103.350 13.0067  18
   0  -1  14 85.1223 14.9049  25
   0  -1  14 95.8143 14.4560  27
   0  -1  14 78.3025 13.3918  35
   0  -1  14 72.8795 14.5987  11
   0  -1  13-6.78178 10.1913  27
   0  -1  13 2.00837 8.93025  18
   0  -1  13-7.07723 9.80976  35
   0   1 -12 10.6352 16.1601   1
   0   1 -12 1.98848 21.8943   4
   0   1 -12-2.76240 14.1678   2
   0  -1  12 9.58555 9.17038  27
   0   1 -11 322.501 42.9430   4
   0   1 -11 372.483 37.9190   3
   0   1 -11 318.148 35.6981   2
   0   1 -11 369.318 35.6345   1
   0  -1  11 283.121 35.2878   2
   0  -1  10 55.9694 16.9352   2
   0   1 -10 38.9522 17.7456   2
   0   1 -10 89.6442 25.2594   4
   0   1 -10 44.6031 17.2962   3
   0   1 -10 43.0954 16.2091   1
   0   1  -9 415.980 39.4735   2
   0   1  -9 423.688 38.2262   3
   0   1  -9 437.816 37.7037   1
   0  -1   9 322.394 37.2389   2
   0   1  -8 3.46503 11.6297   1
   0   1  -8 9.34776 13.7223   2
   0  -1   8 21.1546 14.0642   2
   0   1  -8 16.7416 13.3483   3
   0  -1   7 859.751 70.0169   2
   0   1  -7 968.227 69.7665   3
   0   1  -7 1013.21 71.4413   2
   0  -1   7 916.746 63.7298   5
   0  -1   6 208.166 23.1589   2
   0  -1   6 210.815 16.3172   5
   0   1  -6 192.554 21.3839   3
   0   1  -6 178.298 22.4199   2
   0  -1   5 13.7954 6.21085   5
   0  -1   5 5.75080 12.9690   2
   0   1  -5 40.3492 11.7508   3
   0   1  -5 28.3645 14.0248   2
   0  -1   4 1472.02 103.311   5
   0   1  -4 1556.65 105.932   3
   0  -1   4 1642.76 106.637   2
   0   1  -3 29.8712 7.85545   1
   0   1  -3 34.8839 8.47666   3
   0  -1   3 24.1394 7.49645   1
   0  -1   3 19.0012 10.1925   2
   0  -1   2 2414.72 174.339   2
   0   1  -2 2688.96 174.099   1
   0   1  -2 2660.32 174.358   3
   0  -1   2 2592.78 174.102   1
   0   1   2 323.878 26.1467   2
   0   1   2 353.305 25.9220   4
   0  -1  -3 14332.4 920.493   5
   0  -1  -3 12648.9 923.032   4
   0   1   3 13549.7 922.966   2
   0  -1  -4 779.905 61.0017   4
   0   1   4 826.237 61.2076   2
   0   1   4 836.405 56.4096   6
   0  -1  -4 833.528 61.2497   2
   0  -1  -4 883.912 59.7772   3
   0  -1  -4 819.538 56.8183   5
   0   1   5 959.777 65.4836   6
   0   1   5 965.111 71.4063   2
   0  -1  -5 922.272 71.7518   4
   0  -1  -5 957.838 65.9957   5
   0  -1  -5 1031.53 69.8645   3
   0   1   6 825.297 54.9839   6
   0  -1  -6 932.398 60.9492   3
   0  -1  -6 800.993 63.1463   4
   0  -1  -6 729.712 55.4883   5
   0   1   6 820.389 62.2502   2
   0  -1  -7 181.326 24.7781   4
   0   1   7 183.640 24.2338   2
   0  -1  -7 133.932 20.0598   1
   0   1   7 181.122 14.1329   6
   0  -1  -7 212.450 22.0119   3
   0  -1  -8 24.7304 15.3152   2
   0  -1  -8 19.7958 13.8649   3
   0   1   8 19.1707 15.7161   2
   0   1   8 28.1799 4.77401   6
   0  -1  -8 21.3665 17.8337   4
   0   1   9 63.4872 19.4218   2
   0  -1  -9 108.710 20.1315   2
   0  -1  -9 106.105 18.5903   3
   0  -1  -9 75.9968 21.9993   4
   0  -1 -10 47.1201 18.4329   2
   0  -1 -10 1.44300 18.7822   4
   0   1  10 35.0583 16.6066   2
   0  -1 -10 21.4383 16.5798   3
   0  -1 -11 55.5535 19.2812   1
   0  -1 -11 73.2477 20.2261   3
   0  -1 -11 54.1443 19.5871   2
   0  -1 -11 71.2679 25.3877   4
   0   1  11 76.5725 20.0428   2
   0   1  12 810.056 75.4239   2
   0  -1 -12 837.185 81.7211   4
   0  -1 -12 944.772 76.0307   3
   0  -1 -12 999.830 75.7253   1
   0  -1 -12 958.245 76.7808   2
   0   1  13 388.879 32.4398  35
   0   1  13 310.559 41.9010   2
   0  -1 -13 379.808 43.0955   2
   0   1  13 424.418 32.8634  27
   0   1  13 442.782 32.2411  18
   0   1  13 521.120 36.6608   7
   0   1  13 408.583 32.3067  23
   0   1  14 15.2678 11.2806  27
   0   1  14 18.6208 11.7517  11
   0   1  14 33.7645 15.2137   7
   0   1  14 34.0198 10.9229  35
   0   1  14 8.73875 10.9336  23
   0   1  14 32.0543 10.1939  18
   0   1  15 24.4100 12.9522  27
   0   1  15 39.6102 11.0166  18
   0   1  15 2.58225 12.6261  11
   0   1  15 2.42281 16.1060   7
   0   1  15 4.87863 11.3203  35
   0   1  16 549.125 43.3973  27
   0   1  16 536.166 42.5405  35
   0   1  16 622.057 46.5929   7
   0   1  16 510.559 41.7136  11
   0   1  17 446.927 40.0382   7
   0   1  17 412.445 34.6305  11
   0   1  17 452.635 35.8235  35
   0   1  17 394.857 36.3575  27
   0   1  18 358.429 33.2681  11
   0   1  18 444.034 35.4746  35
   0   1  18 429.979 39.2192   7
   0   1  18 421.927 36.5268  27
   0   1  19-15.4847 15.3743  35
   0   1  19-10.4158 19.6891   7
   0   1  19-10.6701 13.5196  11
   0   1  19-39.0103 18.5242  27
   0   1  20 17.9131 14.6471  35
   0   1  20 28.6870 16.6726  27
   0   1  20-13.7591 18.9323   7
   0   1  21 136.744 18.3226  35
   0  -1 -21 71.9287 18.5746  21
   0   1  21 103.333 19.8047  27
   0   1  21 87.5087 22.3082   7
   0   1  22 97.6546 16.2077  35
   0   1  22 78.3492 18.9206  27
   0  -1 -22 67.4891 17.2779  21
   0   1  22 108.677 21.9092   7
   0   1  23 27.8422 16.9193   7
   0   1  23 13.1316 11.5914  35
   0  -1 -23 11.9731 13.0471  21
   0   1  23 4.70316 14.1954  27
   0   1  24 14.7981 16.0818   7
   0   1  24 16.2127 9.71270  35
   0  -1 -24 8.74231 11.3271  21
   0  -1 -25-2.19444 8.74102  21
   0   1  25-6.12376 14.1960   7
   0   1  25 19.7469 7.08915  35
   0   2 -24 18.6531 10.4172  21
   0  -2  24 17.3290 14.0067   7
   0  -2  24 23.2016 6.82483  35
   0  -2  23 21.1333 12.4987  27
   0  -2  23 14.0403 8.92830  35
   0   2 -23 19.9947 12.9936  21
   0   2 -22 2.45615 13.8454  21
   0  -2  22 30.3551 14.7061  27
   0  -2  22-6.25742 10.8088  35
   0  -2  21 210.208 24.0424  27
   0  -2  21 182.400 20.2682  35
   0  -2  21 176.928 19.9937  11
   0  -2  20-24.6859 14.2412  11
   0  -2  20 0.49509 16.3848  27
   0  -2  20-10.5129 13.0805  35
   0  -2  19-5.12292 13.2761  35
   0  -2  19-8.51748 13.5491  11
   0  -2  19-4.63839 16.8656  27
   0  -2  18 6.20900 17.8092  27
   0  -2  18 64.4104 15.4276  35
   0  -2  18 34.4199 14.3602  11
   0  -2  17 16.0250 13.0066  35
   0  -2  17-1.17076 13.8391  11
   0  -2  17 18.6239 15.3672  27
   0  -2  16 140.872 19.3888  11
   0  -2  16 194.214 21.3018  27
   0  -2  16 159.626 19.7949  35
   0  -2  16 173.388 18.5018  18
   0  -2  15 0.54515 13.5388   8
   0  -2  15 30.9418 13.2400  25
   0  -2  15-11.2638 12.5306  23
   0  -2  15 8.45787 12.3346  11
   0  -2  15 3.85601 10.8310  35
   0  -2  15-5.32392 12.7162  27
   0  -2  15 18.7280 10.4665  18
   0  -2  14 152.093 18.0147  23
   0  -2  14 152.391 20.1804   8
   0  -2  14 170.817 16.8632  18
   0  -2  14 155.352 19.1424  25
   0  -2  14 154.020 18.3862  27
   0  -2  14 159.780 17.9555  35
   0  -2  13 107.600 17.1018   8
   0  -2  13 106.847 15.7536  25
   0  -2  13 123.790 15.0392  27
   0  -2  13 116.290 13.4694  18
   0  -2  13 110.577 14.2691  23
   0  -2  13 85.5189 13.5224  35
   0   2 -12 142.562 33.8048   4
   0  -2  12 187.153 16.2731  18
   0  -2  12 144.573 16.4803  35
   0  -2  12 185.420 17.6589  27
   0  -2  12 167.955 16.6862  23
   0   2 -12 169.108 26.6728   2
   0   2 -11 383.199 48.2831   4
   0   2 -11 360.892 41.3531   4
   0   2 -11 351.575 39.6288   2
   0   2 -11 450.830 40.2910   1
   0   2 -10 401.494 39.0329   2
   0   2 -10 363.328 39.9483   4
   0   2 -10 358.369 37.5627   3
   0   2 -10 365.379 36.6016   1
   0  -2   9 1045.34 81.3367   3
   0  -2   9 1003.97 70.7271   5
   0   2  -9 1130.24 80.6757   3
   0   2  -9 1128.28 79.4433   1
   0   2  -9 1028.62 80.3300   2
   0   2  -8 2482.77 153.827   2
   0  -2   8 2010.28 144.776   5
   0  -2   8 2094.79 152.135   3
   0   2  -8 2398.34 151.525   1
   0   2  -8 2154.17 151.745   3
   0  -2   7 9.71740 6.94266   5
   0   2  -7 14.0015 12.5095   1
   0   2  -7 23.1188 13.3297   2
   0   2  -7 8.92363 11.9897   3
   0  -2   6 411.013 32.7456   5
   0   2  -6 508.393 37.9893   3
   0   2  -6 454.233 38.1984   2
   0  -2   5 9434.39 659.673   5
   0  -2   5 10251.1 662.178   1
   0   2  -5 10172.9 662.838   2
   0   2  -5 10120.4 662.246   3
   0  -2   4 738.231 54.9994   3
   0   2  -4 712.549 54.5358   3
   0  -2   4 683.388 54.3869   1
   0   2  -4 840.130 56.4652   4
   0   2  -4 796.738 55.4727   2
   0   2  -3 31710.4 2105.76   4
   0   2  -3 27214.7 2104.40   2
   0  -2   3 34320.1 2105.42   3
   0   2  -3 31669.6 2104.96   3
   0  -2   3 34578.2 2105.04   1
   0  -2   2 689.877 47.9408   1
   0  -2   2 671.046 48.2780   3
   0   2  -2 656.506 48.2349   3
   0   2  -2 711.282 49.2226   4
   0  -2   1 25472.5 1658.81   1
   0   2  -1 25676.5 1660.04   4
   0  -2   1 25835.3 1659.23   3
   0   2  -1 25023.3 1659.17   3
   0   2  -1 23425.3 1658.65   1
   0   2   0 27890.8 1722.49   4
   0  -2   0 26435.0 1721.50   3
   0  -2   0 25227.8 1721.09   1
   0   2   0 24961.2 1721.37   3
   0   2   0 25958.9 1721.10   1
   0   2   1 1878.97 123.669   2
   0   2   1 1896.33 124.962   4
   0  -2  -1 1843.89 123.550   2
   0  -2  -1 1797.47 123.517   1
   0   2   1 1788.40 123.608   1
   0  -2  -2 8501.76 584.237   6
   0   2   2 8872.21 586.350   4
   0   2   2 9227.78 585.593   2
   0   2   3 682.215 46.6981   2
   0  -2  -3 606.572 43.2731   6
   0  -2  -3 648.020 46.5632   4
   0   2   3 596.669 46.6577   4
   0   2   4 150.201 19.1431   4
   0   2   4 203.472 13.7636   6
   0   2   4 187.750 20.7450   2
   0   2   5 3816.05 254.875   2
   0  -2  -5 3746.51 254.426   2
   0  -2  -5 3935.32 250.365   5
   0  -2  -5 3308.86 254.679   4
   0   2   5 3670.72 249.949   6
   0  -2  -6 210.895 21.1233   3
   0  -2  -6 192.754 23.7327   4
   0  -2  -6 208.121 16.2452   5
   0   2   6 184.454 25.0128   2
   0   2   6 174.117 15.2837   6
   0  -2  -7 2284.28 143.827   3
   0   2   7 1989.29 137.828   6
   0   2   7 2198.62 145.463   2
   0  -2  -7 2052.59 138.468   5
   0  -2  -7 1793.09 145.335   4
   0   2   8 4.53847 14.9173   2
   0  -2  -8 24.3884 7.86039   5
   0  -2  -8 24.4121 17.3235   4
   0  -2  -8 36.2234 14.6502   3
   0  -2  -9 375.326 43.3893   4
   0  -2  -9 448.470 40.3831   3
   0   2   9 407.608 41.7665   2
   0  -2 -10 574.127 47.9519   2
   0  -2 -10 520.215 45.8983   3
   0  -2 -10 433.554 49.1493   4
   0   2  10 467.228 46.6987   2
   0  -2 -11 24.4178 21.0492   4
   0   2  11 23.5819 16.7381   2
   0  -2 -11 12.3723 15.6004   2
   0  -2 -11 27.6466 17.5307   3
   0  -2 -12 3252.75 210.835   3
   0  -2 -12 2715.82 215.186   4
   0  -2 -12 3120.18 211.403   2
   0   2  12 2651.46 209.991   2
   0  -2 -12 2922.72 208.657   1
   0  -2 -13 65.9332 19.7956   2
   0   2  13 35.0699 9.94313  35
   0   2  13 35.8139 10.0051  23
   0   2  13 49.2125 20.2027   2
   0   2  13 32.6552 10.6051  27
   0   2  13 36.5569 14.5739   7
   0   2  13 54.5533 9.94197  18
   0  -2 -13 31.3725 25.2923   4
   0   2  14 73.9169 13.1539  11
   0   2  14 79.5141 11.2858  29
   0   2  14 74.0128 12.4737  35
   0   2  14 63.7995 12.2443  23
   0   2  14 65.1643 12.0661  18
   0   2  14 82.9073 13.7661  27
   0   2  14 101.955 17.5200   7
   0   2  15 644.629 48.0088  35
   0   2  15 682.258 48.4676  27
   0   2  15 738.343 51.7776   7
   0   2  15 572.038 46.4442  29
   0   2  15 659.110 47.2751  18
   0   2  15 602.567 47.3467  11
   0   2  16 8.19094 13.1939  11
   0   2  16 25.1154 12.8044  35
   0   2  16 23.2255 16.8045   7
   0   2  16-1.82107 13.9232  27
   0   2  17 385.813 33.3623  11
   0   2  17 403.990 34.4507  35
   0   2  17 487.598 39.6366   7
   0   2  17 382.705 35.1506  27
   0   2  18 19.1395 14.9563  35
   0   2  18 17.9983 13.5719  11
   0   2  18 6.20130 18.7113   7
   0   2  18-34.5451 17.5349  27
   0   2  19 369.171 34.6713  27
   0   2  19 363.729 32.9411  35
   0   2  19 369.518 38.1106   7
   0   2  20 130.660 20.3985  27
   0  -2 -20 101.153 18.8002  21
   0   2  20 112.207 18.2676  35
   0   2  20 64.4352 22.5044   7
   0   2  21 59.1187 18.5704  27
   0   2  21 78.7238 20.3089   7
   0   2  21 62.8853 16.0547  35
   0  -2 -21 53.5170 16.9866  21
   0   2  22 30.1939 17.3957  27
   0  -2 -22 30.5692 14.9535  21
   0   2  22 34.8613 20.7707   7
   0   2  22 50.4804 14.9349  35
   0  -2 -23 11.7166 13.2726  21
   0   2  23 30.0154 17.4540   7
   0   2  23 33.2599 12.8219  35
   0  -2 -24-2.46433 11.3110  21
   0   2  24 4.40886 16.4485   7
   0   2  24-7.44297 10.3512  35
   0   2  25 34.8632 8.70890  35
   0  -2 -25 30.1724 9.80799  21
   0   3 -24-0.23590 8.80911  21
   0   3 -23 5.09387 11.4934  21
   0  -3  23 4.93842 7.65848  35
   0  -3  23 3.02629 10.9806  27
   0  -3  22 52.3174 11.2523  35
   0  -3  22 31.1224 14.4298  27
   0   3 -22 35.6973 14.7625  21
   0  -3  21 34.1905 12.7674  11
   0  -3  21 45.8279 12.5459  35
   0  -3  21 20.0391 16.3789  27
   0  -3  20 10.4376 12.7269  35
   0  -3  20 1.78224 13.0042  11
   0  -3  20 0.96154 15.7958  27
   0  -3  19-13.1115 13.4089  11
   0  -3  19 0.50777 15.7274  27
   0  -3  19 8.62374 13.0599  35
   0  -3  18 86.1551 16.7885  11
   0  -3  18 114.452 17.3338  35
   0  -3  18 90.3497 19.4001  27
   0  -3  17 113.052 20.0333   8
   0  -3  17 105.048 16.9313  35
   0  -3  17 119.777 19.2868  27
   0  -3  17 94.2907 17.1356  11
   0  -3  17 85.4309 20.3585   7
   0  -3  16 7.78480 14.6521   8
   0  -3  16 13.1161 14.3067  27
   0  -3  16-3.57791 11.4145  18
   0  -3  16-14.8240 17.4812   7
   0  -3  16 17.5555 14.1779  25
   0  -3  16-8.47773 13.7427  11
   0  -3  16 1.37880 12.0018  35
   0  -3  15 16.9511 10.8007  18
   0  -3  15 27.3949 13.4464  25
   0  -3  15 11.3399 11.7457  35
   0  -3  15 24.9671 15.4485   7
   0  -3  15 12.2878 12.8193  27
   0  -3  15 25.8833 14.8375   8
   0  -3  15-4.78263 13.4711  23
   0  -3  14 59.9025 16.0147   8
   0  -3  14 57.4936 12.9428  23
   0  -3  14 44.5714 12.7492  35
   0  -3  14 71.1379 15.2622  25
   0  -3  14 57.4824 14.3876  27
   0  -3  14 81.2678 12.0891  18
   0  -3  14 56.1048 16.9333   7
   0  -3  13 60.4964 13.0275  23
   0  -3  13 84.5450 13.4337  27
   0  -3  13 68.1046 11.6325  18
   0  -3  13 73.8312 16.4768   7
   0  -3  13 75.6112 12.7613  35
   0  -3  13 57.6319 15.1915   8
   0  -3  13 84.1971 14.8441  25
   0  -3  12 142.279 19.3691   8
   0   3 -12 124.996 25.0784   2
   0  -3  12 178.537 17.1689  23
   0  -3  12 146.292 16.1848  34
   0  -3  12 154.747 16.7706  35
   0  -3  12 191.511 20.9824   7
   0  -3  12 194.192 17.9358  27
   0  -3  12 170.638 15.8824  18
   0  -3  11 154.424 17.8639   8
   0   3 -11 108.738 22.5898   2
   0   3 -11 143.880 24.0498   1
   0  -3  11 153.429 15.2746  23
   0  -3  11 190.494 19.2630   7
   0   3 -11 102.580 26.4710   4
   0   3 -10-3.99371 17.3380   4
   0   3 -10 3.86398 14.2160   1
   0   3 -10 5.74810 14.5184   2
   0  -3  10 11.1099 3.18047   6
   0  -3  10 10.8886 17.7975   3
   0   3  -9 3622.07 223.241   1
   0   3  -9 3478.43 226.753   4
   0  -3   9 2923.08 215.000   5
   0   3  -9 3508.97 224.736   2
   0  -3   9 3372.80 225.403   3
   0   3  -8 151.410 20.1047   1
   0   3  -8 87.5899 19.6766   2
   0  -3   8 100.248 20.8418   3
   0  -3   8 89.2481 12.6036   5
   0   3  -8 119.436 22.5300   4
   0   3  -7 6298.25 398.750   2
   0   3  -7 5031.35 396.732   3
   0   3  -7 5973.56 399.662   4
   0   3  -7 6485.88 397.525   1
   0  -3   7 5897.09 398.608   3
   0  -3   7 5773.38 393.484   5
   0   3  -6 7.60171 11.4101   1
   0   3  -6 6.35453 12.4362   3
   0  -3   6 1.19325 11.2465   1
   0   3  -6 10.0246 12.7833   4
   0   3  -6 9.04890 13.0993   2
   0  -3   5 25526.5 1684.79   1
   0   3  -5 24075.9 1683.87   1
   0   3  -5 24287.9 1684.76   3
   0   3  -5 25447.9 1686.46   4
   0   3  -5 27643.0 1685.51   2
   0   3  -4 44322.1 3107.18   3
   0   3  -4 46434.8 3108.53   4
   0   3  -4 48227.2 3107.16   2
   0  -3   4 47839.1 3107.02   1
   0  -3   3 6802.98 430.923   1
   0   3  -3 6802.37 431.036   2
   0   3  -3 6298.39 431.160   3
   0   3  -3 6576.41 432.545   4
   0  -3   3 5734.41 430.801   3
   0  -3   2 52248.3 3445.40   1
   0   3  -2 51802.5 3447.08   4
   0  -3   2 52383.2 3446.02   3
   0  -3   2 53909.8 3447.16   4
   0   3  -2 49528.0 3445.74   3
   0   3  -1 11572.0 775.743   3
   0  -3   1 11301.2 775.779   3
   0   3  -1 11417.3 776.883   4
   0  -3   1 12117.5 775.269   1
   0   3   0 2927.64 194.800   4
   0  -3   0 2941.50 193.373   3
   0   3   0 2754.44 193.244   3
   0  -3   0 2880.54 192.763   1
   0   3   1 20653.1 1497.99   3
   0  -3  -1 23692.4 1497.79   1
   0  -3  -1 23219.3 1497.54   2
   0   3   1 20579.0 1497.62   1
   0  -3  -1 23943.2 1498.29   3
   0   3   1 23856.2 1499.92   4
   0  -3  -2 277.474 20.2444   6
   0   3   2 325.075 24.3638   4
   0  -3  -2 237.340 21.0252   3
   0   3   2 235.385 21.5194   2
   0  -3  -2 253.670 21.4599   2
   0  -3  -2 238.212 20.5716   1
   0  -3  -3 1631.36 109.182   6
   0   3   3 1609.37 112.744   4
   0   3   3 1562.73 111.371   2
   0  -3  -3 1601.57 111.082   2
   0  -3  -3 1610.66 112.424   4
   0   3   4 364.885 34.2473   4
   0  -3  -4 411.071 34.4781   4
   0  -3  -4 406.435 29.6666   6
   0   3   4 401.984 34.5896   2
   0  -3  -5 58.7140 15.8439   4
   0   3   5 52.4491 16.1901   2
   0   3   6 115.762 20.7972   2
   0  -3  -6 143.785 21.9635   4
   0  -3  -7 385.307 41.8800   4
   0  -3  -7 498.005 35.7530   5
   0   3   7 460.337 43.3080   2
   0  -3  -7 531.413 40.7983   3
   0   3   8 27.4475 17.4445   2
   0  -3  -8 46.6591 15.1063   3
   0  -3  -8 25.4568 17.1723   4
   0  -3  -8 46.3071 8.89853   5
   0  -3  -9 528.870 51.0711   4
   0   3   9 532.005 49.4612   2
   0  -3  -9 590.441 47.3833   3
   0  -3  -9 532.538 40.3135   5
   0  -3 -10 61.5905 18.0415   1
   0  -3 -10 51.3349 17.9490   3
   0   3  10 36.3914 19.5499   2
   0  -3 -10 95.7898 20.1962   2
   0  -3 -10 57.6402 9.88114   5
   0  -3 -10 47.8293 20.8964   4
   0  -3 -11 1055.47 92.6226   4
   0  -3 -11 1160.09 87.3921   3
   0  -3 -11 1136.80 88.5006   2
   0   3  11 1084.21 88.9906   2
   0  -3 -12 128.415 30.3498   4
   0   3  12 157.149 26.6850   2
   0  -3 -12 170.785 27.1672   3
   0  -3 -12 192.446 27.2545   2
   0  -3 -13 757.916 78.7078   4
   0   3  13 867.315 61.5980  27
   0   3  13 996.089 64.6985   7
   0   3  13 813.019 61.1815  35
   0   3  13 850.682 60.8529  18
   0   3  14 53.5576 12.4831  11
   0   3  14 49.7577 9.95451  29
   0   3  14 60.4845 12.9480  27
   0   3  14 72.3248 16.6333   7
   0   3  14 54.6320 11.7562  35
   0   3  15 59.3964 13.9839  11
   0   3  15 88.8815 18.1241   7
   0   3  15 55.2263 11.1754  29
   0   3  15 79.0598 13.7621  35
   0   3  15 68.3805 14.1095  27
   0   3  16 2042.16 145.860  11
   0   3  16 1970.96 145.479  29
   0   3  16 2227.52 147.509  27
   0   3  16 2182.38 147.124  35
   0   3  16 2542.96 151.260   7
   0   3  17-0.72740 17.2527   7
   0   3  17-6.84623 15.7411  27
   0   3  17 8.19731 9.74316  29
   0   3  17 9.99258 13.1381  11
   0   3  17 18.3299 13.8511  35
   0   3  18 66.5734 21.4956   7
   0   3  18 75.0443 16.7515  35
   0   3  18 77.9613 18.6939  27
   0  -3 -19 706.757 57.5474  21
   0   3  19 736.811 61.8876   7
   0   3  19 775.980 57.7406  35
   0   3  19 798.107 58.6737  27
   0  -3 -20 52.4714 16.3361  21
   0   3  20 42.9837 20.3016   7
   0   3  20 74.5225 17.1463  35
   0   3  20 42.4877 17.4242  27
   0   3  21 0.83445 17.6391   7
   0   3  21 16.0623 14.8913  35
   0   3  21-18.9378 17.3734  27
   0  -3 -21 8.99824 14.9788  21
   0   3  22-1.26174 13.9271  35
   0   3  22-4.73602 16.1662  27
   0  -3 -22 0.86994 14.4992  21
   0   3  22 9.86021 19.1243   7
   0   3  23 18.6562 18.8948   7
   0  -3 -23 28.8241 13.1830  21
   0   3  23 45.8949 13.5592  35
   0   3  24 38.2653 8.57210  13
   0   3  24 38.3881 18.0209   7
   0   3  24 43.8945 12.1366  35
   0  -3 -24 55.2056 12.5417  21
   0   3  25 0.68843 8.05590  35
   0  -3 -25 0.92192 9.08026  21
   0  -4  23 1.89894 10.2310  27
   0   4 -23 1.75861 10.5250  21
   0  -4  22 30.4971 13.4521  27
   0  -4  22-3.05291 8.51756  35
   0  -4  21 0.66848 15.5633   7
   0  -4  21 0.41136 14.7924  27
   0  -4  21 21.0843 10.8650  35
   0  -4  21-5.02572 11.5598  11
   0  -4  20 7.96395 13.2341  11
   0  -4  20 21.8836 12.4030  35
   0  -4  20 4.16603 15.7449  27
   0  -4  20-0.72188 16.4251   7
   0  -4  19 47.6298 14.7459  11
   0  -4  19 46.1457 14.4228  35
   0  -4  19 47.3070 19.3813   7
   0  -4  19 82.4766 18.7571  27
   0  -4  18 15.3207 18.0967   7
   0  -4  18-6.66386 16.6953  27
   0  -4  18-5.59978 13.6518  11
   0  -4  18 24.4210 13.3118  35
   0  -4  17 166.817 21.4487  25
   0  -4  17 156.669 19.8539  35
   0  -4  17 169.148 22.2761  27
   0  -4  17 124.147 19.4278  11
   0  -4  17 186.090 24.6550   7
   0  -4  17 170.663 22.9747   8
   0  -4  16 4.45026 14.4305  27
   0  -4  16 2.79016 12.0954  35
   0  -4  16 0.71871 16.0168   7
   0  -4  16 9.74030 13.9415  25
   0  -4  16 6.74522 14.7858   8
   0  -4  15 33.4399 12.7064  35
   0  -4  15 35.0860 14.7300  27
   0  -4  15 62.8854 18.0595   7
   0  -4  15 29.1258 15.6635   8
   0  -4  15 65.2824 15.9121  25
   0  -4  15 32.8334 10.7562  18
   0  -4  14 415.961 36.3972   8
   0  -4  14 443.758 32.7793  18
   0  -4  14 377.473 33.7304  35
   0  -4  14 380.262 35.7151  25
   0  -4  14 386.318 33.5847  23
   0  -4  14 448.436 34.8513  27
   0  -4  14 506.696 38.3048   7
   0  -4  13 6.38429 11.3532  27
   0  -4  13 1.38963 10.9139  23
   0  -4  13 10.0003 13.6570   8
   0  -4  13 35.1608 14.4512   7
   0  -4  13 12.8304 9.25379  18
   0  -4  13 18.9178 13.2214  25
   0  -4  13-5.85528 10.6784  35
   0  -4  12 49.0887 11.4492  23
   0  -4  12 31.7608 10.3787  35
   0   4 -12 18.5215 15.6689   2
   0  -4  12 29.7449 11.0570  27
   0  -4  12 39.7553 9.40183  18
   0  -4  12 32.8741 14.0325   7
   0  -4  12 42.2655 13.6594  25
   0  -4  12 32.3759 10.5670  34
   0  -4  12 31.9677 13.7724   8
   0   4 -11 5.23160 13.8684   2
   0  -4  11 4.97100 8.69152  34
   0  -4  11 2.54077 8.97425  23
   0  -4  11 10.6270 12.4721   7
   0  -4  11-22.5491 10.7135  27
   0   4 -10 8.18184 14.6783   2
   0   4 -10 21.1105 15.6981   1
   0  -4  10-24.5812 20.3834   3
   0  -4  10 2.44057 4.94971   5
   0   4 -10 5.79607 17.5971   4
   0  -4  10 1.38121 4.45281   6
   0   4  -9 2086.90 143.973   1
   0   4  -9 2093.84 148.973   4
   0  -4   9 1864.11 137.554   5
   0  -4   9 1977.55 146.847   3
   0  -4   9 2065.57 137.118   6
   0   4  -9 2109.18 145.805   2
   0   4  -8 43.3015 16.3866   1
   0  -4   8 28.7930 19.1498   3
   0   4  -8 31.1586 16.9127   2
   0  -4   8 29.3463 11.3703   5
   0   4  -8 15.8045 18.2580   4
   0   4  -7 6336.33 403.546   1
   0   4  -7 5981.50 406.795   4
   0   4  -7 6205.36 404.863   2
   0  -4   7 5481.60 400.494   5
   0  -4   7 6225.07 405.822   3
   0  -4   7 5877.63 404.025   1
   0  -4   6 242.180 26.4249   3
   0   4  -6 260.350 26.1485   2
   0  -4   6 231.813 25.0167   1
   0   4  -6 240.940 23.9587   1
   0   4  -6 213.488 26.6916   4
   0   4  -5 581.162 44.9658   2
   0   4  -5 521.213 46.7703   4
   0   4  -5 566.399 43.7299   1
   0  -4   5 564.495 44.5699   1
   0   4  -4 44698.7 2850.54   4
   0  -4   4 45905.4 2848.27   1
   0   4  -4 42941.7 2847.45   1
   0   4  -4 38954.3 2847.40   2
   0  -4   3 20213.1 1272.43   3
   0   4  -3 16723.3 1270.53   1
   0   4  -3 19918.2 1271.43   2
   0  -4   3 19963.2 1271.54   1
   0   4  -3 19587.9 1273.93   4
   0  -4   2 5474.31 370.309   1
   0  -4   2 5644.19 371.165   3
   0   4  -2 5303.17 372.629   4
   0  -4   2 5659.25 372.718   4
   0   4  -1 1350.69 93.0936   2
   0  -4   1 1478.03 96.5643   4
   0  -4   1 1339.26 93.6676   1
   0   4  -1 1218.90 96.0010   4
   0  -4   1 1427.35 94.7695   3
   0   4   0 828.107 60.6913   2
   0  -4   0 1027.01 61.5365   1
   0  -4   0 990.539 62.3805   3
   0   4   0 983.451 64.5409   4
   0  -4  -1 16298.9 1037.27   3
   0   4   1 12838.9 1036.51   3
   0   4   1 16598.6 1039.52   4
   0  -4  -1 16533.6 1036.25   2
   0  -4  -1 16135.5 1036.54   1
   0   4   2 4344.65 287.118   4
   0  -4  -2 4036.13 284.616   3
   0  -4  -2 4279.71 283.956   6
   0  -4  -2 4415.16 284.224   2
   0  -4  -2 4096.96 284.160   1
   0  -4  -3 1627.75 118.798   3
   0   4   3 1732.29 121.604   4
   0  -4  -3 1744.68 119.033   2
   0  -4  -3 1678.01 118.674   1
   0  -4  -3 1797.36 117.645   6
   0  -4  -3 1729.50 121.359   4
   0   4   4 427.520 32.2365   4
   0  -4  -4 336.756 30.9752   4
   0  -4  -4 280.012 25.5663   6
   0  -4  -4 307.325 29.1618   2
   0   4   4 397.289 31.0891   2
   0   4   5 1898.03 131.739   2
   0  -4  -5 1839.11 132.568   4
   0  -4  -6 589.802 49.6304   4
   0   4   6 570.621 49.3637   2
   0   4   7 1030.72 76.2319   2
   0  -4  -7 924.761 75.9897   4
   0  -4  -8 7.72988 14.3869   3
   0  -4  -8 11.9403 16.8037   4
   0  -4  -8 2.26659 8.31778   5
   0   4   8 22.6828 18.1572   2
   0  -4  -9 1638.37 113.257   5
   0  -4  -9 1492.72 121.872   4
   0  -4  -9 1756.62 119.613   3
   0   4   9 1620.68 121.448   2
   0  -4 -10 455.391 47.1862   4
   0  -4 -10 526.284 44.1995   3
   0   4  10 462.934 46.2526   2
   0  -4 -10 429.821 35.5483   5
   0  -4 -11 91.8450 20.6819   1
   0  -4 -11 60.8975 25.0442   4
   0  -4 -11 95.4334 22.5931   2
   0   4  11 88.7889 23.0544   2
   0  -4 -11 124.764 22.8713   3
   0  -4 -12 256.032 39.0380   4
   0  -4 -12 300.991 34.9712   3
   0   4  12 287.362 35.3593   2
   0  -4 -12 275.683 34.3709   2
   0   4  13 118.268 15.4390  27
   0   4  13 143.119 15.1688  35
   0   4  14 87.0614 17.5026   7
   0   4  14 71.6292 11.3266  29
   0   4  14 70.7869 13.3608  11
   0   4  14 75.3088 13.5351  27
   0   4  14 81.6252 12.7378  35
   0   4  15 78.3089 14.5730  27
   0   4  15 79.8345 11.6787  29
   0   4  15 49.0960 13.7309  11
   0   4  15 78.6130 13.5184  35
   0   4  15 94.7672 18.7950   7
   0   4  16 900.112 67.1306  35
   0   4  16 900.285 67.7076  27
   0   4  16 1112.70 72.2116   7
   0   4  16 893.414 65.8290  29
   0   4  17 69.2586 15.3835  35
   0   4  17 65.0310 11.9966  29
   0   4  17 66.4612 21.2289   7
   0   4  17 21.0942 16.3372  27
   0   4  18 53.6106 16.3597  35
   0   4  18 47.6531 19.6932   7
   0   4  18 55.6025 12.0168  29
   0   4  18 50.2493 18.5031  27
   0  -4 -18 49.1907 16.3752  21
   0   4  19 758.168 55.7738   7
   0   4  19 717.444 50.8492  35
   0  -4 -19 635.204 49.9860  21
   0   4  19 564.391 46.9726  29
   0   4  19 648.350 51.1674  27
   0  -4 -20 78.9115 17.4415  21
   0   4  20 84.1877 17.3075  35
   0   4  20 89.2717 20.3336  27
   0   4  20 100.747 22.9244   7
   0   4  21 2.31870 14.6809  35
   0   4  21 12.4063 16.4780  27
   0   4  21 44.5460 20.6432   7
   0  -4 -21 8.88412 14.2417  21
   0   4  22 129.763 25.0405   7
   0   4  22 127.905 18.4997  35
   0  -4 -22 107.176 18.0019  21
   0   4  23 1.54707 18.2944   7
   0  -4 -23-7.90513 12.5673  21
   0   4  23-2.25950 13.1833  35
   0   4  24 44.6437 12.0683  35
   0   4  24 18.0610 8.80781  13
   0  -4 -24 35.4802 11.7132  21
   0   4  25-4.63484 8.80997  35
   0  -4 -25-5.50630 8.76453  21
   0  -5  23 2.82878 8.70548  27
   0   5 -23-5.78217 10.2715  21
   0  -5  22 7.54228 11.4662  27
   0  -5  22 0.54758 14.9608   7
   0  -5  21 18.9143 15.8619   7
   0  -5  21-2.29770 13.5492  27
   0  -5  21 14.0922 11.3404  11
   0  -5  21 5.17399 9.57157  35
   0  -5  20 82.2754 14.7580  11
   0  -5  20 91.5669 18.3648  27
   0  -5  20 67.0385 13.3435  35
   0  -5  20 67.3913 19.7077   7
   0  -5  19 19.3846 13.2051  11
   0  -5  19 14.9373 16.4726  27
   0  -5  19 27.8999 12.5139  35
   0  -5  19 2.20895 17.3416   7
   0  -5  18 20.0909 12.6464  35
   0  -5  18 1.25573 15.0930   8
   0  -5  18-7.58736 16.2078  27
   0  -5  18 0.76377 17.1797   7
   0  -5  18 23.8844 13.9318  11
   0  -5  17 19.6103 14.3836  11
   0  -5  17 38.2766 15.7728  25
   0  -5  17 5.29450 17.3483   7
   0  -5  17 1.02330 16.4512  27
   0  -5  17 20.3655 15.5575   8
   0  -5  17 31.9755 13.1461  35
   0  -5  16-2.01044 15.1592  27
   0  -5  16-14.7492 17.8224   7
   0  -5  16 9.43130 14.9078  25
   0  -5  16 8.14737 16.2601   8
   0  -5  16-6.52096 12.2540  35
   0  -5  15 10.0300 14.7891  25
   0  -5  15 1.81083 11.8385  35
   0  -5  15 0.48082 13.8507  27
   0  -5  15 8.42184 16.9003   7
   0  -5  15 13.2369 15.1670   8
   0  -5  15 2.29223 10.1783  18
   0  -5  14-4.35256 8.92849  18
   0  -5  14 9.07548 14.3975   8
   0  -5  14-0.43202 11.5372  35
   0  -5  14-28.6219 12.6928  23
   0  -5  14 0.64930 14.7241   7
   0  -5  14-6.77090 12.7848  27
   0  -5  14 3.03973 13.9038  25
   0  -5  13 29.4682 11.7833  35
   0  -5  13 43.6756 15.8900   7
   0  -5  13 30.0149 14.6016   8
   0  -5  13 44.6213 12.8969  23
   0  -5  13 48.4702 15.9455  25
   0  -5  13 45.8667 9.95473  18
   0  -5  13 22.5449 12.9391  27
   0  -5  12 47.8136 13.0314  27
   0  -5  12 61.0842 12.4900  23
   0  -5  12 72.6738 16.5434   7
   0  -5  12 64.1479 10.6154  18
   0  -5  12 51.8997 12.1105  35
   0  -5  12 63.9072 15.0285  25
   0  -5  11 17.5625 9.65570  23
   0   5 -11 23.7856 15.1697   2
   0  -5  11 27.5995 12.8884  25
   0  -5  11 14.7254 13.4451   7
   0  -5  11 11.2832 9.88746  34
   0  -5  11-4.16274 10.7748  27
   0  -5  11 9.21637 8.63102  35
   0   5 -10 389.656 45.5716   2
   0   5 -10 438.388 50.8432   4
   0   5 -10 460.386 47.1692   1
   0  -5  10 488.173 38.3707  34
   0  -5  10 564.959 38.4670  23
   0  -5  10 482.971 38.9535  27
   0  -5   9 83.9083 23.0388   3
   0   5  -9 82.3517 23.4704   4
   0  -5   9 102.558 12.9699   6
   0   5  -9 84.1503 19.4802   2
   0  -5   9 70.6642 14.2273   5
   0   5  -9 82.6071 19.9548   1
   0   5  -8 1571.90 126.230   2
   0   5  -8 1597.19 129.767   4
   0  -5   8 1607.18 122.499   5
   0   5  -8 1771.30 125.953   1
   0  -5   8 2000.63 121.767   6
   0  -5   8 1769.60 129.471   3
   0  -5   7 8834.59 609.842   3
   0   5  -7 9168.26 608.749   2
   0  -5   7 8877.02 608.464   1
   0   5  -7 9225.47 607.473   1
   0   5  -7 8950.31 611.932   4
   0   5  -6 39.0313 18.1437   4
   0   5  -6 38.8574 13.8789   1
   0  -5   6 42.5112 15.8408   3
   0   5  -6 29.0198 15.1789   2
   0  -5   6 35.6918 15.0900   1
   0   5  -5 3328.22 226.405   2
   0  -5   5 3290.30 226.411   1
   0   5  -5 3348.53 225.794   1
   0   5  -5 3172.28 229.221   4
   0  -5   5 3332.57 227.540   3
   0  -5   4 1122.71 79.4545   3
   0   5  -4 997.221 80.7743   4
   0   5  -4 1069.71 78.2047   2
   0   5  -4 1152.29 78.1624   1
   0  -5   4 1031.90 77.9334   1
   0   5  -3 10599.3 725.779   4
   0  -5   3 10879.4 722.884   1
   0   5  -3 10620.7 722.389   1
   0  -5   3 11136.5 723.925   3
   0   5  -2 58.5724 15.3403   4
   0   5  -2 52.4872 11.2822   1
   0  -5   2 53.2688 12.6080   3
   0  -5   2 25.1985 11.0832   1
   0   5  -1 307.154 28.4048   1
   0  -5   1 382.735 28.9598   1
   0  -5   1 353.146 30.0292   3
   0   5  -1 408.319 33.5034   4
   0   5  -1 390.412 28.4649   2
   0  -5   1 324.370 31.7493   4
   0  -5   0 737.105 56.5712   1
   0   5   0 809.788 60.7165   4
   0   5   0 806.085 56.5377   2
   0  -5   0 833.495 57.9715   3
   0  -5  -1 1162.06 77.7152   2
   0   5   1 1234.56 82.5481   4
   0   5   1 1159.24 78.2897   2
   0  -5  -1 1011.32 78.4926   3
   0  -5  -1 1049.45 77.9369   1
   0  -5  -2 1806.64 126.181   1
   0   5   2 1819.28 129.812   4
   0  -5  -2 1846.69 127.115   3
   0  -5  -2 1859.61 126.039   2
   0  -5  -2 1839.81 126.296   6
   0  -5  -3 78.9016 14.2270   3
   0  -5  -3 94.6380 14.1090   2
   0   5   3 65.2807 17.2076   4
   0  -5  -3 85.7659 13.3542   1
   0  -5  -3 81.6429 11.7895   6
   0  -5  -3 83.6859 16.1217   4
   0  -5  -4 6.77423 11.9716   2
   0  -5  -4 21.5893 9.46965   6
   0   5   4 5.47653 15.2281   4
   0  -5  -4 12.2898 11.1794   1
   0  -5  -4-3.64712 11.2456   3
   0  -5  -5 2173.04 148.770   6
   0  -5  -6 741.408 63.3272   4
   0   5   6 838.818 62.7266   2
   0   5   7 502.832 45.2826   2
   0  -5  -7 519.738 47.0569   4
   0   5   8 8249.43 533.276   4
   0  -5  -8 7400.91 530.839   4
   0   5   8 7850.69 530.164   2
   0   5   9 1359.52 103.801   2
   0  -5  -9 1464.54 102.814   2
   0  -5  -9 1343.69 100.768   3
   0  -5  -9 1394.54 95.9077   5
   0  -5  -9 1175.20 103.259   4
   0  -5 -10 2932.38 224.298   4
   0   5  10 3000.57 222.956   2
   0  -5 -10 3302.41 220.852   3
   0  -5 -10 3195.57 214.353   5
   0  -5 -11 401.492 47.1564   4
   0  -5 -11 489.081 44.3204   3
   0   5  11 402.882 44.6947   2
   0  -5 -12 1879.61 129.951   3
   0  -5 -12 1686.91 129.766   2
   0  -5 -12 1601.37 134.146   4
   0   5  12 1659.96 131.467   2
   0   5  13 876.538 65.0757  35
   0   5  13 871.495 65.3059  27
   0   5  13 1080.84 68.8535   7
   0   5  14 119.204 15.7529  35
   0   5  14 136.768 14.3091  29
   0   5  14 122.996 16.6265  27
   0   5  15 47.4121 13.9679  27
   0   5  15 54.5299 10.8729  29
   0   5  15 41.9816 12.2177  35
   0  -5 -15 54.3793 12.3431  21
   0   5  15 88.1318 19.8611   7
   0   5  16 282.604 25.0678  35
   0   5  16 258.758 23.1852  29
   0  -5 -16 231.444 24.2574  21
   0   5  16 256.183 25.9059  27
   0   5  17 371.250 32.4934  29
   0   5  17 400.720 35.9651  27
   0  -5 -17 443.038 35.2203  21
   0   5  17 416.978 34.9827  35
   0  -5 -18 2103.59 154.863  21
   0   5  18 2397.41 155.661  35
   0   5  18 2584.58 160.576   7
   0   5  18 2375.37 156.316  27
   0   5  18 2076.97 153.199  29
   0  -5 -19 115.142 18.6367  21
   0   5  19 107.762 19.2453  35
   0   5  19 90.8618 14.2165  29
   0   5  19 128.100 24.5361   7
   0   5  20 7.28866 20.7427   7
   0   5  20 27.7216 16.2649  35
   0   5  20-2.22368 10.6447  29
   0  -5 -20-11.9752 14.5741  21
   0   5  20-6.45094 16.9266  27
   0   5  21-10.2884 15.4272  35
   0  -5 -21-0.91951 14.1126  21
   0   5  21-3.63514 19.6158   7
   0   5  22-13.9397 20.8701   7
   0  -5 -22-6.35221 13.6830  21
   0   5  22 16.8845 14.3554  35
   0   5  23 62.8488 15.0557  35
   0   5  23 38.9367 19.9941   7
   0  -5 -23 60.9811 14.2567  21
   0   5  24 15.1860 11.2183  35
   0   5  24 1.04438 8.93434  13
   0  -5 -24 0.30312 10.6202  21
   0   5  25-2.79354 9.04004  35
   0   5  25 6.51779 6.54650  13
   0  -5 -25 6.49817 8.62218  21
   0   5  26 44.6037 8.34305  35
   0  -6  23 7.99356 7.49337  27
   0   6 -23 14.5309 9.61938  21
   0  -6  23 22.8927 12.6540   7
   0   6 -22 19.8578 11.9708  21
   0  -6  22 10.0021 10.3995  27
   0  -6  22 4.43355 13.9695   7
   0  -6  21 18.2117 13.0719  27
   0  -6  21 11.0906 16.0041   7
   0  -6  21 13.3838 10.6617  11
   0  -6  20 115.153 20.9465   7
   0  -6  20 168.355 19.9300  27
   0  -6  20 141.898 15.6793  35
   0  -6  20 106.027 16.6487  11
   0  -6  19 14.0377 13.3174  11
   0  -6  19 13.9491 11.3742  35
   0  -6  19 2.84982 15.8833   7
   0  -6  19-6.92896 16.3873  27
   0  -6  18 0.61676 14.3253   8
   0  -6  18-23.7094 17.0263  27
   0  -6  18 3.37467 12.4860  35
   0  -6  18-24.8536 17.2269   7
   0  -6  18-3.92085 13.6181  11
   0  -6  17 191.325 20.8464  11
   0  -6  17 187.980 23.4929  25
   0  -6  17 159.404 26.2049   7
   0  -6  17 228.100 23.8337  27
   0  -6  17 172.932 20.4885  35
   0  -6  16 10.1847 15.9704   8
   0  -6  16 10.1553 16.7826  27
   0  -6  16 1.84796 13.2013  35
   0  -6  16 0.75180 18.2839   7
   0  -6  16-1.93623 15.6582  25
   0  -6  15 63.3826 17.8045  25
   0  -6  15 70.4277 19.8787   7
   0  -6  15 68.8183 14.4975  35
   0  -6  15 58.3701 17.4985   8
   0  -6  15 72.5283 17.6478  27
   0  -6  14 159.686 21.4828   8
   0  -6  14 162.330 16.6349  18
   0  -6  14 177.509 21.0496  27
   0  -6  14 194.205 24.2979   7
   0  -6  14 159.442 18.9244  35
   0  -6  14 143.042 19.3195  23
   0  -6  14 152.685 22.4622  25
   0  -6  13 12.3534 14.7215  25
   0  -6  13-5.55037 14.3697   8
   0  -6  13-9.48567 11.6815  23
   0  -6  13 7.96154 10.9666  35
   0  -6  13 13.5750 12.8429  27
   0  -6  13 0.62633 14.4798   7
   0  -6  12-15.7546 14.6020  25
   0  -6  12-10.9147 12.3949  27
   0  -6  12-2.30604 14.3430   7
   0  -6  12-6.26068 10.7091  35
   0  -6  12-14.0594 11.2805  23
   0  -6  11 538.194 38.4116   7
   0  -6  11 396.079 33.9611  35
   0  -6  11 463.932 34.0467  23
   0  -6  11 442.222 34.7946  27
   0  -6  11 390.756 34.0432  34
   0  -6  11 433.254 37.3847  25
   0  -6  10 39.0882 9.84358  23
   0   6 -10-1.22550 14.1920   2
   0  -6  10 53.0670 14.8348   7
   0  -6  10 31.6344 11.2954  27
   0  -6  10 22.2094 13.3893  25
   0   6  -9 2474.68 173.727   1
   0  -6   9 2533.87 178.105   3
   0  -6   9 2238.86 168.511   5
   0   6  -9 2401.84 179.696   4
   0   6  -9 2226.62 173.207   2
   0   6  -9 2459.99 176.367   3
   0  -6   9 2648.28 167.749   6
   0   6  -8 141.549 24.5010   3
   0  -6   8 148.662 17.6058   6
   0   6  -8 124.493 25.8578   4
   0  -6   8 101.601 19.3762   5
   0   6  -8 120.380 21.2989   1
   0   6  -8 104.667 21.0207   2
   0  -6   8 152.666 26.5445   3
   0   6  -7 5579.76 372.113   1
   0   6  -7 5430.03 377.544   4
   0  -6   7 5292.41 374.653   3
   0  -6   7 5284.42 373.160   1
   0   6  -7 5253.18 373.858   3
   0  -6   7 6058.06 369.674   6
   0   6  -7 5042.06 372.009   2
   0  -6   6 269.762 29.6019   1
   0   6  -6 247.455 26.9290   2
   0   6  -6 220.072 31.2536   4
   0   6  -6 233.484 27.7808   1
   0  -6   6 265.756 30.0275   3
   0   6  -5 608.338 55.5906   4
   0   6  -5 641.098 51.2471   1
   0  -6   5 673.771 54.0937   3
   0  -6   5 630.569 52.0774   1
   0   6  -5 689.559 52.2179   2
   0  -6   4 2812.99 186.721   1
   0   6  -4 2596.97 190.028   4
   0  -6   4 2700.78 187.733   3
   0   6  -4 2731.60 186.180   1
   0   6  -4 2642.91 186.210   2
   0  -6   3 39.8281 11.5021   1
   0   6  -3 50.0181 17.5391   4
   0   6  -3 49.3746 11.8363   1
   0  -6   3 17.0141 12.3219   3
   0   6  -2 912.534 65.1362   1
   0   6  -2 868.566 69.1272   4
   0   6  -2 890.133 63.8769   2
   0  -6   2 921.468 66.7268   3
   0  -6   2 871.223 65.1342   1
   0  -6   1 285.654 24.8114   1
   0   6  -1 272.971 24.3117   2
   0  -6   1 274.608 26.6381   3
   0   6  -1 292.401 25.2686   1
   0   6  -1 271.083 29.5113   4
   0  -6   0 111.019 15.7257   3
   0   6   0 87.3790 13.5210   2
   0  -6   0 111.248 14.3144   1
   0   6   0 94.9322 14.2183   1
   0   6   0 105.871 19.1878   4
   0   6   1 2740.87 181.718   2
   0  -6  -1 2889.72 182.631   6
   0  -6  -1 2737.20 183.019   3
   0   6   1 2705.66 186.214   4
   0  -6  -1 2585.49 181.005   2
   0  -6  -1 2780.41 181.844   1
   0   6   1 2322.96 181.457   1
   0  -6  -2 16.3504 12.5846   3
   0   6   2 27.2623 14.4880   4
   0  -6  -2 6.18630 10.4216   6
   0  -6  -2 3.77779 10.0912   2
   0   6   2 14.6465 10.4675   2
   0  -6  -2 9.75658 9.50874   1
   0  -6  -3 42.8158 11.9469   1
   0  -6  -3 30.9839 10.6917   6
   0   6   3 24.3284 13.4158   2
   0  -6  -3 42.6345 12.6334   2
   0  -6  -3 39.9270 12.3961   3
   0   6   3 30.5739 16.1710   4
   0  -6  -4 1116.76 83.0539   3
   0   6   4 1112.21 87.2817   4
   0  -6  -4 1163.20 82.4700   2
   0  -6  -4 1172.74 82.7146   1
   0  -6  -4 1137.37 81.3001   6
   0  -6  -5 286.246 24.0267   6
   0  -6  -5 248.377 26.3337   3
   0  -6  -5 245.320 26.0354   1
   0  -6  -5 270.508 26.9775   2
   0  -6  -6 27.8114 16.8934   4
   0  -6  -6 33.4966 10.6202   6
   0  -6  -7 716.795 55.2549   1
   0  -6  -7 801.958 59.7846   4
   0   6   8 2497.82 172.780   2
   0   6   8 2194.50 173.810   4
   0  -6  -8 2311.25 173.236   4
   0  -6  -8 2587.40 171.381   2
   0  -6  -9 214.010 32.9278   4
   0   6   9 257.116 33.7652   4
   0  -6  -9 259.566 24.6207   5
   0  -6  -9 253.603 30.4334   2
   0   6   9 258.230 31.8577   2
   0   6  10 420.270 44.4560   2
   0  -6 -10 418.968 47.1284   4
   0  -6 -10 466.394 43.1736   3
   0  -6 -10 491.141 43.8282   2
   0  -6 -10 416.269 36.6385   5
   0  -6 -11 42.6076 18.7770   2
   0  -6 -11 23.9366 18.6415   3
   0   6  11 27.4027 17.9610   2
   0  -6 -11 35.6010 22.4470   4
   0  -6 -12 257.553 38.9605   4
   0   6  12 297.218 37.6320   2
   0  -6 -12 287.605 35.0811   3
   0   6  13 1859.34 108.914   7
   0   6  13 1479.36 105.037  27
   0   6  13 1525.65 104.909  35
   0  -6 -13 1420.49 104.413  21
   0   6  13 1488.13 104.053  29
   0  -6 -14 166.127 18.1910  21
   0   6  14 180.897 19.1182  27
   0   6  14 177.715 17.4093  29
   0   6  14 172.506 18.6159  35
   0   6  15 240.258 21.8124  35
   0   6  15 207.522 19.7196  29
   0   6  15 263.119 27.2894   7
   0   6  15 213.262 22.2635  27
   0  -6 -15 197.670 20.6932  21
   0   6  16 112.608 15.6718  35
   0  -6 -16 88.5403 14.9337  21
   0   6  16 79.1318 17.0729  27
   0   6  16 137.155 21.3241   7
   0   6  16 86.3296 13.2749  29
   0   6  17 572.030 45.3473  29
   0  -6 -17 558.273 46.5481  21
   0   6  17 613.242 47.2946  35
   0   6  17 614.910 48.3739  27
   0   6  18 241.850 24.1869  29
   0   6  18 283.196 28.7785  27
   0   6  18 286.381 27.4148  35
   0  -6 -18 251.746 26.3539  21
   0  -6 -19 118.913 19.1876  21
   0   6  19 122.747 15.9142  29
   0   6  19 133.102 24.8153   7
   0   6  19 135.666 20.1442  35
   0   6  20 16.6042 15.6447  35
   0  -6 -20 17.3900 14.0985  21
   0   6  20 26.1231 20.4897   7
   0   6  20 20.5554 10.9650  29
   0   6  21 142.827 20.0711  35
   0   6  21 117.092 25.4631   7
   0  -6 -21 115.751 18.5276  21
   0  -6 -22-12.8078 13.7016  21
   0   6  22-3.92352 15.3762  35
   0   6  22-18.6660 19.0771   7
   0  -6 -23 34.2243 12.6162  21
   0   6  23 2.32430 13.8285  35
   0   6  24 25.0708 10.1957  13
   0   6  24 48.8022 12.8185  35
   0  -6 -24 29.6683 11.5361  21
   0   6  25-10.9797 9.16980  35
   0  -6 -25 0.85541 8.15522  21
   0   6  25 17.9031 7.68561  13
   0   6  26 25.6468 7.82832  35
   0  -7  22-4.97204 8.84522  27
   0  -7  22-7.72059 12.8768   7
   0   7 -22-0.27196 10.2648  21
   0  -7  21 16.5896 11.7778  27
   0  -7  21 17.9140 10.0846  11
   0  -7  21 0.52811 14.2833   7
   0  -7  20 0.61158 14.9275   7
   0  -7  20-4.62462 11.3395  11
   0  -7  20 0.38001 13.8372  27
   0  -7  19 2.03394 16.5188   7
   0  -7  19 55.8153 16.8471  27
   0  -7  19 17.0901 13.2345  11
   0  -7  19 52.3191 11.7767  35
   0  -7  18 92.5280 18.7709  27
   0  -7  18 88.4345 15.9722  11
   0  -7  18 47.6027 19.1541   7
   0  -7  18 77.2274 14.0438  35
   0  -7  18 40.6924 15.8781   8
   0  -7  17 0.50116 17.4359  27
   0  -7  17-6.77481 17.8707   7
   0  -7  17 1.26008 14.5647   8
   0  -7  17-0.40627 13.5602  11
   0  -7  17-4.87394 15.2657  25
   0  -7  17 6.87071 12.2022  35
   0  -7  16 133.937 21.4446  25
   0  -7  16 103.435 16.9670  35
   0  -7  16 66.0642 18.7949   8
   0  -7  16 141.687 21.1185  27
   0  -7  16 70.5951 20.9486   7
   0  -7  15 224.887 27.9588  25
   0  -7  15 222.598 23.6609  35
   0  -7  15 186.992 25.5533   8
   0  -7  15 252.199 29.6132   7
   0  -7  15 272.593 25.6897  27
   0  -7  14-0.44873 11.4903  35
   0  -7  14 2.70256 15.9153  25
   0  -7  14 9.70132 14.5007  27
   0  -7  14-16.2492 16.6419   7
   0  -7  14 15.3957 15.5564   8
   0  -7  13 37.9545 13.2181  35
   0  -7  13 56.6132 17.2707   8
   0  -7  13 46.7970 17.1682   7
   0  -7  13 27.0468 14.4483  27
   0  -7  13 63.7104 18.1463  25
   0  -7  13 53.9516 13.2845  23
   0  -7  12 14.1024 12.7829  27
   0  -7  12 14.8220 11.3151  23
   0  -7  12 25.0886 15.3471   7
   0  -7  12 37.6401 15.9840  25
   0  -7  12 24.8584 11.5334  35
   0  -7  11 901.594 67.1246  25
   0  -7  11 863.216 64.4438  27
   0  -7  11 842.120 63.9434  35
   0  -7  11 862.681 63.3207  23
   0  -7  11 1063.18 67.8910   7
   0  -7  10 139.677 20.9239  25
   0  -7  10 139.835 17.7863  27
   0  -7  10 182.916 21.6948   7
   0  -7  10 128.785 15.9520  35
   0  -7  10 153.502 15.9897  23
   0  -7   9 754.961 58.5019  34
   0  -7   9 1004.79 62.8384   7
   0  -7   9 888.862 58.3294  23
   0  -7   9 832.451 59.2059  27
   0  -7   9 833.288 61.9280  25
   0   7  -9 601.715 64.9862   2
   0   7  -9 748.755 67.6030   1
   0   7  -8 7491.91 610.660   2
   0   7  -8 9305.93 612.225   1
   0  -7   8 9533.04 616.724   3
   0  -7   8 9273.15 614.160   1
   0   7  -8 8835.04 618.859   4
   0   7  -8 9109.16 614.807   3
   0  -7   8 9766.40 608.372   6
   0   7  -7 704.815 58.7464   3
   0  -7   7 702.121 60.0572   3
   0   7  -7 645.115 61.3038   4
   0   7  -7 666.910 55.8252   1
   0  -7   7 743.225 53.9331   6
   0  -7   7 670.022 58.0030   1
   0   7  -7 580.386 54.9532   2
   0   7  -6 336.976 34.7217   2
   0  -7   6 410.693 39.9430   3
   0  -7   6 319.461 36.6154   1
   0   7  -6 417.050 38.9783   3
   0   7  -6 317.084 35.4943   1
   0  -7   6 443.299 34.6199   6
   0   7  -6 405.128 41.9715   4
   0   7  -5 1818.05 133.458   3
   0  -7   5 1863.79 132.512   1
   0   7  -5 1830.29 131.641   2
   0   7  -5 1853.38 131.475   1
   0   7  -5 1801.43 136.837   4
   0  -7   5 1941.10 134.645   3
   0  -7   4 41.9911 15.0816   1
   0   7  -4 42.3761 14.5776   1
   0  -7   4 53.8199 16.5829   3
   0   7  -4 29.1786 17.0611   4
   0   7  -4 23.3959 12.5982   2
   0   7  -4 38.6920 16.1928   3
   0   7  -3 1402.90 100.946   4
   0   7  -3 1319.63 93.2346   2
   0   7  -3 1228.50 96.0265   3
   0  -7   3 1318.25 96.7900   3
   0   7  -3 1312.01 94.7747   1
   0  -7   3 1377.27 95.5686   1
   0   7  -2 221.901 20.4662   2
   0  -7   2 181.675 21.7974   1
   0  -7   2 238.620 23.7396   3
   0   7  -2 205.756 27.0091   4
   0   7  -2 193.530 20.9863   1
   0   7  -2 138.087 21.7499   3
   0   7  -1 70.1055 13.8493   1
   0   7  -1 63.4434 17.9480   4
   0  -7   1 76.6304 13.6918   1
   0   7  -1 42.9916 12.2580   2
   0   7   0 826.263 62.5599   1
   0  -7   0 855.714 62.3963   1
   0  -7   0 869.857 63.9590   3
   0   7   0 861.219 61.8810   2
   0   7   0 804.864 66.8945   4
   0  -7  -1 118.032 17.8001   3
   0  -7  -1 118.863 15.5283   1
   0   7   1 125.527 21.9465   4
   0  -7  -1 124.227 16.6692   6
   0   7   1 115.745 16.1866   2
   0   7   1 102.722 16.3093   1
   0  -7  -2 4397.94 293.773   3
   0  -7  -2 4403.09 291.952   2
   0   7   2 4483.11 298.121   4
   0   7   2 4211.85 292.743   2
   0   7   2 4069.17 292.758   1
   0  -7  -2 4237.94 292.337   1
   0  -7  -2 4527.21 293.317   6
   0  -7  -3 476.528 37.8261   2
   0  -7  -3 475.599 39.3236   3
   0  -7  -3 479.927 38.1418   1
   0  -7  -3 485.913 38.0768   6
   0   7   3 480.408 44.0725   4
   0   7   3 415.755 38.7029   2
   0   7   4 417.237 36.9177   2
   0   7   4 377.874 39.8470   4
   0  -7  -4 414.182 34.0783   6
   0  -7  -4 420.806 35.3334   1
   0  -7  -4 414.187 35.2640   2
   0  -7  -4 424.272 36.9618   3
   0  -7  -5 212.328 24.1049   2
   0  -7  -5 225.542 23.5045   1
   0   7   5 188.876 25.3053   2
   0  -7  -5 218.549 25.5143   3
   0  -7  -5 242.961 22.7208   6
   0  -7  -6 49.5936 15.5174   2
   0  -7  -6 29.8265 17.7157   4
   0  -7  -6 35.8443 14.4338   1
   0  -7  -6 35.1654 15.4516   3
   0  -7  -6 30.6184 11.4701   6
   0  -7  -7 1948.53 136.345   2
   0  -7  -7 1850.52 136.045   1
   0  -7  -7 1913.70 140.374   4
   0   7   8 1766.78 138.540   4
   0  -7  -8 1940.66 137.508   4
   0  -7  -8 1761.92 132.798   1
   0  -7  -8 1895.34 133.401   2
   0   7   9 287.964 36.4423   4
   0   7   9 239.412 32.1220   2
   0  -7  -9 272.002 30.5371   2
   0  -7  -9 250.796 34.1748   4
   0  -7 -10 4839.85 321.929   5
   0  -7 -10 4421.83 326.809   1
   0  -7 -10 4831.91 327.709   2
   0   7  10 4506.28 329.382   2
   0  -7 -10 4505.53 331.152   4
   0   7  10 5382.72 335.879   4
   0  -7 -11 78.9035 25.0087   4
   0   7  11 54.1291 20.2708   2
   0  -7 -11 54.5876 18.6764   2
   0  -7 -11 53.4292 19.6692   3
   0   7  12 315.354 25.1473  35
   0  -7 -12 264.294 40.2493   4
   0  -7 -13 84.6470 12.2272  21
   0   7  13 103.984 19.6729   7
   0   7  13 71.5873 12.0984  35
   0   7  13 80.8358 11.5590  29
   0   7  14 10.3364 10.1838  35
   0  -7 -14 3.89881 10.0693  21
   0   7  14-2.01871 11.5097  27
   0   7  14 6.73487 9.29957  29
   0   7  14 10.8844 17.2270   7
   0   7  15 12.7341 12.6585  27
   0   7  15 8.67517 10.0264  29
   0  -7 -15 4.23100 10.2053  21
   0   7  15 32.2240 11.6709  35
   0   7  15 24.3618 18.0873   7
   0   7  16 24.7233 13.0365  35
   0  -7 -16 18.5998 11.8465  21
   0   7  16 26.0344 11.0637  29
   0   7  16 46.0209 19.6292   7
   0   7  17 1401.79 93.6996  29
   0   7  17 1442.04 100.455   7
   0  -7 -17 1209.32 94.2429  21
   0   7  17 1363.39 95.0693  35
   0   7  18 81.1982 13.9821  29
   0   7  18 92.1274 17.5624  35
   0  -7 -18 70.2985 16.2458  21
   0   7  18 89.1517 24.2405   7
   0   7  19 12.6458 11.4740  29
   0   7  19 20.1763 22.6793   7
   0  -7 -19 12.0754 14.3371  21
   0   7  19 14.8050 15.6225  35
   0   7  20 376.279 32.1676  35
   0   7  20 314.574 37.6631   7
   0   7  20 317.707 27.6568  29
   0  -7 -20 333.291 30.4673  21
   0   7  21-45.3827 21.8609   7
   0   7  21 4.41412 10.0354  29
   0   7  21-13.1724 15.6463  35
   0  -7 -21-1.31464 13.4550  21
   0   7  22 59.3865 16.6858  35
   0  -7 -22 41.6918 14.2148  21
   0   7  23 104.551 16.6632  35
   0  -7 -23 67.7387 13.9094  21
   0   7  23 69.6385 13.7105  13
   0   7  24 9.24415 11.4258  35
   0  -7 -24 5.87985 10.0843  21
   0   7  24-3.77779 10.0269  13
   0   7  25 126.992 13.5560  35
   0  -7 -25 102.999 11.3682  21
   0   7  25 72.4847 11.0010  13
   0   7  26 2.38582 4.46574  13
   0   7  26-9.06704 7.80146  35
   0  -8  21 0.46348 12.8933   7
   0  -8  21-14.0974 10.4214  27
   0  -8  21 13.0917 9.00598  11
   0  -8  20 2.77602 14.7093   7
   0  -8  20 5.47685 12.0937  27
   0  -8  20 14.5771 11.2458  11
   0  -8  19-6.36612 11.9314  11
   0  -8  19-1.89580 15.3733   7
   0  -8  19-11.3139 14.9680  27
   0  -8  18 12.7590 13.1515  11
   0  -8  18-1.81410 16.4669  27
   0  -8  18-0.69979 16.1411   7
   0  -8  18 17.0174 10.7034  35
   0  -8  18 0.57180 13.4787   8
   0  -8  17-0.79739 11.5623  35
   0  -8  17 0.61522 14.6811   8
   0  -8  17-7.30956 17.1572  27
   0  -8  17-13.1152 13.9019  11
   0  -8  17 24.4378 15.9592  25
   0  -8  17 0.73505 17.4050   7
   0  -8  16 1.28084 15.9411   8
   0  -8  16 21.7419 17.2827  25
   0  -8  16 27.6953 12.6034  35
   0  -8  16 0.74881 18.2539   7
   0  -8  16 5.56512 16.5416  27
   0  -8  15 25.8296 17.3347   8
   0  -8  15 32.1819 19.1424   7
   0  -8  15 58.5299 14.5810  35
   0  -8  15 61.7025 20.3604  25
   0  -8  15 96.1627 18.6146  27
   0  -8  14 26.0652 16.6414   8
   0  -8  14 20.7299 13.0751  35
   0  -8  14 16.6274 18.0578   7
   0  -8  14 30.9021 16.3388  27
   0  -8  14 26.8119 18.6885  25
   0  -8  13 62.0752 19.2934   7
   0  -8  13 31.7424 13.0382  35
   0  -8  13 53.1508 16.7678  27
   0  -8  13 46.4569 16.5937   8
   0  -8  13 58.5097 19.6242  25
   0  -8  12 78.5516 14.2012  35
   0  -8  12 85.7609 14.2824  23
   0  -8  12 71.4007 19.5467  25
   0  -8  12 61.1513 18.9124   7
   0  -8  12 64.5849 16.1773  27
   0  -8  11-14.1198 16.8493  25
   0  -8  11 1.79337 14.1370   7
   0  -8  11-7.14280 10.1254  23
   0  -8  11 13.9130 10.4585  35
   0  -8  11 10.1179 12.2690  27
   0  -8  10 18.6894 10.7927  34
   0  -8  10 27.2028 16.2015  25
   0  -8  10 26.0659 10.4695  23
   0  -8  10 45.5466 16.0107   7
   0  -8  10 17.7362 11.0839  35
   0  -8   9 1698.51 125.819  34
   0  -8   9 1908.92 129.707  25
   0  -8   9 1716.58 125.945  35
   0  -8   9 1820.04 125.335  23
   0  -8   8 2016.22 139.663  34
   0  -8   8 2388.14 143.666  25
   0   8  -8 1676.82 146.477   2
   0   8  -8 1980.96 148.618   1
   0  -8   8 2111.15 145.076   6
   0  -8   8 2032.02 150.934   1
   0   8  -7 2509.97 172.474   1
   0  -8   7 2538.04 174.254   1
   0  -8   7 2597.36 169.827   6
   0   8  -7 2235.66 178.277   4
   0   8  -7 2363.98 174.865   3
   0  -8   7 2550.11 176.184   3
   0   8  -7 2097.44 170.932   2
   0   8  -6 18.9410 18.7158   3
   0  -8   6 6.92896 16.4574   1
   0  -8   6 13.8145 17.2759   3
   0   8  -6 21.9063 13.2983   2
   0   8  -6 6.11936 18.8641   4
   0   8  -6 15.9210 14.4346   1
   0  -8   6-8.34581 13.5841   6
   0   8  -5 780.971 65.2013   3
   0   8  -5 724.058 59.4264   2
   0   8  -5 718.916 61.8885   2
   0  -8   5 806.916 64.7147   1
   0  -8   5 776.152 66.0428   3
   0   8  -5 845.302 70.0585   4
   0   8  -5 858.992 63.4589   1
   0  -8   5 914.634 62.9719   6
   0  -8   4 708.436 55.7711   3
   0   8  -4 626.621 54.1346   3
   0   8  -4 607.867 58.0676   4
   0   8  -4 555.227 48.9990   2
   0   8  -4 673.298 52.5390   1
   0  -8   4 769.488 53.6657   6
   0  -8   4 647.598 52.9991   1
   0   8  -4 633.335 51.9466   2
   0   8  -3 899.402 73.6567   4
   0  -8   3 872.389 67.7948   1
   0   8  -3 887.169 67.5509   1
   0  -8   3 968.736 68.2481   6
   0   8  -3 856.293 69.4890   3
   0  -8   3 950.500 70.1372   3
   0   8  -3 809.260 64.6438   2
   0   8  -2 2235.32 165.209   4
   0   8  -2 2218.43 159.603   1
   0   8  -2 2214.82 161.228   3
   0  -8   2 2480.56 160.915   6
   0  -8   2 2397.08 161.894   3
   0  -8   2 2387.73 160.204   1
   0   8  -2 2166.34 157.838   2
   0  -8   1 168.455 22.8715   6
   0   8  -1 188.797 20.2709   2
   0   8  -1 189.818 23.0323   3
   0  -8   1 199.547 25.5487   4
   0   8  -1 176.650 27.7804   4
   0   8  -1 184.084 21.6510   1
   0  -8   1 190.468 23.9761   3
   0  -8   1 184.045 21.0133   1
   0   8   0 657.920 55.2915   4
   0   8   0 607.286 48.4859   2
   0   8   0 649.120 49.9797   1
   0  -8   0 658.317 51.6421   3
   0  -8   0 648.326 49.5283   1
   0   8   0 583.459 50.7816   3
   0  -8  -1 500.578 40.4419   3
   0  -8  -1 488.503 38.5224   1
   0   8   1 455.388 40.4635   3
   0   8   1 445.808 37.8522   2
   0   8   1 421.706 43.3572   4
   0   8   1 478.047 39.4509   1
   0  -8  -1 425.339 39.0967   6
   0   8   2 515.521 46.3166   4
   0   8   2 468.700 39.9320   2
   0   8   2 414.654 40.6623   3
   0   8   2 461.345 40.6034   1
   0  -8  -2 520.279 41.4360   3
   0  -8  -2 485.912 38.7979   2
   0  -8  -2 537.708 41.3053   6
   0  -8  -2 487.062 39.3436   1
   0  -8  -3 1732.19 117.950   3
   0  -8  -3 1605.29 115.947   1
   0  -8  -3 1619.88 116.541   6
   0   8   3 1542.96 116.508   2
   0  -8  -3 1736.48 115.772   2
   0   8   3 1599.47 121.929   4
   0  -8  -4 419.117 36.3787   3
   0   8   4 402.551 41.3164   4
   0  -8  -4 388.904 34.4422   2
   0   8   4 387.476 36.2057   2
   0  -8  -4 405.923 35.1792   1
   0  -8  -4 381.876 34.6933   6
   0  -8  -5 1065.79 78.7970   2
   0  -8  -5 1087.73 79.3707   1
   0  -8  -5 1046.59 80.2308   3
   0  -8  -5 1077.84 84.1762   4
   0   8   5 1055.98 80.6658   2
   0  -8  -5 1042.78 78.0543   6
   0  -8  -6 661.894 56.3928   3
   0  -8  -6 694.767 54.1055   6
   0  -8  -6 692.676 55.2706   2
   0  -8  -6 676.923 60.2394   4
   0  -8  -6 740.697 56.2072   1
   0   8   6 668.126 57.2545   2
   0  -8  -7 507.897 45.1174   3
   0   8   7 423.026 45.0661   2
   0  -8  -7 520.057 43.9734   2
   0  -8  -7 520.106 44.5543   1
   0  -8  -7 495.176 48.6855   4
   0  -8  -8 281.301 36.2915   4
   0   8   8 237.564 37.4947   4
   0  -8  -8 243.623 31.6943   3
   0  -8  -8 306.904 33.4611   1
   0  -8  -8 379.959 33.5921   2
   0  -8  -9 4928.46 348.990   4
   0  -8  -9 5005.31 344.019   2
   0   8   9 5143.53 351.542   4
   0  -8  -9 4938.53 344.174   1
   0  -8 -10 5203.56 357.575   2
   0   8  10 5602.24 366.439   4
   0  -8 -10 4938.68 362.149   4
   0  -8 -10 5077.15 357.873   1
   0  -8 -11 339.560 43.8453   4
   0  -8 -11 318.934 38.5189   1
   0  -8 -11 361.594 38.2258   2
   0   8  11 347.172 40.7208   2
   0   8  12 396.223 31.4801  35
   0   8  12 410.235 31.1021  29
   0  -8 -13 532.164 42.5883  21
   0   8  13 648.095 49.1944   7
   0   8  13 578.823 42.5517  29
   0   8  13 606.057 43.7253  35
   0   8  14 1.55341 9.66693  29
   0   8  14 1.48172 17.7738   7
   0  -8 -14 13.1930 10.0567  21
   0   8  14 5.09041 10.2760  35
   0  -8 -15 18.8542 10.7115  21
   0   8  15 4.93177 9.66754  29
   0   8  15 15.5667 10.9170  35
   0   8  15 25.5832 19.8656   7
   0   8  16 18.0274 11.2674  29
   0   8  16 21.0572 12.1184  35
   0   8  16 8.54663 19.2007   7
   0  -8 -16 25.9082 11.9593  21
   0  -8 -17 17.7598 12.9816  21
   0   8  17 33.4856 14.6654  35
   0   8  17 34.7888 11.9378  29
   0   8  17 17.1491 21.6427   7
   0   8  18-27.3598 16.7004  35
   0   8  18-21.3122 22.4651   7
   0   8  18 10.9234 12.1657  29
   0  -8 -18-16.1788 14.1762  21
   0  -8 -19 26.3700 14.4366  21
   0   8  19 27.5818 12.4531  29
   0   8  19 11.7962 21.5744   7
   0   8  19 51.9763 16.5159  35
   0  -8 -20 244.445 25.1190  21
   0   8  20 250.998 26.6445  35
   0   8  20 253.700 22.8759  29
   0   8  21 26.0923 10.8479  29
   0  -8 -21 10.1912 13.3231  21
   0   8  21 17.3668 15.8105  35
   0   8  22 33.0605 15.7597  35
   0  -8 -22 20.0419 12.3626  21
   0   8  23 111.593 16.8036  35
   0  -8 -23 68.3882 13.5607  21
   0   8  23 72.9326 14.1655  13
   0  -8 -24 71.6981 11.5010  21
   0   8  24 87.3787 14.2840  35
   0   8  24 42.1832 11.7144  13
   0   8  25 27.4865 8.68530  13
   0   8  25 27.4397 10.3617  35
   0   8  26-5.03216 4.56289  15
   0   8  26 2.14030 8.05582  35
   0   8  26 5.60370 5.09213  13
   0  -9  21 4.92339 8.53775  27
   0  -9  21 14.9743 7.64584  11
   0  -9  21-9.57646 12.1775   7
   0  -9  20 2.69497 11.0404  27
   0  -9  20 0.49871 13.7550   7
   0  -9  20-4.52520 10.1456  11
   0  -9  19 22.2781 11.7790  11
   0  -9  19 20.8676 14.0361  27
   0  -9  19 22.1912 15.6396   7
   0  -9  18-3.75588 12.9241  11
   0  -9  18-0.42248 15.0245  27
   0  -9  18 0.53559 12.3152   8
   0  -9  18-11.1128 16.3235   7
   0  -9  17-0.70433 16.1719   7
   0  -9  17 2.95414 13.9554   8
   0  -9  17 5.13214 15.4246  25
   0  -9  17 6.52384 16.5046  27
   0  -9  16 34.1082 12.8838  35
   0  -9  16 45.0474 18.3672  27
   0  -9  16 28.9296 16.7590   8
   0  -9  16 4.44681 17.8052   7
   0  -9  16 41.5379 18.7713  25
   0  -9  15-0.74875 18.9387   7
   0  -9  15-26.5447 16.3583   8
   0  -9  15 8.40601 19.0252  25
   0  -9  15-1.29291 11.8810  35
   0  -9  15-2.54227 16.6947  27
   0  -9  14 80.5536 20.2646   8
   0  -9  14 123.784 23.9372   7
   0  -9  14 115.665 17.2295  35
   0  -9  14 158.947 21.4330  27
   0  -9  14 127.035 23.8006  25
   0  -9  13 59.5589 18.1819  27
   0  -9  13 25.3622 14.4714  35
   0  -9  13 66.4664 20.4641   7
   0  -9  13 71.4561 20.9230  25
   0  -9  12 43.3067 18.7514   7
   0  -9  12 66.0525 20.7073  25
   0  -9  12 32.1030 13.0170  35
   0  -9  12 37.0632 16.5932  27
   0  -9  11 692.024 51.5669   7
   0  -9  11 599.325 45.9419  23
   0  -9  11 678.964 52.2434  25
   0  -9  11 582.699 47.0045  35
   0  -9  10 30.0235 15.7085   7
   0  -9  10 22.5641 9.90369  23
   0  -9  10 33.9607 11.2848  35
   0  -9  10 42.1461 18.1650  25
   0  -9   9 879.399 64.7571  34
   0  -9   9 847.847 63.6268  23
   0  -9   9 833.721 64.6760  35
   0  -9   9 1012.45 69.3034  25
   0  -9   8 838.394 60.9727  23
   0  -9   8 771.321 61.8203  34
   0  -9   8 875.391 66.1304  25
   0  -9   7 30.6648 19.8632   1
   0  -9   7 15.7204 14.4770   6
   0  -9   7 15.1111 14.5378   7
   0  -9   7 16.1059 9.51080  34
   0  -9   7 21.0677 14.3768  25
   0   9  -7 11.9539 16.2832   1
   0  -9   6 203.694 23.4485   6
   0   9  -6 142.922 21.2473   2
   0   9  -6 151.926 26.7830   3
   0   9  -6 146.656 31.1965   4
   0  -9   6 172.525 16.6002  16
   0  -9   6 137.263 26.2405   1
   0   9  -6 155.949 23.4988   1
   0  -9   6 182.817 28.6988   3
   0   9  -6 146.196 18.8279   2
   0   9  -5 5.76303 17.3812   3
   0   9  -5 27.4143 15.3311   1
   0  -9   5 27.0183 18.5987   3
   0  -9   5 18.8998 16.9279   1
   0   9  -5 32.6062 14.0081   2
   0   9  -5 25.9221 22.4821   4
   0   9  -5 34.4352 10.7767   2
   0  -9   5 35.5956 14.8759   6
   0  -9   4 951.767 71.1158   3
   0  -9   4 818.357 67.8314   1
   0   9  -4 881.870 67.5201   1
   0  -9   4 1023.35 68.7103   6
   0   9  -4 735.689 65.2845   2
   0   9  -4 839.933 69.8092   3
   0   9  -4 899.353 75.1435   4
   0   9  -4 792.451 63.4666   2
   0  -9   3 1612.66 114.201   3
   0   9  -3 1562.32 118.927   4
   0  -9   3 1529.11 112.290   1
   0   9  -3 1502.65 111.350   1
   0   9  -3 1535.57 113.853   3
   0  -9   3 1750.23 113.055   6
   0   9  -3 1386.82 108.338   2
   0  -9   2 24.1896 15.4142   6
   0   9  -2 26.1228 16.5286   3
   0   9  -2 10.0160 15.2526   1
   0  -9   2 28.7434 15.0593   1
   0   9  -2 2.29376 10.5667   2
   0  -9   2 29.5862 17.3069   3
   0   9  -2 14.9843 19.2980   4
   0   9  -1 3318.82 253.450   2
   0   9  -1 3704.39 257.700   3
   0   9  -1 3674.60 256.004   1
   0  -9   1 4219.59 257.620   6
   0   9  -1 3742.01 262.416   4
   0  -9   1 3818.78 255.869   1
   0  -9   1 3888.49 257.906   3
   0  -9   0 665.780 52.1745   1
   0   9   0 585.917 50.5618   2
   0  -9   0 676.808 58.2565   4
   0   9   0 700.137 55.0945   3
   0   9   0 724.423 59.6032   4
   0   9   0 634.976 52.5572   1
   0  -9   0 657.477 54.0639   3
   0  -9  -1 602.604 50.7388   3
   0   9   1 581.696 50.9641   3
   0   9   1 648.580 56.4077   4
   0   9   1 589.102 48.5370   2
   0  -9  -1 658.614 49.6688   1
   0   9   1 587.079 49.6355   1
   0  -9  -1 660.713 56.2050   4
   0   9   2 114.664 18.7080   2
   0  -9  -2 121.179 20.7504   3
   0  -9  -2 132.677 18.3092   1
   0   9   2 120.712 20.2797   1
   0  -9  -2 129.991 23.1913   4
   0   9   2 125.327 24.2301   4
   0  -9  -2 140.790 20.1087   6
   0  -9  -3 21.3697 13.3595   1
   0   9   3 18.4598 19.0632   4
   0  -9  -3 30.8651 12.6131   2
   0  -9  -3 31.9909 16.5779   4
   0  -9  -3 26.9159 14.1955   6
   0   9   3 22.5409 13.2933   2
   0  -9  -3 26.6141 15.1382   3
   0  -9  -4 4296.10 295.244   6
   0  -9  -4 4444.19 296.749   3
   0  -9  -4 4692.07 302.133   4
   0  -9  -4 4129.07 294.015   2
   0   9   4 4599.00 303.243   4
   0   9   4 4115.20 296.305   2
   0  -9  -4 4281.75 294.870   1
   0   9   5 104.187 20.3587   2
   0  -9  -5 109.133 19.5817   3
   0  -9  -5 115.349 18.7458   1
   0  -9  -5 107.316 18.0099   2
   0  -9  -5 129.936 24.8803   4
   0  -9  -5 114.968 17.8176   6
   0  -9  -6 182.417 24.7756   3
   0   9   6 179.376 25.1681   2
   0  -9  -6 167.660 27.6685   4
   0  -9  -6 172.346 22.8535   2
   0  -9  -6 171.388 23.7948   1
   0  -9  -6 173.104 22.6949   6
   0  -9  -7 50.3830 18.2743   1
   0   9   7-3.53953 18.4627   2
   0  -9  -7 7.39567 14.7839   2
   0  -9  -7 30.4397 19.6193   4
   0  -9  -7 18.7369 16.9180   3
   0   9   8 120.303 30.3015   4
   0  -9  -8 149.535 29.0792   4
   0   9   8 143.206 24.9376   2
   0  -9  -8 148.914 24.4435   1
   0  -9  -8 148.268 25.3110   3
   0  -9  -8 150.373 22.2907   2
   0  -9  -9 7065.71 463.157   1
   0   9   9 6899.06 470.891   4
   0  -9  -9 6611.01 467.813   4
   0  -9  -9 6713.77 463.287   3
   0   9   9 6416.00 464.733   2
   0  -9  -9 6867.80 462.305   2
   0  -9 -10 148.737 26.4299   1
   0  -9 -10 156.080 26.8270   3
   0  -9 -10 127.528 29.5736   4
   0  -9 -10 144.965 23.7168   2
   0   9  10 118.493 30.9765   4
   0  -9 -11 2026.04 174.398   4
   0   9  11 2378.49 157.968  29
   0   9  12 721.119 51.8272  29
   0  -9 -13 699.573 52.1805  21
   0   9  13 744.635 52.2583  29
   0   9  14 968.479 66.9491  29
   0   9  14 962.337 68.0009  35
   0  -9 -14 901.733 67.1115  21
   0  -9 -15 27.0446 11.1876  21
   0   9  15 26.6656 12.7249  35
   0   9  15 26.0379 11.1064  29
   0   9  16 15.4961 13.5890  35
   0  -9 -16 16.4030 11.8866  21
   0   9  16 33.0136 12.6307  29
   0  -9 -17 531.410 44.8308  21
   0   9  17 610.870 44.4332  29
   0   9  17 624.231 46.5115  35
   0  -9 -18 26.5258 13.7171  21
   0   9  18 31.9736 16.2959  35
   0   9  18 57.0562 13.2839  29
   0   9  19 850.763 62.8140  29
   0   9  19 906.761 65.4223  35
   0  -9 -19 874.064 64.0770  21
   0  -9 -20 265.715 24.8222  21
   0   9  20 252.239 27.2090  35
   0   9  20 235.178 22.8447  29
   0   9  21 26.4876 10.9552  29
   0   9  21 17.2523 15.6922  35
   0  -9 -21 13.8610 12.6408  21
   0  -9 -22 289.884 27.0010  21
   0   9  22 274.873 27.8428  13
   0   9  22 334.220 25.4227  29
   0   9  22 364.515 29.8118  35
   0   9  23 44.4899 14.1926  35
   0  -9 -23 27.8223 11.2803  21
   0   9  23 17.7166 12.3934  13
   0   9  24 100.800 13.9154  35
   0   9  24 59.0409 12.6303  13
   0   9  25 12.0245 9.53228  35
   0   9  25 3.79015 6.62341  15
   0   9  25 5.88107 8.24149  13
   0 -10  20 13.9127 12.9371   7
   0 -10  20 10.2984 9.66654  27
   0 -10  20 9.30481 8.68802  11
   0 -10  19 5.15053 14.5434   7
   0 -10  19 2.90090 11.5680  27
   0 -10  19 0.76439 10.0725  11
   0 -10  18 0.59482 14.0210   7
   0 -10  18-1.24891 12.1959  11
   0 -10  18 0.98050 12.3666   8
   0 -10  18-33.4478 14.6854  27
   0 -10  17 4.79890 15.5267  27
   0 -10  17 4.44517 13.9999   8
   0 -10  17 37.7698 13.8453  11
   0 -10  17 7.24688 17.2763   7
   0 -10  17 25.4536 15.6307  25
   0 -10  16-24.2535 17.5155  27
   0 -10  16-22.7544 18.0309   7
   0 -10  16-19.4025 17.4074  25
   0 -10  16 0.60640 14.6528   8
   0 -10  15 67.3612 21.0229  25
   0 -10  15 49.1771 18.6899   8
   0 -10  15 85.0104 19.2832  27
   0 -10  15 60.2757 20.5790   7
   0 -10  14 27.5562 17.0410  27
   0 -10  14 5.15776 19.9754  25
   0 -10  14-32.0304 19.4168   7
   0 -10  14 24.0030 12.5812  35
   0 -10  14 0.65450 15.2220   8
   0 -10  13 206.590 23.6067  35
   0 -10  13 271.102 30.7204  25
   0 -10  13 161.412 28.6917   7
   0 -10  13 304.581 27.6642  27
   0 -10  12 570.499 46.1904  25
   0 -10  12 539.276 44.8076   7
   0 -10  12 435.011 39.0237  35
   0 -10  11 271.415 27.1372  35
   0 -10  11 324.600 32.9446   7
   0 -10  11 374.340 35.0652  25
   0 -10  10 35.7316 16.9084   7
   0 -10  10 39.6449 10.6567  23
   0 -10  10 16.3589 11.4952  35
   0 -10  10 36.2926 19.3358  25
   0 -10   9 9.62524 9.95375  35
   0 -10   9 12.5528 9.00835  23
   0 -10   9 4.73331 16.0990  25
   0 -10   9 35.6910 15.7557   7
   0 -10   8 238.766 26.2243  25
   0 -10   8 256.585 25.0407   7
   0 -10   7 103.722 14.2128  34
   0 -10   7 116.797 20.5133  25
   0 -10   7 144.517 19.9124   7
   0 -10   6 3.71393 8.07603  34
   0 -10   6-11.7178 14.3992  25
   0 -10   6-9.88016 18.0330   1
   0 -10   6 6.02622 13.6782   6
   0  10  -6-16.7898 17.3219   1
   0 -10   6-17.6204 14.0983   7
   0 -10   6 5.14265 9.10207  16
   0  10  -5 13.7333 12.3849   2
   0 -10   5 1.79727 8.47193  16
   0 -10   5 22.6113 19.6902   3
   0  10  -5 9.66503 8.72310   2
   0 -10   5 6.97096 13.7816   6
   0  10  -5 4.16765 14.6905   1
   0 -10   5 23.5610 13.3876   7
   0 -10   5 3.35919 17.6481   1
   0 -10   5-1.00461 10.2962  26
   0  10  -4-16.6205 16.0685   1
   0  10  -4 10.5058 20.0721   4
   0 -10   4-12.2371 17.3390   1
   0  10  -4-19.5238 20.1092   3
   0 -10   4 8.80762 14.1409   6
   0 -10   4-3.66147 18.8864   3
   0  10  -4 1.85813 11.8278   2
   0  10  -4 17.5127 10.2630   2
   0  10  -3 33.0758 22.4995   4
   0  10  -3 36.5637 18.6573   3
   0 -10   3 23.6256 16.0416   1
   0 -10   3 24.2167 20.6036   4
   0 -10   3 38.2710 17.1202   6
   0  10  -3 26.2935 15.8605   1
   0  10  -3 14.5360 10.7944   2
   0 -10   3 39.4585 19.2485   3
   0  10  -2 1237.13 99.1887   4
   0 -10   2 1421.60 93.7704   6
   0  10  -2 1083.73 87.5892   2
   0  10  -2 1185.21 91.2313   1
   0  10  -2 1125.05 93.2008   3
   0 -10   2 1270.36 92.0345   1
   0 -10   2 1291.50 94.3514   3
   0  10  -1 992.211 81.2368   2
   0 -10   1 1298.21 86.6193   6
   0 -10   1 1219.12 87.4010   3
   0  10  -1 1115.29 84.3744   1
   0  10  -1 1072.02 91.3184   4
   0  10  -1 1078.92 86.1985   3
   0 -10   1 1112.77 83.9444   1
   0 -10   0 49.2970 21.8353   4
   0 -10   0 101.301 19.0255   6
   0  10   0 72.5834 18.1428   1
   0  10   0 62.7256 22.4676   4
   0  10   0 49.9306 13.5182   2
   0 -10   0 77.3453 17.1527   1
   0 -10   0 74.9233 19.8191   3
   0  10   0 54.4462 19.3853   3
   0  10   1 334.823 33.4274   1
   0  10   1 307.487 30.7292   2
   0  10   1 287.149 34.1418   3
   0 -10  -1 327.120 34.6729   3
   0 -10  -1 350.661 39.4915   4
   0  10   1 361.053 40.5564   4
   0 -10  -1 355.871 32.7883   1
   0 -10  -2-19.7315 15.4426   3
   0 -10  -2 6.17826 14.1832   1
   0 -10  -2-2.75142 16.8709   4
   0 -10  -2 11.1169 14.2057   6
   0  10   2 5.93449 19.7201   4
   0  10   2 0.80186 12.6333   2
   0 -10  -3 241.087 28.5200   6
   0  10   3 237.192 27.3013   2
   0 -10  -3 263.160 33.7370   4
   0  10   3 218.513 34.3025   4
   0 -10  -3 273.850 27.9461   1
   0 -10  -3 318.864 31.0898   3
   0 -10  -4 693.586 62.8652   4
   0 -10  -4 712.503 58.8856   3
   0 -10  -4 699.441 56.8935   1
   0 -10  -4 726.075 57.6437   6
   0  10   4 685.195 57.5463   2
   0  10   4 670.905 64.6015   4
   0 -10  -4 727.895 55.8896   2
   0 -10  -5 37.9010 16.0217   1
   0 -10  -5 38.1699 20.6885   4
   0  10   5 26.5157 15.4825   2
   0 -10  -5 37.4817 13.1574   2
   0 -10  -5 5.85249 13.8932   6
   0 -10  -5 23.1295 16.5794   3
   0 -10  -6-2.65208 12.6867   2
   0 -10  -6 13.5378 13.4498   6
   0 -10  -6 20.1700 17.2595   3
   0  10   6 2.31947 15.5438   2
   0 -10  -6-12.2428 18.5858   4
   0 -10  -6 1.86378 14.9831   1
   0 -10  -7 26.1820 19.0142   3
   0 -10  -7 0.98040 14.4174   2
   0 -10  -7 5.13041 15.9794   1
   0  10   7 8.99370 15.9888   2
   0 -10  -7 3.19216 19.2902   4
   0 -10  -7-0.85999 14.6277   6
   0 -10  -8 4181.86 277.988   1
   0  10   8 4206.51 287.929   4
   0 -10  -8 4144.89 279.172   3
   0 -10  -8 3766.19 276.319   2
   0  10   8 3687.01 279.568   2
   0 -10  -8 4066.87 284.210   4
   0 -10  -9 31.1960 15.9226   2
   0 -10  -9 21.1923 18.6182   3
   0 -10  -9 13.5292 17.9290   1
   0  10   9 26.3500 17.2643   2
   0 -10  -9 48.5105 23.5553   4
   0  10   9 39.0186 25.3731   4
   0  10  10 53.7267 9.74721  29
   0 -10 -10 28.9135 23.4092   4
   0 -10 -10 58.8631 21.4321   3
   0  10  10 47.4465 9.56593  35
   0  10  11 26.8027 9.92353  35
   0  10  11 11.5808 9.87563  29
   0  10  12 147.857 15.9543  29
   0 -10 -13 2.04994 9.18948  21
   0  10  13 14.3695 10.1338  29
   0 -10 -14 385.444 32.1131  21
   0  10  14 430.597 32.4677  29
   0  10  15 78.5143 16.0330  35
   0 -10 -15 104.065 14.4653  21
   0  10  15 91.7882 14.2982  29
   0 -10 -16 231.395 23.5136  21
   0  10  16 275.274 25.8491  35
   0  10  16 259.133 23.6224  29
   0  10  17 149.967 21.0208  35
   0  10  17 168.281 18.3622  29
   0 -10 -17 150.890 18.2101  21
   0  10  18 507.067 41.5041  35
   0 -10 -18 519.976 40.2023  21
   0  10  18 493.783 39.2714  29
   0  10  19 78.9596 17.8230  35
   0 -10 -19 35.4147 14.4361  21
   0  10  19 53.8055 14.1040  29
   0  10  20 259.311 25.1362  35
   0 -10 -20 189.297 21.6087  21
   0  10  20 219.139 21.0170  29
   0 -10 -21 48.8289 13.5423  21
   0  10  21 70.5854 17.3952  35
   0  10  21 71.9186 12.5718  29
   0  10  22 111.111 18.1747  13
   0 -10 -22 99.3421 15.9886  21
   0  10  22 166.726 15.0630  29
   0  10  22 172.956 20.7288  35
   0  10  23 47.4574 14.9679  35
   0  10  23 51.4627 13.2089  13
   0  10  24 0.88537 10.0456  13
   0  10  24 14.0456 11.3727  35
   0  10  25 12.5605 8.37303  13
   0  10  25-0.25462 9.04386  35
   0 -11  19-8.18352 10.1060  27
   0 -11  19 3.85954 9.59222  11
   0 -11  19-14.1952 13.0793   7
   0 -11  18-5.78108 12.8374  27
   0 -11  18 7.41770 11.9651   8
   0 -11  18-0.53182 14.3551   7
   0 -11  18-1.38468 10.8434  11
   0 -11  17 26.6996 14.9742  27
   0 -11  17 39.9773 15.4090  25
   0 -11  17 20.6050 17.0750   7
   0 -11  17 29.0411 14.5628   8
   0 -11  17 62.3871 13.4163  11
   0 -11  16 13.4020 16.6039  27
   0 -11  16 0.66490 15.7339   7
   0 -11  16 0.57063 14.4746   8
   0 -11  16 23.4694 16.4698  25
   0 -11  15 59.7639 18.8827  27
   0 -11  15 68.6774 20.5501  25
   0 -11  15 29.6353 16.3419   8
   0 -11  15 40.1861 20.0999   7
   0 -11  14 24.2298 21.2047  25
   0 -11  14 21.9436 18.8174   7
   0 -11  14 78.0515 18.8650  27
   0 -11  14 12.3032 16.9993   8
   0 -11  13 28.7223 17.7311  27
   0 -11  13 34.6756 22.1519  25
   0 -11  13 0.73278 18.0208   7
   0 -11  12 1060.00 79.6446   7
   0 -11  12 1028.28 80.5608  25
   0 -11  11 138.890 26.9099  25
   0 -11  11 89.1182 21.2887   7
   0 -11  10 164.574 23.8076   7
   0 -11  10 146.938 26.3119  25
   0 -11   9 525.441 47.8270  25
   0 -11   9 553.442 45.6263   7
   0 -11   8 60.8149 19.5483  25
   0 -11   8 71.3967 17.0801   7
   0 -11   7 278.092 29.2602  25
   0 -11   7 336.077 28.8072   7
   0 -11   6 190.887 24.8118  25
   0 -11   6 245.706 24.1299   7
   0 -11   6 155.252 18.1888  34
   0 -11   6 209.186 19.4917  16
   0 -11   5 13.0226 9.92560  16
   0  11  -5-1.50650 7.56828  15
   0 -11   5 1.41952 13.6634   7
   0 -11   5-1.43832 8.51579  34
   0 -11   5 9.08519 15.5866   6
   0 -11   4 530.877 40.3470  26
   0 -11   4 499.626 49.9331   1
   0  11  -4 428.753 42.5922   2
   0 -11   4 507.304 38.8938  34
   0  11  -4 557.917 49.8625   1
   0 -11   4 617.321 40.4694  16
   0 -11   4 612.876 50.3988   6
   0 -11   3 7.51809 16.9222   1
   0 -11   3 4.15216 9.11085  16
   0 -11   3 12.8615 17.5151   3
   0 -11   3 9.27422 9.39643  26
   0 -11   3-0.50333 12.5547  25
   0  11  -3 1.32373 18.1683   3
   0  11  -3-3.25691 15.3558   1
   0 -11   3-6.56508 16.6729   6
   0  11  -3 0.74453 9.04357   2
   0 -11   2 2199.94 157.453   1
   0  11  -2 2239.64 166.726   4
   0  11  -2 2161.57 159.874   3
   0  11  -2 1823.58 152.699   2
   0  11  -2 2269.11 157.742   1
   0 -11   2 2560.26 159.427   6
   0 -11   2 2404.03 161.157   3
   0 -11   1 53.1519 18.4960   6
   0  11  -1 49.1654 20.8633   3
   0  11  -1 63.9997 18.5763   1
   0 -11   1 43.1070 19.9376   3
   0  11  -1 47.7152 23.8735   4
   0  11  -1 39.7542 12.9903   2
   0 -11   1 31.2035 16.8287   1
   0  11   0 175.692 28.7265   3
   0  11   0 183.696 23.0221   2
   0  11   0 222.095 35.5968   4
   0 -11   0 199.766 25.9692   1
   0  11   0 184.013 26.5779   1
   0 -11   0 279.353 29.6985   6
   0 -11   0 208.838 29.3888   3
   0 -11  -1 1666.86 114.600   1
   0 -11  -1 1694.97 122.838   4
   0  11   1 1426.45 114.181   1
   0 -11  -1 1671.12 117.114   3
   0  11   1 1440.79 112.365   2
   0  11   1 1484.38 121.729   4
   0  11   1 1572.89 116.875   3
   0 -11  -2 138.770 23.8708   3
   0  11   2 117.633 28.7409   4
   0  11   2 80.1371 17.7060   2
   0 -11  -2 94.7294 25.0097   4
   0 -11  -2 82.1928 19.5146   1
   0 -11  -2 95.3620 20.5079   6
   0  11   3 336.693 43.1181   4
   0  11   3 273.811 32.1475   2
   0 -11  -3 358.257 35.3982   6
   0 -11  -3 327.562 35.9619   3
   0 -11  -3 338.102 33.4642   1
   0 -11  -3 320.034 39.4605   4
   0  11   4 3061.65 241.546   2
   0  11   4 3564.99 251.461   4
   0 -11  -4 3723.99 249.917   4
   0 -11  -4 3536.29 242.216   6
   0 -11  -4 3568.76 243.564   3
   0 -11  -4 3558.02 241.566   1
   0 -11  -5 12.1757 12.7763   2
   0 -11  -5 24.7826 16.1455   1
   0 -11  -5-3.37323 19.3143   3
   0 -11  -5 37.5751 16.9699   6
   0  11   5 17.6301 15.4269   2
   0 -11  -6 83.3438 19.4179   6
   0 -11  -6 67.9431 20.5422   3
   0 -11  -6 69.8630 19.0538   1
   0 -11  -6 64.4117 16.3381   2
   0  11   6 72.2924 19.9496   2
   0 -11  -6 86.4609 24.1989   4
   0 -11  -7 298.702 35.7547   3
   0 -11  -7 336.397 35.3973   1
   0 -11  -7 294.409 40.0153   4
   0 -11  -7 319.632 33.2481   2
   0  11   7 322.902 36.6886   2
   0 -11  -8 1208.59 98.6228   2
   0  11   8 1394.70 111.558   4
   0 -11  -8 1391.52 101.375   1
   0 -11  -8 1320.65 107.833   4
   0  11   8 1197.15 102.491   2
   0 -11  -8 1390.29 102.878   3
   0  11   9 168.865 15.8946  29
   0  11   9 150.480 15.5917  35
   0  11  10 261.908 23.1250  29
   0  11  10 272.463 22.6929  12
   0  11  10 306.761 24.0146  35
   0  11  11 4676.46 304.552  29
   0  11  11 4376.39 303.830  12
   0  11  11 4592.98 305.123  35
   0  11  12 954.804 66.3982  35
   0  11  12 899.110 64.7539  12
   0  11  13 56.7315 11.9557  29
   0  11  13 45.7143 10.8581  12
   0  11  14 232.685 21.2432  12
   0  11  14 247.856 22.6877  29
   0 -11 -14 241.370 22.2473  21
   0 -11 -15 20.3292 11.1612  21
   0  11  15 20.6989 10.4951  12
   0  11  15 35.9140 12.0418  29
   0 -11 -16 192.097 20.2105  21
   0  11  16 227.669 20.7691  29
   0  11  16 173.926 18.6915  12
   0  11  17 26.8930 14.3181  35
   0 -11 -17 3.35624 11.2142  21
   0  11  17-5.02457 10.3965  12
   0  11  17 5.13161 12.3100  29
   0  11  18 385.633 33.7986  12
   0  11  18 501.372 38.1900  35
   0  11  18 479.783 35.6491  29
   0 -11 -18 431.303 35.6860  21
   0  11  19 754.775 53.7282  29
   0  11  19 846.646 56.7155  35
   0  11  20-5.30590 15.1153  35
   0  11  20 32.1208 11.7376  29
   0 -11 -20 0.39694 11.4942  21
   0  11  21 390.203 33.8610  35
   0  11  21 420.286 30.3739  29
   0 -11 -21 324.615 30.5783  21
   0  11  22 37.9219 9.74280  29
   0  11  22-3.32455 14.9321  35
   0  11  22-3.32292 12.6301  13
   0  11  23 22.4058 12.0953  13
   0  11  23 15.7488 13.3651  35
   0  11  23 0.67859 8.59699  15
   0  11  24 44.4010 11.7764  13
   0  11  24 82.6517 13.4358  35
   0  11  25 8.10957 8.86167  35
   0  11  25 8.79431 8.29156  13
   0 -12  19-8.98200 11.2664   7
   0 -12  19-4.33496 8.42606  27
   0 -12  19-10.5196 8.08023  11
   0 -12  18-2.27982 12.6243   7
   0 -12  18-5.78037 11.1320  27
   0 -12  18 8.48217 9.80914  11
   0 -12  17 0.45313 12.1576   8
   0 -12  17 13.4201 12.8073  25
   0 -12  17-9.16754 14.7117   7
   0 -12  17 15.5173 13.4603  27
   0 -12  17 17.6208 11.6375  11
   0 -12  16 71.8153 17.3250  27
   0 -12  16 41.4028 17.0341  25
   0 -12  16 34.0112 15.3089   8
   0 -12  16 86.4872 19.5902   7
   0 -12  15 0.66375 16.8665   7
   0 -12  15 16.3220 16.3303  27
   0 -12  15 7.59340 17.9036  25
   0 -12  15 0.58245 14.2561   8
   0 -12  14 28.7010 18.6147   7
   0 -12  14 41.9790 20.8831  25
   0 -12  14 59.8725 18.3209  27
   0 -12  14 27.5638 16.6463   8
   0 -12  13 367.057 30.9280  27
   0 -12  13 334.008 35.0492  25
   0 -12  13 322.546 33.1448   7
   0 -12  12 29.5112 22.9164  25
   0 -12  12 17.3797 19.1286   7
   0 -12  11 81.7670 21.4076   7
   0 -12  11 135.853 26.5555  25
   0 -12  10 0.68966 17.1867   7
   0 -12  10 18.5200 22.3415  25
   0 -12   9 3.14192 19.9853  25
   0 -12   9 25.6935 16.2162   7
   0 -12   8 251.810 27.7649   7
   0 -12   8 251.281 31.2355  25
   0 -12   7 156.693 24.6859  25
   0 -12   7 156.052 21.9860   7
   0 -12   6 3.87186 15.2045   7
   0 -12   6 23.4433 11.9069  16
   0 -12   5 408.799 33.8640  16
   0 -12   5 452.646 37.1984   7
   0  12  -4 114.278 12.4013  15
   0 -12   4 91.4619 12.7344  34
   0 -12   4 129.898 19.9379  25
   0 -12   4 124.909 15.1654  16
   0 -12   3 341.173 29.2666  26
   0  12  -3 401.836 27.6303  15
   0 -12   3 426.880 33.5543  25
   0 -12   3 410.532 29.4189  16
   0 -12   2 256.624 24.4982  25
   0  12  -2 191.519 29.7968   1
   0 -12   2 222.504 20.8768  26
   0 -12   2 214.625 30.3139   1
   0  12  -2 174.892 23.2698   2
   0 -12   2 259.737 21.0458  16
   0  12  -2 219.533 19.6070  12
   0 -12   1 368.866 40.1312   1
   0 -12   1 476.243 34.7056  25
   0 -12   1 358.663 31.1705  26
   0  12  -1 392.515 41.2554   1
   0 -12   1 355.586 32.9575  24
   0 -12   1 369.329 42.9966   3
   0 -12   1 474.978 31.9964  16
   0  12  -1 442.889 31.0025  12
   0 -12   1 409.368 31.7463  27
   0  12  -1 293.995 34.7816   2
   0 -12   0 108.235 15.5468  25
   0 -12   0 110.536 23.5776   6
   0 -12   0 93.3331 20.6362   1
   0 -12   0 73.9400 22.5353   3
   0  12   0 60.1394 22.4677   3
   0 -12   0 95.5354 13.1315  27
   0  12   0 79.5637 16.5211   2
   0  12   0 81.1480 11.9144  12
   0 -12   0 106.567 13.1538  16
   0 -12   0 101.196 14.6361  24
   0  12   0 93.0269 21.6882   1
   0  12   1 189.019 34.9417   4
   0  12   1 216.543 29.0705   1
   0  12   1 195.481 30.1704   3
   0 -12  -1 195.552 26.8052   1
   0  12   1 158.876 23.3054   2
   0 -12  -1 196.230 29.7297   3
   0 -12  -1 187.592 28.3555   6
   0 -12  -1 191.408 33.2630   4
   0  12   2 891.324 75.8085   1
   0 -12  -2 1072.29 84.6543   4
   0  12   2 978.545 84.8381   4
   0 -12  -2 970.631 74.7775   1
   0 -12  -2 1059.30 78.7304   3
   0  12   2 792.985 72.4580   2
   0 -12  -3 270.381 36.9976   4
   0  12   3 228.081 28.1083   2
   0  12   3 224.497 37.1718   4
   0 -12  -3 259.231 31.6672   6
   0 -12  -3 281.771 33.3294   3
   0 -12  -3 245.409 30.1718   1
   0 -12  -4 499.905 46.3754   6
   0  12   4 428.308 44.8880   2
   0 -12  -4 519.096 45.5963   1
   0 -12  -4 546.855 54.3516   4
   0  12   4 439.430 53.6939   4
   0 -12  -4 513.955 48.1158   3
   0 -12  -5 345.622 34.5740   2
   0  12   5 278.473 36.0084   2
   0 -12  -5 376.842 44.9988   4
   0 -12  -5 391.114 37.6579   1
   0 -12  -5 359.032 39.1729   3
   0 -12  -5 429.603 39.3773   6
   0 -12  -6 102.436 22.9888   3
   0  12   6 96.4727 20.9568   2
   0 -12  -6 122.475 23.2134   6
   0 -12  -6 103.402 18.9373   2
   0 -12  -6 112.247 13.3322  31
   0 -12  -6 113.154 22.0182   1
   0 -12  -6 140.739 28.3312   4
   0  12   6 120.850 12.7657  29
   0 -12  -7 552.801 51.9971   3
   0  12   7 510.761 51.3353   2
   0 -12  -7 518.174 40.0995  31
   0 -12  -7 531.100 49.8513   1
   0  12   7 580.809 39.6386  29
   0 -12  -7 473.434 46.9635   2
   0  12   8 36.2401 9.48613  12
   0  12   8 45.0303 9.94623  29
   0  12   8 31.6766 10.0623  13
   0 -12  -8 57.2451 10.5138  31
   0  12   8 28.0059 9.23641  35
   0  12   9 279.279 22.6696  12
   0  12   9 288.654 22.9378  29
   0  12   9 263.374 23.3421  13
   0  12   9 255.245 23.1468  35
   0  12  10 4279.57 275.125  29
   0  12  10 3977.95 275.504  35
   0  12  10 4157.98 274.574  12
   0  12  10 3903.99 275.304  13
   0  12  11 476.578 36.1546  29
   0  12  11 472.349 36.9474  13
   0  12  11 464.950 35.5807  12
   0  12  11 464.985 36.6076  35
   0  12  12 20.4615 10.8904  29
   0  12  12 7.65179 9.32801  12
   0  12  12 4.00191 10.7261  35
   0  12  13 232.661 23.5021  35
   0  12  13 238.511 21.3955  12
   0  12  13 256.379 22.8236  29
   0  12  14 180.908 18.3729  12
   0  12  14 195.420 20.3168  29
   0  12  15 540.691 40.8842  29
   0  12  15 516.563 39.5392  12
   0  12  16 0.31401 10.2768  12
   0  12  16 24.4052 13.0062  29
   0 -12 -16 19.0471 11.7092  21
   0  12  17 227.503 21.8321  29
   0 -12 -17 198.069 20.9362  21
   0  12  17 204.926 20.0089  12
   0  12  18 504.331 41.6616  35
   0  12  18 492.507 41.6356  13
   0 -12 -18 456.210 39.2206  21
   0  12  18 564.344 39.8939  29
   0 -12 -19 92.6744 15.2382  21
   0  12  19 116.893 19.2039  35
   0  12  19 124.822 15.8907  29
   0  12  19 71.4046 17.2948  13
   0  12  20 85.9619 18.9971  35
   0  12  20 134.785 15.8566  29
   0  12  21 20.9850 16.9771  35
   0  12  21 56.0382 12.0461  29
   0  12  22-6.84228 13.8370  35
   0  12  22 24.3128 9.44288  29
   0  12  22-5.11293 8.62896  15
   0  12  23 7.03756 12.4935  35
   0  12  23 8.18624 11.5384  13
   0  12  23 20.7465 7.77298  29
   0  12  24 0.81881 9.47866  13
   0  12  24-1.46849 10.6052  35
   0  12  25 62.9026 10.7826  35
   0  12  25 74.1191 10.1802  13
   0 -12 -25 91.6867 10.8666  31
   0 -13  18-9.76781 8.57636  11
   0 -13  18-5.32545 8.89653  27
   0 -13  18 7.70897 11.2868   7
   0 -13  17 5.43459 11.7997   8
   0 -13  17 10.0441 10.0676  11
   0 -13  17 9.49472 13.3667   7
   0 -13  17 0.30025 11.3596  27
   0 -13  16 9.75356 13.8513  27
   0 -13  16 7.80965 14.5451  25
   0 -13  16 6.37345 14.4568   7
   0 -13  16 2.32407 12.4905   8
   0 -13  15 86.9329 19.7209   7
   0 -13  15 95.8320 19.8151  25
   0 -13  15 107.278 18.5775  27
   0 -13  15 85.6538 17.5206   8
   0 -13  14-0.65526 17.8131   7
   0 -13  14 14.6398 16.7155  27
   0 -13  14 3.34227 19.6052  25
   0 -13  14 0.58869 15.2597   8
   0 -13  13 74.3988 21.5342   7
   0 -13  13 85.1559 20.3193   8
   0 -13  13 140.027 25.4901  25
   0 -13  12 81.7496 21.9446   7
   0 -13  12 136.795 26.9650  25
   0 -13  11-13.1563 23.1114  25
   0 -13  11 2.13858 17.2937   7
   0 -13  10 206.472 28.9816   7
   0 -13  10 281.153 34.6466  25
   0 -13   9-4.94717 22.2710  25
   0 -13   9 35.5806 18.0088   7
   0 -13   8 0.65719 14.7598   7
   0 -13   8-24.2321 21.6780  25
   0 -13   7-6.89289 15.6714   7
   0 -13   6 165.061 21.9738   7
   0 -13   6 153.243 19.2592  16
   0 -13   5 220.772 23.0725  16
   0 -13   5 269.017 26.8483   7
   0 -13   4 21.2403 11.8129  16
   0 -13   4 38.6986 14.7334   7
   0  13  -4 3.89638 8.07366  15
   0 -13   4 9.95424 16.2822  25
   0  13  -3 82.2704 11.2324  15
   0 -13   3 76.3297 13.7854  16
   0 -13   3 94.7949 19.1880  25
   0  13  -2 173.225 15.4355  15
   0 -13   2 125.312 17.7441  26
   0 -13   2 154.869 21.4387  25
   0 -13   2 191.073 17.8387  16
   0 -13   1 83.5614 13.9594  26
   0 -13   1 130.818 18.5022  25
   0  13  -1 91.6977 13.0835  12
   0 -13   1 114.543 14.3056  16
   0 -13   1 118.448 14.7387  27
   0 -13   0 387.934 30.6552  25
   0 -13   0 270.022 26.0844  26
   0 -13   0 357.152 27.4086  27
   0  13   0 311.292 26.1543  12
   0 -13   0 263.128 28.3071  24
   0 -13   0 370.450 27.0257  16
   0 -13  -1 304.204 24.1716  27
   0 -13  -1 225.077 22.9892  26
   0  13   1 292.137 23.3168  12
   0 -13  -1 248.566 25.0998  24
   0 -13  -1 312.956 26.9682  25
   0  13   1 212.072 28.1684   2
   0 -13  -1 295.022 23.8891  16
   0 -13  -2 737.464 51.9699  16
   0  13   2 537.844 57.5002   2
   0 -13  -2 767.546 54.4574  25
   0 -13  -2 763.369 52.4034  27
   0 -13  -2 722.963 61.3644   1
   0 -13  -2 608.692 52.7108  24
   0  13   2 781.558 51.8249  12
   0  13   3 173.417 24.9910   2
   0 -13  -3 227.764 19.0422  27
   0 -13  -3 175.747 19.4939  24
   0 -13  -3 207.079 28.0613   1
   0 -13  -3 192.841 21.0150  25
   0  13   3 172.906 17.5186  29
   0  13   3 203.292 18.4401  12
   0 -13  -4 11.5125 10.4720  24
   0 -13  -4 1.08107 8.52172  31
   0  13   4-1.34992 12.8439   2
   0  13   4-6.65340 9.19369  12
   0 -13  -4-2.21070 11.2322  25
   0 -13  -5 293.085 23.7316  31
   0 -13  -5 215.002 23.3078  24
   0 -13  -5 278.384 24.9979  25
   0  13   5 313.162 23.1339  12
   0  13   5 234.322 31.2166   2
   0  13   6 15.7206 15.0394   2
   0  13   6 22.9432 9.51381  13
   0 -13  -6 22.7496 10.1857  24
   0  13   6 32.8078 9.03583  29
   0 -13  -6 24.3855 9.62053  31
   0 -13  -6 15.2728 10.6717  25
   0  13   6 24.0377 9.27906  12
   0 -13  -7 81.4554 13.4183  25
   0  13   7 76.4997 12.2860  13
   0  13   7 67.8874 11.7655  35
   0 -13  -7 88.5031 12.7476  31
   0  13   7 96.5737 11.8124  12
   0  13   7 88.4450 11.9362  29
   0  13   8 33.1402 10.3641  13
   0 -13  -8 30.8256 10.6255  31
   0  13   8 24.2033 9.67735  35
   0  13   8 49.8523 10.3799  29
   0 -13  -8 33.4516 11.0341  25
   0  13   8 33.7880 9.95437  12
   0  13   9 24.5453 10.7532  35
   0  13   9 33.0181 10.5595  12
   0  13   9 51.1727 11.2535  29
   0 -13  -9 47.6978 11.4462  31
   0  13   9 37.9914 11.1393  13
   0  13  10 1407.65 106.504  35
   0  13  10 1654.47 105.865  12
   0  13  10 1511.69 106.492  13
   0  13  10 1625.34 106.249  29
   0 -13 -10 1448.84 106.778  31
   0  13  11 358.934 27.6408  12
   0  13  11 305.837 28.9737  13
   0  13  11 348.590 29.0003  35
   0  13  11 362.215 28.6104  29
   0  13  12 19.0501 11.5636  35
   0  13  12 20.4994 10.3190  12
   0  13  12 30.2708 11.5685  29
   0  13  12 11.2460 11.9255  13
   0  13  13 390.910 34.5410  35
   0  13  13 461.120 34.0873  29
   0  13  13 443.942 32.9408  12
   0  13  13 373.578 34.3508  13
   0  13  14 60.4830 13.4401  29
   0  13  14 18.4320 12.8792  13
   0  13  14 20.8327 11.1291  12
   0  13  14 24.5617 12.8714  35
   0  13  15 608.916 43.5533  12
   0  13  15 587.653 46.1454  13
   0  13  15 630.634 44.9976  29
   0  13  15 503.489 45.1533  35
   0  13  16 38.9754 11.1890  12
   0  13  16 48.9647 15.1271  13
   0  13  16 18.8448 11.2359  15
   0  13  17-7.19402 10.6421  15
   0  13  17 5.85637 10.2875  12
   0  13  17 10.5172 14.4591  13
   0  13  18 533.425 42.6536  13
   0  13  18 453.763 38.9310  15
   0  13  18 598.788 40.7929  29
   0  13  19-5.23615 10.1342  15
   0  13  19-10.3376 13.7478  13
   0  13  20 267.001 25.6152  35
   0  13  20 187.813 20.1917  15
   0  13  20 285.244 22.3011  29
   0  13  20 214.027 24.2552  13
   0  13  21 357.810 28.9214  29
   0  13  21 372.693 32.4880  35
   0  13  22 27.3830 9.43470  29
   0  13  22 6.98428 13.4642  35
   0  13  23 138.592 13.8184  29
   0  13  23 184.697 18.4102  35
   0 -13 -24 9.47213 9.46800  31
   0  13  24-8.83990 10.1743  35
   0  13  24-3.81968 9.50410  13
   0  13  25-2.31543 8.27045  35
   0 -13 -25-1.81380 7.22537  31
   0  13  25-2.17730 7.50700  13
   0 -14  17 15.6948 11.7552   7
   0 -14  17 1.20422 9.02404  27
   0 -14  17 19.5615 10.4352   8
   0 -14  17 9.29176 8.90077  11
   0 -14  16 111.005 14.1425  11
   0 -14  16 115.005 15.2004  27
   0 -14  16 74.0871 14.9191  25
   0 -14  16 79.4200 16.4515   7
   0 -14  16 95.0964 15.5692   8
   0 -14  15-0.47049 12.2351   8
   0 -14  15 2.49334 15.2787  25
   0 -14  15 20.3377 15.0278   7
   0 -14  15 31.0223 13.7959  27
   0 -14  14 1.18070 15.9275   7
   0 -14  14 19.4080 18.6917  25
   0 -14  14 8.73467 15.5973  27
   0 -14  14 5.90181 13.5317   8
   0 -14  13-3.19791 16.4367   7
   0 -14  13 0.59047 13.4125   8
   0 -14  13 41.7297 17.4842  27
   0 -14  13-10.4332 21.0497  25
   0 -14  12 8.39958 22.3593  25
   0 -14  12 5.38056 17.9032   7
   0 -14  11 59.7766 20.9690   7
   0 -14  11 124.831 27.4751  25
   0 -14  10-16.0788 16.5455   7
   0 -14  10 4.19017 24.1008  25
   0 -14   9 92.7188 21.6098   7
   0 -14   9 125.851 28.1341  25
   0 -14   8 10.9503 23.6092  25
   0 -14   8-0.67721 16.9504   7
   0 -14   7 11.7846 16.1738   7
   0 -14   6 22.3169 14.0710  16
   0 -14   6 40.8299 17.5348   7
   0 -14   5 73.6492 15.4063  16
   0 -14   5 77.9038 17.8233   7
   0 -14   5 38.2116 19.9914  25
   0 -14   4 59.9007 17.2762   7
   0 -14   4 58.9601 14.5565  16
   0 -14   4 26.0967 18.9884  25
   0 -14   3 76.4889 14.4072  16
   0 -14   3 66.9411 19.8593  25
   0  14  -3 59.4488 10.8464  15
   0 -14   2 22.1251 16.8604  25
   0 -14   2 23.3823 11.4913  16
   0  14  -1 322.883 28.5022  12
   0 -14   1 362.733 29.6397  16
   0 -14   1 382.277 33.9202  25
   0 -14   1 370.208 29.9832  27
   0 -14   0-17.5104 11.5121  26
   0 -14   0 10.2800 10.5328  27
   0 -14   0 2.34694 13.8934  25
   0  14   0-6.28548 9.66737  12
   0 -14   0 9.48546 10.4604  16
   0 -14  -1 56.3760 13.3365  26
   0  14   1 95.9071 13.3758  12
   0 -14  -1 71.5761 16.5050  24
   0 -14  -1 98.8369 13.9213  16
   0 -14  -1 95.1101 14.1053  27
   0 -14  -1 109.270 18.2836  25
   0 -14  -2 606.449 56.8186  26
   0 -14  -2 696.179 59.0873  24
   0  14   2 873.821 57.7813  12
   0 -14  -2 936.236 58.8517  27
   0 -14  -2 877.201 60.9290  25
   0 -14  -2 924.218 58.4768  16
   0 -14  -3 21.9430 10.6377  27
   0 -14  -3 13.2987 12.5824  25
   0 -14  -3 29.4979 12.2583  24
   0  14   3 0.58139 10.0376  12
   0 -14  -4 53.4958 13.8775  25
   0  14   4 32.7222 10.3782  12
   0 -14  -4 32.5172 10.9901  27
   0 -14  -4 48.6750 12.1723  24
   0  14   5 17.3284 9.66368  12
   0 -14  -5 9.16425 11.7331  25
   0  14   5 17.1043 9.42193  13
   0 -14  -5 13.7557 11.2972  24
   0 -14  -5 7.57587 9.60398  31
   0  14   6 2.27096 8.97112  12
   0 -14  -6 12.2520 10.9685  24
   0  14   6-3.69884 9.18408  13
   0 -14  -6 3.22416 9.69110  31
   0 -14  -6-8.98014 12.0071  25
   0  14   7 252.624 22.5648  13
   0 -14  -7 250.550 24.3563  25
   0 -14  -7 259.982 23.4900  31
   0 -14  -7 215.422 22.7172  24
   0  14   7 305.611 22.5271  12
   0  14   7 240.541 22.3577  29
   0  14   8 72.6765 12.9187  13
   0  14   8 55.2298 11.6773  35
   0  14   8 86.7973 12.3280  12
   0  14   8 72.8555 12.3718  29
   0 -14  -8 73.8087 14.1678  25
   0 -14  -8 65.6184 13.1210  31
   0  14   9 1154.67 86.7745  35
   0 -14  -9 1239.97 87.3853  31
   0  14   9 1303.04 86.8145  29
   0 -14  -9 1145.65 87.5343  25
   0  14   9 1310.07 86.0905  12
   0  14   9 1233.23 86.6277  13
   0  14  10 813.971 59.7843  29
   0  14  10 766.962 59.9717  13
   0  14  10 791.890 60.3179  35
   0 -14 -10 826.230 60.7606  31
   0  14  10 917.838 59.3690  12
   0  14  11 1.21920 10.0047  12
   0  14  11-9.80562 12.0262  35
   0  14  11 15.0296 11.6590  13
   0  14  11 28.7260 11.4619  29
   0 -14 -11 7.87540 11.5513  31
   0  14  12 503.775 35.4184  12
   0  14  12 448.066 36.7787  13
   0  14  12 428.965 36.7818  35
   0  14  12 443.777 35.9378  29
   0 -14 -12 431.521 36.9966  31
   0  14  13 8.75781 12.7729  13
   0  14  13 39.0428 13.9303  29
   0  14  13 41.0561 11.3418  12
   0  14  13 31.8988 13.7199  35
   0  14  14 322.495 26.0169  29
   0  14  14 249.436 23.4441  12
   0  14  14 279.602 26.5781  35
   0  14  14 247.580 25.7894  13
   0  14  15 131.586 15.4656  12
   0  14  15 102.987 18.2078  35
   0  14  15 89.5343 18.0977  13
   0  14  15 151.951 18.5810  29
   0  14  16 35.9991 14.1668  29
   0  14  16 3.75820 10.3677  12
   0  14  16-13.4781 15.1186  35
   0  14  16-7.33840 15.0045  13
   0  14  17 266.596 23.8816  12
   0  14  17 316.570 26.4203  29
   0  14  17 261.897 27.3429  13
   0  14  18 1.96087 14.0316  13
   0  14  18 16.1176 13.2122  29
   0  14  19 153.174 17.3557  29
   0  14  19 118.390 19.0214  13
   0  14  20 152.965 20.1613  13
   0  14  20 146.795 16.8977  29
   0  14  21 16.3113 12.6418  13
   0  14  21 31.1642 10.6555  29
   0 -14 -21 19.9504 13.7165  31
   0  14  22 158.385 19.0411  35
   0  14  22 142.257 18.2598  13
   0 -14 -22 166.118 18.4092  31
   0  14  22 161.779 15.4611  29
   0 -14 -23 3.17843 10.4278  31
   0  14  23-3.29659 7.09305  29
   0  14  23 18.1005 11.3518  35
   0 -14 -24 30.0037 9.12825  31
   0  14  24 19.6559 9.72570  35
   0 -15  16 54.8283 13.2342   7
   0 -15  16 66.7821 12.8232   8
   0 -15  16 74.9391 11.5996  27
   0 -15  16 48.9237 10.8267  25
   0 -15  16 68.7816 11.1013  11
   0 -15  15 10.7414 12.5241   8
   0 -15  15 37.1411 13.6604   7
   0 -15  15 23.7177 12.3273  27
   0 -15  15 53.3993 14.1815  25
   0 -15  14-5.25885 16.0035  25
   0 -15  14 7.05031 13.2871   8
   0 -15  14 7.29504 13.9692  27
   0 -15  14 8.14723 14.9868   7
   0 -15  13 19.0585 16.2084  27
   0 -15  13 20.5117 15.5135   7
   0 -15  13 36.3911 19.5548  25
   0 -15  13 2.67148 14.2052   8
   0 -15  12 0.61716 15.2899   7
   0 -15  12-20.6426 22.0008  25
   0 -15  11 78.4668 25.1479  25
   0 -15  11 69.6447 19.7239   7
   0 -15  10 0.67397 16.7702   7
   0 -15  10 6.58066 24.2664  25
   0 -15   9-10.2151 16.1464   7
   0 -15   9 22.0714 23.3461  25
   0 -15   8 0.67947 17.2612   7
   0 -15   7 58.7352 18.6959   7
   0 -15   6 17.5413 17.0590   7
   0 -15   5-23.8539 17.2823   7
   0 -15   5 13.0672 13.9074  16
   0 -15   5-5.66766 21.7687  25
   0 -15   4-0.60351 15.5447   7
   0 -15   4 17.2055 13.8373  16
   0 -15   4-3.12236 21.8622  25
   0 -15   3 610.101 46.2709   7
   0 -15   3 609.030 49.6111  25
   0 -15   3 590.709 43.8026  16
   0  15  -3 495.659 40.6496  15
   0 -15   2 25.0122 12.9181  16
   0 -15   2-5.67525 19.3146  25
   0 -15   2 5.04412 13.0260  27
   0 -15   1 212.523 28.1723  25
   0 -15   1 255.698 24.4174  27
   0 -15   1 259.941 23.8346  16
   0 -15   0 7.60345 11.4552  16
   0 -15   0 7.10012 15.5613  25
   0  15   0-6.56736 10.5352  12
   0 -15   0 10.8673 11.8522  27
   0 -15  -1 23.4280 11.4302  16
   0 -15  -1 12.8490 15.1263  25
   0 -15  -1 12.3319 11.5044  27
   0  15   1 8.41798 10.1656  12
   0 -15  -2 387.512 28.9392  16
   0 -15  -2 323.722 31.4035  25
   0 -15  -2 376.370 29.1382  27
   0  15   2 320.046 27.6582  12
   0 -15  -3 54.0744 12.3941  16
   0 -15  -3 50.5699 14.2782  24
   0 -15  -3 57.6632 12.7228  27
   0 -15  -3 53.6846 16.1307  25
   0  15   3 25.1337 11.0653  12
   0 -15  -4 72.7464 15.8436  24
   0 -15  -4 104.633 14.7317  27
   0  15   4 88.0552 13.5546  12
   0 -15  -4 82.0339 16.6890  25
   0 -15  -5 214.307 23.4451  25
   0  15   5 237.146 20.7538  12
   0 -15  -5 217.664 21.1991  27
   0 -15  -5 168.504 21.7160  24
   0  15   5 222.688 19.8253  13
   0  15   6-7.44410 10.0705  13
   0 -15  -6-6.55582 11.3763  31
   0 -15  -6 1.35953 11.8719  24
   0  15   6 2.18616 9.84849  12
   0 -15  -6 8.31229 12.6025  25
   0  15   7 59.0660 11.9292  13
   0 -15  -7 55.5648 14.0755  24
   0  15   7 74.9465 12.0148  12
   0 -15  -7 65.7994 14.4749  25
   0  15   7 36.3687 12.2643  29
   0 -15  -7 68.5677 13.2586  31
   0 -15  -8 119.762 16.7240  31
   0  15   8 136.266 16.0041  13
   0  15   8 122.479 15.6991  29
   0 -15  -8 119.251 17.8009  25
   0  15   8 125.703 15.3799  12
   0  15   9 5.80655 11.4902  29
   0  15   9 5.68240 9.90132  12
   0 -15  -9-4.14167 12.0082  31
   0 -15  -9 8.98695 12.6303  25
   0  15   9 8.16648 10.6100  13
   0  15  10 1.72871 11.4272  35
   0  15  10 8.16244 11.1070  13
   0  15  10 12.2961 12.1603  29
   0  15  10 29.3263 10.5931  12
   0 -15 -10-1.41631 11.9733  31
   0  15  11 129.121 17.4236  29
   0  15  11 129.608 16.6808  13
   0  15  11 101.626 17.0516  35
   0 -15 -11 145.691 18.0280  31
   0  15  11 156.109 16.5185  12
   0  15  12 786.150 64.1848  13
   0 -15 -12 832.448 65.5432  31
   0  15  12 834.942 65.2155  35
   0  15  12 1000.75 65.2584  29
   0  15  12 992.003 64.0255  12
   0 -15 -13 170.768 22.6297  31
   0  15  13 213.247 22.8236  35
   0  15  13 216.875 21.8571  29
   0  15  13 181.524 21.5414  13
   0  15  13 242.248 20.6199  12
   0  15  14 72.2491 15.4307  13
   0 -15 -14 34.0348 15.5874  31
   0  15  14 63.4979 16.1263  29
   0  15  14 65.9026 12.5988  12
   0  15  14 24.4405 14.9832  35
   0  15  15 253.027 21.1616  12
   0  15  15 257.148 23.8366  29
   0  15  15 222.075 24.6062  35
   0 -15 -15 165.564 24.0673  31
   0  15  15 202.439 23.6093  13
   0  15  16 28.3466 14.5805  13
   0  15  16 44.1052 15.6905  35
   0  15  16 56.0407 14.5586  29
   0 -15 -16 19.7014 15.7506  31
   0  15  16 38.7850 11.8915  12
   0  15  17 132.110 18.5263  29
   0 -15 -17 110.022 19.9717  31
   0  15  17 139.408 15.4411  12
   0  15  17 146.088 19.6053  13
   0  15  17 126.210 19.9869  35
   0 -15 -18-3.06768 15.4729  31
   0  15  18 0.47152 14.2018  13
   0  15  18 13.4868 12.6395  29
   0  15  19 4.39257 11.9853  29
   0 -15 -19-21.3647 14.1466  31
   0  15  19 0.45195 13.6572  13
   0  15  20 322.365 26.7530  29
   0 -15 -20 311.706 28.9596  31
   0  15  20 320.163 28.6718  13
   0  15  21-2.11146 9.40752  29
   0  15  21-5.29600 12.3676  13
   0 -15 -21 2.81499 12.3893  31
   0  15  22 123.473 15.2809  13
   0  15  22 89.8754 12.2728  29
   0 -15 -22 131.403 15.4498  31
   0  15  23-14.5041 10.0899  13
   0  15  23-13.5161 6.84198  29
   0 -15 -23-2.83474 9.80825  31
   0 -15 -24 8.73037 7.68927  31
   0 -16  15 18.0640 10.7841   8
   0 -16  15 6.82472 9.24140  11
   0 -16  15 9.97858 11.2083   7
   0 -16  15 10.7264 9.69787  27
   0 -16  15 14.0902 10.4334  25
   0 -16  14 7.92618 11.7158  27
   0 -16  14 28.0951 13.0092   7
   0 -16  14 8.25621 11.9460   8
   0 -16  14 9.44747 13.9698  25
   0 -16  13 11.3522 16.4622  25
   0 -16  13-0.46325 13.0823   8
   0 -16  13 6.75424 13.7976   7
   0 -16  13 0.35991 13.2863  27
   0 -16  12 11.0451 14.4392   8
   0 -16  12 33.7392 20.8902  25
   0 -16  12 27.0370 14.8122   7
   0 -16  11 25.2519 16.1008   7
   0 -16  11 5.73519 20.7884  25
   0 -16  10-3.75177 16.6083   7
   0 -16  10-6.23936 23.9178  25
   0 -16   9 18.7530 16.3424   7
   0 -16   9 28.0144 23.3941  25
   0 -16   8-2.62928 16.4713   7
   0 -16   7 11.2147 16.5848   7
   0 -16   6-8.49020 15.5549   7
   0 -16   5 16.0219 22.5325  25
   0 -16   5 12.6149 14.6689  16
   0 -16   5-20.4982 15.9384   7
   0 -16   4 33.8285 14.6788  16
   0 -16   4 39.4933 21.7602  25
   0 -16   4 29.9263 16.9094   7
   0 -16   3 7.85054 15.3518   7
   0 -16   3-5.53845 20.5483  25
   0 -16   3 29.8134 14.8149  16
   0 -16   2 63.5660 17.3145   7
   0 -16   2 45.7049 21.5638  25
   0 -16   2 67.9714 15.9285  27
   0 -16   2 46.7958 15.4335  16
   0 -16   1 148.375 24.7566  25
   0 -16   1 151.528 19.2663  16
   0 -16   1 153.494 20.4271  27
   0 -16   0 13.6662 13.8550  27
   0 -16   0-0.70036 17.3437  25
   0 -16   0-8.21787 12.7486  16
   0 -16  -1 101.949 21.5565  25
   0 -16  -1 142.268 17.3429  16
   0 -16  -1 157.873 18.5655  27
   0  16   1 92.7517 15.1428  12
   0 -16  -2 0.63918 15.9740  25
   0 -16  -2-10.9145 13.3646  27
   0 -16  -2-10.8015 12.2634  16
   0  16   2-13.3026 11.0792  12
   0  16   3 190.359 18.8757  12
   0 -16  -3 156.244 22.1812  24
   0 -16  -3 174.504 20.9279  27
   0 -16  -3 202.872 24.2980  25
   0 -16  -3 189.332 20.1570  16
   0 -16  -4 211.272 25.4966  25
   0 -16  -4 239.235 22.4288  16
   0 -16  -4 177.339 23.5290  24
   0 -16  -4 258.117 23.5906  27
   0  16   4 226.590 21.6191  12
   0  16   5-8.24933 11.1365  12
   0 -16  -5-4.60296 13.4325  24
   0 -16  -5-6.95414 14.3395  25
   0  16   5-4.82938 10.1604  13
   0 -16  -5-5.81354 13.0089  27
   0 -16  -6 418.848 40.6766  24
   0  16   6 528.586 39.3911  13
   0 -16  -6 524.191 41.1633  27
   0  16   6 573.536 40.0319  12
   0 -16  -6 535.420 43.0692  25
   0  16   7 73.5956 13.0024  12
   0  16   7 68.0753 12.8162  13
   0 -16  -7 56.2091 14.1916  31
   0  16   7 41.6781 13.2489  29
   0 -16  -7 69.4641 15.6494  25
   0 -16  -7 44.6815 14.2751  24
   0 -16  -8 17.0980 12.6138  24
   0 -16  -8 21.5208 13.4415  31
   0  16   8 3.84798 13.0542  29
   0 -16  -8 27.2294 14.3737  25
   0  16   8 28.4102 10.9893  12
   0  16   8 10.6061 10.9762  13
   0  16   9 53.9059 14.8778  29
   0  16   9 104.781 13.9364  12
   0  16   9 85.8026 14.0683  13
   0 -16  -9 79.6768 15.5356  31
   0 -16  -9 81.7270 16.5192  25
   0 -16 -10 7.38674 13.0872  25
   0  16  10-0.79185 12.9142  29
   0  16  10 10.8175 10.7445  12
   0 -16 -10 7.42342 13.0252  31
   0  16  10 3.18072 11.4564  13
   0  16  11 333.868 26.3868  12
   0  16  11 267.868 26.9444  13
   0 -16 -11 302.313 28.6308  31
   0  16  11 310.375 28.2851  29
   0  16  12 158.749 20.4698  29
   0  16  12 157.104 20.2824  35
   0  16  12 155.287 19.5072  13
   0 -16 -12 176.079 21.3236  31
   0  16  12 181.553 18.0877  12
   0 -16 -13 85.5130 17.5949  31
   0  16  13 106.477 13.9264  12
   0  16  13 72.8587 16.6618  29
   0  16  13 78.8976 15.8449  13
   0  16  13 50.3860 16.9827  35
   0  16  14 1546.99 118.453  35
   0  16  14 1555.26 117.917  13
   0 -16 -14 1659.12 119.295  31
   0  16  14 1817.60 116.854  12
   0  16  14 1850.02 118.501  29
   0  16  15 12.1419 14.8940  29
   0  16  15 12.0497 13.2871  13
   0  16  15 28.2696 10.8664  12
   0 -16 -15 13.1834 14.6947  31
   0  16  15 21.3193 15.0292  35
   0  16  16 226.099 24.8864  13
   0  16  16 227.851 25.8101  35
   0  16  16 240.707 24.8232  29
   0 -16 -16 238.527 26.0381  31
   0  16  16 287.228 22.5383  12
   0  16  17 31.7585 15.9555  35
   0  16  17 44.1309 14.8796  13
   0  16  17 26.1189 13.9556  29
   0 -16 -17 39.7082 15.9857  31
   0  16  18 0.35549 12.5677  29
   0  16  18 4.00867 13.7744  13
   0 -16 -18-10.2384 14.4546  31
   0  16  18 2.78599 14.7170  35
   0  16  19 334.110 29.8040  13
   0  16  19 323.128 30.3916  35
   0  16  19 359.183 28.9694  29
   0 -16 -19 348.717 30.8742  31
   0  16  20-17.6270 10.9848  29
   0  16  20-7.72000 12.3587  13
   0 -16 -20-1.24539 12.6980  31
   0 -16 -21 173.031 17.6523  31
   0  16  21 154.320 17.1664  13
   0  16  21 124.657 15.1073  29
   0  16  22 111.618 13.9842  13
   0 -16 -22 130.252 14.4187  31
   0 -16 -23-3.42463 8.35032  31
   0  16  23-6.11307 9.13200  13
   0 -17  14-1.18739 9.14312  27
   0 -17  14 1.53791 10.2874   8
   0 -17  14-8.14190 10.0131   7
   0 -17  14 0.31715 10.4468  25
   0 -17  13-2.96660 11.5063  27
   0 -17  13-1.75139 14.1386  25
   0 -17  13-10.2565 12.3525   7
   0 -17  13 3.05320 11.2697   8
   0 -17  12-15.1943 13.1335   7
   0 -17  12-8.99484 12.5406   8
   0 -17  12-14.3582 13.8452  27
   0 -17  12 5.42303 16.9116  25
   0 -17  11 3.16578 19.4028  25
   0 -17  11 5.53533 14.2895   7
   0 -17  10 15.4790 14.2145   7
   0 -17  10 8.51761 22.5474  25
   0 -17   9 12.3248 22.6309  25
   0 -17   9 16.4652 16.3734   7
   0 -17   8-5.50799 14.6461   7
   0 -17   7 6.90745 15.7959   7
   0 -17   6 18.0002 25.3053  25
   0 -17   6 13.9327 15.8262   7
   0 -17   5 13.6519 24.2911  25
   0 -17   5 1.26406 15.1816   7
   0 -17   4 77.6611 25.1667  25
   0 -17   4 70.5443 18.0373   7
   0 -17   4 93.1769 18.1313  16
   0 -17   3-18.8972 22.6425  25
   0 -17   3 14.0880 15.8960   7
   0 -17   3 10.6197 14.7379  16
   0 -17   2 14.3507 15.3966   7
   0 -17   2 20.1511 15.6354  27
   0 -17   2 21.8741 14.7493  16
   0 -17   2 20.7788 20.9075  25
   0 -17   1 173.236 27.8794  25
   0 -17   1 196.935 23.3113  27
   0 -17   1 167.766 21.6924  16
   0 -17   0 59.6749 21.2343  25
   0 -17   0 77.5420 15.7637  16
   0 -17   0 58.6519 16.1873  27
   0 -17  -1 40.5940 14.0523  16
   0 -17  -1 52.4414 20.2321  25
   0  17   1 7.05686 11.9775  12
   0 -17  -1 29.0921 14.9907  27
   0 -17  -2 52.5490 15.5037  27
   0 -17  -2 31.9566 13.9178  16
   0 -17  -2 29.0548 18.5437  25
   0  17   2 11.9682 11.8335  12
   0 -17  -3 6.13215 12.9968  16
   0 -17  -3 0.96217 13.4083  27
   0 -17  -3-4.67879 17.7134  25
   0  17   3-1.52360 10.8918  12
   0 -17  -4 53.3460 14.4435  16
   0 -17  -4 43.4967 15.0221  27
   0 -17  -4 37.5167 18.3060  25
   0  17   4 47.3531 12.7238  12
   0 -17  -5 138.676 18.7070  27
   0  17   5 95.3882 16.1724  12
   0 -17  -5 102.267 20.2689  25
   0 -17  -5 136.663 17.2623  16
   0  17   6 49.0448 11.8527  13
   0 -17  -6 50.3336 13.9303  16
   0 -17  -6 27.4544 15.1486  24
   0 -17  -6 53.0510 17.1536  25
   0  17   6 48.1220 12.5648  12
   0 -17  -6 63.9156 15.7949  27
   0 -17  -7-7.12711 15.0565  25
   0 -17  -7 2.62560 13.4333  24
   0  17   7 8.00559 11.1447  12
   0  17   7 7.13452 10.8486  13
   0 -17  -7 6.70640 14.4504  27
   0 -17  -8 170.597 20.2165  31
   0 -17  -8 122.676 18.9128  24
   0  17   8 136.825 18.9771  29
   0  17   8 159.464 18.3057  12
   0 -17  -8 191.184 22.0500  25
   0  17   8 152.796 17.5350  13
   0  17   9 5.02944 11.2635  13
   0 -17  -9 5.11373 14.4546  25
   0  17   9-4.29297 10.7168  12
   0  17   9-30.9896 15.3764  29
   0 -17  -9-1.01162 13.8203  31
   0  17  10 1.66682 15.0603  29
   0  17  10 31.5281 11.6459  12
   0 -17 -10 28.6033 14.0567  31
   0  17  10 33.6863 12.3996  13
   0 -17 -10 48.9225 14.8428  25
   0  17  11 103.526 14.4749  12
   0 -17 -11 72.7590 16.9466  31
   0  17  11 68.6419 17.2128  29
   0  17  11 104.106 15.4105  13
   0  17  12 223.799 24.9440  29
   0  17  12 248.612 23.8194  13
   0  17  12 263.218 23.0094  12
   0 -17 -12 230.198 25.8474  31
   0  17  13 0.83448 15.3844  29
   0  17  13 32.7237 13.7946  13
   0 -17 -13 18.7908 15.2799  31
   0  17  13 19.2302 11.5402  12
   0  17  14 345.924 27.2198  12
   0  17  14 294.685 29.2818  29
   0  17  14 328.421 29.0378  13
   0 -17 -14 288.843 29.8846  31
   0 -17 -15 212.683 23.5423  31
   0  17  15 182.664 21.7633  13
   0  17  15 222.204 19.9232  12
   0  17  15 186.772 22.9812  29
   0  17  15 207.179 23.3939  35
   0 -17 -16 65.3553 17.2808  31
   0  17  16 81.7734 15.8633  13
   0  17  16 84.8801 12.1886  12
   0  17  16 69.5813 16.9413  35
   0  17  16 48.5656 16.3365  29
   0  17  17 96.5074 16.4470  13
   0  17  17 88.9343 16.4200  29
   0 -17 -17 98.6166 17.4922  31
   0  17  17 95.1822 16.8005  35
   0  17  18 45.1424 15.0416  35
   0  17  18 55.8429 13.8643  29
   0  17  18 37.3350 13.4844  13
   0 -17 -18 29.1851 14.8651  31
   0  17  19 71.5767 14.5106  13
   0  17  19 69.1762 15.1121  35
   0  17  19 81.1036 13.9541  29
   0 -17 -19 83.5649 15.3484  31
   0 -17 -20 42.0490 12.9841  31
   0  17  20 20.7579 10.6164  29
   0  17  20 31.4756 12.2750  13
   0  17  21-0.30333 10.5151  13
   0 -17 -21 12.3248 11.3038  31
   0  17  22 43.1084 8.75341  29
   0 -17 -22 72.4002 11.4489  31
   0  17  22 84.7049 11.4630  13
   0 -17 -23 24.5041 7.62010  31
   0  17  23 19.4918 8.11292  13
   0 -18  13-1.05330 9.36561   7
   0 -18  13-9.93050 8.71781  27
   0 -18  13-11.5283 10.5257  25
   0 -18  13 1.74458 10.1654   8
   0 -18  12-2.90506 11.3159   8
   0 -18  12-8.17923 11.7208   7
   0 -18  12 15.5917 14.7564  25
   0 -18  12-3.96475 10.7840  27
   0 -18  11 2.65613 16.7023  25
   0 -18  11-2.84164 12.0432   7
   0 -18  11-22.7426 12.9065   8
   0 -18  11-10.0596 12.2804  27
   0 -18  10 62.2968 20.9270  25
   0 -18  10 31.7826 14.0587   7
   0 -18   9-28.2572 22.9940  25
   0 -18   9 1.51839 13.6979   7
   0 -18   8 3.81288 13.5712   7
   0 -18   7 51.3796 17.1134   7
   0 -18   6 5.75832 24.6999  25
   0 -18   6 11.7912 14.9756   7
   0 -18   5 96.9910 18.7764   7
   0 -18   5 91.7677 27.1703  25
   0 -18   4 10.2343 15.0760   7
   0 -18   4 1.67681 24.6132  25
   0 -18   3 0.96959 15.4433  16
   0 -18   3-2.49908 22.1220  25
   0 -18   3 0.59903 14.4949   7
   0 -18   2-5.79319 16.6266  27
   0 -18   2 14.6633 23.2335  25
   0 -18   2 26.6572 16.1661   7
   0 -18   2 24.6455 15.5712  16
   0 -18   1 2.33049 15.2987   7
   0 -18   1 11.5071 14.6317  16
   0 -18   1 27.8712 22.0823  25
   0 -18   1 14.1546 16.4033  27
   0 -18   0 77.4455 18.5373  27
   0 -18   0 85.8425 17.1355  16
   0 -18   0 66.6035 23.4729  25
   0 -18  -1 36.0343 22.1600  25
   0 -18  -1 53.9044 15.7710  16
   0 -18  -1 55.6234 17.2608  27
   0 -18  -2 12.7297 15.0714  27
   0 -18  -2 13.8981 14.1510  16
   0  18   2-22.6362 12.9231  12
   0 -18  -2 12.3493 20.2653  25
   0 -18  -3 250.090 25.0848  16
   0 -18  -3 225.251 29.0874  25
   0  18   3 213.714 23.2610  12
   0 -18  -3 307.285 27.0564  27
   0 -18  -4 6.00583 15.3119  27
   0 -18  -4-12.2504 14.4436  16
   0 -18  -4 6.13900 17.7549  25
   0  18   4-1.97888 11.5578  12
   0 -18  -5 65.4844 19.3581  25
   0  18   5 66.4494 13.5454  12
   0 -18  -5 74.7903 15.8824  16
   0 -18  -5 63.2788 16.6923  27
   0 -18  -6 45.7092 14.3250  16
   0 -18  -6 26.4977 17.3081  25
   0  18   6 31.4101 10.5072  13
   0  18   6 8.48754 11.7992  12
   0 -18  -6 26.8435 15.5690  27
   0  18   7-10.2851 11.8486  12
   0  18   7 13.8312 10.4943  13
   0 -18  -7 15.4057 15.8236  27
   0 -18  -7 8.49186 13.4196  16
   0 -18  -7 7.52321 16.0563  25
   0 -18  -8 306.366 30.8206  25
   0  18   8 328.616 27.5829  12
   0  18   8 308.104 26.9316  13
   0 -18  -8 303.587 29.6355  27
   0  18   9-25.5477 15.0208  29
   0  18   9 21.7553 11.5335  13
   0 -18  -9 16.4656 15.5737  27
   0 -18  -9 1.18417 15.1628  25
   0  18   9 7.05165 11.0163  12
   0 -18 -10 118.670 18.7233  31
   0  18  10 86.9934 15.3256  13
   0  18  10 130.406 16.0175  12
   0 -18 -10 126.300 19.0584  25
   0  18  10 83.6989 17.8751  29
   0  18  11 287.969 25.7892  13
   0  18  11 253.710 27.3652  29
   0  18  11 286.441 25.3859  12
   0 -18 -11 309.873 28.1670  31
   0  18  12-1.38604 11.4386  12
   0  18  12-37.7556 16.9669  29
   0 -18 -12-14.4771 15.2447  31
   0  18  12-14.8219 12.6132  13
   0  18  13 195.205 21.4539  13
   0  18  13 229.615 20.5194  12
   0  18  13 178.170 23.1016  29
   0 -18 -13 232.280 24.2236  31
   0  18  14 58.2438 16.2295  29
   0  18  14 48.1801 13.8369  13
   0 -18 -14 68.2509 16.8839  31
   0  18  14 83.0583 12.8332  12
   0 -18 -15 261.736 24.6320  31
   0  18  15 196.120 23.5265  29
   0  18  15 196.043 22.4534  13
   0  18  15 231.493 20.4872  12
   0 -18 -16 433.728 35.7763  31
   0  18  16 422.060 32.1178  12
   0  18  16 404.269 34.9034  29
   0  18  16 417.156 34.4262  13
   0  18  17-1.95455 12.5124  13
   0  18  17-27.0684 14.1142  29
   0 -18 -17-24.2676 14.7152  31
   0 -18 -18 311.787 26.8931  31
   0  18  18 275.968 25.7820  13
   0  18  18 285.806 25.4641  29
   0 -18 -19-10.9436 11.7170  31
   0  18  19-9.82881 10.9188  13
   0 -18 -20 45.7040 11.9774  31
   0  18  20 10.7044 9.83510  29
   0  18  20 35.4184 11.0348  13
   0  18  21 104.587 12.7333  13
   0  18  21 71.5389 9.72947  19
   0 -18 -21 124.988 13.3835  31
   0  18  22 1.68955 8.00611  13
   0 -18 -22 1.97155 7.54384  31
   0 -19  12 6.31402 8.30084   7
   0 -19  12-0.41653 7.97546  27
   0 -19  12-6.81852 10.4134  25
   0 -19  12 10.6862 10.9483   8
   0 -19  11 3.70528 10.1588  27
   0 -19  11 3.73733 13.6500  25
   0 -19  11-10.4454 10.6576   7
   0 -19  11 1.34649 10.5367   8
   0 -19  10-2.83669 10.9912   7
   0 -19  10 7.10000 16.9385  25
   0 -19  10 3.60188 11.5156   8
   0 -19   9 5.87130 18.2560  25
   0 -19   9 3.26532 12.7215   7
   0 -19   8 6.79485 13.3257   7
   0 -19   7 1.47455 13.1340   7
   0 -19   6 18.9355 24.8997  25
   0 -19   6 20.7692 14.8023   7
   0 -19   5 25.8724 24.9190  25
   0 -19   5 17.2698 15.0971   7
   0 -19   4 34.8697 15.3769   7
   0 -19   4 38.4936 26.1282  25
   0 -19   3 22.0546 15.9317  16
   0 -19   3 9.52728 14.0594   7
   0 -19   3-12.1367 23.8584  25
   0 -19   2 3.11014 16.9437  27
   0 -19   2 4.49878 14.0686   7
   0 -19   2 11.2310 23.2509  25
   0 -19   2 15.6388 15.2037  16
   0 -19   1 0.52188 16.3061  27
   0 -19   1 11.2023 14.4295   7
   0 -19   1 6.34660 21.7389  25
   0 -19   1 9.51259 14.6835  16
   0 -19   0 16.6380 15.1711   7
   0 -19   0-3.65443 16.8747  27
   0 -19   0-7.79132 21.6997  25
   0 -19   0 14.2464 15.4897  16
   0 -19  -1 20.5506 20.1021  25
   0 -19  -1 10.4215 16.7955  27
   0 -19  -1 8.03330 14.8995  16
   0 -19  -2 94.8529 23.1269  25
   0 -19  -2 98.1060 18.1840  16
   0 -19  -2 92.7048 19.5558  27
   0 -19  -3 30.3755 16.6901  27
   0 -19  -3 8.38709 14.4929  16
   0 -19  -3 19.4669 20.4118  25
   0 -19  -4 5.08332 14.1968  16
   0 -19  -4 13.3007 16.3232  27
   0 -19  -4 16.9317 19.0841  25
   0  19   4-2.83530 11.7208  12
   0 -19  -5 49.3392 16.9564  27
   0 -19  -5 17.7865 18.6482  25
   0  19   5 10.0267 11.9244  12
   0 -19  -5 33.0194 14.7318  16
   0  19   6-0.79177 11.6061  12
   0 -19  -6 20.9530 14.8634  16
   0 -19  -6 14.1664 15.7180  27
   0 -19  -6 11.2629 17.6775  25
   0 -19  -7 100.097 17.5511  16
   0 -19  -7 127.507 19.8615  27
   0 -19  -7 101.301 20.7372  25
   0  19   7 113.107 14.7968  13
   0  19   7 105.158 15.7727  12
   0 -19  -8-9.03762 15.8592  27
   0 -19  -8-0.62218 15.5026  25
   0  19   8 2.82976 10.0930  13
   0  19   8-8.40336 11.6630  12
   0 -19  -8-13.9568 13.7669  16
   0  19   9 13.1672 10.5886  13
   0  19   9-8.96373 11.6818  12
   0 -19  -9-4.00131 16.1380  27
   0 -19  -9 2.40602 15.7405  25
   0 -19  -9-4.92110 13.6115  16
   0  19  10-0.36473 11.7515  12
   0  19  10 2.25131 11.1797  13
   0 -19 -10 4.01269 14.7753  25
   0 -19 -10-8.95088 16.4995  27
   0  19  11 14.5533 11.8087  13
   0 -19 -11 22.1977 16.1913  27
   0  19  11 13.0393 11.1183  12
   0  19  11 0.42409 15.0241  29
   0  19  12 9.48661 10.8989  12
   0  19  12-0.83726 15.8122  29
   0  19  12 27.4600 12.1025  13
   0  19  13-9.97794 11.1521  12
   0 -19 -13-16.7544 14.9549  31
   0  19  13 2.72333 11.3981  13
   0  19  13-33.1759 16.2689  29
   0  19  14 8.87536 11.7084  13
   0  19  14-8.39346 10.2058  12
   0 -19 -14 26.3696 14.9210  31
   0  19  15 88.8826 15.3182  13
   0 -19 -15 103.304 17.5586  31
   0  19  15 108.747 13.1362  12
   0  19  15 69.3795 17.2034  29
   0 -19 -16 3.93498 14.0478  31
   0  19  16-2.56562 11.7428  13
   0  19  16-3.89288 13.6175  29
   0 -19 -17 248.458 23.2767  31
   0  19  17 224.744 22.0758  13
   0  19  17 234.890 22.9594  29
   0 -19 -18 22.2823 11.5680  31
   0  19  18 21.2768 11.2967  13
   0  19  18-0.29276 11.9090  29
   0 -19 -19-2.63607 10.6743  31
   0  19  19-26.4988 10.2495  29
   0  19  19-13.6538 10.2503  13
   0  19  20 97.2155 13.1226  13
   0 -19 -20 118.873 14.2522  31
   0  19  21 16.5617 8.19159  13
   0 -20  10 16.6866 10.8503   8
   0 -20  10 25.0885 13.5791  25
   0 -20  10 14.8486 8.92100   7
   0 -20  10 4.32004 9.25544  27
   0 -20   9 0.47192 14.6833  25
   0 -20   9-1.16583 10.2920   7
   0 -20   8 11.0430 11.7876   7
   0 -20   7 3.89638 12.0708   7
   0 -20   6 25.2567 13.5799   7
   0 -20   6 4.65020 21.3980  25
   0 -20   5 54.4672 24.5303  25
   0 -20   5 35.1751 14.3742   7
   0 -20   4 17.6352 24.4138  25
   0 -20   4 12.4843 13.6744   7
   0 -20   3 77.6997 25.5090  25
   0 -20   3 43.1479 14.9426   7
   0 -20   2 6.38632 17.4997  27
   0 -20   2-2.02709 14.2310   7
   0 -20   2 12.4955 14.9256  16
   0 -20   2-13.7521 23.5736  25
   0 -20   1 6.14153 14.1263   7
   0 -20   1 23.4902 17.4078  27
   0 -20   1 2.29636 22.2137  25
   0 -20   1 15.8737 14.6259  16
   0 -20   0 42.1113 15.8703  16
   0 -20   0 37.9499 17.6196  27
   0 -20   0 50.7998 15.7191   7
   0 -20   0 69.1768 24.0888  25
   0 -20  -1-3.06628 14.0203   7
   0 -20  -1 22.4899 20.7403  25
   0 -20  -1 5.05451 14.6122  16
   0 -20  -1 13.2242 17.3124  27
   0 -20  -2 96.9162 17.8989  16
   0 -20  -2 84.0512 17.0428   7
   0 -20  -2 91.8959 23.4437  25
   0 -20  -2 93.8021 19.6989  27
   0 -20  -3-7.32608 14.7669  16
   0 -20  -3-1.52760 16.4443  27
   0 -20  -3-5.03207 19.3288  25
   0 -20  -4 10.6340 16.7709  27
   0 -20  -4-7.00312 18.6192  25
   0 -20  -4 7.74683 15.3122  16
   0 -20  -5 163.004 19.8441  16
   0 -20  -5 124.419 23.8347  25
   0  20   5 106.393 17.2920  12
   0  20   6-10.1516 12.2400  12
   0 -20  -6-0.50049 16.4741  27
   0 -20  -6 8.61472 17.9055  25
   0 -20  -6 21.1169 14.8885  16
   0 -20  -7 362.675 30.7873  27
   0  20   7 274.859 26.8233  12
   0 -20  -7 248.997 30.6816  25
   0 -20  -7 339.021 28.8893  16
   0  20   8 80.7508 12.7140  13
   0 -20  -8 65.2086 16.1505  16
   0  20   8 63.5056 13.7138  12
   0 -20  -8 71.5353 18.3667  25
   0 -20  -8 94.5931 19.0704  27
   0 -20  -9-1.46311 16.2444  27
   0 -20  -9 12.1944 13.6425  16
   0  20   9 3.71289 10.1943  13
   0  20   9 17.8761 11.6672  12
   0 -20  -9 5.28227 15.1041  25
   0  20  10 190.685 19.8480  12
   0 -20 -10 216.260 22.4603  16
   0 -20 -10 243.153 24.5553  27
   0  20  10 189.723 19.5914  13
   0 -20 -10 168.796 22.7101  25
   0 -20 -11-13.4755 13.8245  16
   0  20  11-17.4390 11.1418  13
   0 -20 -11-19.8787 16.6823  27
   0  20  11-23.2697 11.7298  12
   0  20  12 102.108 14.6849  13
   0  20  12 86.6664 14.1925  12
   0  20  13 92.5461 13.3767  12
   0 -20 -13 100.247 18.9293  27
   0  20  13 103.876 14.8750  13
   0  20  14-3.08779 10.7844  13
   0 -20 -14-18.1685 16.0001  27
   0  20  14-19.0301 9.73093  12
   0  20  15 197.015 20.5061  13
   0 -20 -15 249.863 24.1274  27
   0  20  16-5.39660 10.6155  13
   0  20  17 96.6689 13.5532  13
   0 -20 -18 6.05066 12.3147  27
   0  20  18 10.0103 9.64808  13
   0 -20 -19 8.34716 10.8018  27
   0  20  19-16.7049 9.16438  13
   0  20  20 118.694 12.8904  13
   0 -20 -20 142.493 14.3502  27
   0 -21   7-0.54195 9.86124   7
   0 -21   6 43.0812 18.0647  25
   0 -21   6 32.8938 11.5515   7
   0 -21   5 20.4820 11.8033   7
   0 -21   5 7.23493 20.0767  25
   0 -21   4 14.8011 20.5634  25
   0 -21   4 3.82718 11.9873   7
   0 -21   3 0.67031 21.6791  25
   0 -21   3 18.7279 12.4818   7
   0 -21   2 15.7130 12.8535   7
   0 -21   2-24.1737 21.9251  25
   0 -21   1 10.5332 22.8672  25
   0 -21   1 16.9484 14.7709  16
   0 -21   1 31.5043 13.3071   7
   0 -21   1 24.2882 16.8752  27
   0 -21   0 3.11817 12.5544   7
   0 -21   0-7.18190 13.9522  16
   0 -21   0 0.70602 21.4809  25
   0 -21   0 6.10326 16.7233  27
   0 -21  -1 2.81258 21.2454  25
   0 -21  -1 30.0936 13.8096   7
   0 -21  -1 24.8478 14.4804  16
   0 -21  -1 38.1820 17.3036  27
   0 -21  -2-1.34791 12.8712   7
   0 -21  -2 2.15842 14.2189  16
   0 -21  -2-8.34329 20.0758  25
   0 -21  -2-2.88867 17.1004  27
   0 -21  -3 3.03022 14.0370  16
   0 -21  -3-13.6766 19.4147  25
   0 -21  -3-2.41908 16.5366  27
   0 -21  -4 0.67327 19.3727  25
   0 -21  -4 2.59349 13.7509  16
   0 -21  -4 4.83983 16.6864  27
   0 -21  -5 1.30910 17.8795  25
   0 -21  -5-1.44698 17.0323  27
   0 -21  -5-3.87246 14.3054  16
   0 -21  -6 135.078 21.7071  27
   0 -21  -6 134.533 18.9610  16
   0 -21  -6 118.326 22.1932  25
   0 -21  -7 31.2173 18.0889  25
   0 -21  -7 64.9771 18.6018  27
   0 -21  -7 44.3642 14.7383  16
   0  21   7 24.6611 11.6412  12
   0 -21  -8-8.16544 16.0711  25
   0  21   8-3.18254 10.5620  12
   0 -21  -8 10.7721 16.4608  27
   0 -21  -8 4.58282 13.9603  16
   0 -21  -9 50.4110 16.6476  25
   0  21   9 49.7985 11.3062  13
   0  21   9 48.1827 12.0778  12
   0 -21  -9 54.3892 18.1044  27
   0 -21  -9 81.4916 15.8190  16
   0  21  10-7.51147 10.7713  12
   0 -21 -10-10.8456 15.7126  27
   0 -21 -10 4.41225 12.7501  16
   0 -21 -10 5.18087 13.8860  25
   0  21  10 5.41505 9.43040  13
   0  21  11 5.56448 10.0449  12
   0 -21 -11 5.07636 13.3465  16
   0 -21 -11 33.4988 17.2337  27
   0  21  11 28.2706 10.5017  13
   0  21  12 17.8686 9.99142  12
   0 -21 -12 10.1800 12.5922  16
   0 -21 -12 23.4764 16.0191  27
   0  21  12 17.0149 10.3266  13
   0 -21 -13 5.73653 14.8643  27
   0 -21 -13 4.69519 12.2425  16
   0  21  13 10.8040 9.89308  13
   0  21  13 17.1173 8.99763  12
   0  21  14 48.1965 9.59989  12
   0 -21 -14 61.8884 15.5608  27
   0  21  14 47.2187 11.0326  13
   0 -21 -14 51.6212 13.3256  16
   0 -21 -15 6.93385 13.4659  27
   0 -21 -15 10.5374 11.2202  16
   0  21  15-0.83616 9.69014  13
   0 -21 -16 54.8864 13.8331  27
   0 -21 -16 47.4726 12.0330  16
   0  21  16 34.1283 10.2987  13
   0 -21 -17 30.2229 10.6848  16
   0 -21 -17 42.6196 12.0234  27
   0  21  17 69.1241 10.4623  13
   0 -21 -18-7.23478 10.2134  27
   0  21  18 4.91931 8.17296  13
   0 -21 -18-2.28398 8.81010  16
   0  21  19 77.9707 9.87564  13
   0 -21 -19 71.9558 10.2168  16
   0 -21 -19 95.3976 11.6073  27
   0 -22   6 22.3249 14.4249  25
   0 -22   5-0.48508 15.1722  25
   0 -22   4 31.7798 17.4910  25
   0 -22   3 17.0147 18.4748  25
   0 -22   2-20.2524 19.6258  25
   0 -22   1 51.2041 16.0882  27
   0 -22   1 24.0064 19.7070  25
   0 -22   0 0.37043 12.7401  16
   0 -22   0 23.8439 19.8302  25
   0 -22   0-7.48178 15.7639  27
   0 -22  -1-15.3595 15.7099  27
   0 -22  -1-5.05605 19.4878  25
   0 -22  -1-13.6841 13.2425  16
   0 -22  -2 18.2955 19.2503  25
   0 -22  -2-6.09227 16.0563  27
   0 -22  -2 16.6353 13.6753  16
   0 -22  -3-5.28622 16.4753  27
   0 -22  -3-28.7326 19.4412  25
   0 -22  -3-11.3347 13.4563  16
   0 -22  -4 4.90625 18.0459  25
   0 -22  -4 11.3791 14.0045  16
   0 -22  -4 15.9315 16.2804  27
   0 -22  -5 9.40434 13.4689  16
   0 -22  -5 23.8936 17.0242  27
   0 -22  -5 25.8538 18.0994  25
   0 -22  -6 28.4186 14.5065  16
   0 -22  -6 34.7656 17.3252  27
   0 -22  -6 22.0579 17.0833  25
   0 -22  -7 49.1804 17.4862  25
   0 -22  -7 85.3397 18.2651  27
   0 -22  -7 75.4515 15.1665  16
   0 -22  -8 18.9385 13.2771  16
   0 -22  -8 16.7139 16.0263  27
   0 -22  -8 2.64042 14.6740  25
   0 -22  -9 94.5684 18.8330  27
   0 -22  -9 61.8503 16.3495  25
   0 -22  -9 93.3628 15.6328  16
   0  22  10-3.43849 9.74409  12
   0 -22 -10-0.90721 13.2684  25
   0 -22 -10-4.50097 15.1912  27
   0 -22 -10 9.72047 12.6083  16
   0 -22 -11 8.69058 12.5383  16
   0 -22 -11-1.97800 14.3468  27
   0  22  11 1.48055 8.67760  13
   0  22  11-21.0925 9.72527  12
   0  22  12 119.630 13.3028  13
   0  22  12 105.486 13.0623  12
   0 -22 -12 120.340 16.4959  16
   0 -22 -13-16.3628 11.2515  16
   0  22  13-13.3828 8.06700  12
   0  22  13 2.64512 8.12296  13
   0 -22 -13-16.2255 13.7018  27
   0 -22 -14 39.3738 11.9825  16
   0  22  14 35.4745 9.10523  13
   0 -22 -14 41.2764 13.6492  27
   0 -22 -15-10.5158 10.2445  16
   0 -22 -15-15.6341 11.4692  27
   0  22  15-8.30137 7.85764  13
   0 -22 -16-16.4397 11.1301  27
   0 -22 -16 0.24197 8.87827  16
   0  22  16 6.42727 7.58633  13
   0 -22 -17 4.20725 8.09071  16
   0 -22 -17 12.7728 9.68664  27
   0  22  17 21.1022 7.33994  13
   0 -22 -18 5.11933 7.94726  27
   0 -22 -18 5.74537 7.07208  16
   0  22  18 7.60032 6.12315  13
   0 -23   5 20.2485 13.7146  25
   0 -23   4 29.1716 14.7414  25
   0 -23   3 10.2930 15.0308  25
   0 -23   2 10.0716 15.8320  25
   0 -23   1 5.05276 16.4751  25
   0 -23   1-7.90909 12.3721  27
   0 -23   0-2.09230 16.5752  25
   0 -23   0-11.8177 14.0282  27
   0 -23  -1-13.3379 17.7270  25
   0 -23  -1 1.44981 13.4440  27
   0 -23  -1 13.7117 11.9902  16
   0 -23  -2-14.9454 14.6095  27
   0 -23  -2-8.60589 16.9414  25
   0 -23  -2-19.0364 12.2856  16
   0 -23  -3 49.0906 17.9854  25
   0 -23  -3 42.6684 14.8504  27
   0 -23  -3 52.5353 13.3253  16
   0 -23  -4-0.53165 16.1377  25
   0 -23  -4-0.38567 14.2427  27
   0 -23  -4-3.04373 11.8585  16
   0 -23  -5-15.0244 15.5755  25
   0 -23  -5 6.44512 11.9436  16
   0 -23  -5 9.29956 14.6501  27
   0 -23  -6 92.5549 15.0729  16
   0 -23  -6 69.7988 17.6104  25
   0 -23  -6 103.170 17.0663  27
   0 -23  -7 3.83974 14.1944  25
   0 -23  -7 4.97316 14.1390  27
   0 -23  -7 15.3675 12.4098  16
   0 -23  -8 95.8941 17.1344  27
   0 -23  -8 69.8590 14.2689  16
   0 -23  -8 75.2466 15.8709  25
   0 -23  -9 7.39369 12.8114  25
   0 -23  -9 9.53972 14.0992  27
   0 -23  -9-3.19617 11.4137  16
   0 -23 -10-1.23539 10.8698  16
   0 -23 -10 10.6728 13.4661  27
   0 -23 -11 78.8323 15.2768  27
   0 -23 -11 73.9133 13.1123  16
   0 -23 -12-4.47282 10.5844  16
   0 -23 -12 18.4973 12.3479  27
   0 -23 -13 44.4453 12.1953  27
   0 -23 -13 41.2117 10.7879  16
   0 -23 -14-13.3855 8.99607  16
   0 -23 -14-8.16479 10.8855  27
   0  23  14 1.44757 6.27814  13
   0 -23 -15-9.83461 8.54949  16
   0 -23 -15-0.25535 9.51611  27
   0  23  15 2.06070 6.05363  13
   0 -23 -16 29.9998 8.91208  27
   0 -23 -16 16.0621 7.58673  16
   0  23  16 20.9527 5.83788  13
   0 -24   2 30.0839 12.9634  25
   0 -24   1 13.4012 13.1409  25
   0 -24   0 10.1382 13.5993  25
   0 -24   0-0.54225 10.3365  27
   0 -24  -1 8.36087 10.9604  27
   0 -24  -1 22.7314 14.2352  25
   0 -24  -2 4.75059 13.5660  25
   0 -24  -2-14.7641 11.6087  27
   0 -24  -3 16.9155 14.4843  25
   0 -24  -3 9.02500 12.2635  27
   0 -24  -3 1.07416 10.0332  16
   0 -24  -4 12.0770 12.4804  27
   0 -24  -4-0.27392 10.3909  16
   0 -24  -4 11.1499 14.1117  25
   0 -24  -5-1.93566 10.4281  16
   0 -24  -5-15.4213 12.5825  27
   0 -24  -5-5.45794 13.1791  25
   0 -24  -6 9.22810 12.6248  25
   0 -24  -6 10.5007 10.5801  16
   0 -24  -6 45.0214 13.2179  27
   0 -24  -7 9.81704 11.8317  25
   0 -24  -7 5.46954 10.0502  16
   0 -24  -7-1.59491 12.4463  27
   0 -24  -8-2.19368 11.9699  27
   0 -24  -8 1.60794 9.85012  16
   0 -24  -8 7.24305 10.8612  25
   0 -24  -9 36.1284 10.7918  16
   0 -24  -9 32.6749 12.4691  27
   0 -24 -10 12.6433 11.2178  27
   0 -24 -10 13.2105 9.48225  16
   0 -24 -11 53.9916 12.1439  27
   0 -24 -11 49.0401 10.3413  16
   0 -24 -12 22.6157 10.7906  27
   0 -24 -12 10.7540 8.47615  16
   0 -24 -13 13.3701 9.66286  27
   0 -24 -13 9.39828 7.82236  16
   0 -24 -14 48.1276 8.48229  16
   0 -24 -14 57.9454 10.1013  27
   0 -25  -2 20.0023 9.20442  27
   0 -25  -2 16.4137 10.3694  25
   0 -25  -3 49.3363 10.5271  27
   0 -25  -3 26.5206 10.9765  25
   0 -25  -4 2.90725 9.55379  27
   0 -25  -4 15.6360 10.2701  25
   0 -25  -5 33.6753 10.5348  25
   0 -25  -5 30.1659 10.2413  27
   0 -25  -5 18.1104 8.34669  16
   0 -25  -6 12.1783 9.49602  25
   0 -25  -6-8.47981 8.01806  16
   0 -25  -6-7.22087 9.95714  27
   0 -25  -7 6.19032 9.43431  27
   0 -25  -7-1.63956 7.82866  16
   0 -25  -7 3.46100 8.37611  25
   0 -25  -8 0.73040 9.54371  27
   0 -25  -8 8.40794 8.02297  16
   0 -25  -9-0.23587 9.50880  27
   0 -25  -9 1.73243 7.55883  16
   0 -25 -10 28.8335 9.60135  27
   0 -25 -10 26.1763 8.15665  16
   0 -25 -11-5.50553 8.56156  27
   0 -25 -11 12.2577 7.05364  16
   1 -25  -9-3.09193 8.62480  27
   1 -25  -9 0.29005 5.96878  16
   1 -25  -8 8.80451 9.23364  27
   1 -25  -8 4.48671 6.36540  16
   1 -25  -7-4.34668 6.61353  16
   1 -25  -7-5.95346 8.85488  27
   1 -25  -6 16.0674 9.23004  27
   1 -25  -5-0.22269 8.78152  27
   1 -25  -4 6.12836 8.87592  27
   1 -25  -4 9.86715 7.67145  25
   1 -25  -3 8.09900 7.85713  25
   1 -25  -3 15.0270 9.58928  27
   1 -24 -13 121.790 13.0816  27
   1 -24 -13 116.745 11.2556  16
   1 -24 -12 6.57164 7.21106  16
   1 -24 -12 3.23182 8.84536  27
   1 -24 -11 24.7108 7.95592  16
   1 -24 -11 24.1573 10.3821  27
   1 -24 -10 38.2329 9.05659  16
   1 -24 -10 47.0923 11.7547  27
   1 -24  -9 7.65632 8.26949  16
   1 -24  -9 10.5143 11.0736  27
   1 -24  -8 36.9225 9.61815  16
   1 -24  -8 60.1304 12.7950  27
   1 -24  -7 2.81246 8.49791  16
   1 -24  -7 2.34437 11.3768  27
   1 -24  -6 11.1780 10.2974  25
   1 -24  -6-6.90478 9.23343  16
   1 -24  -6-3.56271 11.6690  27
   1 -24  -5 4.16870 11.4974  27
   1 -24  -5 6.20587 11.1948  25
   1 -24  -5-2.39056 8.88541  16
   1 -24  -4 0.71181 8.79670  16
   1 -24  -4 3.54746 11.5745  27
   1 -24  -4 14.7998 12.0373  25
   1 -24  -3 41.5178 12.1114  27
   1 -24  -3 60.1022 13.4966  25
   1 -24  -2 5.35133 10.9765  27
   1 -24  -2-1.11552 12.2154  25
   1 -24  -1 9.91270 12.3323  25
   1 -24  -1 15.3581 10.8569  27
   1 -24   0 15.9845 12.4560  25
   1 -24   0-5.59036 9.89887  27
   1 -24   1 7.96700 9.58133  27
   1 -24   1 18.4754 11.8683  25
   1 -23 -15 10.1077 8.47461  27
   1 -23 -15 3.12757 6.72371  16
  -1  23  15 10.1992 5.94437  13
   1 -23 -14 91.9467 10.8973  16
  -1  23  14 82.4431 9.74146  13
   1 -23 -14 86.9649 12.2461  27
   1 -23 -13 9.12617 8.40457  16
   1 -23 -13 13.8801 10.7205  27
  -1  23  13 1.53428 6.94988  13
  -1  23  12 32.6049 7.93501  13
   1 -23 -12 47.8966 12.3159  27
   1 -23 -12 35.2003 9.85305  16
   1 -23 -11 42.7401 12.3930  27
   1 -23 -11 14.7990 9.68413  16
   1 -23 -10 22.6161 12.7163  27
   1 -23 -10 14.5632 10.3569  16
   1 -23  -9 211.385 19.7562  16
   1 -23  -9 213.682 21.9264  27
   1 -23  -8 7.56250 10.7606  16
   1 -23  -8 19.2858 13.1191  27
   1 -23  -7 9.23263 12.4333  25
   1 -23  -7-6.55166 10.7418  16
   1 -23  -7 5.37505 13.5345  27
   1 -23  -6 14.5337 13.8422  27
   1 -23  -6 23.3229 13.5291  25
   1 -23  -6-20.2591 11.1005  16
   1 -23  -5-8.68589 14.0836  25
   1 -23  -5 7.67750 14.3762  27
   1 -23  -5 3.65414 10.5753  16
   1 -23  -4 39.2224 15.5228  25
   1 -23  -4 29.5695 14.8683  27
   1 -23  -4 24.6359 11.6680  16
   1 -23  -3 15.9064 13.3929  27
   1 -23  -3-6.92589 11.0306  16
   1 -23  -3-6.73902 14.9315  25
   1 -23  -2 1.18136 10.8089  16
   1 -23  -2 8.87247 13.4449  27
   1 -23  -2 13.1403 15.2730  25
   1 -23  -1 19.9016 16.3995  25
   1 -23  -1 11.0385 13.5608  27
   1 -23   0 15.2698 15.8167  25
   1 -23   0 7.30249 12.8599  27
   1 -23   1 26.7812 16.3674  25
   1 -23   1 39.0151 13.2774  27
   1 -23   2 4.40042 10.9454  27
   1 -23   2 9.66833 14.6936  25
   1 -23   3 18.4328 14.5784  25
   1 -23   3 8.59292 10.2035  27
   1 -23   4 16.9962 9.63722  27
   1 -23   4 4.45995 12.5211  25
  -1  22  17 9.81211 6.83063  13
   1 -22 -17 4.66611 8.08508  27
   1 -22 -17-6.54522 6.56538  16
   1 -22 -16 22.0108 9.55337  27
   1 -22 -16 9.37668 8.05676  16
  -1  22  16 21.9421 7.79512  13
   1 -22 -15-0.83493 10.3406  27
   1 -22 -15-7.44847 9.04455  16
  -1  22  15 16.6640 8.25854  13
   1 -22 -14 76.3140 11.8239  16
   1 -22 -14 110.313 14.3984  27
  -1  22  14 89.4605 11.1007  13
  -1  22  13 14.5567 8.86082  13
   1 -22 -13-2.63519 12.1261  27
   1 -22 -13-1.09755 9.87015  16
  -1  22  13-3.03682 8.16053  12
   1 -22 -12 21.0188 12.9842  27
  -1  22  12 10.4554 8.67588  12
  -1  22  12 14.3379 8.62014  13
   1 -22 -12-0.88105 10.8691  16
   1 -22 -11 53.6867 12.6407  16
  -1  22  11 37.1569 10.4886  12
  -1  22  11 57.5875 10.7065  13
   1 -22 -11 66.2238 15.4168  27
   1 -22 -10 31.0368 14.5687  27
   1 -22 -10 22.3599 12.0634  16
  -1  22  10 10.8103 10.4391  12
  -1  22  10 9.84186 9.15676  13
   1 -22  -9 80.8856 13.9720  16
  -1  22   9 48.8895 11.9213  12
  -1  22   9 67.4429 11.0669  13
   1 -22  -8 11.8670 13.7844  25
   1 -22  -8 10.3444 11.9417  16
   1 -22  -8 30.8438 15.5437  27
   1 -22  -7 0.82818 15.5071  27
   1 -22  -7 6.88605 14.0939  25
   1 -22  -7 6.68670 12.6841  16
   1 -22  -6 52.5063 16.1804  25
   1 -22  -6 76.4434 17.4882  27
   1 -22  -6 46.7781 13.9760  16
   1 -22  -5-2.72563 16.3292  25
   1 -22  -5-9.00634 12.9005  16
   1 -22  -5-8.89597 15.6093  27
   1 -22  -4 5.52250 15.2880  27
   1 -22  -4-5.78154 12.3036  16
   1 -22  -4 0.56135 16.5735  25
   1 -22  -3 15.6617 15.9464  27
   1 -22  -3-7.56510 12.5786  16
   1 -22  -3-1.15162 16.8143  25
   1 -22  -2-5.70677 11.8604  16
   1 -22  -2-20.3449 17.5773  25
   1 -22  -2-15.0841 16.2127  27
   1 -22  -1 16.8160 12.7952  16
   1 -22  -1 34.9870 16.1864  27
   1 -22  -1 18.7092 18.5242  25
   1 -22   0 3.49029 18.3601  25
   1 -22   0 6.42602 14.5715  27
   1 -22   1 26.8908 18.7807  25
   1 -22   1 34.0653 15.5177  27
   1 -22   2 8.33319 17.7238  25
   1 -22   2 28.4402 14.3879  27
   1 -22   3 19.1056 17.6632  25
   1 -22   3 1.73353 12.8685  27
   1 -22   4 34.8294 17.7778  25
   1 -22   4 30.1076 13.3608  27
   1 -22   5 0.91507 15.3889  25
   1 -22   5 10.9834 11.4829  27
   1 -22   6 13.8319 14.1332  25
   1 -22   6 10.9191 10.0352  27
   1 -21 -18 28.9173 8.02682  16
  -1  21  18 29.0933 8.24855  13
   1 -21 -18 37.7576 9.42813  27
   1 -21 -17 51.6197 11.3984  27
   1 -21 -17 33.5156 9.47501  16
  -1  21  17 44.5892 9.67974  13
   1 -21 -16-11.2574 9.52959  16
   1 -21 -16-4.22307 11.4893  27
  -1  21  16 3.00470 8.68951  13
   1 -21 -15 124.739 15.7962  27
  -1  21  15 90.3955 11.3011  12
   1 -21 -15 98.0318 13.4350  16
  -1  21  15 101.860 13.1006  13
  -1  21  14 14.6254 8.60669  12
   1 -21 -14 1.07386 13.5860  27
   1 -21 -14 1.81925 11.0234  16
  -1  21  14 9.14816 9.74937  13
   1 -21 -13-2.91667 11.8583  16
  -1  21  13-6.54809 10.0832  13
   1 -21 -13-1.90238 13.7079  27
  -1  21  13 7.65383 9.08766  12
  -1  21  12 109.678 13.9498  12
  -1  21  12 92.0213 13.7562  13
   1 -21 -12 140.254 18.5230  27
   1 -21 -12 121.993 15.9844  16
   1 -21 -11-7.84485 12.1611  16
  -1  21  11-8.96952 10.2223  13
  -1  21  11-12.3272 10.0623  12
   1 -21 -11 3.32520 14.6960  27
   1 -21 -10 183.664 21.6390  27
  -1  21  10 158.938 17.0347  12
   1 -21 -10 145.676 18.8389  16
  -1  21  10 143.396 16.4735  13
   1 -21  -9 10.5571 15.9086  27
  -1  21   9 22.1152 10.5559  13
   1 -21  -9 10.6150 13.1961  16
  -1  21   9 27.2349 11.7342  12
   1 -21  -8 2.24544 15.4161  27
   1 -21  -8 8.91502 14.4366  25
  -1  21   8-9.95978 9.96160  13
  -1  21   8-10.2239 11.3198  12
   1 -21  -8 13.9510 12.7818  16
   1 -21  -7 105.143 19.7136  25
   1 -21  -7 111.183 17.1363  16
  -1  21   7 91.7602 15.3939  12
  -1  21   7 128.650 14.6226  13
   1 -21  -6-4.65940 16.2643  25
   1 -21  -6 20.7729 13.6971  16
   1 -21  -6 0.46270 15.9725  27
  -1  21   6-3.31344 11.3000  12
   1 -21  -5 51.6134 14.6297  16
   1 -21  -5 69.1536 17.8215  27
   1 -21  -5 58.3628 19.0567  25
   1 -21  -4 4.37806 17.3986  25
   1 -21  -4 2.82043 17.1817  27
   1 -21  -4-4.05699 13.0992  16
   1 -21  -3-18.8353 17.2102  27
   1 -21  -3-11.7872 14.2476  16
   1 -21  -3-30.2194 18.8333  25
   1 -21  -2 60.3997 21.3812  25
   1 -21  -2 113.301 20.0493  27
   1 -21  -2 69.7511 15.7906  16
   1 -21  -1 2.41447 13.2657  16
   1 -21  -1-21.4420 17.3692  27
   1 -21  -1-12.5636 19.6770  25
   1 -21   0 59.8231 22.4812  25
   1 -21   0 51.5389 14.8090  16
   1 -21   0 51.8795 18.3218  27
   1 -21   1 41.4610 14.8889  16
   1 -21   1 38.4421 21.5848  25
   1 -21   1 46.2867 17.3161  27
   1 -21   2 3.91380 16.2396  27
   1 -21   2 0.65387 20.5739  25
   1 -21   3 107.743 18.6220  27
   1 -21   3 50.9332 22.5603  25
   1 -21   4 10.4202 20.4504  25
   1 -21   4 4.72050 15.1428  27
   1 -21   5-2.30722 18.5067  25
   1 -21   5 19.0248 14.6263  27
   1 -21   6 17.5293 17.9768  25
   1 -21   6 17.9817 12.7601  27
   1 -21   7-0.47766 15.7557  25
   1 -21   7 5.92351 11.5550  27
   1 -21   8 5.81420 9.65086   8
   1 -21   8 5.09634 9.96799  27
   1 -21   8 1.65118 13.8447  25
  -1  20  20 11.2192 7.55901  13
   1 -20 -20-2.28481 5.77260  16
   1 -20 -20-2.46967 7.44941  27
   1 -20 -19 0.95224 8.60840  27
  -1  20  19 5.48701 8.00313  13
   1 -20 -19 2.86902 7.79948  16
   1 -20 -18 33.6523 11.2074  27
  -1  20  18 37.8613 9.84787  13
  -1  20  17 56.9616 11.4449  13
   1 -20 -17 69.6616 13.7765  27
   1 -20 -16-19.6593 13.6005  27
  -1  20  16 0.30537 10.3924  13
  -1  20  16-4.44238 8.34405  12
  -1  20  15 15.4988 9.30744  12
   1 -20 -15 22.3904 14.0913  27
  -1  20  15 20.6822 10.6799  13
   1 -20 -14-10.4929 14.9946  27
  -1  20  14 9.36464 9.61704  12
  -1  20  14 8.10062 10.5384  13
   1 -20 -13 12.0547 12.2596  16
   1 -20 -13 13.1306 15.0945  27
  -1  20  13 16.2236 10.2840  12
  -1  20  13 23.6411 11.2417  13
   1 -20 -12 41.0625 13.4932  16
  -1  20  12 26.8061 12.1177  13
   1 -20 -12 50.5415 16.4469  27
  -1  20  12 38.9041 11.9518  12
  -1  20  11 12.5367 11.0218  12
   1 -20 -11 14.0247 15.5735  27
   1 -20 -11 30.2034 13.3870  16
  -1  20  11 27.7204 11.6236  13
   1 -20 -10-12.4662 13.2046  16
  -1  20  10-13.8215 11.5056  12
  -1  20  10-12.3896 11.5163  13
   1 -20 -10 14.3457 15.0470  27
   1 -20  -9 17.6210 13.1169  16
  -1  20   9 24.1568 11.3520  13
  -1  20   9 2.19583 11.5457  12
   1 -20  -9 13.6668 15.4259  27
   1 -20  -8 49.1160 14.4887  16
   1 -20  -8 35.6084 15.9414  25
  -1  20   8 36.5713 12.9661  12
  -1  20   8 47.1362 11.9779  13
   1 -20  -8 49.2623 17.7081  27
  -1  20   7 116.292 15.0665  13
  -1  20   7 110.347 16.4839  12
   1 -20  -7 127.386 18.0508  16
   1 -20  -7 92.5217 19.2038  25
  -1  20   6 0.65078 10.0010  13
   1 -20  -6 7.25269 13.5177  16
   1 -20  -6-1.95915 15.7414  27
  -1  20   6 12.5307 11.6547  12
   1 -20  -6 13.6730 16.3376  25
   1 -20  -5 26.7042 16.9162  27
   1 -20  -5 19.9186 17.3058  25
  -1  20   5-5.15791 11.6074  12
   1 -20  -5 19.3848 13.8487  16
   1 -20  -4 12.4602 16.8561  27
   1 -20  -4 14.3233 13.7114  16
   1 -20  -4-4.65860 18.2355  25
  -1  20   4-25.2096 12.7063  12
   1 -20  -3-11.0284 16.8345  27
   1 -20  -3 9.54041 18.6906  25
   1 -20  -3-9.60688 13.8353  16
   1 -20  -2 15.3858 20.3377  25
   1 -20  -2 28.1488 17.4160  27
   1 -20  -2 22.7778 13.9954  16
   1 -20  -1 7.03074 17.1330  27
   1 -20  -1 7.88539 14.1366  16
   1 -20  -1-10.7094 20.7243  25
   1 -20   0-0.87248 13.8066  16
   1 -20   0 3.00102 16.8903  27
   1 -20   0 1.44912 20.4581  25
   1 -20   1 3.88665 14.3901  16
   1 -20   1-12.4337 21.1028  25
   1 -20   1 21.2634 17.5265  27
   1 -20   2 14.0068 14.6905  16
   1 -20   2 0.48639 17.4877  27
   1 -20   2-6.58896 21.6357  25
   1 -20   3 25.3693 22.4213  25
   1 -20   3 38.3334 18.2710  27
   1 -20   4 29.0254 22.8319  25
   1 -20   4 34.6550 17.7635  27
   1 -20   5 17.6980 22.1706  25
   1 -20   5 23.7934 16.7100  27
   1 -20   5 10.3775 12.2865   7
   1 -20   6 33.5457 21.6127  25
   1 -20   6 20.5689 12.0772   7
   1 -20   6 20.6353 15.2385  27
   1 -20   7 10.7258 19.2102  25
   1 -20   7 9.26706 14.0155  27
   1 -20   8-10.9675 12.7216  27
   1 -20   8-16.1359 17.6406  25
   1 -20   9 10.4996 11.1337   8
   1 -20   9 2.31431 10.9735  27
   1 -20  10 0.27839 9.78997   8
  -1  19  21 29.1652 8.54351  13
   1 -19 -21 32.0748 8.28132  27
   1 -19 -20 44.5374 10.0106  27
  -1  19  20 33.4993 9.55263  13
  -1  19  19-9.30788 10.0126  29
  -1  19  19-4.05428 9.62706  13
  -1  19  18 110.614 15.3113  29
  -1  19  18 123.191 15.0405  13
   1 -19 -18 143.171 15.5209  31
  -1  19  17-2.33947 8.07929  12
   1 -19 -17 11.5594 10.9830  31
  -1  19  17 7.94544 11.0438  13
  -1  19  16 97.4424 15.0322  13
  -1  19  16 84.2681 16.2646  29
   1 -19 -16 132.011 16.2378  31
  -1  19  16 122.718 13.0960  12
  -1  19  15 245.195 22.5726  13
  -1  19  15 220.833 20.4003  12
  -1  19  15 185.629 24.2341  29
  -1  19  14-9.15820 10.2667  12
  -1  19  14-4.19614 12.1436  13
  -1  19  13 207.174 19.3928  12
  -1  19  13 198.109 20.0744  13
  -1  19  13 150.390 22.3370  29
  -1  19  12-1.37323 10.6592  12
  -1  19  12 6.23895 11.7884  13
   1 -19 -12 5.61599 15.5762  27
  -1  19  11 18.7082 11.8670  13
   1 -19 -11 18.5918 15.7327  27
  -1  19  11 17.1369 10.8971  12
  -1  19  11 14.0586 14.6289  29
  -1  19  10 118.781 16.9302  13
   1 -19 -10 161.950 21.4318  27
  -1  19  10 148.111 17.4538  12
  -1  19   9 2.64689 11.4234  12
  -1  19   9 2.27794 11.3960  13
   1 -19  -9-11.2324 16.2902  27
   1 -19  -9-5.55531 13.3364  16
   1 -19  -8 152.211 18.7440  16
   1 -19  -8 159.097 20.5715  27
  -1  19   8 119.482 16.2234  13
   1 -19  -8 128.924 19.9893  25
  -1  19   8 121.812 17.4310  12
   1 -19  -7 27.8372 14.2990  16
  -1  19   7 37.0166 13.3088  12
  -1  19   7 40.7122 11.8690  13
   1 -19  -7 39.2020 17.2206  27
   1 -19  -7 48.1271 17.2137  25
  -1  19   6 6.40234 11.5640  12
   1 -19  -6-5.49831 15.6455  27
   1 -19  -6-3.94792 13.6790  16
  -1  19   6 2.11560 10.4538  13
   1 -19  -6-6.30741 15.7676  25
   1 -19  -5 171.787 22.5872  27
  -1  19   5 130.515 17.7708  12
   1 -19  -5 156.181 20.0627  16
  -1  19   5 148.649 17.3339  13
   1 -19  -5 177.604 23.7886  25
  -1  19   4 3.27713 12.0719  12
   1 -19  -4 20.8189 16.7827  27
   1 -19  -4 34.3775 18.5676  25
   1 -19  -4-2.23105 14.0445  16
   1 -19  -3 260.094 25.8989  27
  -1  19   3 169.707 21.3717  12
   1 -19  -3 219.079 23.0030  16
   1 -19  -3 206.198 27.1931  25
   1 -19  -2 37.1728 15.6592  16
   1 -19  -2 79.7170 21.5276  25
   1 -19  -2 93.0100 18.5863  27
   1 -19  -1 7.27428 16.9457  27
   1 -19  -1 23.6175 19.8062  25
   1 -19  -1-2.73819 14.7723  16
   1 -19   0 209.429 24.8740  16
   1 -19   0 245.446 27.2069  27
   1 -19   0 205.437 30.1381  25
   1 -19   1 15.1373 14.7685  16
   1 -19   1 28.6678 18.4038  27
   1 -19   1 11.5600 22.3059  25
   1 -19   2-21.0881 23.6323  25
   1 -19   2 11.8711 14.7425  16
   1 -19   2-11.9135 16.8184  27
   1 -19   2 0.99090 13.2528   7
   1 -19   3 11.7818 17.7011  27
   1 -19   3 25.6644 14.3647   7
   1 -19   3 21.1921 22.7433  25
   1 -19   4 1.56018 23.9870  25
   1 -19   4 4.86442 13.8652   7
   1 -19   4 24.5563 17.4602  27
   1 -19   5 66.8497 16.3638   7
   1 -19   5 112.733 21.0835  27
   1 -19   5 84.9333 26.7498  25
   1 -19   6-7.41477 24.3073  25
   1 -19   6 4.08135 13.6009   7
   1 -19   6-8.82729 17.1391  27
   1 -19   7 4.27100 12.4114   7
   1 -19   7 24.8631 15.9635  27
   1 -19   7-6.31232 22.6220  25
   1 -19   8-2.59585 21.5263  25
   1 -19   8 26.6937 12.8223   7
   1 -19   8 29.7785 15.6378  27
   1 -19   9-17.8118 11.9435   7
   1 -19   9-20.6851 13.7503  27
   1 -19  10 35.6316 11.2651   7
   1 -19  10 29.9610 12.6009   8
   1 -19  11 1.70613 14.2955  25
   1 -19  11 6.01574 10.6891   8
  -1  18  21-10.9970 7.55420  29
  -1  18  21 0.23253 8.68876  13
   1 -18 -21 16.8500 7.85327  31
  -1  18  21 3.95211 6.00762  19
  -1  18  20 37.7788 10.6642  13
  -1  18  20 20.3619 7.86595  19
   1 -18 -20 33.1532 10.2288  31
  -1  18  20 18.3315 9.90134  29
  -1  18  19 5.08643 10.6794  13
   1 -18 -19 29.2155 11.4467  31
  -1  18  19-7.81529 11.5161  29
  -1  18  18 33.6650 12.3819  13
   1 -18 -18 39.6845 12.2465  31
  -1  18  18 10.4231 12.7998  29
  -1  18  17 26.3118 9.04332  12
  -1  18  17 22.9921 12.6549  13
   1 -18 -17 31.7211 12.9861  31
  -1  18  17 11.4480 12.9115  29
  -1  18  16 15.6148 14.6369  29
  -1  18  16 40.8361 13.7544  13
  -1  18  16 61.1473 11.2535  12
   1 -18 -16 34.8587 13.9658  31
  -1  18  15 85.9429 17.3206  29
  -1  18  15 85.1888 13.1347  12
  -1  18  15 89.2064 15.8970  13
   1 -18 -15 70.9715 16.2963  31
  -1  18  14 95.7212 17.3912  29
  -1  18  14 86.1677 13.3206  12
  -1  18  14 71.6282 15.2784  13
   1 -18 -14 72.0608 16.2193  31
   1 -18 -13 14.5470 14.0619  31
  -1  18  13 40.6838 13.1931  13
  -1  18  13-6.54699 16.1902  29
  -1  18  13 37.2403 11.3966  12
  -1  18  12-18.3348 12.7354  13
  -1  18  12-18.3762 15.4454  29
   1 -18 -12-6.39744 13.8085  31
  -1  18  12-0.35431 11.0353  12
  -1  18  11 4.00274 11.2030  12
  -1  18  11 4.95593 12.3368  13
   1 -18 -11-1.98537 13.4790  31
  -1  18  11-23.9571 15.5554  29
  -1  18  10-16.0387 14.9592  29
  -1  18  10 15.4088 11.7835  13
  -1  18  10 8.93676 11.6154  12
  -1  18   9-13.4902 12.0710  13
   1 -18  -9-15.2585 17.1100  27
  -1  18   9 4.17182 11.2440  12
   1 -18  -8 12.8157 15.4850  27
  -1  18   8 19.7489 12.3473  13
  -1  18   8 26.8458 12.7646  12
   1 -18  -8 42.2829 16.0921  25
   1 -18  -8 57.1839 14.1283  16
   1 -18  -7-8.39648 15.7652  27
   1 -18  -7-9.99665 13.5842  16
  -1  18   7-8.93644 12.2091  12
   1 -18  -7-9.58396 15.6168  25
  -1  18   7-4.52763 11.1147  13
   1 -18  -6 35.3694 13.8941  16
  -1  18   6 24.7739 12.7392  12
   1 -18  -6 29.8639 17.0459  25
   1 -18  -6 26.2609 15.4187  27
  -1  18   6 33.2868 11.5475  13
  -1  18   5 55.7777 11.9802  13
   1 -18  -5 81.1841 17.0820  27
  -1  18   5 39.7640 13.9448  12
   1 -18  -5 68.9498 15.8005  16
   1 -18  -5 58.2732 18.6701  25
   1 -18  -4 149.525 20.2212  27
   1 -18  -4 93.5680 21.4020  25
  -1  18   4 114.676 14.9699  13
   1 -18  -4 118.657 17.3589  16
  -1  18   4 78.4910 16.0592  12
   1 -18  -3 17.1759 18.8603  25
   1 -18  -3 12.6568 15.6355  27
  -1  18   3-2.44447 12.1923  12
   1 -18  -3 0.89504 13.6727  16
   1 -18  -2 29.1646 17.0592  27
   1 -18  -2 41.9462 19.4158  25
   1 -18  -2 35.2801 14.7404  16
  -1  18   2 7.83212 12.9917  12
   1 -18  -1 43.5225 17.6286  27
   1 -18  -1 30.1935 14.4260  16
   1 -18  -1 39.3921 21.3470  25
   1 -18   0 32.9650 16.9049  27
   1 -18   0 14.3471 14.9063  16
   1 -18   0 22.5733 21.4934  25
   1 -18   0 24.1642 14.4640   7
   1 -18   1 159.489 22.5097  27
   1 -18   1 158.163 27.4322  25
   1 -18   1 184.596 20.7683  16
  -1  18  -1 112.428 15.3919  15
   1 -18   1 139.133 19.9188   7
   1 -18   2 58.8255 16.6471  16
   1 -18   2 49.1266 15.6427   7
   1 -18   2 45.6337 18.4176  27
   1 -18   2 56.0045 23.1780  25
   1 -18   3 25.9331 15.9218  16
   1 -18   3 22.6912 15.3108   7
   1 -18   3 11.4048 22.5900  25
   1 -18   3 32.4123 18.3548  27
   1 -18   4-5.96945 14.3819   7
   1 -18   4 8.22371 23.0491  25
   1 -18   4 9.50270 17.2005  27
   1 -18   5 29.6772 18.1773  27
   1 -18   5 28.7225 24.3854  25
   1 -18   5 19.9550 14.9227   7
   1 -18   6 20.1681 14.7445   7
   1 -18   6 22.6190 24.4919  25
   1 -18   6 13.1821 17.9026  27
   1 -18   7-2.35599 24.8580  25
   1 -18   7 7.17751 14.4814   7
   1 -18   7 9.26532 18.0899  27
   1 -18   8 12.1965 14.1974   7
   1 -18   8-24.4463 17.5811  27
   1 -18   8 8.93523 23.1149  25
   1 -18   9 18.6176 13.4807   7
   1 -18   9 5.97746 15.8510  27
   1 -18  10-2.44500 12.6591   7
   1 -18  10-13.1515 14.5499  27
   1 -18  11-12.3450 12.4748   8
   1 -18  11-14.6765 17.5750  25
   1 -18  11-14.8582 11.7973   7
   1 -18  12 10.0518 11.1900   8
   1 -18  12 5.76570 9.83535   7
   1 -18  12-2.71040 15.2885  25
   1 -18  13-6.06120 10.0220   8
   1 -18  13 1.04151 7.86127   7
   1 -18  13-5.54427 11.5140  25
   1 -17 -22 9.78477 7.06041  31
  -1  17  22 9.15323 8.88019  13
  -1  17  22-5.15081 6.89087  29
   1 -17 -21 170.815 16.2237  31
  -1  17  21 152.615 16.4061  13
  -1  17  21 143.378 15.0399  29
   1 -17 -20-14.6745 10.3503  31
  -1  17  20-18.9298 10.7152  29
  -1  17  20-8.99685 11.1799  13
  -1  17  19 65.1631 13.9795  13
  -1  17  19 63.3791 13.3781  29
   1 -17 -19 81.4978 14.4164  31
  -1  17  18 16.7925 12.9929  29
  -1  17  18 39.7793 13.2624  35
   1 -17 -18 45.0759 13.3381  31
  -1  17  18 11.0026 12.7132  13
  -1  17  18 52.3984 9.62185  12
  -1  17  17-28.3163 14.8863  29
   1 -17 -17-14.2529 13.7585  31
  -1  17  17-7.49580 12.6274  13
  -1  17  17-15.6961 13.4422  35
  -1  17  17 2.72112 9.11239  12
  -1  17  16 541.094 42.6141  13
  -1  17  16 567.318 42.6477  29
  -1  17  16 503.290 42.5792  35
   1 -17 -16 532.631 42.9975  31
  -1  17  16 556.729 40.5671  12
   1 -17 -15 13.1003 14.4465  31
  -1  17  15 17.1659 12.9217  13
  -1  17  15 21.3351 13.2995  35
  -1  17  15 17.0934 15.1265  29
  -1  17  15 27.2587 11.4087  12
   1 -17 -14 420.029 37.3987  31
  -1  17  14 478.489 35.4109  12
  -1  17  14 471.647 37.4503  29
  -1  17  14 418.495 36.5518  13
  -1  17  13 269.945 23.2405  12
  -1  17  13 254.797 25.8157  29
  -1  17  13 219.495 24.3664  13
   1 -17 -13 250.400 25.4574  31
  -1  17  12 6.92550 12.6857  13
   1 -17 -12-5.51344 14.2965  31
  -1  17  12 7.48318 10.7337  12
  -1  17  12 6.24216 15.5094  29
  -1  17  11 81.8847 13.6793  12
  -1  17  11 72.8417 15.1776  13
   1 -17 -11 74.4303 16.2962  31
  -1  17  11 62.2163 16.3128  29
   1 -17 -10-19.8723 15.1074  31
  -1  17  10 4.02278 10.8191  12
  -1  17  10-22.7713 15.4999  29
   1 -17  -9 9.87539 13.4742  31
  -1  17   9 10.8768 11.8988  13
  -1  17   9 24.7120 11.8285  12
  -1  17   8 143.083 18.0147  12
   1 -17  -8 136.971 20.3279  25
  -1  17   8 179.930 18.7268  13
  -1  17   7 3.41726 11.0499  13
   1 -17  -7 7.67258 15.0325  27
   1 -17  -7-0.57648 14.5455  25
  -1  17   7-3.36862 12.0516  12
  -1  17   6 642.751 49.7634  13
   1 -17  -6 558.835 52.0088  25
   1 -17  -6 679.967 50.7926  16
   1 -17  -6 751.388 52.3915  27
  -1  17   6 731.076 50.6377  12
   1 -17  -5 15.9239 15.7105  25
   1 -17  -5 10.0781 14.6440  27
  -1  17   5 8.37269 11.4717  12
  -1  17   5 23.1815 11.1120  13
   1 -17  -5 11.8903 13.2368  16
   1 -17  -4 102.981 17.2373  16
   1 -17  -4 125.880 18.9766  27
  -1  17   4 116.180 16.5403  12
   1 -17  -4 122.410 20.7065  25
  -1  17   4 127.042 15.4836  13
   1 -17  -3 374.226 32.8042  16
   1 -17  -3 447.403 34.5522  27
   1 -17  -3 345.954 36.1238  25
  -1  17   3 384.121 32.1350  12
  -1  17   3 373.592 30.8935  13
   1 -17  -2 34.4857 16.1924  27
  -1  17   2 12.6568 12.1131  12
   1 -17  -2-9.19141 13.4849  16
   1 -17  -2 2.71016 17.9081  25
  -1  17   1 164.363 21.2174  12
   1 -17  -1 209.666 22.2349  16
   1 -17  -1 194.861 27.1935  25
   1 -17  -1 240.820 24.0216  27
   1 -17   0 10.3927 13.8269  16
   1 -17   0 8.64513 14.5186  27
   1 -17   0 13.1411 19.1680  25
  -1  17   0-2.21291 9.69100  15
   1 -17   1 51.7481 16.2380   7
   1 -17   1 81.1603 23.6183  25
   1 -17   1 66.1950 15.8044  16
   1 -17   1 111.709 18.6652  27
  -1  17  -1 41.1904 12.0751  15
   1 -17   2 47.7308 15.6785   7
   1 -17   2 78.5596 23.9473  25
   1 -17   2 69.7363 18.3994  27
  -1  17  -2 22.8924 11.3299  15
   1 -17   2 61.2198 15.7851  16
   1 -17   3 10.6212 16.7831  27
   1 -17   3 9.00307 14.6599  16
   1 -17   3 15.7389 14.9707   7
   1 -17   3 26.0704 22.4241  25
   1 -17   4 163.601 22.9280  27
   1 -17   4 129.601 21.0502   7
   1 -17   4 151.724 29.5541  25
   1 -17   4 164.114 21.0361  16
   1 -17   5 41.2499 18.8343  27
   1 -17   5 35.3926 16.2672   7
   1 -17   5 76.0831 24.8048  25
   1 -17   6-21.1802 24.5296  25
   1 -17   6-9.02682 17.7736  27
   1 -17   6 3.49460 14.9011   7
   1 -17   7 19.0178 16.0294   7
   1 -17   7 33.8800 19.3402  27
   1 -17   7 15.1343 25.0985  25
   1 -17   8-1.12767 14.9782   7
   1 -17   8-14.6714 24.9192  25
   1 -17   8-7.56447 18.0191  27
   1 -17   9 23.1573 15.5641   7
   1 -17   9 25.3750 18.2363  27
   1 -17  10 1.78331 16.3491  27
   1 -17  10 0.50534 13.0540   7
   1 -17  11-1.29723 19.5818  25
   1 -17  11-0.46202 13.0745   7
   1 -17  11-12.4089 13.1731   8
   1 -17  12 38.3203 13.6462   7
   1 -17  12 16.6129 12.7998   8
   1 -17  12 19.1603 18.3107  25
   1 -17  13-1.39513 15.2345  25
   1 -17  13 4.04994 11.1684   7
   1 -17  13-4.43934 11.9532   8
   1 -17  14-7.77090 12.2789  25
   1 -17  14 3.65861 9.50562   7
   1 -17  14-12.7303 10.3675   8
  -1  16  23-14.9172 5.52066  29
   1 -16 -23 7.00566 6.18302  31
   1 -16 -22 188.036 17.2761  31
  -1  16  22 160.309 15.9732  29
  -1  16  22 218.538 18.1418  13
   1 -16 -21 63.4060 12.6783  31
  -1  16  21 77.5569 13.2579  13
  -1  16  21 76.9513 13.4139  35
  -1  16  21 65.5776 11.4761  29
  -1  16  20 7.53098 10.7528  29
  -1  16  20-11.6499 12.7808  35
  -1  16  20 7.19064 11.9460  13
   1 -16 -20 23.2302 11.6789  31
   1 -16 -19 12.8306 12.5898  31
  -1  16  19 22.3949 8.70298  12
  -1  16  19 9.96949 12.7039  13
  -1  16  19 12.9346 12.3648  29
  -1  16  19 16.5065 13.4813  35
  -1  16  18 15.2533 9.37582  12
  -1  16  18-0.43319 13.7415  35
  -1  16  18 5.21480 12.9907  29
   1 -16 -18-13.4938 14.1643  31
  -1  16  18-1.71060 12.9207  13
   1 -16 -17 74.7213 16.6607  31
  -1  16  17 92.2441 16.6926  29
  -1  16  17 113.412 13.5645  12
  -1  16  17 82.3020 16.8437  35
  -1  16  17 100.103 17.1905  13
  -1  16  16-2.34076 14.5951  35
  -1  16  16 34.9128 11.2339  12
  -1  16  16 5.44190 14.2651  29
  -1  16  16 11.4362 13.7718  13
   1 -16 -16-6.90856 14.7210  31
  -1  16  15 30.8551 14.6324  13
  -1  16  15 48.0655 16.3006  29
  -1  16  15 53.2408 12.3119  12
   1 -16 -15 29.6955 14.3721  31
  -1  16  15 41.7166 14.3668  35
  -1  16  14 80.2718 13.2863  12
  -1  16  14 34.5651 14.9539  35
  -1  16  14 57.6298 15.4544  13
   1 -16 -14 31.8905 15.3066  31
  -1  16  14 57.3390 16.8083  29
  -1  16  13 103.229 17.9984  29
  -1  16  13 86.1059 16.6814  35
   1 -16 -13 93.4015 17.1337  31
  -1  16  13 78.7113 16.0315  13
  -1  16  13 121.523 14.9297  12
   1 -16 -12 146.389 20.3451  31
  -1  16  12 154.545 19.6836  13
  -1  16  12 146.217 19.5637  35
  -1  16  12 184.968 20.7246  29
  -1  16  12 199.356 18.5621  12
   1 -16 -11 3.94626 12.7231  31
  -1  16  11 16.2250 11.1892  12
  -1  16  11 2.55468 12.5375  13
  -1  16  11 2.42022 13.6643  29
  -1  16  10 256.204 25.2858  29
  -1  16  10 270.982 24.0691  12
  -1  16  10 254.953 24.5074  13
   1 -16 -10 266.589 25.5505  31
  -1  16   9 45.7413 12.0367  12
  -1  16   9 14.4877 13.4118  29
   1 -16  -9 26.7804 13.5444  31
  -1  16   9 10.7455 12.6240  13
   1 -16  -8 8.02351 11.9784  31
  -1  16   8-0.38445 11.9365  13
   1 -16  -8 5.26820 13.3093  25
  -1  16   8 1.40575 10.6442  12
   1 -16  -7 562.729 50.4756  25
  -1  16   7 738.201 49.2791  12
  -1  16   7 656.859 49.1148  13
   1 -16  -6 12.2049 14.8126  25
   1 -16  -6 2.72345 13.3157  27
  -1  16   6-29.5913 14.4665  29
  -1  16   6-7.91772 11.1860  13
  -1  16   6 6.34665 11.2615  12
   1 -16  -5 51.3496 13.1893  16
  -1  16   5 35.8066 12.3252  12
   1 -16  -5 41.5015 15.6212  25
   1 -16  -5 45.7394 14.3510  27
  -1  16   5 59.1291 11.9490  13
  -1  16   5 8.86132 12.7349  29
  -1  16   4 207.168 22.6567  12
   1 -16  -4 233.508 26.5192  25
  -1  16   4 255.405 22.3254  13
   1 -16  -4 302.026 25.2141  27
   1 -16  -4 234.137 23.5209  16
  -1  16   3 201.291 21.5290  12
  -1  16   3 242.329 20.7593  13
   1 -16  -3 211.353 22.6687  27
   1 -16  -3 220.947 22.2246  16
   1 -16  -3 223.843 26.1849  25
   1 -16  -2 145.934 18.7039  27
   1 -16  -2 123.067 21.9962  25
  -1  16   2 133.203 16.7367  12
   1 -16  -2 155.917 18.1091  16
   1 -16  -1 40.9861 17.4302  25
  -1  16   1 10.5469 11.5040  12
  -1  16   1 29.4726 9.84910  15
   1 -16  -1 29.1894 14.6606  27
   1 -16  -1 35.7247 13.0640  16
   1 -16   0 24.8885 12.7044  16
  -1  16   0-10.7552 12.0958  12
  -1  16   0 16.4309 9.54248  15
   1 -16   0 35.5933 14.3505  27
   1 -16   0 22.0674 18.6381  25
   1 -16   1 90.8846 21.7381  25
   1 -16   1 92.6529 15.8191  16
   1 -16   1 80.0832 16.6373  27
  -1  16  -1 62.8894 12.0401  15
   1 -16   2 2.71132 14.6096   7
   1 -16   2-0.89968 13.1379  16
  -1  16  -2-13.2158 9.87936  15
   1 -16   2 8.54811 14.8848  27
   1 -16   2 3.01334 19.3759  25
   1 -16   3 131.612 19.7991  27
   1 -16   3 103.178 16.8914  16
   1 -16   3 96.3191 24.3460  25
   1 -16   3 113.500 18.5862   7
  -1  16  -3 71.6219 13.4838  15
   1 -16   4-2.09409 15.8277  27
   1 -16   4 4.06173 14.3006   7
   1 -16   4-11.4466 22.6156  25
   1 -16   4 0.47069 13.5789  16
   1 -16   5-11.3344 15.0699   7
   1 -16   5 4.25612 16.2261  27
   1 -16   5 2.52183 21.8807  25
   1 -16   6 14.5961 15.9544   7
   1 -16   6 1.61036 17.3613  27
   1 -16   6-1.72241 22.8269  25
   1 -16   7 44.4680 18.8695  27
   1 -16   7 38.9564 24.8723  25
   1 -16   7 36.2831 16.8566   7
   1 -16   8 46.7372 17.8751   7
   1 -16   8 41.2654 19.6636  27
   1 -16   9-8.23462 18.6273  27
   1 -16   9 12.0646 15.3956   7
   1 -16  10-8.16693 15.3830   7
   1 -16  10 27.9849 18.7918  27
   1 -16  11 44.1587 24.6887  25
   1 -16  11 44.8642 16.3705   7
   1 -16  11 47.7268 17.5625  27
   1 -16  12-3.30562 19.4049  25
   1 -16  12 5.53397 13.8764   7
   1 -16  12-8.26395 13.6314   8
   1 -16  13 4.46983 13.2523   7
   1 -16  13-4.56414 17.9374  25
   1 -16  13 1.36403 12.4683   8
   1 -16  14-4.93285 11.9434   7
   1 -16  14 8.86343 12.0398   8
   1 -16  14-23.2966 15.2257  25
   1 -16  15-3.71626 10.3173   8
   1 -16  15 13.4382 10.5275   7
   1 -16  15-3.81249 11.3395  25
   1 -15 -23 7.97122 7.83119  31
  -1  15  23 1.24033 8.82428  35
  -1  15  23-12.6530 6.66717  29
  -1  15  22 296.394 23.2451  29
   1 -15 -22 297.305 24.6917  31
  -1  15  22 273.125 24.7050  35
  -1  15  21-1.52576 9.99330  29
  -1  15  21-18.4053 12.7871  35
   1 -15 -21-6.03673 11.1881  31
  -1  15  21-0.34781 11.5474  13
   1 -15 -20 41.8404 13.6477  31
  -1  15  20 58.8007 12.6186  29
  -1  15  20 37.4838 13.7546  13
  -1  15  20 38.6144 14.3713  35
   1 -15 -19 90.3980 16.5534  31
  -1  15  19 118.765 15.8388  29
  -1  15  19 103.195 17.1443  35
  -1  15  19 98.6299 12.7563  12
  -1  15  19 74.4749 16.7487  13
  -1  15  18 43.9466 15.1631  35
  -1  15  18 25.1580 14.7842  13
  -1  15  18 50.7227 11.1666  12
  -1  15  18 33.5683 10.4591  15
   1 -15 -18 39.7055 14.5791  31
  -1  15  18 74.4161 14.8371  29
  -1  15  17 292.344 25.5428  15
  -1  15  17 314.499 26.1253  12
   1 -15 -17 313.635 29.8173  31
  -1  15  17 319.129 28.9712  13
  -1  15  17 304.520 29.1846  35
  -1  15  17 357.883 28.9546  29
  -1  15  16 56.3018 11.5266  15
  -1  15  16 69.4604 16.4126  29
  -1  15  16 47.7056 15.2909  35
  -1  15  16 78.6473 12.8511  12
   1 -15 -16 47.3908 15.5897  31
  -1  15  16 41.0532 15.2335  13
   1 -15 -15 6.15043 14.4028  31
  -1  15  15 2.40909 14.6024  35
  -1  15  15 32.2573 11.6850  12
  -1  15  15 8.18612 9.94160  15
  -1  15  15 24.6316 15.6666  29
  -1  15  15-0.47471 13.6844  13
  -1  15  14 1747.44 122.314  13
  -1  15  14 1752.52 122.419  35
  -1  15  14 2085.86 122.398  29
  -1  15  14 1573.94 119.845  15
  -1  15  14 1807.59 120.902  12
   1 -15 -14 1664.03 122.521  31
  -1  15  13 48.7653 11.7009  15
   1 -15 -13 42.1261 14.9512  31
  -1  15  13 51.8860 14.8027  35
  -1  15  13 55.6773 13.1774  12
  -1  15  13 42.1666 14.2789  13
  -1  15  13 87.1914 16.4522  29
  -1  15  12 460.721 39.3779  35
  -1  15  12 485.614 39.2977  13
   1 -15 -12 460.861 39.7361  31
  -1  15  12 547.929 40.0512  29
  -1  15  12 523.396 38.5019  12
  -1  15  11 193.700 20.6068  29
  -1  15  11 145.508 19.2337  35
   1 -15 -11 174.780 20.4078  31
  -1  15  11 219.827 19.3217  12
  -1  15  11 164.736 19.8398  13
  -1  15  10 22.9952 11.8941  13
  -1  15  10 23.1246 11.2287  12
   1 -15 -10-5.61103 12.6778  31
  -1  15  10 26.3536 12.7282  29
  -1  15  10 2.54726 10.8944  35
   1 -15  -9 315.010 28.4352  31
  -1  15   9 263.392 26.8875  35
  -1  15   9 346.602 27.2466  12
  -1  15   9 328.136 27.3867  13
  -1  15   9 321.399 27.7459  29
  -1  15   8 148.787 17.9556  13
   1 -15  -8 176.304 19.5668  31
  -1  15   8 190.310 18.4800  12
   1 -15  -7 325.673 31.4817  25
  -1  15   7 352.721 30.0764  13
   1 -15  -7 361.653 30.8617  31
  -1  15   7 411.156 30.1294  12
   1 -15  -6 127.698 18.8971  24
  -1  15   6 184.013 18.5734  13
   1 -15  -6 178.463 20.7173  25
   1 -15  -6 191.166 19.5200  31
  -1  15   6 196.382 18.7296  12
   1 -15  -5 50.3853 14.0614  24
   1 -15  -5 71.1862 15.1971  25
  -1  15   5 63.2362 12.0628  13
  -1  15   5 32.2233 12.3624  29
  -1  15   5 46.0685 11.9868  12
   1 -15  -5 58.2039 13.1593  27
   1 -15  -4 748.704 55.5944  25
   1 -15  -4 731.155 53.6493  27
  -1  15   4 628.953 52.2428  29
  -1  15   4 771.855 52.9742  12
   1 -15  -4 741.222 52.9710  16
  -1  15   4 722.389 52.4779  13
   1 -15  -3 16.8368 14.9916  25
   1 -15  -3 16.9493 11.8121  27
   1 -15  -3 12.4699 11.1333  16
  -1  15   3 2.33180 10.0222  12
  -1  15   3 2.82950 9.31466  13
  -1  15   2 317.353 26.7280  13
   1 -15  -2 353.229 28.4409  16
  -1  15   2 330.379 26.4020  15
   1 -15  -2 330.097 31.6537  25
  -1  15   2 310.518 27.7324  12
   1 -15  -2 359.040 29.3202  27
   1 -15  -1 68.3341 18.1820  25
   1 -15  -1 87.7669 14.5823  16
   1 -15  -1 96.6917 15.8910  27
  -1  15   1 96.8344 12.4331  15
  -1  15   1 112.369 14.0225  12
  -1  15   0 82.6852 11.6540  15
  -1  15   0 54.2583 12.3101  12
   1 -15   0 78.8722 15.1599  27
   1 -15   0 71.4410 14.0115  16
   1 -15   0 75.3544 19.1101  25
  -1  15  -1 346.480 26.5240  15
   1 -15   1 361.780 30.0504  27
  -1  15  -1 247.870 26.8974  12
   1 -15   1 357.529 34.0844  25
   1 -15   1 340.628 28.7606  16
   1 -15   2 45.1846 13.3773  16
  -1  15  -2 20.6524 10.6842  15
   1 -15   2 49.3974 14.3357  27
   1 -15   2 44.7700 14.8814   7
   1 -15   2 32.4416 19.5259  25
   1 -15   3 27.5877 19.9545  25
  -1  15  -3 12.7682 10.5254  15
   1 -15   3 39.6566 13.9731  16
   1 -15   3 56.7172 15.3695  27
   1 -15   3 63.0913 16.5126   7
   1 -15   4 4.98651 14.1784  27
  -1  15  -4-16.7526 10.7361  15
   1 -15   4-4.68003 20.1109  25
   1 -15   4-3.97632 14.0760   7
   1 -15   4-4.04996 12.9461  16
   1 -15   5 3.07491 14.8075  27
   1 -15   5-13.9024 13.6582  16
   1 -15   5-29.2152 22.4324  25
   1 -15   5 1.18274 15.2521   7
   1 -15   6 20.2212 15.3578   7
   1 -15   6-8.43301 21.9763  25
   1 -15   6-3.14809 15.7902  27
   1 -15   7 45.9537 17.1561   7
   1 -15   7 75.7404 18.3723  27
   1 -15   7 62.8869 25.3229  25
   1 -15   8-1.07151 17.4202  27
   1 -15   8 6.41634 16.0223   7
   1 -15   9 11.7088 18.4145  27
   1 -15   9 33.4643 17.0196   7
   1 -15  10-1.27561 15.4804   7
   1 -15  10-16.1282 17.8444  27
   1 -15  11 30.3888 25.1253  25
   1 -15  11 23.4076 16.0530   7
   1 -15  11 25.4061 18.1670  27
   1 -15  12-26.7168 15.0256   8
   1 -15  12 7.60253 15.3423   7
   1 -15  12 22.9371 23.9442  25
   1 -15  13-4.75775 12.9983   8
   1 -15  13 3.23825 14.9437   7
   1 -15  13-7.26686 20.6478  25
   1 -15  14 12.9917 18.4066  25
   1 -15  14 1.90574 13.6157   7
   1 -15  14 4.18664 13.1028   8
   1 -15  15 17.0677 12.7676   7
   1 -15  15 19.6868 12.3296   8
   1 -15  15 28.5966 15.2047  25
   1 -15  16 36.8158 11.8903   7
   1 -15  16 26.0982 11.5372  25
   1 -15  16 28.4682 9.75337  11
   1 -15  16 42.3382 11.6279   8
   1 -14 -24 17.4497 6.85820  31
  -1  14  24 7.11682 7.31690  13
   1 -14 -23 143.632 14.9319  31
  -1  14  23 129.643 12.7605  29
   1 -14 -22-0.99587 10.8235  31
  -1  14  22 4.02197 8.92721  29
   1 -14 -21 20.6614 12.0250  31
  -1  14  21 42.7074 11.2326  29
  -1  14  21 26.9687 8.69525  15
  -1  14  20 80.3939 15.9377  13
  -1  14  20 109.323 14.6619  29
  -1  14  20 86.2268 16.3594  35
   1 -14 -20 81.9255 16.0085  31
  -1  14  20 75.1223 11.7449  15
  -1  14  19-7.55335 9.93098  15
  -1  14  19-8.57349 14.5445  35
  -1  14  19 24.8904 12.9173  29
   1 -14 -19-9.49880 14.0515  31
  -1  14  19-8.93357 10.0320  12
  -1  14  19-22.3373 14.1786  13
  -1  14  18 110.522 17.6308  13
  -1  14  18 78.4417 17.6108  35
  -1  14  18 98.8828 13.9946  12
  -1  14  18 87.6926 14.1006  15
  -1  14  18 127.008 17.4848  29
  -1  14  17 6.83267 10.5995  15
  -1  14  17-1.59652 10.9394  12
  -1  14  17 34.9738 15.1560  29
  -1  14  17 5.85523 13.5399  13
  -1  14  17-10.1574 14.2611  35
  -1  14  16-1.95020 13.8821  13
  -1  14  16-5.63429 10.5467  15
  -1  14  16 8.61961 11.2133  12
  -1  14  16 24.1384 14.6624  29
  -1  14  16 5.34136 13.8259  35
  -1  14  15 606.512 45.0023  12
  -1  14  15 622.685 47.5294  35
  -1  14  15 615.920 47.4220  13
  -1  14  15 504.219 44.2200  15
   1 -14 -14 69.6354 16.2250  31
  -1  14  14 107.674 17.2084  35
  -1  14  14 81.7719 13.5298  15
  -1  14  14 86.1126 16.5980  13
  -1  14  14 83.2916 14.2892  12
   1 -14 -13 480.010 42.2508  31
  -1  14  13 486.246 41.7720  13
  -1  14  13 593.039 40.8186  12
  -1  14  13 504.145 41.8606  35
  -1  14  13 485.830 39.8612  15
  -1  14  12 315.660 24.8139  12
  -1  14  12 344.466 26.1651  29
  -1  14  12 258.160 25.6792  35
  -1  14  12 271.477 23.7479  15
  -1  14  12 249.312 25.2153  13
   1 -14 -12 240.297 25.7099  31
  -1  14  11 110.082 14.7322  12
  -1  14  11 93.7981 15.0293  35
  -1  14  11 134.765 16.2318  29
  -1  14  11 101.481 13.3773  15
   1 -14 -11 74.9658 15.9059  31
  -1  14  11 97.9658 15.7459  13
   1 -14 -10 196.227 22.2602  31
  -1  14  10 229.843 22.3798  13
  -1  14  10 226.542 20.1592  15
  -1  14  10 195.282 21.8109  35
  -1  14  10 269.740 22.6249  29
  -1  14  10 258.732 21.6826  12
  -1  14   9-19.8719 12.7304  35
  -1  14   9 2.79042 10.4102  12
   1 -14  -9 0.43204 11.4621  31
  -1  14   9 0.37284 11.3266  13
  -1  14   8 985.591 71.3315  29
  -1  14   8 1062.34 72.0044  13
  -1  14   8 1132.76 71.4460  12
  -1  14   8 914.370 71.2923  35
   1 -14  -8 942.606 71.9442  31
   1 -14  -7 441.791 36.0622  31
   1 -14  -7 401.958 36.2992  25
  -1  14   7 510.617 35.3296  12
  -1  14   7 451.101 35.3567  13
   1 -14  -6 38.4485 13.3529  25
   1 -14  -6 31.9000 11.2818  31
  -1  14   6 50.0193 11.3144  13
   1 -14  -6 30.4933 11.5515  24
  -1  14   6 68.1604 11.6462  12
  -1  14   5 1343.77 90.5483  29
  -1  14   5 1498.10 90.8551  13
   1 -14  -5 1275.09 92.1834  25
   1 -14  -5 1461.79 91.6801  31
  -1  14   4 6.84469 9.32334  12
   1 -14  -4 13.5428 10.7018  27
  -1  14   4-3.69236 10.1142  29
  -1  14   4 15.6187 9.74193  13
   1 -14  -4 12.2389 11.7332  24
   1 -14  -4 22.5821 12.9309  25
   1 -14  -3 27.5135 12.4678  24
  -1  14   3 61.6191 10.6432  13
   1 -14  -3 31.0640 14.2549  25
   1 -14  -3 51.5301 11.2192  16
   1 -14  -3 64.3694 12.1066  27
  -1  14   3 37.1315 10.5202  12
  -1  14   3 22.5895 9.76937  29
   1 -14  -2 44.0529 14.2892  25
  -1  14   2 48.5335 10.1304  15
   1 -14  -2 58.1410 12.1630  16
   1 -14  -2 64.1889 12.3726  27
  -1  14   2 36.5108 10.7387  12
  -1  14   2 54.3726 10.3372  13
   1 -14  -1-6.06689 10.2069  16
   1 -14  -1-0.55526 13.5541  25
   1 -14  -1-3.97661 10.7574  27
  -1  14   1-10.0653 9.48130  12
  -1  14   1 4.07559 7.77121  15
  -1  14   0 338.572 25.2095  15
   1 -14   0 322.727 27.3253  27
   1 -14   0 333.556 26.9735  16
  -1  14   0 277.836 25.7595  12
   1 -14   0 274.565 30.0986  25
  -1  14  -1 64.5948 10.5056  15
   1 -14   1 52.3933 13.0630  27
  -1  14  -1 42.2685 10.9832  12
   1 -14   1 51.0279 17.0099  25
   1 -14   1 63.3036 12.9795  16
   1 -14   2 56.1283 12.7334  16
  -1  14  -2 15.7518 9.97911  12
   1 -14   2 50.3676 17.7743  25
   1 -14   2 43.2559 13.1890  27
  -1  14  -2 52.1190 10.0682  15
   1 -14   3 566.518 41.3155  27
  -1  14  -3 472.410 38.1925  15
   1 -14   3 491.443 41.9450   7
   1 -14   3 526.878 40.2968  16
   1 -14   3 538.664 45.2839  25
  -1  14  -4-10.0153 10.6792  15
   1 -14   4 19.5038 14.5865   7
   1 -14   4 23.7124 13.7115  27
   1 -14   4 14.2887 12.3323  16
   1 -14   4 1.45530 19.3886  25
   1 -14   5 5.69592 14.7024   7
   1 -14   5 16.3869 14.0526  27
   1 -14   5 39.2535 20.1899  25
   1 -14   5 13.5553 12.8550  16
   1 -14   6-4.78289 15.1536   7
   1 -14   6-14.4692 20.9354  25
   1 -14   6-14.4841 14.6769  27
   1 -14   7 6.66209 21.6258  25
   1 -14   7 59.2223 17.6022   7
   1 -14   7 48.4116 16.5539  27
   1 -14   8 160.270 22.1186  27
   1 -14   8 148.584 22.7162   7
   1 -14   9 23.1209 16.5887   7
   1 -14   9-0.53280 16.9647  27
   1 -14  10 91.3889 28.0834  25
   1 -14  10 129.279 22.2944  27
   1 -14  10 109.669 21.2238   7
   1 -14  11 30.8098 19.0698  27
   1 -14  11 25.1933 25.3076  25
   1 -14  11 33.0986 18.1602   7
   1 -14  12-1.93579 15.8651   7
   1 -14  12-1.58913 22.9829  25
   1 -14  13 28.8899 17.1771   7
   1 -14  13 2.34990 15.4093   8
   1 -14  13 51.9540 22.6243  25
   1 -14  14 17.4339 16.6182   7
   1 -14  14 0.53428 13.1679   8
   1 -14  14-17.5061 20.0207  25
   1 -14  15 67.8122 18.9737  25
   1 -14  15 58.7178 16.0816   7
   1 -14  15 56.7648 14.5024   8
   1 -14  16 24.0318 14.4523  25
   1 -14  16 7.12109 11.8092   8
   1 -14  16 11.1503 12.7860   7
   1 -14  17 20.6616 9.14457  11
   1 -14  17 2.39762 11.1848   7
   1 -14  17 11.9844 10.4788   8
   1 -13 -24 24.9040 8.33844  31
  -1  13  24 23.3566 8.64354  13
   1 -13 -23 65.0392 12.0356  31
  -1  13  23 53.7878 9.38789  29
  -1  13  23 62.9552 12.1308  13
   1 -13 -22 82.1798 14.3624  31
  -1  13  22 76.0006 11.1302  15
  -1  13  21 5.40410 9.02868  15
  -1  13  21 39.3352 11.0975  29
  -1  13  20 112.474 15.3354  15
  -1  13  20 128.354 14.6574  12
  -1  13  19 7.77224 9.93852  12
  -1  13  19-9.96945 10.9796  15
  -1  13  18 55.3059 15.0498  29
  -1  13  18 23.1584 15.0139  13
  -1  13  18 29.0701 16.0241  35
  -1  13  18 18.2906 11.2809  15
  -1  13  18 16.1881 10.5109  12
  -1  13  17 310.454 27.3927  35
  -1  13  17 279.535 27.0113  13
  -1  13  17 238.522 23.5683  12
  -1  13  17 344.204 26.4024  29
  -1  13  17 224.476 23.6686  15
  -1  13  16-0.67100 11.0764  12
  -1  13  16-5.90835 14.4294  13
  -1  13  16-10.4303 11.2920  15
  -1  13  16 10.6300 14.2205  35
  -1  13  15 532.735 41.0550  12
  -1  13  15 450.646 40.4637  15
  -1  13  15 641.229 43.1609  29
  -1  13  15 578.063 43.3204  35
  -1  13  15 572.667 43.7120  13
  -1  13  14 3.64782 12.9579  35
  -1  13  14-12.8859 13.9810  13
  -1  13  14-4.33381 10.7350  12
  -1  13  14 9.43450 13.3193  29
  -1  13  14-4.33009 10.3021  15
  -1  13  13 128.138 17.9217  13
  -1  13  13 107.599 15.5463  15
  -1  13  13 128.125 16.0314  12
  -1  13  13 130.606 17.6494  35
  -1  13  13 166.007 18.0701  29
  -1  13  12 1166.05 81.5597  35
  -1  13  12 1152.37 80.4367  12
  -1  13  12 1108.16 81.4947  13
  -1  13  12 1029.31 79.7264  15
  -1  13  12 1331.07 81.5564  29
  -1  13  11 6.78203 10.4763  12
  -1  13  11 5.20673 10.7540  35
  -1  13  11-1.17159 9.22429  15
  -1  13  11 38.2772 12.3020  29
  -1  13  11 12.2185 12.1780  13
  -1  13  10 830.224 62.3315  35
  -1  13  10 905.875 62.3811  29
   1 -13 -10 856.075 62.8933  31
  -1  13  10 909.591 61.6328  12
  -1  13  10 873.031 62.6824  13
  -1  13  10 819.922 61.0616  15
   1 -13  -9-2.83551 11.2952  31
  -1  13   9 12.4271 10.4431  35
  -1  13   9 27.1960 10.7139  29
  -1  13   9 16.1869 10.2305  12
  -1  13   9 8.24329 9.00170  15
  -1  13   8 29.0051 10.0373  29
  -1  13   8-11.1805 10.3685  35
   1 -13  -8-7.43683 9.63635  31
  -1  13   8 6.46806 9.90847  12
  -1  13   8 2.03196 9.96646  13
   1 -13  -7 11.7879 9.78534  31
  -1  13   7 1.93548 9.55381  13
  -1  13   7-2.47419 10.3833  12
  -1  13   7-24.1061 11.0031  35
  -1  13   6 277.919 23.3515  13
   1 -13  -6 271.443 23.5366  31
   1 -13  -6 237.287 23.7331  25
  -1  13   6 313.338 23.4091  12
   1 -13  -5 834.447 74.2718  24
  -1  13   5 875.620 83.3179   2
   1 -13  -5 1049.76 75.5805  25
  -1  13   5 1207.46 74.4509  12
   1 -13  -5 1144.31 75.1854  31
  -1  13   5 1111.37 74.1115  29
  -1  13   5 1075.04 74.1929  13
   1 -13  -4 2.24983 16.5984   1
   1 -13  -4 22.5577 11.2032  24
   1 -13  -4 23.5882 10.0633  31
   1 -13  -4 21.0362 11.4723  25
  -1  13   4 24.9862 9.88915  13
  -1  13   4 17.2441 8.89916  29
  -1  13   4 27.5821 9.73209  12
  -1  13   4 22.7606 14.0836   2
  -1  13   3 5.54252 8.56520  13
   1 -13  -3 1.05534 9.37235  27
  -1  13   3-0.80970 9.08644  12
   1 -13  -3-6.87362 10.5141  24
  -1  13   3-12.6275 8.68940  29
   1 -13  -3 11.4308 11.9406  25
  -1  13   3-7.36448 12.4983   2
   1 -13  -2 894.441 64.5913  25
  -1  13   2 941.768 61.3055  15
  -1  13   2 924.503 62.1732  12
   1 -13  -2 914.695 62.2180  16
   1 -13  -2 919.052 62.7052  27
  -1  13   2 895.138 61.6681  13
  -1  13   2 794.408 61.3565  29
   1 -13  -2 689.512 62.5742  24
   1 -13  -1 147.249 16.0350  27
  -1  13   1 153.979 14.2820  15
   1 -13  -1 137.428 15.5533  16
  -1  13   1 122.782 14.8316  12
   1 -13  -1 106.928 18.8710  25
   1 -13   0 29.7570 10.8097  27
  -1  13   0 18.3271 18.3447   1
  -1  13   0 43.9027 8.40421  15
  -1  13   0 15.0675 9.47618  12
   1 -13   0 16.2969 13.1152  25
   1 -13   0 33.7441 10.7070  16
   1 -13   1-7.78421 13.9494  25
   1 -13   1 0.68344 9.72065  16
  -1  13  -1-3.90410 8.45811  12
  -1  13  -1 9.78044 7.53549  15
   1 -13   1 8.33308 9.92430  27
  -1  13  -2 8.92792 7.87272  15
   1 -13   2 11.8865 13.9463  25
   1 -13   2-0.70923 10.2513  16
   1 -13   2 8.62960 10.6121  27
  -1  13  -2-4.66717 9.21284  12
  -1  13  -3 251.773 21.0539  15
   1 -13   3 222.923 22.5916  16
   1 -13   3 298.187 25.7896   7
   1 -13   3 213.858 26.5010  25
   1 -13   3 243.469 23.1629  27
   1 -13   4 197.869 20.0439  27
   1 -13   4 200.257 21.9627   7
   1 -13   4 189.289 24.7322  25
  -1  13  -4 152.904 16.7441  15
   1 -13   4 169.794 19.3798  16
   1 -13   5 253.838 25.0775   7
   1 -13   5 240.771 27.5555  25
   1 -13   5 224.697 22.7326  27
   1 -13   5 213.559 22.3229  16
  -1  13  -5 185.225 19.6394  15
   1 -13   6 38.7238 16.2499   7
   1 -13   6 47.5677 14.5849  27
   1 -13   6 33.9504 13.1982  16
   1 -13   6 39.7689 19.8740  25
   1 -13   7-4.21169 15.0962   7
   1 -13   7-4.37454 13.1755  27
   1 -13   8 165.608 22.6498  27
   1 -13   8 162.327 22.6583   7
   1 -13   9 11.2007 15.6684   7
   1 -13   9 1.55982 17.3261  27
   1 -13  10 27.3725 23.8777  25
   1 -13  10 8.46863 17.7052  27
   1 -13  10 27.0977 16.9876   7
   1 -13  11 23.8523 17.8630  27
   1 -13  11 15.8485 18.1520   7
   1 -13  11 15.3158 24.2325  25
   1 -13  12 11.6241 16.9746   7
   1 -13  12 31.4221 24.7067  25
   1 -13  13 91.5795 20.6336   7
   1 -13  13 58.5837 18.9481   8
   1 -13  13 127.813 26.8468  25
   1 -13  14 18.5425 21.8701  25
   1 -13  14-0.58867 15.0235   8
   1 -13  14-0.63696 15.8125   7
   1 -13  15 19.3562 19.3112  25
   1 -13  15 1.59876 14.3149   8
   1 -13  15-3.49101 15.5809   7
   1 -13  16 46.0327 16.8946  25
   1 -13  16 15.0352 14.9792   7
   1 -13  16 17.7341 13.9879   8
   1 -13  17 23.8633 13.0814  25
   1 -13  17 12.1227 12.0547   8
   1 -13  17 12.5789 10.7819  11
   1 -13  17 15.9116 13.5509   7
   1 -13  18 7.73322 11.4895   7
   1 -13  18 14.9396 8.71234  11
  -1  12  24 35.5775 9.32890  13
  -1  12  24 34.0982 10.8288  35
   1 -12 -24 22.8162 9.42108  31
  -1  12  23 56.2010 12.0152  13
  -1  12  23 49.5108 9.27047  15
  -1  12  23 76.0663 13.8892  35
  -1  12  23 71.5707 9.92917  29
  -1  12  22 14.6674 13.2220  35
  -1  12  22-8.79124 12.1281  13
  -1  12  22 8.37189 9.00910  15
  -1  12  21 403.050 33.6451  13
  -1  12  21 322.951 30.7080  15
  -1  12  20 4.62273 10.0352  12
  -1  12  20 48.6501 12.6253  29
  -1  12  19 12.1047 10.6652  12
  -1  12  19 56.2425 14.8884  29
  -1  12  18 633.261 43.6754  29
  -1  12  18 510.000 41.8205  12
  -1  12  17 56.5860 16.6394  13
  -1  12  17 57.4795 12.8917  12
  -1  12  17 68.8168 15.5773  29
  -1  12  16 428.413 36.4279  12
  -1  12  16 527.402 38.2501  29
  -1  12  16 486.396 39.5860  13
  -1  12  16 464.473 38.8304  35
  -1  12  15 93.3790 17.4952  13
  -1  12  15 119.545 16.9440  29
  -1  12  15 148.319 18.5370  35
  -1  12  15 105.191 14.8647  12
  -1  12  14 355.368 28.6782  35
  -1  12  14 300.842 28.6540  13
  -1  12  14 333.889 28.3477  29
  -1  12  14 297.559 26.6334  12
  -1  12  13 723.275 57.0734  13
  -1  12  13 765.459 55.8493  12
  -1  12  13 799.609 56.6009  29
  -1  12  13 807.765 57.3732  35
  -1  12  12 37.8390 10.9866  15
  -1  12  12 44.3967 13.5073  13
  -1  12  12 73.0546 13.0780  29
  -1  12  12 52.3500 11.6307  12
  -1  12  12 68.9272 12.5405  35
  -1  12  11 1188.55 84.3595  13
  -1  12  11 1233.62 84.3174  35
  -1  12  11 1274.10 83.8797  29
  -1  12  11 1080.60 82.8865  15
  -1  12  11 1231.99 83.3623  12
  -1  12  10 218.466 20.4159  12
  -1  12  10 215.234 19.8809  15
  -1  12  10 225.560 21.9460  13
  -1  12  10 251.571 21.4350  29
  -1  12  10 240.635 21.1646  35
  -1  12   9 25.7605 11.0717  13
  -1  12   9 51.4171 10.7810  29
  -1  12   9 31.9067 9.91451  35
  -1  12   9 18.4389 8.66601  15
  -1  12   9 38.2570 10.3500  12
  -1  12   8 431.358 30.1674  29
  -1  12   8 374.610 30.6035  13
  -1  12   8 352.394 29.1219  15
   1 -12  -8 376.128 30.5673  31
  -1  12   8 364.953 30.1646  35
  -1  12   8 415.430 30.0619  12
   1 -12  -7 128.876 14.9125  31
  -1  12   7 112.098 13.9741  35
  -1  12   7 124.332 24.1323   2
  -1  12   7 130.045 15.1776  13
   1 -12  -7 115.622 20.1088   2
  -1  12   7 158.781 14.7324  12
   1 -12  -6 2780.92 193.277  31
  -1  12   6 2858.29 192.918  13
  -1  12   6 2353.51 203.057   2
   1 -12  -6 2926.45 202.336   1
   1 -12  -6 2398.33 199.144   2
   1 -12  -6 2882.15 204.426   3
  -1  12   6 3158.33 192.727  12
  -1  12   5 150.859 23.2082   2
  -1  12   5 132.116 13.7368  29
   1 -12  -5 107.936 24.6346   3
  -1  12   5 134.764 13.9549  12
   1 -12  -5 91.0790 18.2225   2
   1 -12  -5 120.532 22.4948   1
   1 -12  -4 890.878 71.2757   3
   1 -12  -4 860.887 68.6994   1
  -1  12   4 857.234 59.5361  29
  -1  12   4 746.089 68.2990   2
   1 -12  -3 960.794 77.3558   3
   1 -12  -3 967.628 74.7551   1
   1 -12  -3 1062.21 85.0736   4
  -1  12   3 838.655 73.7090   2
   1 -12  -2 97.5856 12.5811  27
   1 -12  -2 104.743 22.9057   3
   1 -12  -2 116.619 20.7585   1
  -1  12   2 67.9343 16.2405   2
  -1  12   2 91.1271 11.8291  12
   1 -12  -1 10.7012 14.8737   1
  -1  12   1 0.94576 10.2279   2
   1 -12  -1 9.97433 8.67496  27
   1 -12  -1 15.8221 18.1947   3
  -1  12   1 0.99889 8.21092  12
   1 -12   0 345.394 26.0450  27
   1 -12   0 327.544 28.3037  25
  -1  12   0 257.100 35.6614   3
   1 -12   0 334.212 37.2062   3
   1 -12   0 280.679 33.0722   1
  -1  12   0 334.493 25.4625  12
  -1  12   0 242.352 28.9143   2
   1 -12   0 311.236 25.5601  16
   1 -12   1 65.8904 11.8207  16
   1 -12   1 82.0055 11.8796  27
  -1  12  -1 62.9722 10.7987  12
  -1  12  -1 37.0253 17.8003   1
  -1  12  -1 54.8384 22.1137   3
   1 -12   1 95.6716 23.7482   3
  -1  12  -2 80.4111 10.1829  15
   1 -12   2 64.1221 11.8006  16
  -1  12  -2 60.8597 18.7008   1
   1 -12   2 72.6514 15.4666  25
  -1  12  -2 60.3330 10.9347  12
   1 -12   2 75.7587 12.2205  27
  -1  12  -3 3.78087 8.74211  12
   1 -12   3 3.41685 14.1946  25
  -1  12  -3 25.2706 8.11172  15
   1 -12   3 10.3511 9.48293  16
   1 -12   3 10.6841 10.5218  27
  -1  12  -3 19.2170 16.0525   1
   1 -12   4 217.827 20.5942  27
  -1  12  -4 174.417 17.8383  15
   1 -12   4 189.529 24.0022  25
   1 -12   4 245.209 23.4927   7
   1 -12   4 202.587 19.8409  16
   1 -12   5 54.4845 12.8597  27
  -1  12  -5 22.2276 9.22188  15
   1 -12   5 58.4257 15.1327   7
   1 -12   5 48.1570 17.2236  25
   1 -12   5 46.6922 12.1827  16
   1 -12   6 72.4100 13.5482  16
   1 -12   6 71.4874 16.8784   7
   1 -12   6 63.9431 19.2400  25
   1 -12   6 54.8612 14.0173  27
   1 -12   7 17.0731 15.2863   7
   1 -12   7 6.77512 12.6921  27
   1 -12   8 1.89960 14.2099  27
   1 -12   8 6.04798 15.9127   7
   1 -12   9 22.7992 16.3200  27
   1 -12   9 57.4828 17.9736   7
   1 -12   9 25.7906 22.0338  25
   1 -12  10 5.13296 16.4442  27
   1 -12  10 33.2296 23.4205  25
   1 -12  10 0.67010 16.6444   7
   1 -12  11 2.76589 16.5245   7
   1 -12  11-1.68355 23.3080  25
   1 -12  11 9.97131 17.0305  27
   1 -12  12 189.774 27.3475   7
   1 -12  12 255.591 32.2330  25
   1 -12  13 6.30816 18.4107   7
   1 -12  13 0.65361 15.3272   8
   1 -12  13 34.6721 23.5336  25
   1 -12  14 94.7492 24.8643  25
   1 -12  14 94.5770 20.9385   7
   1 -12  15 156.464 23.9700   7
   1 -12  15 144.527 21.1497   8
   1 -12  15 185.814 27.0608  25
   1 -12  16 27.1458 18.1523  25
   1 -12  16 12.6507 13.7760   8
   1 -12  16 20.1735 15.8867   7
   1 -12  17 28.4253 15.4313   7
   1 -12  17 60.1662 12.6263  11
   1 -12  17 35.7241 13.9635   8
   1 -12  18 25.2438 10.3059  11
   1 -12  18 4.45513 13.7549   7
   1 -12  19 2.84966 8.81701  27
   1 -12  19-6.65796 11.8867   7
   1 -12  19-2.59143 7.47608  11
   1 -11 -25 11.5815 6.84861  31
  -1  11  25 1.61429 6.33722  13
  -1  11  25-0.21766 8.05668  35
  -1  11  24 11.4399 8.94211  13
  -1  11  24 4.96463 7.03476  15
  -1  11  24 20.8237 10.5191  35
  -1  11  23 43.3863 10.0484  15
  -1  11  23 38.5737 12.3017  13
  -1  11  23 70.8008 10.0561  29
  -1  11  23 83.4227 14.7794  35
  -1  11  22 48.2184 15.3593  35
  -1  11  22 50.2749 13.6916  13
  -1  11  22 81.0555 11.7072  29
  -1  11  21 251.262 23.9379  35
  -1  11  21 258.940 20.2921  29
  -1  11  21 211.552 22.3110  13
  -1  11  20 43.1348 10.9945  12
  -1  11  20 63.5520 16.9515  35
  -1  11  20 35.0053 15.0925  13
  -1  11  20 70.7422 14.2924  29
  -1  11  19 13.9309 13.2758  29
  -1  11  19-6.28304 10.6157  12
  -1  11  18 252.781 23.2070  29
  -1  11  18 195.715 20.8003  12
  -1  11  17 222.303 21.0737  29
  -1  11  17 154.433 18.6477  12
  -1  11  16 33.1775 11.8355  12
  -1  11  16 96.8452 15.7606  29
  -1  11  15 1.83784 11.9704  29
  -1  11  15-8.53210 10.9564  12
  -1  11  15 29.5142 13.5760  35
  -1  11  14 333.823 27.9106  35
  -1  11  14 305.193 27.0211  29
  -1  11  14 286.793 25.6564  12
  -1  11  13 1561.89 104.823  29
  -1  11  13 1396.30 103.872  12
  -1  11  13 1620.56 105.610  35
  -1  11  12 153.143 16.4537  35
  -1  11  12 148.775 16.2764  29
  -1  11  12 114.723 15.0109  12
  -1  11  11 39.9334 10.8333  35
  -1  11  11 38.8271 10.9175  29
  -1  11  11 17.1269 11.6509  13
  -1  11  11 32.5075 10.2197  12
  -1  11  10 1461.40 105.393  12
  -1  11  10 1592.03 105.979  29
  -1  11  10 1615.49 106.360  35
  -1  11  10 1500.71 106.363  13
  -1  11   9 108.907 12.8752  12
  -1  11   9 106.389 12.4975  35
  -1  11   9 102.827 12.8729  29
  -1  11   9 90.7451 13.0679  13
   1 -11  -8 45.9823 20.2915   3
  -1  11   8 39.4518 9.48164  29
  -1  11   8 40.8757 10.6224  13
   1 -11  -8 19.7559 14.5284   2
  -1  11   8 56.8179 19.3751   2
   1 -11  -8 27.5012 16.7838   6
   1 -11  -8 29.0026 17.6326   1
  -1  11   7 678.401 60.6816   2
   1 -11  -7 660.742 64.6093   4
  -1  11   7 585.306 65.7945   4
   1 -11  -7 664.386 57.0640   6
   1 -11  -7 637.755 58.6256   3
   1 -11  -7 737.319 58.4948   1
   1 -11  -7 681.569 56.4810   2
   1 -11  -6 74.4702 20.2637   3
   1 -11  -6 76.5760 24.7042   4
   1 -11  -6 71.5426 17.4947   2
  -1  11   6 107.596 27.8368   4
   1 -11  -6 92.4742 19.8707   6
  -1  11   6 91.8148 20.3559   2
   1 -11  -6 86.4232 19.7557   1
   1 -11  -5 145.842 30.0997   4
   1 -11  -5 158.250 21.5376   2
   1 -11  -5 174.714 24.5873   1
   1 -11  -5 190.341 25.5575   6
  -1  11   5 151.823 24.2584   2
  -1  11   5 187.508 33.6820   4
   1 -11  -5 198.363 27.5501   3
   1 -11  -4 88.4024 19.2992   1
  -1  11   4 93.6307 18.5505   2
  -1  11   4 91.4988 28.4682   4
   1 -11  -4 80.0240 21.0594   3
   1 -11  -4 102.215 25.4773   4
   1 -11  -4 64.3646 14.5603   2
   1 -11  -4 88.8778 19.8571   6
   1 -11  -3 199.561 25.0761   1
   1 -11  -3 206.381 27.2115   6
   1 -11  -3 256.018 33.8205   4
  -1  11   3 188.195 24.9550   2
   1 -11  -3 195.530 27.9568   3
   1 -11  -2 15.4548 16.6485   6
   1 -11  -2 9.60373 19.0822   4
   1 -11  -2 13.7085 14.0506   1
   1 -11  -2 10.5834 16.6140   3
  -1  11   2 27.6829 12.7144   2
  -1  11   1 111.907 17.2048   2
  -1  11   1 129.927 21.9551   1
  -1  11   1 124.563 29.2822   4
   1 -11  -1 130.432 23.3302   3
   1 -11  -1 114.006 25.9927   4
   1 -11  -1 111.080 19.7566   1
  -1  11   0 1132.42 90.8241   2
  -1  11   0 1252.73 96.2658   3
   1 -11   0 1287.34 96.4456   3
   1 -11   0 1417.29 103.182   4
   1 -11   0 1296.81 93.6242   1
  -1  11   0 1198.65 94.1305   1
  -1  11   0 1255.98 103.067   4
   1 -11   1 20.5956 15.3433   1
  -1  11  -1 20.0256 15.2974   1
  -1  11  -1 19.3504 10.4882   2
  -1  11  -1 32.2139 18.7201   3
   1 -11   1 1.66729 19.1457   4
   1 -11   1 1.13910 16.3827   3
   1 -11   1 5.50783 16.4489   6
  -1  11  -1 43.7940 23.8764   4
  -1  11  -2 400.718 41.4842   3
   1 -11   2 435.940 41.7091   6
   1 -11   2 376.994 38.6908   1
  -1  11  -2 375.943 38.3744   1
  -1  11  -2 390.793 48.2976   4
   1 -11   2 465.357 42.4325   3
   1 -11   2 436.145 31.0371  27
  -1  11  -2 295.455 32.7011   2
   1 -11   2 422.053 46.8411   4
  -1  11  -3 326.633 38.4512   3
   1 -11   3 346.479 30.1712  25
   1 -11   3 349.336 37.4775   6
   1 -11   3 338.936 26.6922  16
  -1  11  -3 300.256 34.2625   1
  -1  11  -3 308.625 25.7008  12
   1 -11   3 278.810 34.2165   1
   1 -11   3 381.026 27.3783  27
   1 -11   3 257.001 35.9453   3
  -1  11  -4 22.4745 7.98835  15
   1 -11   4 22.1179 13.4262   7
   1 -11   4 20.8413 10.1371  16
   1 -11   4 6.58985 9.84758  27
   1 -11   4 9.89162 13.4330  25
  -1  11  -4 28.3865 16.0939   1
   1 -11   5 552.297 41.9750   7
   1 -11   5 550.617 43.3072  25
  -1  11  -5 502.176 37.7724  15
   1 -11   5 530.316 39.0555  16
  -1  11  -6 86.0760 12.6537  15
   1 -11   6 100.300 14.8176  27
   1 -11   6 152.399 18.6510   7
   1 -11   6 111.974 19.8455  25
   1 -11   6 114.890 14.9184  16
   1 -11   7 13.2740 14.1371   7
   1 -11   7 3.32043 10.8249  27
   1 -11   8 5.12498 15.2471   7
   1 -11   8-1.76263 12.3046  27
   1 -11   9 94.4482 17.8146  27
   1 -11   9 127.195 21.1372   7
   1 -11   9 123.338 23.4440  25
   1 -11  10 6.84794 15.6197  27
   1 -11  10 21.3421 20.6251  25
   1 -11  10 23.8878 16.5848   7
   1 -11  11 109.892 20.7778  27
   1 -11  11 87.7691 20.6968   7
   1 -11  11 123.225 24.8505  25
   1 -11  12 51.6570 23.3108  25
   1 -11  12 0.70370 17.1354   7
   1 -11  13 25.9783 22.5104  25
   1 -11  13 13.6578 18.2821   7
   1 -11  14-0.72014 18.5208   7
   1 -11  14 2.34580 21.6905  25
   1 -11  14 1.29972 15.8810   8
   1 -11  15 68.3167 18.0643   8
   1 -11  15 117.631 24.8178  25
   1 -11  15 77.3011 21.8220   7
   1 -11  16 22.4526 17.5618   7
   1 -11  16 12.6682 15.5293   8
   1 -11  16 22.6469 19.0954  25
   1 -11  17-6.19315 13.8888   8
   1 -11  17 0.59711 15.8735   7
   1 -11  17 9.80846 16.0613  25
   1 -11  18 20.5086 15.5410   7
   1 -11  18 16.8734 13.2849   8
   1 -11  18 9.08976 10.9903  11
   1 -11  19 3.64642 9.15287  11
   1 -11  19 8.80027 12.8867   7
   1 -11  20-3.82028 12.2998   7
   1 -11  20 0.21946 8.11346  27
  -1  10  25 2.66182 6.48930  13
  -1  10  25 8.30698 8.71540  35
  -1  10  25-3.12424 5.40491  15
  -1  10  24 261.428 20.0178  35
  -1  10  24 216.988 18.3733  13
  -1  10  23 14.3913 8.02245  29
  -1  10  23-7.15919 10.6876  13
  -1  10  23-0.35332 12.7767  35
  -1  10  22 282.928 26.1522  35
  -1  10  22 278.754 21.7739  29
  -1  10  21 304.885 26.7433  13
  -1  10  21 317.884 24.1450  29
  -1  10  21 337.046 28.3946  35
  -1  10  20-18.2621 10.6790  12
  -1  10  20 18.4269 15.7619  35
  -1  10  20 6.07256 12.1775  29
  -1  10  20-1.91361 14.1266  13
  -1  10  19 303.305 28.4437  35
  -1  10  19 261.765 27.0744  13
  -1  10  19 274.530 25.6565  29
  -1  10  18-4.09564 13.7745  29
  -1  10  17 47.8492 14.2351  29
  -1  10  16 10.3745 12.4587  29
  -1  10  15 315.154 27.4340  29
  -1  10  14 2777.06 190.765  35
  -1  10  14 2816.30 190.066  29
  -1  10  13 88.0031 13.3763  29
  -1  10  13 83.5321 14.0720  35
  -1  10  12 1383.16 96.3026  35
  -1  10  12 1377.69 95.7401  29
  -1  10  11 2122.61 143.336  29
  -1  10  11 2082.80 143.645  35
  -1  10  10 719.243 50.3932  35
  -1  10  10 709.319 50.0983  29
  -1  10  10 665.926 49.5606  12
  -1  10   9 557.782 60.8331   2
   1 -10  -9 557.147 57.0299   2
   1 -10  -9 636.261 64.3292   4
   1 -10  -9 668.850 60.4637   3
  -1  10   9 607.781 67.0740   4
   1 -10  -9 726.668 60.7446   1
  -1  10   9 758.985 49.1153  29
   1 -10  -8-2.21923 14.2229   2
   1 -10  -8 5.36553 15.1206   6
   1 -10  -8 30.5628 16.7243   1
  -1  10   8 21.1364 17.1409   2
   1 -10  -8 20.2779 20.9457   4
   1 -10  -8 26.7886 18.4617   3
  -1  10   8 23.3514 24.4556   4
  -1  10   7 1111.91 92.9239   2
   1 -10  -7 1181.82 88.7626   6
  -1  10   7 1190.27 98.4339   4
   1 -10  -7 1108.50 95.4124   4
   1 -10  -7 1228.03 90.6865   1
   1 -10  -7 1201.22 91.5867   3
   1 -10  -7 1167.57 89.3173   2
   1 -10  -6 3048.37 218.392   2
   1 -10  -6 3227.18 221.128   3
  -1  10   6 2994.13 222.139   2
   1 -10  -6 3144.02 226.260   4
   1 -10  -6 3200.16 219.077   6
  -1  10   6 3121.14 227.963   4
   1 -10  -6 3240.39 219.912   1
   1 -10  -5 105.379 20.2960   1
   1 -10  -5 126.783 19.3040   2
  -1  10   5 120.471 27.9836   4
  -1  10   5 100.486 20.3177   2
   1 -10  -5 114.901 22.3092   3
   1 -10  -5 139.461 20.6655   6
   1 -10  -5 141.236 27.1629   4
   1 -10  -4 3852.74 276.435   2
   1 -10  -4 4314.48 279.216   6
   1 -10  -4 4148.27 278.053   1
   1 -10  -4 4043.59 279.538   3
   1 -10  -4 4295.55 285.999   4
  -1  10   4 3758.13 279.388   2
   1 -10  -3 179.005 23.0253   1
   1 -10  -3 202.466 25.7196   3
  -1  10   3 157.927 22.3978   2
   1 -10  -3 204.716 25.3388   6
   1 -10  -3 158.436 20.3737   2
   1 -10  -3 221.966 30.1958   4
   1 -10  -2 27.9323 16.8735   6
   1 -10  -2 24.9805 17.0656   3
   1 -10  -2 39.5104 20.2680   4
   1 -10  -2 28.4897 13.8460   1
  -1  10   2 28.9413 13.4713   2
   1 -10  -1 170.543 22.5780   1
  -1  10   1 165.612 25.3882   3
  -1  10   1 212.254 32.5309   4
   1 -10  -1 219.979 25.4929   6
  -1  10   1 174.180 21.2242   2
   1 -10  -1 180.787 29.4323   4
   1 -10  -1 205.407 26.2878   3
  -1  10   0 208.427 28.5886   3
   1 -10   0 249.717 31.9974   4
   1 -10   0 226.822 28.0798   3
  -1  10   0 178.540 21.9011   2
  -1  10   0 236.145 34.7350   4
  -1  10   0 202.961 26.3315   1
   1 -10   0 220.441 24.7498   1
   1 -10   1 3208.82 205.916   6
  -1  10  -1 2602.57 200.134   2
   1 -10   1 3175.54 211.838   4
  -1  10  -1 2770.74 210.915   4
  -1  10  -1 2896.37 205.391   3
  -1  10  -1 2912.65 203.547   1
   1 -10   1 3005.49 203.064   1
   1 -10   1 3042.72 205.827   3
  -1  10  -2 402.015 36.5586   2
   1 -10   2 552.361 44.4856   6
  -1  10  -2 498.520 50.3923   4
   1 -10   2 423.329 40.3993   1
   1 -10   2 511.025 49.2126   4
   1 -10   2 488.777 44.0866   3
  -1  10  -2 463.397 41.4474   1
  -1  10  -2 385.408 42.5487   3
  -1  10  -3 10.5988 10.5481   2
  -1  10  -3 12.4140 17.3164   3
   1 -10   3 19.4305 14.6874   1
  -1  10  -3 22.2319 21.9771   4
  -1  10  -3 5.58677 8.10103   2
  -1  10  -3 4.52467 13.7179   1
   1 -10   3 17.5010 20.2659   4
   1 -10   3 1.02784 17.2228   6
   1 -10   3 21.9956 17.8915   3
  -1  10  -4 1345.60 92.6012   1
   1 -10   4 1238.76 92.5926   1
  -1  10  -4 1288.05 101.737   4
  -1  10  -4 1049.55 85.8564   2
  -1  10  -4 974.592 87.0461   2
   1 -10   4 1664.66 96.4376   6
  -1  10  -4 1308.21 95.3755   3
   1 -10   4 1409.83 96.8450   3
   1 -10   5-10.5432 9.44357  27
   1 -10   5 3.90261 17.0783   3
  -1  10  -5 10.3260 17.3708   3
  -1  10  -5-6.20755 7.67770  15
   1 -10   5-1.08456 15.1739   6
  -1  10  -5 0.99712 14.3106   1
   1 -10   5-12.6358 9.92111  16
   1 -10   5 1.04880 15.1053   1
   1 -10   5 3.20615 12.5744  25
  -1  10  -6 504.710 53.3150   1
   1 -10   6 636.564 46.6854  16
   1 -10   6 699.581 47.3945  27
   1 -10   6 766.633 50.0474   7
  -1  10  -6 560.963 45.2760  15
   1 -10   6 687.381 55.9578   6
   1 -10   7 111.854 14.9436  27
   1 -10   7 88.6422 17.6364   7
   1 -10   8 81.6711 20.7855  25
   1 -10   8 135.827 16.3796  27
   1 -10   8 118.282 20.1317   7
   1 -10   9 619.688 51.0653  27
   1 -10   9 731.758 53.6930   7
   1 -10   9 701.795 55.4734  25
   1 -10  10 32.5447 16.9216   7
   1 -10  10 24.3544 14.2444  27
   1 -10  10 17.0254 19.7089  25
   1 -10  11 417.885 40.5479  25
   1 -10  11 392.642 37.1825   7
   1 -10  11 400.783 35.3368  27
   1 -10  12 222.380 29.7675   7
   1 -10  12 285.044 32.6988  25
   1 -10  13 52.7358 22.6007  25
   1 -10  13 12.2307 18.8845   7
   1 -10  14 111.033 21.3271   8
   1 -10  14 136.634 24.4523   7
   1 -10  14 180.378 28.0049  25
   1 -10  15 21.8485 16.5911   8
   1 -10  15-5.99026 21.5332  25
   1 -10  15 2.92011 19.2138   7
   1 -10  16 0.70241 17.0911   7
   1 -10  16 9.79490 15.8591   8
   1 -10  16 18.5540 20.0236  25
   1 -10  17 7.79390 16.9792  25
   1 -10  17 5.63285 14.5563   8
   1 -10  17 5.29331 16.4488   7
   1 -10  18 0.49942 13.5748   8
   1 -10  18-5.85668 14.8142  25
   1 -10  18-1.80528 15.6461   7
   1 -10  18 4.23788 11.0279  11
   1 -10  19 35.8529 11.0276  11
   1 -10  19 8.40183 15.3574   7
   1 -10  20-13.1993 8.66030  11
   1 -10  20 9.98027 13.2832   7
  -1   9  25 19.9029 6.93406  13
  -1   9  25 9.19022 6.50522  15
  -1   9  25 29.9637 9.81131  35
  -1   9  24 83.1708 13.2919  35
  -1   9  24 44.4711 10.6858  13
  -1   9  23 98.7003 11.1488  29
  -1   9  23 105.509 16.2320  35
  -1   9  22 19.7357 12.7278  13
  -1   9  22 21.9049 15.1028  35
  -1   9  22 42.4393 10.7681  29
  -1   9  21 199.121 22.4177  35
  -1   9  21 202.876 18.3054  29
  -1   9  21 198.201 20.6475  13
  -1   9  20 22.5058 16.8303  35
  -1   9  20 50.7651 15.1355  13
  -1   9  20 58.5147 13.0811  29
  -1   9  19 146.803 17.7592  29
   1  -9 -19 118.796 17.2735  21
  -1   9  19 140.538 21.2744  35
  -1   9  18-21.1437 16.6498  35
  -1   9  18-9.35554 12.9364  29
   1  -9 -18 8.61157 11.3359  21
  -1   9  17 50.3482 13.8462  29
  -1   9  17 46.1150 15.4965  35
  -1   9  16 22.4425 12.5445  29
  -1   9  15 1266.75 88.8503  29
  -1   9  14 10.4401 10.9035  29
  -1   9  13 70.3661 12.5388  35
  -1   9  12 13.1468 10.2172  29
  -1   9  12 17.5981 10.8899  35
  -1   9  11 1676.10 114.335  35
  -1   9  11 1649.20 113.818  29
   1  -9 -10 373.970 41.4406   1
  -1   9  10 398.669 48.8775   4
  -1   9  10 393.993 29.5000  29
   1  -9 -10 333.247 40.6000   3
   1  -9 -10 428.625 47.2887   4
   1  -9 -10 353.172 39.1900   2
  -1   9  10 397.892 43.9176   2
  -1   9   9 624.723 60.1175   4
   1  -9  -9 574.080 52.0261   1
   1  -9  -9 543.475 50.3367   2
   1  -9  -9 553.504 51.9673   3
  -1   9   9 489.706 52.9138   2
   1  -9  -9 611.662 57.1782   4
  -1   9   8 1434.79 118.528   4
   1  -9  -8 1531.02 109.142   6
   1  -9  -8 1466.81 117.156   4
  -1   9   8 1397.58 114.386   2
   1  -9  -8 1486.55 111.484   2
   1  -9  -8 1597.68 113.527   3
   1  -9  -8 1511.94 112.151   1
   1  -9  -7 721.968 58.0854   6
   1  -9  -7 719.281 59.3245   2
   1  -9  -7 750.298 60.7801   1
   1  -9  -7 750.953 66.1064   4
  -1   9   7 742.921 67.4711   4
  -1   9   7 727.170 63.3311   2
   1  -9  -7 705.298 61.0834   3
   1  -9  -6 204.175 30.6078   4
   1  -9  -6 196.285 24.3193   2
   1  -9  -6 204.409 27.3012   3
   1  -9  -6 188.091 24.8484   1
  -1   9   6 204.522 26.7238   2
  -1   9   6 202.089 31.7645   4
   1  -9  -6 177.283 23.6322   6
   1  -9  -5 950.764 72.8370   6
   1  -9  -5 991.771 74.6812   3
  -1   9   5 929.844 75.2441   2
  -1   9   5 923.345 80.1751   4
   1  -9  -5 969.256 72.7654   2
   1  -9  -5 945.431 73.1665   1
   1  -9  -5 987.069 79.5199   4
   1  -9  -4 145.372 18.7518   2
   1  -9  -4 131.643 24.5321   4
   1  -9  -4 140.399 20.1647   6
  -1   9   4 142.946 21.4082   2
   1  -9  -4 125.548 19.6156   1
   1  -9  -4 116.502 21.1657   3
  -1   9   3 82.2711 16.8250   2
   1  -9  -3 72.4547 19.7212   4
   1  -9  -3 93.3356 16.3186   1
   1  -9  -3 78.4329 17.9000   6
   1  -9  -3 81.4273 14.9449   2
   1  -9  -3 94.1855 17.9190   3
   1  -9  -2 24.0736 12.3825   1
   1  -9  -2 24.9872 15.5516   3
  -1   9   2 58.1819 14.0292   2
   1  -9  -2 18.6752 10.2353   2
   1  -9  -2 35.8303 18.2042   4
   1  -9  -2 25.8645 14.7079   6
   1  -9  -1 292.328 29.0840   3
   1  -9  -1 278.756 27.0938   1
  -1   9   1 249.239 28.5004   3
  -1   9   1 273.608 26.5153   2
   1  -9  -1 317.097 30.5133   6
  -1   9   1 222.997 32.7487   4
  -1   9   1 257.930 28.0790   1
   1  -9  -1 273.776 33.0330   4
  -1   9   0 251.108 28.5342   3
  -1   9   0 290.514 27.8945   1
  -1   9   0 213.177 24.5401   2
  -1   9   0 292.577 34.9520   4
   1  -9   0 274.594 32.7515   4
   1  -9   0 280.264 26.7639   1
   1  -9   0 268.876 28.8584   3
  -1   9  -1 271.836 29.7004   3
  -1   9  -1 224.363 24.4445   2
  -1   9  -1 250.057 34.1787   4
  -1   9  -1 295.008 28.4342   1
   1  -9   1 299.771 27.7864   1
   1  -9   1 243.117 29.1978   3
   1  -9   1 315.359 34.1736   4
  -1   9  -2 912.438 74.6431   4
  -1   9  -2 741.603 62.3664   2
   1  -9   2 917.521 68.8018   3
   1  -9   2 900.160 66.3294   1
  -1   9  -2 851.624 68.0617   3
   1  -9   2 963.222 74.1147   4
  -1   9  -2 880.333 65.9610   1
  -1   9  -3 32.5659 22.0756   4
   1  -9   3 16.8887 14.2172   1
   1  -9   3 29.0803 18.9687   4
  -1   9  -3 42.3475 14.7657   1
  -1   9  -3 33.7017 9.66415   2
   1  -9   3 24.8926 16.6910   3
  -1   9  -3 33.8962 16.3869   3
  -1   9  -4 1002.74 75.9427   2
  -1   9  -4 1108.65 80.4753   1
  -1   9  -4 969.339 77.4729   2
  -1   9  -4 1139.88 89.6934   4
   1  -9   4 1118.05 81.5090   1
   1  -9   4 1215.10 84.8921   3
  -1   9  -4 1055.10 82.9163   3
  -1   9  -5-3.38311 16.5343   3
   1  -9   5 4.65251 14.4577   1
  -1   9  -5 3.45500 12.4107   1
   1  -9   5 9.18849 16.6673   3
  -1   9  -5 13.7376 11.0306   2
  -1   9  -5 16.1502 8.15631   2
  -1   9  -5 10.0513 19.5321   4
   1  -9   6 7.61188 18.1385   3
  -1   9  -6 6.54035 13.2149   1
   1  -9   6 1.02672 15.0932   1
  -1   9  -6 4.03731 7.24148   2
  -1   9  -6 8.59766 16.4601   3
  -1   9  -6 5.05114 9.55186   2
   1  -9   6-8.23149 9.10166  27
   1  -9   6-1.73888 8.79711  16
   1  -9   7 163.845 16.9872  27
   1  -9   7 171.841 20.2587   7
  -1   9  -7 120.802 22.8281   1
   1  -9   7 158.808 23.4922   6
   1  -9   8 825.433 58.3699   7
   1  -9   8 715.044 58.8395  25
   1  -9   8 740.732 55.4441  27
   1  -9   9 55.9451 16.2469   7
   1  -9   9 39.3207 16.7860  25
   1  -9   9 23.1066 12.2609  27
   1  -9  10 210.698 25.8619  25
   1  -9  10 259.673 24.9449   7
   1  -9  11 7.49301 15.0008   7
   1  -9  11 3.65815 13.3128  27
   1  -9  11 7.93058 18.5051  25
   1  -9  12 85.9805 20.4824   7
   1  -9  12 101.588 22.4599  25
   1  -9  13 180.235 26.3144   7
   1  -9  13 186.037 27.3956  25
   1  -9  14 47.5570 22.0437   7
   1  -9  14 94.4753 19.7464   8
   1  -9  14 112.800 24.6223  25
   1  -9  15 97.6594 20.4973   8
   1  -9  15 95.5869 23.9417   7
   1  -9  15 138.777 25.7083  25
   1  -9  16 83.8110 22.1356  25
   1  -9  16 34.9046 17.1225   8
   1  -9  16 33.0876 20.2082   7
   1  -9  17 2.84293 16.6833   7
   1  -9  17 23.0274 18.0184  25
   1  -9  17 1.19733 14.9747   8
   1  -9  18 3.25059 14.8759  25
   1  -9  18 11.9263 12.5124  11
   1  -9  18 3.27588 15.8584   7
   1  -9  18 2.72791 14.7467   8
   1  -9  19-8.63476 11.2630  11
   1  -9  19-12.3645 16.4076   7
   1  -9  20-36.9644 15.8827   7
   1  -9  20-5.76088 9.66697  11
   1  -9  21 15.1344 12.8879   7
   1  -9  21 7.45455 9.85449  27
  -1   8  25 114.101 12.3642  35
  -1   8  25 56.9751 8.72134  13
  -1   8  24 16.3872 11.4564  35
  -1   8  24 3.74998 8.93313  13
  -1   8  23 51.3392 9.46425  29
  -1   8  23 50.5239 14.6111  35
  -1   8  23 42.2681 11.8244  13
   1  -8 -22 338.635 29.2641  21
  -1   8  22 366.817 28.6223  29
  -1   8  22 322.686 30.1863  13
  -1   8  21-18.7546 16.4713  35
   1  -8 -21 17.6698 11.7850  21
  -1   8  21 15.7604 11.1426  29
  -1   8  21 21.3049 12.8399  13
   1  -8 -20 284.250 26.6371  21
  -1   8  20 322.703 29.9882  35
  -1   8  20 299.261 26.0813  29
  -1   8  19 34.5451 16.6847  35
   1  -8 -19 46.3033 13.4553  21
  -1   8  19 26.4685 13.0585  29
  -1   8  18-24.1291 23.3690   7
  -1   8  18-7.08197 12.8569  29
  -1   8  18-12.7606 15.9412  35
   1  -8 -18-32.0640 13.5566  21
  -1   8  17 55.0592 23.0565   7
   1  -8 -17 18.5305 12.4008  21
  -1   8  17 59.4059 13.5681  29
  -1   8  17 56.3297 15.5598  35
  -1   8  16 643.591 57.8319   7
  -1   8  16 732.215 51.4923  29
  -1   8  16 751.784 52.9072  35
   1  -8 -16 630.125 51.1097  21
   1  -8 -15 1287.46 92.0367  21
  -1   8  15 1366.45 92.3314  29
  -1   8  15 1280.50 97.4221   7
  -1   8  14 393.757 31.3896  29
  -1   8  14 386.678 37.9745   7
  -1   8  13 146.788 22.4950   7
  -1   8  13 140.044 15.9338  29
  -1   8  12 7673.31 515.281  35
  -1   8  12 7728.67 514.778  29
  -1   8  11 565.813 40.0424  29
   1  -8 -11 449.079 50.0065   3
   1  -8 -11 455.473 55.0798   4
  -1   8  11 562.052 40.5449  35
  -1   8  10 66.9697 26.2524   4
  -1   8  10 55.1625 21.5172   2
   1  -8 -10 80.3411 24.8689   4
   1  -8 -10 82.5389 22.3035   1
   1  -8 -10 42.5613 18.3119   2
   1  -8  -9 1579.66 117.059   2
  -1   8   9 1515.75 119.737   2
   1  -8  -9 1559.40 117.267   1
   1  -8  -9 1546.04 121.509   4
  -1   8   9 1628.65 124.552   4
   1  -8  -8 278.871 35.6267   4
  -1   8   8 267.155 33.9026   2
   1  -8  -8 274.014 31.1466   2
   1  -8  -8 282.091 32.1036   1
   1  -8  -8 267.019 31.4389   3
   1  -8  -7 441.294 36.7614   6
   1  -8  -7 424.037 39.1132   2
   1  -8  -7 375.525 42.5206   4
   1  -8  -7 394.911 39.1638   3
   1  -8  -7 401.737 38.7137   1
  -1   8   7 439.541 45.9153   4
  -1   8   7 415.537 41.9371   2
   1  -8  -6 32.5975 16.1579   3
  -1   8   6 30.5481 15.8497   2
   1  -8  -6 19.6445 14.5381   1
   1  -8  -6 46.9343 19.0673   4
   1  -8  -6 54.4952 15.7903   2
  -1   8   6 32.8586 20.7824   4
   1  -8  -6 27.2730 12.8462   6
   1  -8  -5 1007.18 73.9177   1
  -1   8   5 957.572 75.9623   2
  -1   8   5 954.081 79.7718   4
   1  -8  -5 971.329 72.8795   6
   1  -8  -5 964.542 73.1076   2
   1  -8  -5 1008.65 78.9328   4
   1  -8  -5 950.730 74.4674   3
   1  -8  -4 1865.43 136.617   2
   1  -8  -4 1889.73 136.852   1
   1  -8  -4 2054.25 143.005   4
   1  -8  -4 2011.93 138.594   3
   1  -8  -4 2070.70 137.961   6
  -1   8   4 1870.74 138.828   2
  -1   8   3 15.3051 12.6772   2
   1  -8  -3 24.1330 17.2365   4
   1  -8  -3 2.64953 12.4322   6
   1  -8  -3 1.61300 10.6637   2
   1  -8  -3 7.82734 10.8968   1
   1  -8  -3-3.56878 13.5884   3
   1  -8  -2 1075.56 75.3032   2
  -1   8   2 1024.11 76.9632   2
   1  -8  -2 1047.77 77.8615   3
   1  -8  -2 1030.22 76.0082   1
   1  -8  -2 1028.73 81.9733   4
   1  -8  -1 832.817 62.3050   3
  -1   8   1 780.911 66.5281   4
  -1   8   1 763.954 60.0347   2
   1  -8  -1 774.524 60.0971   1
  -1   8   1 817.724 62.3453   3
  -1   8   1 832.419 61.3495   1
   1  -8  -1 872.952 67.1523   4
  -1   8   0 10.4171 12.1629   1
  -1   8   0-0.72528 13.2214   3
  -1   8   0 10.2430 15.9931   4
   1  -8   0 12.6675 11.7934   1
  -1   8   0 13.4677 9.62958   2
   1  -8   0-0.70352 14.0622   3
   1  -8   0 31.0212 16.3126   4
   1  -8   1 2435.49 162.809   3
   1  -8   1 2538.88 167.544   4
   1  -8   1 2397.72 160.525   1
  -1   8  -1 2259.13 162.195   3
  -1   8  -1 2229.15 158.913   2
  -1   8  -1 2258.17 166.618   4
  -1   8  -1 2221.01 160.510   1
   1  -8   2 18.1836 12.6953   1
   1  -8   2 32.8625 15.1944   4
  -1   8  -2 13.2986 18.1213   4
   1  -8   2 28.6208 14.1933   3
  -1   8  -2 36.3445 9.91122   2
  -1   8  -2 47.6484 15.6377   3
  -1   8  -2 27.3489 13.6250   1
  -1   8  -3 3426.49 245.134   4
  -1   8  -3 3402.36 240.113   3
  -1   8  -3 3256.69 235.203   2
  -1   8  -3 3551.74 238.391   1
   1  -8   3 3663.84 246.293   4
   1  -8   3 3633.94 240.803   3
   1  -8   3 3633.16 238.727   1
   1  -8   4 281.902 30.2335   3
  -1   8  -4 219.742 22.3205   2
  -1   8  -4 286.603 30.4198   3
  -1   8  -4 254.697 25.1331   2
  -1   8  -4 267.522 26.6844   1
  -1   8  -4 253.300 34.3167   4
   1  -8   4 254.127 27.5287   1
  -1   8  -5 491.116 39.2110   2
  -1   8  -5 571.961 44.1182   1
  -1   8  -5 493.561 41.2836   2
  -1   8  -5 492.031 46.0412   3
   1  -8   5 509.255 44.8427   1
  -1   8  -5 491.863 51.0084   4
   1  -8   5 514.190 46.8727   3
  -1   8  -6 110.551 21.4396   3
   1  -8   6 113.683 20.6756   1
  -1   8  -6 105.325 25.7914   4
  -1   8  -6 90.5794 15.9721   2
  -1   8  -6 90.6996 18.0143   1
  -1   8  -6 100.064 13.5574   2
   1  -8   6 110.299 22.7206   3
  -1   8  -7 76.2702 17.1858   1
  -1   8  -7 68.5532 24.6940   4
  -1   8  -7 63.7169 13.7271   2
   1  -8   7 44.0499 19.5889   3
   1  -8   7 48.2668 18.4008   1
  -1   8  -7 63.2901 19.8146   3
  -1   8  -7 45.7434 10.3728   2
   1  -8   8 634.288 50.6644  25
   1  -8   8 639.471 47.5948  27
   1  -8   8 652.420 53.6676   6
  -1   8  -8 552.320 53.8226   1
   1  -8   8 722.359 50.4842   7
   1  -8   9 23.7624 11.7519  27
   1  -8   9 28.8089 16.5089  25
   1  -8   9 3.34990 9.86910  23
   1  -8   9 44.5117 15.9826   7
   1  -8  10 40.5235 15.8310   7
   1  -8  10 24.9995 12.0901  27
   1  -8  11 1122.49 75.6946   7
   1  -8  11 893.042 72.0707  27
   1  -8  11 1085.69 76.4453  25
   1  -8  12 52.2950 19.2691  25
   1  -8  12 48.3502 17.5424   7
   1  -8  13 403.050 38.7628   7
   1  -8  13 415.613 39.5961  25
   1  -8  14 63.6482 21.1964  25
   1  -8  14 31.8406 17.3826   8
   1  -8  14 51.8422 20.3998   7
   1  -8  15-19.3881 20.3716  25
   1  -8  15 0.74196 18.7878   7
   1  -8  15 0.64846 16.3649   8
   1  -8  16 320.420 32.3811  25
   1  -8  16 226.623 31.8448   7
   1  -8  16 240.733 28.0008   8
   1  -8  17 2.20573 18.3203   7
   1  -8  17-14.9455 15.8612   8
   1  -8  17 40.5318 17.9762  25
   1  -8  18 0.70394 16.9620   7
   1  -8  18 28.9627 13.7673  11
   1  -8  18 9.31530 14.3903   8
   1  -8  18 22.1330 16.0862  25
   1  -8  19 16.2543 17.0313   7
   1  -8  19 27.0140 11.9147  11
   1  -8  20-17.9068 16.6399   7
   1  -8  20-0.24790 10.4020  11
   1  -8  21 59.2404 10.2610  11
   1  -8  21 68.4792 13.1699  27
   1  -8  21 36.2078 15.8937   7
   1  -8  22 1.52992 12.3851   7
  -1   8 -22-14.9353 10.4396  21
   1  -8  22 5.44083 8.50260  27
  -1   7  25 16.7449 9.30085  35
  -1   7  25 4.19428 6.04598  13
  -1   7  24 3.11718 10.9816  35
  -1   7  24-1.68622 8.53607  13
  -1   7  23 145.631 17.9498  13
   1  -7 -23 172.710 17.6515  21
  -1   7  22 33.4005 15.9626  35
  -1   7  22 31.8343 12.8089  13
   1  -7 -22 15.6966 11.2706  21
  -1   7  22 30.4897 10.0723  29
  -1   7  21 53.5673 12.1753  29
   1  -7 -21 29.9511 13.1114  21
  -1   7  21 56.2834 17.3283  35
  -1   7  20 5.33845 16.2213  35
  -1   7  20 10.2595 11.8426  29
  -1   7  20 2.77662 22.0667   7
   1  -7 -20 13.5127 12.9639  21
   1  -7 -19 24.7669 13.4330  21
  -1   7  19 22.8235 13.1184  29
  -1   7  19 16.3211 16.1172  35
  -1   7  19-2.74815 21.6981   7
  -1   7  18-20.0847 15.6584  35
   1  -7 -18-9.08460 13.2651  21
  -1   7  18 0.74271 11.9424  29
  -1   7  18-3.63482 20.8978   7
  -1   7  17 196.513 22.7389  35
  -1   7  17 222.381 29.1972   7
  -1   7  17 203.872 20.7145  29
   1  -7 -17 175.787 20.4514  21
  -1   7  16 1182.24 79.9024   7
   1  -7 -16 930.170 72.7889  21
  -1   7  16 999.402 72.8590  29
  -1   7  16 1103.10 74.4757  35
  -1   7  15 17.3760 11.9623  35
  -1   7  15-1.03615 10.8267  29
  -1   7  15 23.2478 18.0169   7
   1  -7 -15 0.37171 10.2311  21
   1  -7 -14 163.441 17.7298  21
  -1   7  14 184.579 18.4816  29
  -1   7  14 175.151 19.1195  35
  -1   7  13 1945.77 119.081   7
  -1   7  13 1546.04 113.888  29
   1  -7 -12 1074.61 102.017   4
  -1   7  12 1271.38 86.1370  29
   1  -7 -11 148.147 31.2515   4
   1  -7 -11 178.902 28.8790   2
   1  -7 -10 981.615 78.2679   3
   1  -7 -10 897.880 81.8195   4
  -1   7  10 1020.64 85.2264   4
   1  -7 -10 989.723 79.2654   2
   1  -7  -9 1118.02 91.5274   4
   1  -7  -9 1148.54 88.7466   2
  -1   7   9 1234.90 95.3782   4
   1  -7  -9 1073.13 87.8504   1
  -1   7   8 2204.70 170.113   2
   1  -7  -8 2348.19 171.221   4
   1  -7  -8 2503.28 168.872   2
  -1   7   8 2361.73 173.726   4
  -1   7   7 5.57658 15.8327   2
   1  -7  -7 2.38819 17.6135   4
   1  -7  -7 1.78619 15.1863   2
   1  -7  -7 3.37471 10.3087   6
   1  -7  -7 1.73754 14.5850   1
  -1   7   7-1.34003 19.0223   4
   1  -7  -6 817.184 61.1899   6
  -1   7   6 781.382 67.3852   4
   1  -7  -6 835.845 63.3280   2
   1  -7  -6 809.305 63.5805   1
   1  -7  -6 776.597 67.2280   4
   1  -7  -6 821.833 64.0180   3
  -1   7   6 802.134 65.2317   2
   1  -7  -5 1800.81 131.649   1
   1  -7  -5 1825.37 132.278   3
   1  -7  -5 1912.27 131.978   2
   1  -7  -5 1829.58 135.958   4
  -1   7   5 1891.78 134.293   2
  -1   7   5 1910.90 137.266   4
   1  -7  -5 1895.88 130.563   6
   1  -7  -4 12.1748 11.7584   2
   1  -7  -4 2.39932 12.2292   1
   1  -7  -4 15.4233 12.5149   3
   1  -7  -4 11.1190 10.9315   6
  -1   7   4 12.0412 12.2827   2
   1  -7  -4-1.97855 15.2266   4
   1  -7  -3 94.4474 20.4716   4
  -1   7   3 121.755 18.1598   2
   1  -7  -3 116.586 16.4930   6
   1  -7  -3 92.7432 14.7549   1
   1  -7  -3 94.1367 16.5637   3
   1  -7  -3 96.0297 15.4712   2
   1  -7  -2 1475.74 104.136   1
   1  -7  -2 1502.55 105.658   3
   1  -7  -2 1472.95 103.485   2
  -1   7   2 1481.48 105.185   2
  -1   7   1 201.590 21.3073   2
   1  -7  -1 217.076 19.4969   2
  -1   7   1 184.026 22.9919   3
  -1   7   1 162.099 25.4203   4
   1  -7  -1 215.514 22.8923   3
  -1   7   1 216.747 21.4912   1
   1  -7  -1 213.195 20.6609   1
  -1   7   0 1655.32 122.766   4
  -1   7   0 1689.28 118.861   3
  -1   7   0 1606.41 116.515   2
   1  -7   0 1687.46 117.253   1
  -1   7   0 1660.80 117.587   1
   1  -7   0 1825.94 119.246   3
  -1   7  -1 3013.95 212.663   3
  -1   7  -1 3217.02 217.192   4
  -1   7  -1 3137.91 211.523   1
   1  -7   1 3326.36 213.423   3
   1  -7   1 3157.05 211.332   1
  -1   7  -1 2904.35 209.896   2
   1  -7   2 2628.90 178.462   1
   1  -7   2 2742.22 180.709   3
  -1   7  -2 2460.19 176.540   2
  -1   7  -2 2579.51 180.098   3
  -1   7  -2 2540.47 183.959   4
  -1   7  -2 2714.10 178.727   1
  -1   7  -3 34.8104 16.8790   4
  -1   7  -3 23.9078 9.10258   2
   1  -7   3 37.1631 15.5847   4
   1  -7   3 6.39312 13.0013   3
  -1   7  -3 39.8677 12.4599   1
  -1   7  -3 36.9802 14.4923   3
   1  -7   3 23.8381 12.0350   1
  -1   7  -4 2947.21 204.101   3
  -1   7  -4 2817.75 200.836   2
  -1   7  -4 2818.81 199.141   2
   1  -7   4 3102.05 202.789   1
   1  -7   4 3066.84 204.614   3
  -1   7  -4 2900.86 208.195   4
  -1   7  -4 3035.11 202.106   1
  -1   7  -5 5469.00 362.040   3
  -1   7  -5 5125.06 365.880   4
   1  -7   5 5660.27 362.770   3
  -1   7  -5 5052.02 356.255   2
  -1   7  -5 5041.32 358.134   2
   1  -7   5 5518.97 360.612   1
  -1   7  -5 5566.74 359.745   1
  -1   7  -6 143.396 22.0984   3
   1  -7   6 143.612 23.4320   3
   1  -7   6 115.363 20.3692   1
  -1   7  -6 104.555 17.0576   2
  -1   7  -6 115.003 14.3955   2
  -1   7  -6 164.798 27.6309   4
  -1   7  -6 107.989 19.1821   1
  -1   7  -7 1335.77 103.579   3
  -1   7  -7 1302.63 99.4453   2
  -1   7  -7 1418.67 101.304   1
   1  -7   7 1380.76 102.739   1
  -1   7  -7 1457.69 109.568   4
   1  -7   7 1405.86 105.202   3
  -1   7  -8 58.2678 17.6322   1
   1  -7   8 47.1278 21.4116   3
  -1   7  -8 39.6375 22.7277   4
  -1   7  -8 30.6252 13.1137   2
   1  -7   8 60.0017 19.1171   5
  -1   7  -8 86.3920 21.6050   3
   1  -7   9 39.1928 18.9995   5
   1  -7   9 49.1474 15.1338  25
   1  -7   9 67.5780 15.9931   7
   1  -7   9 53.6655 11.9865  27
  -1   7  -9 44.7038 17.5313   1
   1  -7  10 820.061 64.9961  23
   1  -7  10 928.006 66.6541  27
   1  -7  10 915.330 69.8649  25
   1  -7  11 34.7648 11.5234  23
   1  -7  11 91.9342 17.8945   7
   1  -7  11 79.5323 13.9575  27
   1  -7  11 53.4353 17.7833  25
   1  -7  12 38.9040 17.3256  25
   1  -7  12 59.7351 17.3933   7
   1  -7  13 76.0529 19.6745   7
   1  -7  13 87.4402 19.9502  25
   1  -7  13 54.7524 16.5964   8
   1  -7  14-37.0785 18.3682   7
   1  -7  14-16.5336 19.0913  25
   1  -7  14 10.4683 15.5091   8
   1  -7  15 48.7542 20.1916  25
   1  -7  15 29.5846 18.9170   7
   1  -7  15 43.3550 17.1778   8
   1  -7  16-28.0197 19.2913   7
   1  -7  16 0.64647 15.1394   8
   1  -7  16-2.85663 18.9554  25
   1  -7  17 22.6433 20.1772   7
   1  -7  17 42.6107 18.9044  25
   1  -7  17 5.09265 16.1247   8
   1  -7  18 9.94671 12.9009  11
   1  -7  18 3.69322 16.8810   7
   1  -7  18 0.60799 14.6760   8
   1  -7  18 37.2232 17.0878  25
   1  -7  19-7.24758 12.1929  11
   1  -7  19 6.29707 16.2855   7
   1  -7  20 92.6782 20.7318   7
   1  -7  20 114.746 14.9305  11
   1  -7  21-0.54608 12.9054   7
   1  -7  21 11.2798 9.41537  11
  -1   7 -22 12.1054 11.5681  21
   1  -7  22 22.1129 10.2004  27
   1  -7  22 13.9490 13.2650   7
  -1   6  25 7.14445 5.30130  13
  -1   6  25 18.0600 9.15073  35
  -1   6  24 10.2688 11.0748  35
  -1   6  24 0.67734 8.19354  13
  -1   6  23 122.703 17.6408  35
   1  -6 -23 115.661 14.3356  21
  -1   6  23 90.6487 14.0040  13
   1  -6 -22-12.8002 11.7781  21
  -1   6  22-4.95168 9.40357  29
  -1   6  22-5.51939 15.3158  35
  -1   6  22 7.93050 11.1619  13
  -1   6  21 53.7302 17.3050  35
  -1   6  21 34.5837 11.7244  29
  -1   6  21 39.2601 21.8517   7
   1  -6 -21 12.2904 13.1612  21
  -1   6  20 419.537 33.9107  35
  -1   6  20 329.671 29.5704  29
  -1   6  20 397.187 39.1755   7
   1  -6 -20 340.821 31.1445  21
   1  -6 -19 53.6122 15.5596  21
  -1   6  19 68.8295 18.1232  35
  -1   6  19 64.0582 14.4016  29
  -1   6  19 75.5021 23.5462   7
  -1   6  18 470.735 35.6970  35
   1  -6 -18 356.497 33.4987  21
  -1   6  18 422.958 40.2138   7
  -1   6  18 384.933 32.7055  29
  -1   6  17 6.26495 11.9918  29
  -1   6  17 17.9659 14.3796  35
  -1   6  17 2.50640 15.3627  27
   1  -6 -17 8.10348 12.2405  21
  -1   6  16 17.9479 13.2370  35
  -1   6  16 15.5479 14.2601  27
   1  -6 -16 5.65061 11.0217  21
  -1   6  16 40.6144 12.0435  29
  -1   6  16 42.2219 19.4440   7
  -1   6  15 76.7977 13.9983  35
   1  -6 -15 80.7462 13.2396  21
  -1   6  15 69.5081 15.3141  27
  -1   6  15 91.0293 19.6082   7
  -1   6  15 83.9636 13.2678  29
  -1   6  14 0.32376 9.71061  29
  -1   6  14-9.62897 11.7963  27
   1  -6 -14-2.07558 9.37571  21
  -1   6  14 5.83889 10.0999  35
  -1   6  13 913.260 68.5674  35
  -1   6  13 972.725 68.1712  29
  -1   6  13 993.547 69.1285  27
   1  -6 -13 885.950 67.9233  21
  -1   6  12 497.623 37.1340  18
   1  -6 -12 446.617 52.8739   4
  -1   6  12 484.294 37.2268  29
  -1   6  12 543.310 38.2492  27
   1  -6 -11 249.137 31.1187   3
  -1   6  11 242.804 33.1660   2
   1  -6 -11 212.090 30.0530   2
   1  -6 -11 221.936 34.6853   4
  -1   6  10 3271.88 241.483   2
   1  -6 -10 3463.93 231.424   5
   1  -6 -10 3306.36 239.045   2
   1  -6 -10 3563.37 238.235   3
   1  -6 -10 3198.16 241.534   4
  -1   6   9 154.947 27.3997   4
   1  -6  -9 126.994 25.6354   4
   1  -6  -9 98.2433 21.4426   2
  -1   6   8 2101.24 147.326   4
   1  -6  -8 1918.64 142.352   2
   1  -6  -8 1931.55 144.787   4
   1  -6  -7 372.395 34.5950   2
   1  -6  -7 321.092 35.8456   4
  -1   6   7 316.544 36.8930   4
   1  -6  -7 319.624 28.4984   6
   1  -6  -6 116.117 19.2877   2
  -1   6   6 160.953 24.6096   4
  -1   6   6 114.612 20.9731   2
   1  -6  -6 126.138 22.0552   4
   1  -6  -6 111.788 15.2530   6
   1  -6  -5 2627.51 189.638   1
  -1   6   5 2822.14 192.098   2
   1  -6  -5 2827.30 193.499   4
   1  -6  -5 2787.86 188.138   6
   1  -6  -5 2640.24 189.951   3
   1  -6  -5 2835.45 190.404   2
  -1   6   5 2740.97 194.184   4
   1  -6  -4 727.935 55.1146   2
   1  -6  -4 733.887 55.6361   3
   1  -6  -4 721.828 53.9150   6
   1  -6  -4 692.015 54.7611   1
  -1   6   4 741.415 56.7968   2
   1  -6  -4 724.920 58.9018   4
   1  -6  -3 712.448 56.7029   3
   1  -6  -3 786.700 60.8096   4
  -1   6   3 748.172 57.6781   2
   1  -6  -3 774.024 56.3326   1
   1  -6  -3 772.703 56.4115   2
   1  -6  -2 7149.37 484.303   2
   1  -6  -2 7738.08 489.656   4
  -1   6   2 7015.03 485.501   2
   1  -6  -2 7361.43 485.773   3
   1  -6  -2 7144.52 484.714   1
  -1   6   1 103.977 19.9284   4
   1  -6  -1 111.620 16.5545   3
  -1   6   1 127.296 17.0103   3
  -1   6   1 143.149 16.2123   1
   1  -6  -1 134.829 14.8695   1
  -1   6   1 133.555 16.1130   2
   1  -6  -1 107.188 13.7822   2
  -1   6   0 1089.66 77.3787   1
   1  -6   0 1145.97 78.9159   3
  -1   6   0 1060.72 81.7636   4
   1  -6   0 1123.60 77.0592   1
  -1   6   0 1096.16 78.4166   3
  -1   6   0 1036.65 76.5599   2
  -1   6  -1 503.493 37.8006   2
   1  -6   1 484.137 38.3980   1
  -1   6  -1 501.484 40.3367   3
  -1   6  -1 489.504 44.2945   4
  -1   6  -1 517.249 38.9047   1
   1  -6   1 530.977 40.6160   3
  -1   6  -2 1523.94 107.374   3
  -1   6  -2 1577.64 106.015   1
   1  -6   2 1622.94 107.834   3
  -1   6  -2 1589.26 111.328   4
  -1   6  -2 1440.77 104.305   2
   1  -6   2 1459.07 105.910   1
   1  -6   3 68.3513 15.0177   3
  -1   6  -3 70.8191 19.1657   4
  -1   6  -3 90.9123 11.1295   2
  -1   6  -3 67.4556 12.8966   1
   1  -6   3 63.4894 12.7413   1
  -1   6  -3 85.2302 15.9897   3
  -1   6  -4 198.507 20.5814   1
  -1   6  -4 194.259 19.8018   2
  -1   6  -4 195.423 17.8402   2
   1  -6   4 169.709 20.6121   1
  -1   6  -4 189.866 25.1301   4
  -1   6  -4 183.262 21.8973   3
   1  -6   4 198.667 23.1234   3
   1  -6   5 8904.05 592.979   3
   1  -6   5 8848.55 591.441   1
  -1   6  -5 8809.83 592.560   3
  -1   6  -5 8757.83 590.517   1
  -1   6  -5 8678.73 596.180   4
  -1   6  -5 8766.73 589.883   2
  -1   6  -6 11.9660 17.8924   4
  -1   6  -6 28.5292 15.0471   1
  -1   6  -6 28.7319 16.9107   3
   1  -6   6 33.7169 17.6190   3
  -1   6  -6 25.8063 13.2665   2
   1  -6   6 8.76278 15.8099   1
  -1   6  -7 1282.57 97.5114   2
  -1   6  -7 1384.63 98.5554   1
  -1   6  -7 1366.93 101.304   3
  -1   6  -7 1321.62 105.400   4
   1  -6   7 1345.42 101.947   3
   1  -6   7 1406.67 100.215   1
  -1   6  -8 1386.77 100.075   1
   1  -6   8 1261.58 100.157   5
  -1   6  -8 1318.88 98.8724   2
  -1   6  -8 1382.06 103.202   3
   1  -6   8 1433.05 105.025   3
  -1   6  -8 1388.11 107.546   4
   1  -6   9 120.369 25.5500   3
  -1   6  -9 110.222 20.7940   1
  -1   6  -9 136.468 27.9239   4
  -1   6  -9 122.832 24.6399   3
   1  -6   9 109.683 21.4497   5
  -1   6  -9 125.606 19.7104   2
  -1   6 -10 418.082 43.6878   1
   1  -6  10 519.581 36.9772  27
   1  -6  10 401.935 39.3200  25
   1  -6  10 449.836 35.5301  23
   1  -6  11 90.3508 18.4870  25
   1  -6  11 114.638 18.6869   7
   1  -6  11 76.4709 14.0396  27
   1  -6  11 59.8687 12.2068  23
   1  -6  12 1.61005 10.7263  23
   1  -6  12 15.3601 15.4451  25
   1  -6  12 24.0768 15.5034   7
   1  -6  13 525.230 46.4012   8
   1  -6  13 572.566 43.9524  35
   1  -6  13 670.236 48.7841   7
   1  -6  13 583.281 48.0566  25
   1  -6  14 27.7267 15.7647   8
   1  -6  14 5.31774 11.2434  35
   1  -6  14 33.0139 18.1016   7
   1  -6  14 27.9881 17.0510  25
   1  -6  15 194.393 24.9723   8
   1  -6  15 192.828 26.8802   7
   1  -6  15 202.048 26.9181  25
   1  -6  15 218.053 21.1782  35
   1  -6  16-10.5219 18.8892  25
   1  -6  16-0.85011 11.7204  35
   1  -6  16-14.0547 16.9085   8
   1  -6  16-27.8017 19.5273   7
   1  -6  17 0.64196 14.7127   8
   1  -6  17 18.3053 18.2204  25
   1  -6  17 18.5576 12.0709  35
   1  -6  17 0.77194 15.3981   7
   1  -6  18 228.095 24.7315  25
   1  -6  18 159.077 26.3832   7
   1  -6  18 147.255 18.9513  35
   1  -6  18 222.386 20.9373  11
   1  -6  18 143.814 22.7403   8
   1  -6  19 17.3120 13.2999  11
   1  -6  19 20.6248 18.5828   7
   1  -6  20 25.6638 17.6742   7
   1  -6  20 67.0835 13.5295  11
   1  -6  21 5.94604 10.4708  11
   1  -6  21 8.47117 16.1246   7
   1  -6  22-1.82135 11.3178  27
  -1   6 -22-0.32911 12.2961  21
   1  -6  22 9.31455 15.4437   7
   1  -6  23 40.5024 9.49746  27
  -1   6 -23 8.90270 9.86077  21
   1  -6  23 22.1554 12.6384   7
  -1   5  25 14.3082 9.08887  35
  -1   5  24 45.2371 11.9805  35
  -1   5  24 26.5111 8.38471  13
   1  -5 -24 34.6746 9.65918  21
   1  -5 -23 0.31823 10.8642  21
  -1   5  23-8.15894 13.1125  35
  -1   5  23 11.3993 9.73859  13
  -1   5  22 76.3487 17.0803  35
   1  -5 -22 77.1842 14.4914  21
  -1   5  22 47.7389 20.8444   7
  -1   5  22 57.9321 11.2503  29
   1  -5 -21 92.8051 16.5452  21
  -1   5  21 104.213 18.7708  35
  -1   5  21 90.8594 22.5652   7
  -1   5  21 95.9907 13.9458  29
  -1   5  20 77.4738 18.1556  35
  -1   5  20 38.8471 13.0365  29
  -1   5  20 89.2166 22.2438   7
   1  -5 -20 42.9932 15.0616  21
  -1   5  19 202.213 22.9037  35
  -1   5  19 131.829 18.4070  29
  -1   5  19 183.818 24.1593  27
  -1   5  19 175.464 27.0784   7
   1  -5 -19 143.598 20.3365  21
  -1   5  18 105.272 16.8322  29
   1  -5 -18 118.852 18.6546  21
  -1   5  18 177.919 25.6334   7
  -1   5  18 150.919 20.5568  35
  -1   5  18 129.385 21.4156  27
   1  -5 -17 5.21935 12.5734  21
  -1   5  17 10.0535 12.4134  29
  -1   5  17 44.4586 20.0536   7
  -1   5  17 25.4837 14.9137  35
  -1   5  17-6.45761 15.3006  27
  -1   5  16 440.487 36.7626  35
  -1   5  16 473.168 37.7359  27
   1  -5 -16 421.085 36.0025  21
  -1   5  16 427.944 35.6545  29
  -1   5  15 89.0069 12.7720  29
  -1   5  15 60.2608 14.3642  27
   1  -5 -15 77.2184 13.2096  21
  -1   5  15 84.8282 14.1409  35
  -1   5  15 104.865 19.2820   7
   1  -5 -14 784.150 61.7532  21
  -1   5  14 856.176 61.7373  29
  -1   5  14 853.744 62.4166  35
  -1   5  14 1033.09 66.8082   7
  -1   5  14 892.624 62.9692  27
  -1   5  14 871.945 61.7281  18
  -1   5  13 94.4567 13.3735  35
  -1   5  13 98.9319 12.5450  29
  -1   5  13 127.999 17.8567   7
  -1   5  13 101.436 13.9600  27
  -1   5  13 88.5207 12.4647  18
  -1   5  12 4.18245 7.74224  35
   1  -5 -12 1.81410 20.6821   4
   1  -5 -12 9.35282 18.6218   3
   1  -5 -11 1902.95 137.267   2
   1  -5 -11 1933.94 136.139   3
   1  -5 -11 1698.67 138.931   4
  -1   5  11 1759.65 138.559   2
   1  -5 -10 9.59266 16.1488   3
   1  -5 -10 16.3939 9.56219   5
   1  -5 -10 4.96508 15.0856   2
  -1   5  10-12.8229 19.4109   2
   1  -5 -10 14.3270 17.9178   4
   1  -5  -9 342.795 34.0888   3
   1  -5  -9 292.858 36.6583   4
  -1   5   9 325.841 37.0660   2
   1  -5  -9 327.699 27.5305   5
   1  -5  -9 331.225 35.0382   2
   1  -5  -8 141.869 25.6538   4
  -1   5   8 159.716 25.1224   2
  -1   5   8 105.977 25.1067   4
   1  -5  -8 190.764 23.5401   2
   1  -5  -7 3220.05 210.669   2
  -1   5   7 2959.41 212.564   4
   1  -5  -7 2847.90 210.918   4
  -1   5   6 4367.99 305.319   4
   1  -5  -6 4301.55 303.938   4
   1  -5  -6 4804.56 303.109   2
   1  -5  -6 4319.56 298.590   6
   1  -5  -5 50.0371 10.3456   6
   1  -5  -5 31.7795 14.2337   2
  -1   5   5 23.0204 16.4843   4
   1  -5  -5 27.5038 15.6539   4
   1  -5  -4 9166.11 589.018   2
   1  -5  -4 9323.98 587.229   6
  -1   5   4 7606.81 589.060   2
   1  -5  -4 8791.35 591.110   4
   1  -5  -3 36.2196 13.0494   2
   1  -5  -3 39.5623 15.2352   4
  -1   5   3 40.6577 14.0609   2
   1  -5  -3 32.1861 11.7950   3
   1  -5  -3 41.5015 11.0961   1
  -1   5   2 890.632 66.0487   2
   1  -5  -2 876.530 64.9528   2
   1  -5  -2 882.714 65.1108   1
   1  -5  -2 1038.59 69.7468   4
   1  -5  -2 935.491 66.1782   3
   1  -5  -1 1241.18 87.6997   2
   1  -5  -1 1274.60 88.2411   1
   1  -5  -1 1403.76 92.8934   4
  -1   5   1 1245.75 88.5636   1
   1  -5  -1 1278.60 89.4776   3
  -1   5   1 1148.54 88.8487   3
  -1   5   1 1377.82 89.0677   2
   1  -5   0 188.922 16.6564   1
   1  -5   0 208.022 22.1528   4
   1  -5   0 177.824 18.3810   3
  -1   5   0 159.974 18.5240   3
  -1   5   0 176.288 17.3990   1
  -1   5   0 177.596 16.7894   2
  -1   5   0 188.659 21.7739   4
   1  -5   0 170.058 15.7838   2
   1  -5   1 826.792 59.2399   1
  -1   5  -1 803.833 60.5067   3
  -1   5  -1 848.109 58.3240   2
  -1   5  -1 825.539 59.2318   1
   1  -5   1 847.322 60.5744   3
  -1   5  -1 835.357 63.6691   4
  -1   5  -2 12.8198 13.2725   4
  -1   5  -2 13.3578 7.99572   2
   1  -5   2 34.5277 9.95552   1
  -1   5  -2 18.1321 11.2322   3
  -1   5  -2 26.7207 9.73124   1
  -1   5  -3 3648.62 242.417   2
   1  -5   3 3583.21 243.278   1
  -1   5  -3 3565.00 242.869   1
  -1   5  -3 3547.67 247.415   4
  -1   5  -3 3643.62 241.368   2
   1  -5   3 3546.38 244.393   3
  -1   5  -3 3525.66 244.313   3
  -1   5  -4 12498.3 824.616   1
  -1   5  -4 12496.6 829.228   4
   1  -5   4 12090.2 825.045   1
   1  -5   4 12582.9 826.502   3
  -1   5  -4 12202.7 826.019   3
  -1   5  -4 12295.4 824.021   2
   1  -5   5 40.2593 14.6569   3
   1  -5   5 49.3929 13.3194   1
  -1   5  -5 41.5503 14.4766   3
  -1   5  -5 72.2253 18.3251   4
  -1   5  -5 50.8205 12.0491   1
  -1   5  -5 35.7934 12.3963   2
  -1   5  -6 3217.15 233.228   4
   1  -5   6 3319.15 229.310   1
  -1   5  -6 3353.43 230.350   3
  -1   5  -6 3370.54 228.446   1
   1  -5   6 3392.00 230.839   3
  -1   5  -6 3333.51 228.191   2
  -1   5  -7 4985.51 338.356   4
  -1   5  -7 5006.09 334.545   3
  -1   5  -7 4787.93 331.909   2
   1  -5   7 4785.44 333.082   1
   1  -5   7 4878.41 335.140   3
  -1   5  -7 4937.67 332.245   1
   1  -5   8 212.058 25.8643   5
  -1   5  -8 253.167 29.1360   3
  -1   5  -8 229.191 31.8813   4
  -1   5  -8 248.256 26.0260   2
  -1   5  -8 232.514 26.3153   1
   1  -5   8 223.270 29.9719   3
  -1   5  -9 1151.48 84.7638   2
  -1   5  -9 1192.74 88.6124   3
   1  -5   9 1095.00 89.2335   3
   1  -5   9 1039.42 82.5879   5
  -1   5  -9 1082.02 91.4128   4
  -1   5  -9 1176.51 85.3634   1
   1  -5  10 17.4658 13.9420   7
  -1   5 -10 7.43714 18.0996   3
   1  -5  10 2.71904 21.1035   3
  -1   5 -10 5.88702 15.2776   1
   1  -5  10 6.92770 9.56931  27
  -1   5 -10 9.76800 18.9727   4
   1  -5  10-5.84368 13.0134   5
  -1   5 -10-4.86116 11.9258   2
   1  -5  11 3.11735 9.06233  23
   1  -5  11-0.97685 14.0424   7
   1  -5  11-5.80634 12.9794  25
   1  -5  11-10.0969 11.0209  27
   1  -5  12 661.592 51.0321  23
   1  -5  12 691.367 54.8151  25
   1  -5  12 665.422 51.4334  35
   1  -5  13 15.4351 14.7365   7
   1  -5  13-16.7475 14.8719   8
   1  -5  13-7.53985 10.1357  35
   1  -5  13 13.4437 14.5639  25
   1  -5  14 536.988 44.0934  25
   1  -5  14 474.467 39.6523  35
   1  -5  14 499.003 42.6006   8
   1  -5  14 609.393 45.2556   7
   1  -5  15-3.00112 14.8843   8
   1  -5  15 10.5381 11.1862  35
   1  -5  15 1.39949 16.1565   7
   1  -5  15 2.69016 16.4175  25
   1  -5  16 58.9762 18.5421   8
   1  -5  16 77.0632 19.3654  25
   1  -5  16 67.9509 13.7540  35
   1  -5  16 50.9235 20.0853   7
   1  -5  17 146.048 19.2442  35
   1  -5  17 202.194 20.6156  11
   1  -5  17 172.523 26.3119   7
   1  -5  17 159.716 24.2945  25
   1  -5  17 131.213 22.0938   8
   1  -5  18 0.63505 15.6780   8
   1  -5  18 22.5061 13.4083  11
   1  -5  18 25.0701 12.1445  35
   1  -5  19 258.375 23.8619  11
   1  -5  19 252.530 22.5745  35
   1  -5  20 12.0520 12.1216  11
   1  -5  20 7.85517 17.3798   7
   1  -5  21-32.0732 15.9639   7
   1  -5  21 8.36082 11.2440  11
  -1   5 -22 64.8121 15.1476  21
   1  -5  22 44.3416 16.6147   7
  -1   5 -23 1.71217 10.7330  21
   1  -5  23 5.02272 9.92474  27
   1  -5  23 28.1702 13.9068   7
  -1   4  25 18.6718 8.88637  35
   1  -4 -24 10.1503 9.43791  21
  -1   4  24 19.1751 7.12620  13
  -1   4  23 6.18193 8.77102  13
  -1   4  23-24.9988 18.2890   7
   1  -4 -23 3.60611 11.2268  21
  -1   4  23 10.9743 13.0841  35
   1  -4 -22 5.81533 12.6406  21
  -1   4  22 7.15190 14.4584  35
  -1   4  22 10.9037 18.0847   7
  -1   4  21 33.2369 16.0070  35
  -1   4  21 61.5044 20.4462   7
  -1   4  21 13.0393 10.7303  29
   1  -4 -21 52.7846 14.7917  21
  -1   4  20 18.0106 16.0868  35
   1  -4 -20 5.50872 14.0111  21
  -1   4  20 0.84850 17.7880   7
  -1   4  20-17.6275 12.5787  29
  -1   4  20 13.0175 16.7298  27
  -1   4  19 301.031 27.3241  29
  -1   4  19 343.777 30.9019  35
  -1   4  19 322.597 31.2984  27
   1  -4 -19 263.105 28.8154  21
  -1   4  19 349.908 35.0403   7
  -1   4  18 623.859 50.4252  29
  -1   4  18 735.758 53.1462  35
   1  -4 -18 644.066 51.9010  21
  -1   4  18 676.810 53.1320  27
  -1   4  18 840.225 58.2238   7
  -1   4  17 28.3833 15.0373  35
  -1   4  17 8.89127 15.0875  27
  -1   4  17 6.32557 11.4248  29
  -1   4  17-11.1740 19.6060   7
   1  -4 -17 7.53281 13.1063  21
  -1   4  16 368.899 32.9624  27
  -1   4  16 475.729 38.0072   7
  -1   4  16 347.060 31.2933  29
  -1   4  16 427.474 33.3508  35
  -1   4  15 305.376 28.9502   7
  -1   4  15 270.452 24.6278  35
  -1   4  15 253.656 23.3343  29
  -1   4  15 265.222 25.2299  27
  -1   4  14 198.134 22.3673   7
  -1   4  14 128.569 15.6874  23
  -1   4  14 168.884 17.4873  35
  -1   4  14 155.111 18.0582  27
  -1   4  14 169.023 16.7880  29
  -1   4  14 151.145 17.7917  11
  -1   4  13 226.240 20.7896  27
  -1   4  13 200.351 20.5097  11
  -1   4  13 200.159 19.3157  29
  -1   4  13 221.584 20.1878  35
   1  -4 -12 48.1560 22.8839   4
  -1   4  12 35.4032 17.8702   2
   1  -4 -12 37.7005 19.3852   1
   1  -4 -12 53.5549 19.7299   3
  -1   4  11 2433.39 185.320   2
   1  -4 -11 2294.18 185.717   4
   1  -4 -11 2781.84 183.157   1
   1  -4 -11 2595.86 182.364   3
   1  -4 -10 285.951 31.5270   2
   1  -4 -10 204.685 19.0107   5
   1  -4 -10 231.590 32.4036   4
   1  -4 -10 269.684 29.3290   3
   1  -4 -10 271.825 29.4913   1
  -1   4  10 197.491 31.0155   2
   1  -4  -9 85.2316 11.3939   5
   1  -4  -9 92.4438 21.1053   4
   1  -4  -9 77.1013 19.0068   3
   1  -4  -9 93.1497 19.5389   2
  -1   4   9 88.3132 22.0304   2
   1  -4  -8 1716.12 132.565   4
   1  -4  -8 1891.17 130.027   3
  -1   4   8 1808.49 133.296   2
  -1   4   7 780.501 60.1408   2
   1  -4  -7 633.710 57.7907   4
  -1   4   7 760.368 60.6592   4
  -1   4   6 998.972 83.1095   2
  -1   4   6 1115.33 84.4071   4
   1  -4  -6 1138.71 77.2724   6
   1  -4  -6 1117.88 83.1949   4
   1  -4  -5 198.827 24.6539   4
   1  -4  -5 191.827 18.1375   6
  -1   4   5 229.103 26.3615   4
   1  -4  -4 461.684 38.5738   2
   1  -4  -4 519.025 40.4883   4
   1  -4  -4 456.350 35.3949   6
   1  -4  -3 2331.70 166.979   1
   1  -4  -3 2296.84 169.291   4
   1  -4  -3 2712.92 167.988   2
   1  -4  -2 5153.36 346.362   1
  -1   4   2 4716.66 346.906   2
   1  -4  -2 5292.50 346.549   2
   1  -4  -2 5483.16 349.293   4
   1  -4  -2 5272.85 346.780   3
   1  -4  -1 2203.23 150.559   3
   1  -4  -1 2286.17 153.246   4
   1  -4  -1 2145.17 149.909   1
   1  -4  -1 2286.01 149.772   2
  -1   4   1 2171.15 150.437   2
   1  -4   0 5822.72 376.252   4
   1  -4   0 5711.42 373.757   3
  -1   4   0 5253.12 372.869   1
  -1   4   0 5381.77 375.983   4
   1  -4   0 5587.20 372.799   1
  -1   4   0 5560.81 372.704   2
   1  -4   0 5734.60 372.250   2
  -1   4  -1 86.2618 15.0287   4
   1  -4   1 94.4943 12.1842   3
  -1   4  -1 88.6695 9.95413   2
  -1   4  -1 86.5782 10.5956   1
   1  -4   1 82.4147 10.6813   1
  -1   4  -1 64.5506 11.7763   3
   1  -4   1 102.760 14.7995   4
  -1   4  -2 2308.02 183.380   3
   1  -4   2 2612.83 183.961   3
  -1   4  -2 2733.70 186.416   4
   1  -4   2 2731.52 182.934   1
  -1   4  -2 2754.89 182.725   1
  -1   4  -2 2914.46 181.730   2
  -1   4  -3 12421.9 831.612   4
  -1   4  -3 12803.4 827.709   2
   1  -4   3 12571.2 828.418   1
  -1   4  -3 12110.6 828.062   1
   1  -4   3 13046.1 829.672   3
  -1   4  -3 11552.4 829.013   3
  -1   4  -4 5238.92 365.333   4
  -1   4  -4 5524.56 361.350   2
  -1   4  -4 5394.27 361.505   1
  -1   4  -4 5292.10 362.847   3
   1  -4   4 5518.20 363.232   3
   1  -4   4 5251.14 361.887   1
  -1   4  -5 79.9915 14.2124   2
  -1   4  -5 45.5479 15.3915   3
  -1   4  -5 55.9139 12.7519   1
   1  -4   5 63.7029 13.7627   1
   1  -4   5 82.6131 16.6663   3
  -1   4  -5 37.8960 16.7461   4
   1  -4   6 23.5185 13.3139   3
  -1   4  -6 25.8401 11.7419   2
  -1   4  -6 14.0790 10.6328   1
  -1   4  -6 27.4215 13.0636   3
   1  -4   6 8.90184 11.4941   1
  -1   4  -6 13.6642 14.0635   4
  -1   4  -7 14221.4 930.258   1
   1  -4   7 13018.7 929.937   5
  -1   4  -7 14593.0 930.801   2
  -1   4  -7 14213.4 932.137   3
   1  -4   7 14201.8 932.993   3
  -1   4  -7 13160.1 934.232   4
  -1   4  -8 42.1694 15.4130   1
   1  -4   8 37.5366 19.0559   3
  -1   4  -8 24.1788 14.6438   2
   1  -4   8 36.2077 13.7535   5
  -1   4  -8 26.8721 18.5170   4
  -1   4  -8 62.1660 18.7488   3
  -1   4  -9 331.938 38.3448   4
  -1   4  -9 327.997 32.6414   2
  -1   4  -9 368.718 32.9649   1
   1  -4   9 256.644 28.1374   5
   1  -4   9 343.610 36.3243   3
  -1   4  -9 344.711 34.9751   3
  -1   4 -10 279.262 33.4003   3
  -1   4 -10 254.027 29.7854   2
  -1   4 -10 278.776 30.3575   1
  -1   4 -10 287.299 36.4137   4
   1  -4  10 281.052 25.8729   5
   1  -4  10 247.040 35.4544   3
  -1   4 -11 2.15228 13.1335   2
   1  -4  11 16.0433 12.7520   7
   1  -4  11 2.93934 9.77156  27
  -1   4 -11-24.1256 19.5131   1
   1  -4  11 3.28541 8.41589  23
   1  -4  12 290.941 30.8343   8
   1  -4  12 443.815 33.4650   7
   1  -4  12 330.480 28.7786  35
   1  -4  12 394.382 27.8190  18
   1  -4  12 351.383 32.2126  25
   1  -4  12 356.861 28.7409  23
   1  -4  13 78.1492 11.2685  18
   1  -4  13 101.482 13.3517  35
   1  -4  13 92.2264 16.8003   8
   1  -4  13 97.9586 17.6223  25
   1  -4  13 84.3226 13.8783  23
   1  -4  13 108.583 18.3076   7
   1  -4  14 229.257 25.4422   7
   1  -4  14 195.733 24.2814  25
   1  -4  14 205.357 18.6428  18
   1  -4  14 185.504 23.2744   8
   1  -4  14 203.126 20.2686  35
   1  -4  15 8.69574 14.1737   8
   1  -4  15 2.72765 17.1914   7
   1  -4  15-2.92611 11.5931  35
   1  -4  15 28.2256 16.4493  25
   1  -4  16-5.51116 15.5399   8
   1  -4  16 3.64166 16.3480   7
   1  -4  16 6.94070 11.0469  35
   1  -4  16 3.95640 16.3693  25
   1  -4  17 156.108 25.8778   7
   1  -4  17 148.950 19.5656  11
   1  -4  17 157.575 19.1015  35
   1  -4  17 164.007 23.8939  25
   1  -4  17 154.085 22.8143   8
   1  -4  18 105.067 16.4936  35
   1  -4  18 104.945 16.9821  11
   1  -4  18 93.6988 24.0281   7
   1  -4  18 99.0381 19.8221   8
   1  -4  19 37.8443 13.9180  11
   1  -4  19 49.0723 13.3934  35
   1  -4  19 36.5741 19.8346   7
   1  -4  20 3.71241 17.5916   7
   1  -4  20 19.8931 11.3983  35
   1  -4  20 18.4939 13.0803  11
   1  -4  21 0.69483 17.0519   7
   1  -4  21 17.6279 11.7722  11
   1  -4  21 28.5383 10.3772  35
   1  -4  22 29.3979 17.4595   7
  -1   4 -22 43.2771 15.6223  21
   1  -4  23 1.79467 11.3361  27
   1  -4  23 34.7938 15.0799   7
  -1   4 -23-3.81342 11.7639  21
   1  -4  24-8.28520 8.26696  27
  -1   4 -24-11.7172 9.44026  21
  -1   3  25 25.4622 8.46987  35
   1  -3 -25 12.8390 7.03544  21
  -1   3  24-17.7665 11.5180  35
   1  -3 -24-5.16946 9.72320  21
  -1   3  23 8.31900 16.5280   7
  -1   3  23 10.7024 8.19151  13
   1  -3 -23 9.98945 11.2175  21
  -1   3  23-7.87299 12.9445  35
  -1   3  22 287.697 26.5650  35
  -1   3  22 253.583 30.3850   7
   1  -3 -22 265.119 25.6361  21
  -1   3  21 10.5383 18.1414   7
   1  -3 -21 13.6481 13.8215  21
  -1   3  21-3.87390 10.3049  29
  -1   3  21-16.1729 16.4435  27
  -1   3  21-3.20315 14.8471  35
  -1   3  20 3.02891 11.7664  29
  -1   3  20 25.3171 16.7444  27
  -1   3  20 53.9567 20.3764   7
  -1   3  20 24.2764 15.9692  35
   1  -3 -20 21.5160 14.4126  21
  -1   3  19 539.731 42.9383  35
  -1   3  19 485.598 39.8689  29
  -1   3  19 511.676 46.3267   7
  -1   3  19 544.382 43.6876  27
   1  -3 -19 537.796 42.5420  21
  -1   3  18 24.2066 17.6233  27
  -1   3  18 40.8646 12.9327  29
  -1   3  18 56.0007 16.7625  35
  -1   3  18 19.1727 20.0081   7
  -1   3  17 376.559 31.4295  27
  -1   3  17 286.289 27.9968  29
  -1   3  17 354.155 34.6539   7
  -1   3  17 366.962 31.0722  35
  -1   3  16 4.60455 12.7485  27
  -1   3  16-22.9511 17.4943   7
  -1   3  16 2.91558 12.4168  11
  -1   3  16 6.72478 12.5652  35
  -1   3  16 3.25826 10.6528  29
  -1   3  16-3.73539 12.0693  18
  -1   3  15 135.787 17.5918  27
  -1   3  15 157.277 17.1308  35
  -1   3  15 118.032 15.2361  29
  -1   3  15 142.087 16.2458  18
  -1   3  15 176.810 22.0691   7
  -1   3  15 111.859 17.2798  11
  -1   3  14 619.442 50.4322  23
  -1   3  14 652.688 50.9127  29
  -1   3  14 723.239 51.6807  11
  -1   3  14 755.073 51.3427  18
  -1   3  14 658.932 51.5719  35
  -1   3  14 739.717 52.3209  27
  -1   3  13-1.14055 11.2797  11
  -1   3  13-4.21522 8.43633  29
  -1   3  13-1.95329 13.2373   7
  -1   3  13-2.81273 8.37398  35
  -1   3  13-12.0114 9.08718  23
   1  -3 -13-6.02092 23.7632   4
  -1   3  13-1.04473 9.64653  27
   1  -3 -12 69.4324 20.0871   2
  -1   3  12 86.9474 22.3550   2
   1  -3 -12 85.6770 22.1325   1
   1  -3 -12 51.7443 23.1431   4
   1  -3 -12 76.5795 22.1728   3
  -1   3  11-1.47481 16.0410   2
   1  -3 -11-1.14364 16.5275   1
   1  -3 -11-14.1008 21.1682   4
   1  -3 -11-3.45883 16.7780   3
   1  -3 -11-2.73026 16.8244   2
   1  -3 -10 981.209 73.3299   3
   1  -3 -10 956.088 72.6733   1
  -1   3  10 879.583 75.3876   2
   1  -3 -10 788.355 75.2850   4
   1  -3  -9 1980.88 113.789   3
  -1   3   9 1835.36 116.831   2
   1  -3  -9 1557.16 115.104   4
   1  -3  -9 1929.07 113.339   1
   1  -3  -8 17.0679 6.30372   5
   1  -3  -8 18.5263 16.4385   4
   1  -3  -8 6.26205 13.7463   3
   1  -3  -8 13.3755 15.1325   2
  -1   3   8 20.9833 18.1373   2
  -1   3   7 1790.96 129.308   2
   1  -3  -7 1918.43 126.856   3
   1  -3  -7 1620.63 127.904   4
  -1   3   6 629.900 49.5996   2
  -1   3   6 642.343 50.1263   4
   1  -3  -6 510.441 47.3981   4
   1  -3  -6 577.061 45.9906   3
  -1   3   5 2211.35 155.754   2
   1  -3  -5 2096.83 154.582   4
   1  -3  -5 2281.77 150.033   6
  -1   3   5 2171.52 155.517   4
  -1   3   4 40376.3 2948.95   2
   1  -3  -4 46366.9 2949.12   2
   1  -3  -4 46059.4 2945.71   6
   1  -3  -4 42437.2 2949.08   4
   1  -3  -3 196.279 20.6483   2
   1  -3  -3 199.045 20.4729   4
   1  -3  -2 1642.64 116.523   2
   1  -3  -2 1783.95 118.159   4
   1  -3  -1 6917.10 474.255   1
   1  -3  -1 7160.56 474.389   2
   1  -3  -1 7498.85 476.790   4
   1  -3  -1 7067.28 474.678   3
   1  -3   0 1042.16 71.5339   3
  -1   3   0 1001.95 73.4910   4
   1  -3   0 1061.87 70.5695   2
   1  -3   0 979.130 73.4798   4
  -1   3   0 1040.46 71.1330   2
   1  -3   0 1043.26 70.8862   1
   1  -3   1 344.781 29.2657   4
  -1   3  -1 318.649 29.2042   4
   1  -3   1 381.597 26.3942   1
   1  -3   1 374.587 27.4510   3
  -1   3  -1 328.429 26.1692   1
  -1   3  -1 378.989 25.7951   2
  -1   3  -2 299.833 26.9054   4
   1  -3   2 305.840 23.7064   1
   1  -3   2 313.042 24.8535   3
  -1   3  -2 312.486 23.7191   1
  -1   3  -3 10832.7 696.178   2
   1  -3   3 10406.9 697.457   3
   1  -3   3 10228.7 696.664   1
  -1   3  -3 10424.5 696.342   1
  -1   3  -3 10118.3 699.213   4
   1  -3   4 3697.49 243.849   3
  -1   3  -4 3429.69 242.153   1
  -1   3  -4 3758.30 242.501   2
   1  -3   4 3441.55 242.711   1
  -1   3  -4 3732.24 245.823   4
  -1   3  -5 708.717 50.4494   2
  -1   3  -5 715.046 49.9046   1
   1  -3   5 618.944 50.3008   1
   1  -3   5 634.563 51.1496   3
  -1   3  -5 642.202 53.4482   4
  -1   3  -6 22188.2 1409.57   4
   1  -3   6 21569.1 1407.37   3
  -1   3  -6 22171.0 1405.63   1
   1  -3   6 20324.8 1405.46   5
  -1   3  -6 22801.6 1406.33   2
  -1   3  -6 18159.2 1405.78   3
   1  -3   7 7.60514 10.4682   5
   1  -3   7 25.9884 13.8809   3
  -1   3  -7 18.8725 11.1116   1
  -1   3  -7 3.70713 14.5837   4
  -1   3  -7 8.88803 12.3994   2
  -1   3  -7 13.3592 12.9971   3
  -1   3  -8 24.3474 17.8465   4
  -1   3  -8 70.7036 16.1482   2
   1  -3   8 55.2168 19.2682   3
  -1   3  -8 30.9788 18.0798   3
  -1   3  -8 61.4944 14.7318   1
   1  -3   8 19.1118 12.2097   5
  -1   3  -9 713.359 58.3585   2
  -1   3  -9 662.916 62.2135   4
  -1   3  -9 717.579 60.0920   3
  -1   3  -9 782.486 58.1640   1
   1  -3   9 759.121 61.9455   3
   1  -3   9 703.377 53.9776   5
   1  -3  10 283.629 24.2071   5
  -1   3 -10 253.000 28.7846   1
  -1   3 -10 264.808 32.2785   3
  -1   3 -10 230.193 33.9851   4
  -1   3 -10 277.395 30.2795   2
  -1   3 -11-17.1099 21.5395   3
   1  -3  11 32.0936 8.38462   5
  -1   3 -11 10.8800 13.7843   2
  -1   3 -11 17.2971 14.4986   1
  -1   3 -11 7.69078 18.9968   4
   1  -3  12 113.007 13.6514  23
   1  -3  12 156.340 18.3753   7
   1  -3  12 119.100 17.0003  25
  -1   3 -12 91.8827 19.6890   2
   1  -3  12 91.9182 16.5707   8
   1  -3  13 766.591 57.1677  35
   1  -3  13 816.370 56.1842  18
   1  -3  13 791.086 59.1319   8
   1  -3  13 932.660 61.3336   7
   1  -3  13 766.097 56.9613  23
   1  -3  13 709.439 59.2066  25
   1  -3  14 838.221 61.1522  25
   1  -3  14 792.524 56.8756  18
   1  -3  14 781.468 60.2347   8
   1  -3  14 888.781 61.9750   7
   1  -3  14 745.345 57.9774  35
   1  -3  15-1.67598 14.0636   8
   1  -3  15 4.59562 14.8629   7
   1  -3  15-1.64548 10.4510  35
   1  -3  15 8.56999 14.1514  25
   1  -3  16 72.7796 13.8822  35
   1  -3  16 79.4009 17.4929   8
   1  -3  16 73.7735 17.6823  25
   1  -3  16 87.0547 19.1511   7
   1  -3  16 66.2997 15.1161  11
   1  -3  17 29.5893 18.5927   7
   1  -3  17 21.2480 17.2334   8
   1  -3  17 49.5235 16.5478  25
   1  -3  17 12.4366 13.9655  11
   1  -3  17 45.0328 13.2885  35
   1  -3  18 146.088 18.4532  35
   1  -3  18 139.523 23.9889   7
   1  -3  18 121.900 18.2383  11
   1  -3  19 80.6635 15.7837  11
   1  -3  19 82.5381 22.3065   7
   1  -3  19 90.6474 15.2394  35
   1  -3  20 8.24085 11.1766  35
   1  -3  20-0.77703 16.9043   7
   1  -3  20-25.4141 13.6709  11
   1  -3  21 54.0734 12.8246  11
   1  -3  21 33.9543 11.4948  35
   1  -3  21 19.6123 18.7989   7
   1  -3  22-12.6666 16.0306   7
  -1   3 -22 4.17238 15.1588  21
   1  -3  22 1.08578 9.13731  35
   1  -3  23 10.5226 15.3467   7
  -1   3 -23 4.48549 12.2764  21
   1  -3  23-11.5448 11.7091  27
   1  -3  24 1.25910 9.75134  27
   1  -3  24 24.9809 14.1100   7
  -1   3 -24 6.34397 10.2096  21
   1  -2 -25-0.16922 6.79492  21
  -1   2  25 10.8628 7.53775  35
  -1   2  24 9.58335 15.5141   7
   1  -2 -24 5.95462 9.66964  21
  -1   2  24 11.3926 10.2556  35
  -1   2  23 26.6180 18.1381   7
  -1   2  23 23.2077 12.8245  35
   1  -2 -23 29.7641 12.3904  21
  -1   2  22 115.529 22.1099   7
   1  -2 -22 70.3039 15.9968  21
  -1   2  22 80.3387 16.6578  35
   1  -2 -21 63.7126 15.9144  21
  -1   2  21 48.7545 17.4623  27
  -1   2  21 71.8378 16.7225  35
  -1   2  21 60.6480 20.6002   7
  -1   2  20 6.65644 10.2285  29
  -1   2  20 25.0777 16.7341  27
  -1   2  20 4.74181 17.9804   7
  -1   2  20 6.26113 15.7603  35
   1  -2 -20 13.7662 15.0499  21
  -1   2  19 849.950 60.0992  27
  -1   2  19 850.905 59.7107  35
  -1   2  19 685.496 56.3875  29
  -1   2  19 826.493 63.1976   7
  -1   2  18 95.0374 18.5758  35
  -1   2  18 80.6672 19.4928  27
  -1   2  18 120.189 15.7563  29
  -1   2  18 125.286 23.0704   7
  -1   2  18 116.026 17.6083  11
  -1   2  17 301.064 27.3356  11
  -1   2  17 266.643 25.8212  29
  -1   2  17 358.033 33.1724   7
  -1   2  17 295.097 29.0465  27
  -1   2  17 295.735 28.6124  35
  -1   2  16 10.1283 13.1640  27
  -1   2  16 9.57256 10.8213  29
  -1   2  16 15.8127 12.3877  18
  -1   2  16 1.31895 16.3398   7
  -1   2  16 29.7435 13.4396  35
  -1   2  16 18.7873 13.1117  11
  -1   2  15 123.325 17.7585  11
  -1   2  15 173.505 21.6400   7
  -1   2  15 142.951 16.6106  18
  -1   2  15 153.708 18.1871  27
  -1   2  15 120.729 15.6585  29
  -1   2  15 146.024 17.2241  35
  -1   2  15 135.337 16.6589  23
  -1   2  14 1055.47 84.7810  23
  -1   2  14 1534.36 89.5553   7
  -1   2  14 1220.44 85.4800  11
  -1   2  14 1376.85 85.6405  18
  -1   2  14 1085.04 84.7320  29
  -1   2  14 1224.55 86.1194  35
  -1   2  14 1277.40 86.1428  27
  -1   2  13 75.9828 11.7910  23
  -1   2  13 50.3418 10.6716  29
  -1   2  13 103.793 16.3689   7
  -1   2  13 56.9869 11.0967  18
  -1   2  13 76.9602 11.6258  35
   1  -2 -13 44.5239 26.6062   4
  -1   2  13 58.0564 12.9156  11
  -1   2  13 80.0614 12.5193  27
  -1   2  12 80.2890 21.4891   2
   1  -2 -12 94.6321 22.8548   3
   1  -2 -12 112.009 28.7299   4
   1  -2 -12 113.047 24.2495   1
   1  -2 -12 108.411 23.2470   2
   1  -2 -11 588.336 53.4463   2
   1  -2 -11 629.305 51.9622   1
   1  -2 -11 441.319 53.7023   4
   1  -2 -11 576.884 51.4130   3
  -1   2  11 555.148 53.8441   2
   1  -2 -10 113.057 22.7150   2
   1  -2 -10 105.252 20.3051   3
  -1   2  10 69.5092 21.0564   2
   1  -2 -10 111.948 20.9306   1
   1  -2 -10 58.3547 21.5070   4
   1  -2  -9 44.9140 16.0018   1
  -1   2   9 12.5525 16.6530   2
   1  -2  -9 33.6430 16.0856   3
   1  -2  -9 19.1951 17.7355   4
  -1   2   8 258.537 28.0199   2
   1  -2  -8 285.835 25.3817   3
   1  -2  -8 279.488 23.7383   1
   1  -2  -8 225.078 26.0520   4
  -1   2   7 63.5151 18.5162   2
   1  -2  -7 57.0629 14.5864   3
   1  -2  -7 48.4671 15.0295   1
   1  -2  -7 49.6924 17.2453   4
   1  -2  -7 51.9374 6.24533   5
   1  -2  -6 1005.08 66.1652   5
   1  -2  -6 828.477 72.1243   4
   1  -2  -6 1007.21 71.2226   3
  -1   2   6 880.048 74.0773   2
  -1   2   5 115.920 20.2076   2
   1  -2  -5 109.981 15.7058   3
   1  -2  -5 76.4449 15.9864   4
   1  -2  -4 7864.44 537.943   4
   1  -2  -4 8221.25 534.321   6
  -1   2   4 7535.29 538.482   2
   1  -2  -3 31.8911 9.86935   4
  -1   2   3 22.6762 14.1326   2
   1  -2  -3 27.0580 12.3461   2
   1  -2  -2 31.1676 8.54428   4
   1  -2  -2 18.1932 9.58237   2
   1  -2  -1 24288.9 1593.19   2
   1  -2  -1 25584.2 1594.27   4
   1  -2  -1 22855.2 1592.70   3
   1  -2   0 261.342 19.5679   3
   1  -2   0 261.871 19.0011   1
   1  -2   0 265.937 21.3488   4
  -1   2   0 270.748 21.5443   4
   1  -2   0 270.385 19.0313   2
   1  -2   1 452.192 34.4290   4
   1  -2   1 459.259 32.0649   1
  -1   2  -1 458.526 34.5263   4
   1  -2   1 474.491 32.8454   3
   1  -2   2 6221.25 39.2836   1
  -1   2  -2 6027.27 57.3131   4
   1  -2   2 6025.14 45.3155   3
  -1   2  -3 44.8250 9.32422   2
  -1   2  -3 51.5881 8.29776   1
   1  -2   3 47.3073 10.5094   3
   1  -2   3 48.6024 8.92255   1
  -1   2  -3 39.7546 11.3147   4
  -1   2  -4 97.6575 15.4485   4
   1  -2   4 61.7402 12.1435   1
  -1   2  -4 111.076 13.4109   2
  -1   2  -4 107.818 11.8999   1
   1  -2   4 51.9063 12.9154   3
  -1   2  -5 7267.47 457.944   2
   1  -2   5 6329.66 457.240   5
   1  -2   5 6556.28 457.030   2
  -1   2  -5 7145.09 457.405   1
   1  -2   5 6930.56 458.669   3
  -1   2  -6 4414.31 277.657   2
  -1   2  -6 4340.17 276.620   1
   1  -2   6 4235.43 278.156   3
   1  -2   6 3882.78 276.224   2
   1  -2   6 3736.17 275.374   5
  -1   2  -7 1070.95 72.7571   2
  -1   2  -7 1009.62 71.5144   1
   1  -2   7 902.338 69.2055   5
   1  -2   7 998.046 73.5692   3
   1  -2   7 927.717 71.6579   2
  -1   2  -8 148.882 19.2549   1
   1  -2   8 142.113 16.4955   5
   1  -2   8 157.590 20.2490   2
  -1   2  -8 170.238 21.8026   2
   1  -2   8 121.450 21.2614   3
  -1   2  -9 828.514 73.1180   3
  -1   2  -9 1025.12 73.2546   1
  -1   2  -9 1094.87 75.2184   2
   1  -2   9 933.354 68.5940   5
   1  -2  10 882.001 66.6381   5
  -1   2 -10 982.114 74.8896   3
  -1   2 -10 938.933 77.5910   4
  -1   2 -10 1039.54 73.5929   1
  -1   2 -10 930.490 73.5450   2
  -1   2 -11 20.6519 14.6834   2
  -1   2 -11 19.5625 17.5267   3
  -1   2 -11-1.44257 17.6530   4
  -1   2 -11 36.6564 16.2468   1
  -1   2 -12 52.7120 18.0091   1
   1  -2  12 60.1593 14.0977   8
   1  -2  12 41.1525 10.0439  23
   1  -2  12 96.8116 15.6681   7
  -1   2 -12 53.3374 16.8609   2
   1  -2  13 119.593 14.8634  35
   1  -2  13 116.112 13.7393  18
   1  -2  13 146.664 18.0587  25
   1  -2  13 167.035 19.8739   7
  -1   2 -13 111.950 21.3838   2
   1  -2  13 130.838 18.4732   8
   1  -2  14 493.430 35.7369  18
   1  -2  14 438.212 38.7033   8
   1  -2  14 467.512 39.1507  25
   1  -2  14 432.611 36.6939  35
   1  -2  14 551.282 41.1088   7
   1  -2  15 351.582 33.6951  25
   1  -2  15 411.116 34.2550   8
   1  -2  15 434.850 36.1953   7
   1  -2  15 354.064 31.3435  35
   1  -2  16 91.7830 20.5053   7
   1  -2  16 117.654 18.7518  25
   1  -2  16 88.7009 16.2987  11
   1  -2  16 87.0268 15.0478  35
   1  -2  16 123.290 18.8834   8
   1  -2  17 50.5038 13.4111  35
   1  -2  17 37.1458 19.1870   7
   1  -2  17 36.7701 13.8541  11
   1  -2  17 62.1065 16.8990   8
   1  -2  18 100.503 17.7925  11
   1  -2  18 144.252 24.6173   7
   1  -2  18 137.226 17.9766  35
   1  -2  19 32.0721 20.0047   7
   1  -2  19 57.5341 14.3362  11
   1  -2  19 73.4719 14.3066  35
   1  -2  20 0.78956 16.6030   7
   1  -2  20 19.9819 12.3731  35
   1  -2  21-26.8765 18.1708   7
   1  -2  21-18.5467 12.1524  11
   1  -2  21 6.31007 10.9872  35
   1  -2  22 21.0962 10.3979  35
   1  -2  22 25.1926 18.1556   7
  -1   2 -22 36.6111 16.1410  21
  -1   2 -23 10.6541 13.3005  21
   1  -2  23 1.17580 7.76444  35
   1  -2  23 17.5236 16.4858   7
   1  -2  24 9.56508 10.9167  27
  -1   2 -24 23.7206 11.2548  21
   1  -1 -25 24.1723 7.29928  21
  -1   1  25 36.5847 7.67837  35
  -1   1  24 14.5692 9.89465  35
   1  -1 -24 4.59241 9.91777  21
  -1   1  24 25.4912 15.6609   7
  -1   1  23 63.9977 13.2799  35
   1  -1 -23 38.5376 13.0834  21
  -1   1  23 56.2911 18.2700   7
   1  -1 -22 1.98573 13.1346  21
  -1   1  22 32.9856 16.7553   7
  -1   1  22-14.7749 15.6972  27
  -1   1  22 16.5419 14.1190  35
  -1   1  21-0.44402 14.2911  35
  -1   1  21 13.7362 18.0266   7
  -1   1  21-26.0285 16.2592  27
   1  -1 -21-4.47937 14.3662  21
  -1   1  20 170.796 23.0316  27
  -1   1  20 156.377 25.5393   7
  -1   1  20 198.003 22.2841  35
  -1   1  19 126.688 18.7116  35
  -1   1  19 80.0553 14.1556  29
  -1   1  19 114.129 23.0621   7
  -1   1  19 93.7809 20.0291  27
  -1   1  19 99.3567 16.9630  11
  -1   1  18 147.596 18.1937  29
  -1   1  18 202.825 22.4445  35
  -1   1  18 174.616 20.8468  11
  -1   1  18 143.015 22.2499  27
  -1   1  18 169.024 25.0317   7
  -1   1  17 32.2677 14.6141  11
  -1   1  17 2.39966 13.6224  18
  -1   1  17 9.41598 11.4119  29
  -1   1  17 17.2529 14.8556  35
  -1   1  17 17.8547 17.9470   7
  -1   1  17-21.6857 16.5474  27
  -1   1  16 12.2775 12.8211  35
  -1   1  16 25.9098 14.1146  27
  -1   1  16 3.03365 12.1884  18
  -1   1  16 5.95649 15.4072   7
  -1   1  16 26.5361 13.4629  11
  -1   1  16 8.88698 10.5479  29
  -1   1  15 1067.30 73.6064  35
  -1   1  15 1077.86 73.5752  27
  -1   1  15 982.865 72.5853  11
  -1   1  15 898.278 71.9321  29
  -1   1  15 933.802 72.3191  23
  -1   1  15 1092.19 72.8319  18
  -1   1  14 55.1167 16.5482   7
  -1   1  14 20.6269 11.6377  27
  -1   1  14 21.1914 12.4324  11
  -1   1  14 10.2150 9.54876  29
  -1   1  14 19.6044 10.7962  35
  -1   1  14 25.1395 10.4851  18
  -1   1  14 22.5036 10.8854  23
  -1   1  13 262.161 22.6668  29
  -1   1  13 306.388 26.7551   7
  -1   1  13 271.380 22.7776  18
  -1   1  13 271.102 23.2580  23
  -1   1  13 301.246 26.2298   8
  -1   1  13 260.944 23.5219  27
  -1   1  13 279.269 23.7797  35
  -1   1  13 249.993 23.8142  11
   1  -1 -12 860.525 75.6889   3
  -1   1  12 740.233 75.9184   2
   1  -1 -12 831.701 76.6981   2
   1  -1 -12 707.065 79.2761   4
   1  -1 -11 37.4637 22.3256   4
   1  -1 -11 91.4465 20.8505   3
  -1   1  11 67.5971 19.9596   2
   1  -1 -11 81.3893 20.6792   2
  -1   1  10 2305.63 176.474   2
   1  -1 -10 2719.65 174.917   1
   1  -1 -10 2563.55 177.080   2
   1  -1 -10 2589.24 174.575   3
   1  -1 -10 1996.31 176.250   4
   1  -1  -9 20.4344 15.2436   3
   1  -1  -9 21.5525 16.4430   2
  -1   1   9 36.6205 16.7650   2
   1  -1  -9 19.5616 17.1591   4
   1  -1  -9 55.8555 16.2262   1
  -1   1   8 111.279 22.8527   2
   1  -1  -8 100.127 21.3695   4
   1  -1  -8 141.226 19.7910   1
   1  -1  -8 129.913 19.9526   3
  -1   1   7 1098.26 82.9156   2
   1  -1  -7 1163.28 80.6733   1
   1  -1  -7 986.146 82.6156   4
   1  -1  -7 1086.24 80.1479   3
   1  -1  -6 63.9611 16.3858   4
   1  -1  -6 69.6262 14.7154   3
  -1   1   6 45.3823 18.7364   2
   1  -1  -6 71.9144 14.0808   1
   1  -1  -5 666.175 52.1707   4
   1  -1  -5 843.161 51.4157   3
   1  -1  -5 614.863 44.9856   5
  -1   1   5 818.357 54.3981   2
   1  -1  -5 886.103 51.6499   1
   1  -1  -4 682.467 46.9499   3
  -1   1   4 620.738 49.4708   2
   1  -1  -4 574.132 47.3116   4
   1  -1  -3 10178.8 696.704   3
  -1   1   3 11434.3 698.513   2
   1  -1  -3 10025.6 697.276   4
  -1   1   2 21336.6 1330.21   2
   1  -1  -2 18781.7 1329.10   4
   1  -1  -2 20347.0 1329.97   2
   1  -1  -1 1329.21 85.0362   4
   1  -1  -1 1229.45 85.2416   2
  -1   1   1 1184.17 85.2325   2
  -1   1  -1 464.157 29.8542   4
   1  -1   1 405.875 27.8863   1
   1  -1   1 393.996 28.3972   3
   1  -1   2 131.801 10.3079   1
   1  -1   2 108.101 9.97963   2
   1  -1   2 117.448 10.7963   3
  -1   1  -3 1214.38 85.4386   2
   1  -1   3 1290.12 86.2510   3
   1  -1   3 1250.06 85.3792   2
   1  -1   4 67.1772 12.3128   2
   1  -1   4 86.1640 11.6169   5
   1  -1   4 86.9447 12.4793   3
  -1   1  -4 97.7057 13.0934   2
   1  -1   5 29903.8 2090.81   5
  -1   1  -5 30699.1 2091.52   1
   1  -1   5 31749.7 2092.69   3
  -1   1  -5 35924.7 2092.70   2
   1  -1   5 30319.5 2091.64   2
   1  -1   6 3480.40 239.478   3
   1  -1   6 3399.20 236.605   5
   1  -1   6 3244.51 238.255   2
  -1   1  -6 3829.44 238.571   1
  -1   1  -6 3673.90 239.322   2
   1  -1   7 147.145 20.7030   3
   1  -1   7 165.003 16.6850   5
   1  -1   7 166.626 20.4613   2
  -1   1  -7 156.371 19.4002   1
  -1   1  -7 195.536 21.3662   2
   1  -1   8 324.022 25.7156   5
  -1   1  -8 335.973 31.3339   2
  -1   1  -8 345.297 30.2707   1
   1  -1   8 247.098 29.5011   2
   1  -1   9 318.862 25.7966   5
  -1   1  -9 354.698 32.7692   2
  -1   1  -9 326.670 31.2326   1
   1  -1   9 261.710 30.6141   2
   1  -1  10 1214.70 104.179   2
  -1   1 -10 1571.38 105.271   1
  -1   1 -10 1505.99 106.161   2
  -1   1 -11 6.79488 15.2362   1
  -1   1 -11 17.7502 20.9294   4
   1  -1  11 29.3546 14.6045   2
  -1   1 -11 7.63480 14.2909   2
  -1   1 -12 65.6007 20.3010   3
   1  -1  12 68.9275 14.9203   7
   1  -1  12 61.0215 13.5745   8
   1  -1  12 46.6122 10.4184  23
  -1   1 -12 64.0577 18.7306   1
   1  -1  12 45.4761 17.1046   2
  -1   1 -12 27.9752 15.8812   2
  -1   1 -12 64.6521 27.3044   4
   1  -1  13 2358.63 173.284  23
  -1   1 -13 2188.17 182.969   2
   1  -1  13 2684.63 175.389   8
   1  -1  13 2649.60 173.134  18
   1  -1  13 2416.16 173.743  35
   1  -1  14 60.1103 15.9877   7
   1  -1  14 47.9271 11.6040  35
   1  -1  14 59.8516 15.0341   8
   1  -1  14 52.3073 14.1406  25
   1  -1  14 61.7338 11.2399  18
   1  -1  15 992.895 69.9757   8
   1  -1  15 1123.84 72.1691   7
   1  -1  15 882.925 67.4858  35
   1  -1  15 910.060 67.2388  11
   1  -1  15 897.624 69.4479  25
   1  -1  16 37.6473 18.9273   7
   1  -1  16 68.1111 16.8387   8
   1  -1  16 41.8982 13.8134  11
   1  -1  16 50.3215 12.7725  35
   1  -1  17 6.63564 16.7348   7
   1  -1  17 6.09080 12.8248  11
   1  -1  17 20.5890 12.0119  35
   1  -1  18 74.9948 15.1424  35
   1  -1  18 67.9693 15.4071  11
   1  -1  18 61.4256 21.7155   7
   1  -1  19 26.3548 13.6407  35
   1  -1  19 0.79904 17.2465   7
   1  -1  19-14.9326 13.6309  11
   1  -1  20-19.3725 13.5747  11
   1  -1  20 6.52069 12.2558  35
   1  -1  20 1.62671 18.9586   7
   1  -1  21-1.18952 11.9302  35
   1  -1  21-0.78448 18.0605   7
   1  -1  22-1.36759 10.6414  35
  -1   1 -22 40.4525 15.7225  21
  -1   1 -23 177.139 19.2963  21
   1  -1  23 122.534 15.0088  35
   1  -1  24-9.51735 11.6201  27
  -1   1 -24-6.81039 11.0338  21
  -1   1 -25 2.25948 8.57880  21
  -1   0  24 29.5186 15.0632   7
   1   0 -24 30.5811 10.0353  21
  -1   0  24 19.2483 9.42545  35
  -1   0  23 12.4961 15.2741   7
  -1   0  23 3.43670 11.2406  35
   1   0 -23 21.4740 11.8089  21
   1   0 -22 105.094 16.6552  21
  -1   0  22 87.7580 16.4391  35
  -1   0  22 92.3022 17.5539  27
  -1   0  22 89.0298 20.6985   7
  -1   0  21 23.3604 14.8041  35
  -1   0  21 19.8395 15.9266  27
  -1   0  21 14.7571 19.2213   7
   1   0 -21 28.1870 15.0266  21
  -1   0  20 84.5238 19.3983  27
  -1   0  20 52.7433 20.5418   7
  -1   0  20 111.153 18.3944  35
  -1   0  19 69.0818 15.8628  11
  -1   0  19 72.5927 13.1097  29
  -1   0  19 78.5339 17.4923  35
  -1   0  19 97.0723 19.3017  27
  -1   0  19 85.1785 21.2668   7
  -1   0  18 185.374 20.4537  11
  -1   0  18 127.445 21.5412  27
  -1   0  18 182.097 21.2400  35
  -1   0  18 160.226 24.4911   7
  -1   0  18 128.454 17.6784  29
  -1   0  17 120.484 22.9579   7
  -1   0  17 146.599 18.7281  11
  -1   0  17 108.831 19.9538  27
  -1   0  17 132.375 19.0382  35
  -1   0  17 122.563 18.0961  18
  -1   0  17 100.507 15.7984  29
  -1   0  16 14.9234 13.6720  27
  -1   0  16 29.3568 12.8121  18
  -1   0  16 24.7422 13.9318  11
  -1   0  16 13.4525 10.8336  29
  -1   0  16 4.00853 13.5183  23
  -1   0  16 10.6971 16.1727   7
  -1   0  16 15.1878 12.7634  35
  -1   0  15 183.180 20.3291  35
  -1   0  15 169.921 20.5852  11
  -1   0  15 181.968 20.3518  23
  -1   0  15 221.284 24.6288   7
  -1   0  15 217.281 20.9446  27
  -1   0  15 148.478 18.4594  29
  -1   0  15 213.042 19.5527  18
  -1   0  14 8.94467 11.5005  23
  -1   0  14 12.2210 11.2463  27
  -1   0  14 18.7886 10.3949  18
  -1   0  14 15.1334 10.9338  35
  -1   0  14 30.1444 14.9312   7
  -1   0  14 21.6765 12.8240  11
  -1   0  14 19.2382 14.0958   8
  -1   0  14 22.6708 9.33470  29
  -1   0  13 127.511 16.4833  11
  -1   0  13 129.556 15.4947  35
  -1   0  13 134.840 15.7979  27
  -1   0  13 147.207 14.9590  18
  -1   0  13 161.819 19.4734   7
  -1   0  13 157.257 15.9338  23
  -1   0  13 99.5218 14.0294  29
  -1   0  13 138.751 18.7346   8
  -1   0  12 61.9882 21.5387   2
   1   0 -12 91.4728 21.7613   2
   1   0 -12 49.4818 26.5050   4
  -1   0  12 83.9543 11.2802  18
  -1   0  12 59.6711 11.4717  35
  -1   0  12 81.2172 11.7593  23
  -1   0  12 90.8864 15.0254   8
   1   0 -11 306.694 36.3843   2
   1   0 -11 310.663 34.6725   3
   1   0 -11 315.305 41.1057   4
  -1   0  11 289.463 35.9812   2
   1   0 -10 19.7235 16.5892   2
  -1   0  10-3.68643 14.7764   2
   1   0 -10 10.1487 20.6562   4
   1   0 -10-3.10509 17.1049   3
   1   0  -9 4.34037 14.5382   1
  -1   0   9 25.9816 16.8391   2
   1   0  -9 18.5121 16.7838   2
   1   0  -9 27.1169 15.0161   3
   1   0  -9 8.72712 17.4084   4
  -1   0   8 269.672 31.9622   2
   1   0  -8 314.393 29.7095   1
   1   0  -8 297.057 29.9769   3
   1   0  -8 313.324 31.8577   2
   1   0  -8 220.362 31.9107   4
   1   0  -7 1258.73 89.4167   1
  -1   0   7 1148.81 91.0651   2
   1   0  -7 1296.31 89.4993   3
   1   0  -7 1157.64 91.8968   4
   1   0  -6 2204.27 152.385   3
  -1   0   6 2124.08 154.217   2
   1   0  -6 2276.97 152.571   1
   1   0  -6 2154.30 154.723   4
   1   0  -5 254.559 23.1827   1
  -1   0   5 210.099 25.5888   2
   1   0  -5 251.840 23.0612   3
  -1   0   5 195.172 22.4295   3
   1   0  -5 268.154 25.5468   4
   1   0  -4 329.572 26.4717   1
   1   0  -4 329.749 29.5759   2
   1   0  -4 334.594 26.7961   3
  -1   0   4 297.652 29.6372   2
  -1   0   4 288.726 26.2236   3
   1   0  -3 15965.3 987.347   3
  -1   0   3 12777.3 986.681   3
  -1   0   3 16602.4 988.835   2
   1   0  -3 14971.5 987.389   1
   1   0  -2 6037.55 393.023   1
  -1   0   2 6568.50 394.204   2
   1   0  -2 6728.57 393.303   4
   1   0  -2 6002.58 392.835   3
   1   0  -1 45.7591 5.31374   1
   1   0   2 3615.16 227.227   2
  -1   0  -2 3815.35 227.869   5
  -1   0  -2 3103.82 227.064   3
   1   0   2 3174.62 227.404   5
   1   0   3 1253.08 83.7610   2
  -1   0  -3 1180.71 83.2851   5
  -1   0  -4 142.379 15.7407   5
   1   0   4 211.419 15.8790   5
   1   0   4 189.715 18.4319   2
  -1   0  -4 146.064 17.3512   2
  -1   0  -5 941.410 62.6881   2
   1   0   5 833.531 61.8874   2
   1   0   5 808.266 59.3656   5
  -1   0  -6 2432.66 181.803   1
   1   0   6 2692.19 183.182   2
   1   0   6 2659.89 180.097   5
  -1   0  -6 2970.45 183.811   2
  -1   0  -7 54.9286 13.4678   1
   1   0   7 29.0205 8.84961   5
  -1   0  -7 80.7035 15.6800   2
   1   0   7 51.6747 14.9141   2
  -1   0  -8 889.603 63.4884   2
   1   0   8 701.607 61.9001   2
  -1   0  -8 854.439 61.6395   1
   1   0   8 796.098 57.2584   5
   1   0   9 391.626 39.9919   2
  -1   0  -9 486.846 41.7710   2
  -1   0  -9 479.622 40.0002   1
  -1   0  -9 465.841 46.0571   4
  -1   0 -10 7.80394 15.1513   2
  -1   0 -10 11.9364 13.9479   1
   1   0  10 5.91838 13.5490   2
  -1   0 -10 7.50792 19.3809   4
  -1   0 -11 109.582 19.9043   1
   1   0  11 95.4786 19.1615   2
   1   0  11 68.9595 9.03853   6
  -1   0 -11 80.9422 26.1169   4
  -1   0 -11 107.544 19.5348   2
  -1   0 -12 1017.76 49.3912   2
   1   0  12 903.659 48.5645   2
  -1   0 -12 993.815 62.6850   4
   1   0  13 102.062 13.3401  35
  -1   0 -13 100.039 21.4317   2
   1   0  13 91.0187 21.1300   2
   1   0  13 120.048 17.8168   7
   1   0  13 119.580 16.8835   8
   1   0  13 118.565 13.2059  18
   1   0  14 224.693 23.1883   7
   1   0  14 169.844 18.3328  11
   1   0  14 175.580 17.6526  18
   1   0  14 196.445 21.1307   8
   1   0  14 192.340 20.7789  25
   1   0  14 152.672 17.6293  35
   1   0  15 97.3293 16.9276  11
   1   0  15 146.554 22.1740   7
   1   0  15 140.682 17.0224  35
   1   0  16 293.413 29.3281   7
   1   0  16 218.820 24.0627  11
   1   0  16 278.912 24.3403  35
   1   0  17 60.4437 14.1742  11
   1   0  17 60.0869 19.5774   7
   1   0  17 65.5750 14.3933  35
   1   0  18 45.0844 14.3137  11
   1   0  18 36.8781 13.7084  35
   1   0  19 563.332 42.1496  35
   1   0  19 491.648 40.6357  11
   1   0  20-26.9663 13.5473  11
   1   0  20 8.50820 12.8796  35
   1   0  21 3.74768 12.5494  35
  -1   0 -21-2.01304 16.6653  21
  -1   0 -22 44.9855 17.1179  21
   1   0  22 55.8824 13.5395  35
   1   0  23 17.3663 10.4991  35
  -1   0 -23 32.6070 14.7753  21
  -1   0 -24-3.89682 11.7297  21
   1   0  24-2.63382 12.3168  27
   1   0  24 11.4311 8.06913  35
  -1   0 -25 29.2827 9.98829  21
   1   1 -24 10.3146 9.13166  21
  -1  -1  24-0.46334 13.4616   7
  -1  -1  24 18.4293 8.19339  35
   1   1 -23 74.7240 13.5204  21
  -1  -1  23 54.3439 17.1566   7
  -1  -1  23 56.8675 12.1619  35
  -1  -1  23 59.2221 13.0695  27
   1   1 -22 13.8934 13.4512  21
  -1  -1  22 5.82288 13.6351  27
  -1  -1  22 5.02298 12.0326  35
  -1  -1  22 19.5823 16.8373   7
  -1  -1  21 183.595 20.6305  35
  -1  -1  21 141.035 20.9456  27
  -1  -1  21 151.165 24.5301   7
  -1  -1  20-12.8353 18.2467   7
  -1  -1  20-8.27459 16.2464  27
  -1  -1  20-4.60803 14.5627  35
  -1  -1  20 13.7167 13.2803  11
  -1  -1  19 7.57901 18.0872   7
  -1  -1  19 13.1174 14.9160  35
  -1  -1  19 13.2041 16.4132  27
  -1  -1  19 19.8181 13.9411  11
  -1  -1  18 167.704 20.5974  29
  -1  -1  18 273.992 29.6070   7
  -1  -1  18 187.901 24.5562  27
  -1  -1  18 269.522 24.3749  35
  -1  -1  18 226.183 23.4775  11
  -1  -1  17 5.34102 11.2178  29
  -1  -1  17 9.73790 14.2953  11
  -1  -1  17 19.4517 14.6090  35
  -1  -1  17 17.3316 17.0560   7
  -1  -1  17-17.9660 14.3772  18
  -1  -1  17-10.4396 16.0634  27
  -1  -1  16 327.636 30.9020  29
  -1  -1  16 381.893 32.8464  35
  -1  -1  16 397.064 31.9209  18
  -1  -1  16 427.753 33.5793  27
  -1  -1  16 375.929 32.5365  11
  -1  -1  16 393.107 36.3010   7
  -1  -1  15 95.6471 19.6825   7
  -1  -1  15 95.6124 16.0220  27
  -1  -1  15 109.869 14.9712  18
  -1  -1  15 88.3024 15.5897  35
  -1  -1  15 131.589 18.9734   8
  -1  -1  15 89.6696 13.5971  29
  -1  -1  15 96.0285 15.8351  11
  -1  -1  14 0.80348 11.0597  27
  -1  -1  14-6.31989 10.0488  18
  -1  -1  14-0.67571 12.6824  11
  -1  -1  14 9.25096 9.04286  29
  -1  -1  14-2.84926 11.5352  35
  -1  -1  14 15.7769 13.2417   8
  -1  -1  14-3.93493 14.3614   7
  -1  -1  13 1272.48 84.0423   8
  -1  -1  13 1464.18 85.4738   7
  -1  -1  13 1323.17 81.8260  18
  -1  -1  13 1189.24 82.2123  27
  -1  -1  13 1161.35 82.2128  35
  -1  -1  13 1048.24 80.8016  34
  -1  -1  13 1140.04 81.9083  11
  -1  -1  13 993.998 80.9926  29
  -1  -1  12 2.48367 8.29358  18
  -1  -1  12 0.80628 12.5313   8
  -1  -1  12 5.86395 8.92583  27
  -1  -1  12 19.4768 13.1537   7
   1   1 -12-3.92311 22.1121   4
   1   1 -12 23.2518 16.9667   2
  -1  -1  12 5.40358 8.35390  35
   1   1 -11 675.805 63.5319   2
   1   1 -11 827.337 64.5891   3
   1   1 -11 730.112 62.6590   1
   1   1 -11 706.116 68.9051   4
   1   1 -10 614.098 56.3954   2
   1   1 -10 659.101 55.6351   3
   1   1 -10 630.250 60.3226   4
   1   1  -9 5.49160 15.9345   2
   1   1  -9 5.15309 16.9181   4
  -1  -1   9 12.8074 14.0191   2
   1   1  -9 6.50344 15.7256   3
  -1  -1   8 5555.22 407.908   2
   1   1  -8 6161.88 407.289   3
   1   1  -8 6295.24 409.549   2
   1   1  -7 17.7234 11.4364   1
   1   1  -7 27.5761 15.8103   2
  -1  -1   7 20.2103 15.0143   2
   1   1  -7 5.51290 12.3708   3
   1   1  -6 859.443 62.4242   1
  -1  -1   6 737.810 63.0779   2
   1   1  -6 868.625 62.2017   3
   1   1  -5 7321.34 503.075   1
  -1  -1   5 7726.49 504.761   2
   1   1  -5 7500.09 503.232   3
   1   1  -4 273.863 22.6266   3
  -1  -1   4 210.598 21.6992   3
   1   1  -4 278.059 22.3064   1
  -1  -1   4 177.300 24.3347   2
   1   1  -3 26462.9 1861.01   2
   1   1  -3 27172.7 1860.05   1
  -1  -1   3 27330.0 1860.34   3
   1   1  -3 28697.6 1860.34   3
  -1  -1   3 30738.2 1861.57   2
   1   1  -2 928.739 63.7754   3
   1   1  -2 888.185 63.7026   1
  -1  -1   2 940.429 63.8211   3
   1   1  -1 4890.61 305.047   1
   1   1  -1 4417.03 304.514   4
   1   1  -1 4869.28 305.022   3
  -1  -1   1 4210.24 304.771   3
   1   1   2 21060.7 1420.66   5
  -1  -1  -2 19473.2 1420.64   5
  -1  -1  -2 21092.9 1420.57   2
   1   1   2 22537.3 1420.79   2
   1   1   2 24157.8 1422.25   4
   1   1   3 192.203 17.0938   2
  -1  -1  -3 173.374 14.9080   5
   1   1   4 1159.17 75.1733   2
   1   1   4 937.101 72.3552   5
  -1  -1  -4 1084.41 72.9835   5
  -1  -1  -4 1151.98 74.4268   3
  -1  -1  -5 18103.9 1247.88   5
  -1  -1  -5 18540.9 1249.58   3
   1   1   5 18998.3 1250.33   2
   1   1   5 19366.2 1247.71   5
   1   1   6 39.0204 8.26900   5
   1   1   6 25.6409 14.0733   2
  -1  -1  -6 22.6496 14.6024   2
  -1  -1  -6 20.6978 12.3283   3
  -1  -1  -6 27.2328 9.43457   5
  -1  -1  -7 2731.61 193.378   3
  -1  -1  -7 2718.24 190.633   5
   1   1   7 2688.87 194.174   2
  -1  -1  -7 3235.31 195.068   2
   1   1   8 209.123 25.6534   2
  -1  -1  -8 254.945 24.3712   1
  -1  -1  -8 202.078 28.7993   4
  -1  -1  -8 230.567 25.3294   2
  -1  -1  -8 195.420 24.1519   3
  -1  -1  -9 188.443 24.0550   2
  -1  -1  -9 197.403 29.2008   4
  -1  -1  -9 212.292 23.6872   1
   1   1   9 159.457 23.6250   2
   1   1  10 1486.41 105.489   6
  -1  -1 -10 1468.69 118.793   4
   1   1  10 1459.61 113.830   2
  -1  -1 -10 1748.12 114.870   2
  -1  -1 -10 1658.44 113.046   1
   1   1  11 157.122 15.0383   6
  -1  -1 -11 170.824 25.0621   2
  -1  -1 -11 220.765 33.4892   4
  -1  -1 -11 230.094 26.4608   1
   1   1  11 175.950 25.2975   2
  -1  -1 -12 2355.34 117.509   1
  -1  -1 -12 2401.91 118.968   2
   1   1  12 1959.72 117.178   2
  -1  -1 -12 1943.50 126.557   4
  -1  -1 -13 204.015 29.2953   2
   1   1  13 226.797 20.6122  35
   1   1  13 195.011 29.9844   2
   1   1  13 237.596 20.1464  18
   1   1  13 261.994 23.6484   8
   1   1  14 204.809 17.9627  18
   1   1  14 155.555 17.7371  35
   1   1  15 3974.93 276.579  11
   1   1  15 4305.57 277.863  35
   1   1  16 10.6237 12.5650  11
   1   1  16 26.0129 11.6943  35
   1   1  17 391.710 31.5098  35
   1   1  17 338.962 30.3973  11
   1   1  18 47.4483 14.2828  11
   1   1  18 66.5548 15.1800  35
   1   1  19 13.1030 13.8675  35
   1   1  19 7.47512 13.5981  11
   1   1  20 94.9224 16.5242  35
  -1  -1 -21 5.54844 15.9637  21
   1   1  21-4.31574 13.0582  35
   1   1  22 16.3127 12.7627  35
  -1  -1 -22 24.1451 15.8323  21
   1   1  23 33.9832 11.6206  35
  -1  -1 -23 18.6778 14.2053  21
  -1  -1 -24 16.8286 11.8372  21
   1   1  24-5.44044 9.05804  35
   1   1  25 34.5206 17.1114   7
  -1  -1 -25 43.6030 11.2377  21
   1   1  25 62.7656 8.26908  35
  -1  -2  24 13.2202 6.63854  35
  -1  -2  24 30.3061 13.4439   7
   1   2 -24 21.7223 8.97376  21
   1   2 -23 15.6169 11.3336  21
  -1  -2  23 27.2935 14.3525   7
  -1  -2  23 0.25950 9.41486  35
  -1  -2  23 8.17577 10.9920  27
  -1  -2  22 13.0258 11.7385  35
  -1  -2  22 11.3481 13.3874  27
  -1  -2  22 33.9794 15.6508   7
   1   2 -22 7.47719 12.8632  21
  -1  -2  21 2.08162 17.6073   7
  -1  -2  21-12.8433 15.3633  27
  -1  -2  21 9.55768 13.1873  35
  -1  -2  20 8.63505 13.6478  11
  -1  -2  20-0.73242 16.7456   7
  -1  -2  20-4.02230 14.0101  35
  -1  -2  20 0.47364 15.6006  27
  -1  -2  19-9.00797 16.5476  27
  -1  -2  19 13.6784 18.1156   7
  -1  -2  19 33.0504 14.3599  11
  -1  -2  19 18.2125 14.6519  35
  -1  -2  18 6.60969 16.1170  27
  -1  -2  18 22.4004 14.3388  11
  -1  -2  18 30.6994 18.2911   7
  -1  -2  18 59.5837 15.8086  35
  -1  -2  17 262.669 29.1104   7
  -1  -2  17 256.207 25.2127  35
  -1  -2  17 262.548 24.3237  18
  -1  -2  17 214.228 23.7879  11
  -1  -2  17 299.373 25.6022  27
  -1  -2  16 30.5855 16.4737   8
  -1  -2  16 41.0864 14.5917  27
  -1  -2  16-27.5601 13.9140  18
  -1  -2  16 23.2158 14.1853  35
  -1  -2  16 24.1238 10.4998  29
  -1  -2  16 10.3338 16.8541   7
  -1  -2  16-7.55521 14.2677  11
  -1  -2  15 49.5810 13.6998  27
  -1  -2  15 18.9670 15.9174   7
  -1  -2  15 28.9274 11.6658  18
  -1  -2  15 40.5346 10.7313  29
  -1  -2  15 37.5895 13.3243  35
  -1  -2  15 34.1408 15.4910   8
  -1  -2  15 27.0324 13.9082  11
  -1  -2  14 224.155 24.0981  29
  -1  -2  14 308.609 26.0724  27
  -1  -2  14 358.750 25.4966  18
  -1  -2  14 287.500 27.9775   8
  -1  -2  14 263.023 25.8728  35
  -1  -2  14 377.301 30.1023   7
  -1  -2  14 264.943 26.0400  11
  -1  -2  13 11.5790 10.7862  27
  -1  -2  13 0.30904 9.35548  18
  -1  -2  13 4.99076 10.1322  35
  -1  -2  13 11.2578 9.19098  34
  -1  -2  13 5.25028 14.3632   7
  -1  -2  13 18.1021 14.0297   8
  -1  -2  13 5.53161 8.46472  29
   1   2 -12 234.380 33.1402   2
   1   2 -12 254.372 35.0603   4
  -1  -2  12 255.338 21.8371  27
  -1  -2  12 267.518 24.4302   8
   1   2 -12 191.086 37.7073   4
  -1  -2  12 233.794 20.8322  34
  -1  -2  12 232.364 21.8118  35
  -1  -2  12 246.150 21.0443  18
  -1  -2  12 259.673 25.3340   7
   1   2 -11 181.970 27.6359   2
   1   2 -11 210.495 27.6821   1
   1   2 -11 169.874 32.9380   4
   1   2 -11 191.413 28.6020   3
   1   2 -11 179.801 28.8261   4
   1   2 -10 1144.56 93.8277   2
   1   2 -10 1209.89 94.1851   4
   1   2 -10 1222.42 93.1457   3
   1   2 -10 1219.18 92.0178   1
   1   2 -10 1194.92 98.2657   4
   1   2  -9 1616.00 117.178   3
   1   2  -9 1582.87 117.975   4
  -1  -2   9 1527.51 117.692   3
   1   2  -9 1643.77 118.978   2
  -1  -2   8 50.0844 16.9241   3
   1   2  -8 72.0143 18.8408   2
   1   2  -8 95.1241 17.9593   3
   1   2  -7 1389.98 101.882   3
   1   2  -7 1421.30 103.683   2
   1   2  -6 70.3980 17.8496   2
   1   2  -6 70.4995 14.5370   3
   1   2  -6 57.1425 13.8860   1
   1   2  -5 8953.32 553.181   2
  -1  -2   5 7794.31 546.557   6
   1   2  -5 9009.48 552.057   3
   1   2  -5 9325.03 551.705   1
   1   2  -4 11287.8 749.584   3
   1   2  -4 10375.4 749.597   4
   1   2  -4 11202.0 749.215   1
  -1  -2   4 11431.1 745.842   6
  -1  -2   4 11130.2 749.593   1
   1   2  -3 866.373 59.8259   4
  -1  -2   3 918.124 56.6944   6
   1   2  -3 680.328 59.0253   3
   1   2  -3 727.327 59.0650   1
   1   2  -2 16.5370 7.88393   3
   1   2  -2 22.5961 8.34292   4
   1   2  -2 6.07705 7.38607   1
   1   2  -1 6168.31 427.377   3
   1   2  -1 6684.19 426.468   6
   1   2  -1 6383.68 427.167   1
   1   2  -1 6196.66 427.431   4
   1   2   0 4250.83 279.156   1
   1   2   0 4296.55 278.793   6
   1   2   0 3973.18 279.264   3
   1   2   0 4137.60 279.774   4
   1   2   1 8415.34 542.450   4
   1   2   1 8934.12 541.400   2
   1   2   1 7930.39 541.332   1
   1   2   1 7661.98 541.492   3
  -1  -2  -1 7659.77 542.068   4
  -1  -2  -2 2027.92 140.266   4
  -1  -2  -2 2082.62 139.072   1
   1   2   2 1928.45 140.122   4
   1   2   2 2147.00 139.118   2
  -1  -2  -3 1326.52 91.0225   5
  -1  -2  -3 1401.20 92.0443   2
   1   2   3 1382.98 92.2452   2
   1   2   3 1203.00 93.1901   4
   1   2   4 679.735 50.5535   4
  -1  -2  -4 644.541 46.3941   5
   1   2   4 654.811 49.0932   2
  -1  -2  -5 754.349 52.5277   5
   1   2   5 700.057 56.3627   2
   1   2   6 11410.9 757.531   2
  -1  -2  -6 11302.6 756.552   3
  -1  -2  -6 11258.6 754.170   5
  -1  -2  -7 540.372 44.1413   2
   1   2   7 577.725 45.1494   2
  -1  -2  -7 477.789 39.4391   5
  -1  -2  -7 564.772 43.2455   3
  -1  -2  -8 17.6663 9.43782   5
  -1  -2  -8 15.4232 15.6478   2
  -1  -2  -8 7.14199 13.0924   3
   1   2   8 12.2534 14.6037   2
  -1  -2  -9 867.188 66.9470   5
  -1  -2  -9 872.659 76.4323   4
  -1  -2  -9 981.739 72.4897   3
  -1  -2  -9 1114.05 73.8869   2
   1   2   9 931.508 65.6218   6
   1   2   9 908.112 72.9373   2
  -1  -2 -10 968.777 68.9336   2
   1   2  10 793.180 59.4794   6
  -1  -2 -10 849.451 67.2535   3
  -1  -2 -10 932.282 67.4405   1
  -1  -2 -10 765.662 72.1263   4
   1   2  10 849.000 68.9393   2
  -1  -2 -11 86.3602 19.6301   1
  -1  -2 -11 109.249 20.7873   2
   1   2  11 60.4197 18.2191   2
  -1  -2 -11 55.7381 19.2365   3
   1   2  11 63.7004 9.88769   6
  -1  -2 -11 112.871 26.1253   4
  -1  -2 -12-7.48296 15.8063   2
  -1  -2 -12 7.55646 22.1322   4
  -1  -2 -12 1.11888 17.0486   1
   1   2  12 10.8302 15.0824   2
   1   2  13 59.8071 10.1389  18
  -1  -2 -13 57.0198 18.9949   2
   1   2  13 39.3486 17.2543   2
  -1  -2 -13 55.3538 26.8624   4
   1   2  14 2326.65 158.745  35
   1   2  15 1013.07 72.3388  35
   1   2  16 119.052 16.4812  35
   1   2  17 76.9631 16.1752  11
   1   2  17 104.707 16.4746  35
   1   2  18 104.224 16.7670  35
   1   2  18 81.7589 15.3418  11
   1   2  19 39.6224 15.2333  35
  -1  -2 -20 23.9692 16.5353  21
   1   2  20 34.0054 14.9679  35
  -1  -2 -21 17.5946 15.9315  21
   1   2  21 22.1881 13.9752  35
  -1  -2 -22 68.4692 17.3965  21
   1   2  22 63.9944 15.1155  35
   1   2  23-1.05061 11.6358  35
   1   2  23 3.84263 16.4561   7
  -1  -2 -23-6.58980 13.8462  21
  -1  -2 -24 103.587 15.3771  21
   1   2  24 73.3939 12.3831  35
   1   2  24 63.0863 20.3345   7
   1   2  25 19.8887 7.48914  35
   1   2  25-8.45263 15.9440   7
  -1  -2 -25 5.34695 10.1012  21
  -1  -3  24 11.9540 5.14966  35
   1   3 -24 26.5589 8.66754  21
  -1  -3  23 17.1048 13.9938   7
  -1  -3  23 12.9106 9.92538  27
  -1  -3  23 5.59895 8.16625  35
   1   3 -23-4.78712 10.7636  21
  -1  -3  22 6.68190 10.0857  35
  -1  -3  22 19.0777 12.0788  27
   1   3 -22-6.07887 12.8966  21
  -1  -3  22 2.33172 15.7715   7
  -1  -3  21 112.108 18.2096  27
  -1  -3  21 78.0061 20.7930   7
  -1  -3  21 109.599 16.2832  11
  -1  -3  21 134.690 16.7598  35
  -1  -3  20-1.46742 13.0232  11
  -1  -3  20 4.57191 15.4593  27
  -1  -3  20 0.72010 17.9387   7
  -1  -3  20 5.15356 13.5629  35
  -1  -3  19 126.004 20.0223  27
  -1  -3  19 113.605 17.8560  35
  -1  -3  19 61.0345 19.9167   7
  -1  -3  19 75.8713 16.6144  11
  -1  -3  18 19.1815 15.9908  27
  -1  -3  18 15.8094 14.0020  11
  -1  -3  18 40.1162 14.9409  35
  -1  -3  17 3.44445 14.6895  35
  -1  -3  17 8.76906 13.9148  11
  -1  -3  17 25.0817 15.2305  27
  -1  -3  17 3.51445 12.2280  18
  -1  -3  17-5.37536 12.4456  29
  -1  -3  16 18.6231 10.4931  29
  -1  -3  16-21.9739 15.5785  11
  -1  -3  16 16.9427 14.0294  27
  -1  -3  16-15.2908 15.9908  23
  -1  -3  16 20.9474 12.5195  18
  -1  -3  16 29.3947 13.5093  35
  -1  -3  15 15.5930 12.9035  35
  -1  -3  15 29.0127 14.2630  11
  -1  -3  15 41.3460 12.4300  18
  -1  -3  15 2.28128 13.5744  27
  -1  -3  15 13.6280 13.2481  23
  -1  -3  15 28.9992 11.2454  29
  -1  -3  14 46.9821 13.2528  35
  -1  -3  14 34.2502 11.0369  29
  -1  -3  14 53.3133 11.7299  18
  -1  -3  14 59.1243 13.9488  27
  -1  -3  14 64.3296 13.4363  23
  -1  -3  13 6.71064 9.96652  34
  -1  -3  13 3.97658 10.8429  35
  -1  -3  13-0.34986 10.7052  23
  -1  -3  13 2.70363 10.7869  27
  -1  -3  13-3.13355 9.83242  18
  -1  -3  13 8.79364 9.52567  29
  -1  -3  12 53.7251 10.8511  34
  -1  -3  12 70.6921 15.4892   8
  -1  -3  12 68.8762 12.2426  27
  -1  -3  12 55.0962 11.7819  35
  -1  -3  12 63.9001 11.9769  23
  -1  -3  12 52.8109 10.3309  29
  -1  -3  12 63.7686 10.9905  18
  -1  -3  11 604.118 48.8212   8
   1   3 -11 570.454 59.0818   4
   1   3 -11 556.385 57.2256   2
   1   3 -11 654.799 65.1925   4
  -1  -3  11 754.717 47.6860  23
  -1  -3  11 608.001 47.3176  35
  -1  -3  11 668.539 47.4432  27
   1   3 -10 37.9410 18.3955   4
  -1  -3  10 13.7808 17.5581   3
   1   3 -10 23.1106 15.4511   1
   1   3 -10 30.7033 18.5895   3
   1   3 -10 37.9755 17.5772   2
   1   3  -9 2818.00 193.301   1
   1   3  -9 2595.98 194.883   2
   1   3  -9 2708.91 195.345   4
  -1  -3   9 2745.47 195.159   3
   1   3  -9 2833.43 194.460   3
   1   3  -8 128.554 23.2946   4
   1   3  -8 177.316 24.3496   2
  -1  -3   8 134.970 22.6473   3
   1   3  -8 187.846 24.5756   3
   1   3  -7 19.5869 13.6705   3
  -1  -3   7 28.8710 5.18092   5
   1   3  -7 25.6900 16.0831   2
   1   3  -7 23.2673 15.3712   4
  -1  -3   7 28.8089 13.7523   3
  -1  -3   7 25.8683 4.79368   6
  -1  -3   6 138.385 20.2238   1
   1   3  -6 159.740 21.1722   2
   1   3  -6 161.167 20.7194   3
  -1  -3   6 147.507 12.7584   6
   1   3  -6 176.861 21.4682   4
   1   3  -5 1380.46 101.085   3
  -1  -3   5 1422.07 96.5483   6
   1   3  -5 1417.56 101.818   4
   1   3  -5 1470.57 102.572   2
   1   3  -4 2966.29 196.416   3
   1   3  -4 2452.64 194.992   1
  -1  -3   4 3001.99 192.789   6
   1   3  -4 2892.02 196.793   4
   1   3  -4 2969.72 197.126   2
   1   3  -3 628.549 48.1836   1
   1   3  -3 639.225 48.6804   3
   1   3  -3 637.041 49.2828   4
  -1  -3   3 633.128 48.4726   1
  -1  -3   3 685.780 45.8732   6
   1   3  -2 3765.50 253.412   3
   1   3  -2 3544.98 253.656   4
   1   3  -2 3529.40 252.698   1
  -1  -3   2 3846.78 253.182   1
  -1  -3   2 3965.89 251.659   6
   1   3  -1 28068.4 1909.37   3
   1   3  -1 29109.7 1909.04   1
   1   3  -1 28962.3 1910.04   4
   1   3   0 196.201 16.6680   6
   1   3   0 189.033 17.6941   3
   1   3   0 227.337 19.0067   4
   1   3   0 214.148 17.2978   1
  -1  -3  -1 2367.45 190.133   4
  -1  -3  -1 2952.46 189.159   2
  -1  -3  -1 2753.90 188.782   6
   1   3   1 2844.89 190.681   4
   1   3   1 2879.61 189.180   1
   1   3   1 3031.78 189.115   2
   1   3   1 2724.38 189.515   3
  -1  -3  -2 2237.58 159.026   4
   1   3   2 2233.06 157.519   1
   1   3   2 2453.88 157.626   2
   1   3   2 2382.27 159.532   4
   1   3   3 6597.33 436.038   2
   1   3   3 6387.21 437.785   4
   1   3   4 8282.61 599.740   4
   1   3   4 9456.47 598.398   2
  -1  -3  -5 516.857 42.9186   2
  -1  -3  -5 549.336 39.5666   5
   1   3   5 477.894 43.5523   4
   1   3   5 610.673 43.2822   2
   1   3   5 524.656 38.9463   6
   1   3   6 14583.5 955.907   2
   1   3   6 13846.6 951.853   6
  -1  -3  -6 14679.5 952.540   5
   1   3   7 851.438 66.8353   2
  -1  -3  -7 880.536 62.1914   5
   1   3   7 861.599 61.3101   6
  -1  -3  -8 197.831 27.0105   2
   1   3   8 251.362 21.7998   6
  -1  -3  -8 289.103 23.3705   5
   1   3   8 217.454 28.3054   2
  -1  -3  -8 310.489 28.0644   3
   1   3   9 3251.13 224.322   6
  -1  -3  -9 3608.59 230.986   3
  -1  -3  -9 3243.99 225.512   5
  -1  -3  -9 3768.06 232.268   2
   1   3   9 3285.67 231.698   2
  -1  -3  -9 2947.38 233.540   4
  -1  -3 -10 258.920 24.8703   5
  -1  -3 -10 280.146 31.7349   2
  -1  -3 -10 259.222 35.7436   4
   1   3  10 272.926 23.0642   6
  -1  -3 -10 292.587 30.7812   3
   1   3  10 281.188 32.2676   2
  -1  -3 -11 382.711 36.7962   2
  -1  -3 -11 346.420 35.3919   3
  -1  -3 -11 271.039 38.8846   4
   1   3  11 275.079 24.9982   6
  -1  -3 -11 276.318 26.9413   5
  -1  -3 -11 367.101 34.7098   1
   1   3  11 346.340 36.4173   2
  -1  -3 -12 2875.54 194.039   1
  -1  -3 -12 2533.59 200.466   4
  -1  -3 -12 2905.98 195.042   3
   1   3  12 2454.91 194.651   2
  -1  -3 -12 2744.39 194.488   2
  -1  -3 -13 10.4550 23.1761   4
   1   3  13 12.5123 15.9521   2
   1   3  13 15.8548 9.27475  35
   1   3  13 10.9839 15.1232   7
  -1  -3 -13 15.4667 15.6920   2
   1   3  14 3732.54 268.172  35
   1   3  14 4430.85 271.423   7
   1   3  15 993.062 71.4092   7
   1   3  15 916.024 67.5075  35
   1   3  16 258.279 25.3404  35
   1   3  16 304.841 30.8949   7
   1   3  17 1361.81 94.8329  35
   1   3  17 1305.26 98.2526   7
   1   3  18 110.507 17.8713  35
   1   3  18 114.835 23.4959   7
   1   3  19 75.4708 16.3907  35
  -1  -3 -19 79.1010 18.5418  21
   1   3  19 70.9572 22.1808   7
   1   3  20-0.87123 17.9904   7
  -1  -3 -20-20.6189 16.5512  21
   1   3  20 14.1511 14.9734  35
   1   3  21 67.0186 15.7078  35
   1   3  21 14.8252 19.3259   7
  -1  -3 -21 68.4950 17.8758  21
   1   3  22 106.478 16.5404  35
  -1  -3 -22 79.9867 17.2705  21
  -1  -3 -23-4.55085 13.7460  21
   1   3  23-0.73319 12.5221  35
   1   3  23-0.80444 18.3152   7
  -1  -3 -24 26.4588 12.8302  21
   1   3  24 2.82561 17.6777   7
   1   3  24 40.5319 11.4346  35
   1   3  25 7.77004 6.59921  13
   1   3  25 10.5145 7.99372  35
  -1  -3 -26 0.18770 7.42265  21
   1   3  26-0.69848 4.97903  35
  -1  -4  23 7.11923 12.7917   7
  -1  -4  23 0.23080 8.51026  27
  -1  -4  23 0.71882 6.50792  35
   1   4 -23-13.6576 10.1144  21
   1   4 -22 35.3488 12.7521  21
  -1  -4  22 15.2196 9.41313  35
  -1  -4  22 4.36872 15.8356   7
  -1  -4  22 11.5194 11.3234  27
  -1  -4  21 21.2090 11.8771  35
  -1  -4  21 32.3535 13.7172  27
  -1  -4  21 44.6973 12.8254  11
  -1  -4  20 113.665 19.1346  27
  -1  -4  20 105.662 16.7830  11
  -1  -4  20 134.046 17.6374  35
  -1  -4  19 2.25440 13.8261  35
  -1  -4  19 1.43058 15.1140  27
  -1  -4  19-5.49630 13.7982  11
  -1  -4  18-14.1014 14.3320  11
  -1  -4  18-20.4372 15.4049  27
  -1  -4  18-32.1904 14.5207  35
  -1  -4  17 20.2457 14.6810  11
  -1  -4  17 35.9557 15.4186  35
  -1  -4  17 15.5710 15.8605  27
  -1  -4  16-35.5191 16.8752  23
  -1  -4  16-30.3342 15.0337  11
  -1  -4  16 17.4939 11.0418  29
  -1  -4  16-0.49002 13.7509  27
  -1  -4  16-5.35335 13.8830  35
  -1  -4  16 5.62948 11.4596  18
  -1  -4  15 291.214 26.9035  27
  -1  -4  15 268.115 26.6555  23
  -1  -4  15 279.694 26.8109  35
  -1  -4  15 226.170 23.9622  29
  -1  -4  15 328.427 25.2145  18
  -1  -4  14 2.04545 10.0763  18
  -1  -4  14 3.34245 9.24189  29
  -1  -4  14 26.4983 12.8165  25
  -1  -4  14 4.35356 11.8430  27
  -1  -4  14 8.85841 11.8084  35
  -1  -4  14 4.73045 11.8607  23
  -1  -4  13 3.53247 11.5217  25
  -1  -4  13 2.00582 10.6426  27
  -1  -4  13-4.11720 9.39772  18
  -1  -4  13 3.62002 10.5892  23
  -1  -4  13-4.54457 10.9831  35
  -1  -4  13 3.24564 10.7363  34
  -1  -4  13-7.35590 9.67066  29
  -1  -4  12 465.135 34.7451  27
  -1  -4  12 368.022 33.4490  34
  -1  -4  12 418.719 35.4528  25
  -1  -4  12 495.645 33.8131  18
  -1  -4  12 445.554 34.1616  23
  -1  -4  12 432.619 34.7039  35
   1   4 -11 54.2256 19.0917   2
  -1  -4  11 84.8188 11.5140  23
  -1  -4  11 79.0192 11.8882  34
  -1  -4  11 79.6182 10.8611  18
  -1  -4  11 63.2916 11.9545  27
   1   4 -11 53.2861 22.8473   4
  -1  -4  11 65.4861 11.5658  35
   1   4 -10 40.2810 18.6768   3
   1   4 -10 22.8938 18.2464   4
   1   4 -10 37.6800 18.0013   2
   1   4 -10 34.8501 16.8715   1
  -1  -4  10 16.0559 18.4033   3
   1   4  -9 93.8478 20.0478   2
   1   4  -9 99.2282 19.2407   1
   1   4  -9 65.6249 20.0969   4
   1   4  -9 91.1723 21.2389   3
  -1  -4   9 89.5682 21.3531   3
  -1  -4   8 12.7645 5.65992   5
   1   4  -8 2.93224 15.9076   3
   1   4  -8 20.2027 15.2755   2
   1   4  -8 3.32377 16.2493   4
  -1  -4   8 5.15764 15.8338   3
   1   4  -8 14.4186 14.3316   1
  -1  -4   7 1227.71 94.6883   5
   1   4  -7 1422.28 102.808   4
  -1  -4   7 1432.83 102.399   3
  -1  -4   7 1491.82 101.764   1
  -1  -4   7 1323.54 93.7955   6
   1   4  -7 1515.66 103.075   2
   1   4  -7 1533.40 102.306   3
   1   4  -7 1476.39 100.530   1
  -1  -4   6 17.8538 7.49237   6
   1   4  -6 28.9692 14.8585   2
  -1  -4   6 24.1935 13.2983   1
   1   4  -6 27.5483 13.4929   3
   1   4  -6 32.0673 14.5026   4
   1   4  -5 3194.65 219.352   3
  -1  -4   5 3243.20 215.133   6
   1   4  -5 3055.36 219.597   2
   1   4  -5 3144.49 220.458   4
  -1  -4   5 3243.50 219.158   1
   1   4  -4 274.895 28.2127   4
   1   4  -4 277.655 27.4653   3
  -1  -4   4 288.875 23.4884   6
  -1  -4   4 319.728 27.2954   1
   1   4  -4 313.462 29.1984   2
   1   4  -3 137.969 18.8419   4
   1   4  -3 139.799 17.7539   3
  -1  -4   3 167.106 14.5598   6
  -1  -4   3 107.121 16.4724   1
  -1  -4   2 51366.8 3200.49   6
   1   4  -2 46700.8 3201.93   3
  -1  -4   2 51000.1 3201.72   1
   1   4  -2 47101.6 3203.01   4
   1   4  -2 43931.6 3201.01   1
   1   4  -1 505.237 40.0367   1
   1   4  -1 556.386 41.2108   3
  -1  -4   1 510.126 39.9874   1
   1   4  -1 630.159 43.0091   4
   1   4   0 772.740 55.2837   1
  -1  -4   0 746.375 55.1355   1
   1   4   0 802.628 56.1237   3
   1   4   0 795.465 57.7206   4
  -1  -4  -1 315.445 29.4042   4
   1   4   1 365.202 27.5597   1
   1   4   1 378.343 30.6468   4
   1   4   1 341.174 28.2717   3
  -1  -4  -1 344.535 27.0773   6
   1   4   2 3606.46 258.992   4
   1   4   2 3610.98 256.710   1
  -1  -4  -2 3981.90 259.131   4
  -1  -4  -2 4106.17 256.792   2
  -1  -4  -2 3754.85 256.262   6
   1   4   2 3817.92 256.662   2
   1   4   3 38747.0 2428.66   4
   1   4   3 39123.3 2425.98   2
   1   4   3 33781.6 2424.52   6
   1   4   4 904.865 63.4718   2
   1   4   4 803.397 65.3743   4
   1   4   5 3011.93 212.590   6
   1   4   5 3348.42 215.856   2
   1   4   5 3240.01 218.273   4
   1   4   6 6571.44 458.219   6
   1   4   6 6852.62 461.919   2
   1   4   6 7089.07 465.022   4
  -1  -4  -6 7070.61 458.948   5
   1   4   7 1722.64 121.753   2
   1   4   7 1596.80 116.345   6
   1   4   7 1995.10 126.147   4
  -1  -4  -7 1689.59 117.141   5
   1   4   8 2145.07 147.970   6
  -1  -4  -8 2163.28 148.703   5
   1   4   8 2199.92 154.018   2
  -1  -4  -9 747.021 67.0278   4
   1   4   9 790.134 57.6014   6
  -1  -4  -9 839.889 63.3622   3
  -1  -4  -9 777.226 58.5333   5
   1   4   9 810.974 65.4223   2
   1   4  10 2235.62 156.076   2
  -1  -4 -10 2123.81 148.211   5
  -1  -4 -10 1957.89 157.419   4
  -1  -4 -10 2286.03 154.879   2
   1   4  10 2026.15 146.885   6
  -1  -4 -10 2403.09 154.734   3
  -1  -4 -11 2434.31 156.892   2
  -1  -4 -11 1980.92 147.985   5
   1   4  11 2070.92 156.339   2
  -1  -4 -11 2391.23 156.047   3
  -1  -4 -11 2013.62 160.171   4
   1   4  12 252.227 34.7689   2
  -1  -4 -12 309.340 34.9268   2
  -1  -4 -12 277.090 34.2224   3
  -1  -4 -12 275.836 40.3726   4
  -1  -4 -12 333.420 35.1300   1
  -1  -4 -13 3556.55 302.236   4
   1   4  13 4252.31 285.700  35
   1   4  13 3378.87 296.390   2
   1   4  13 4095.46 285.689  27
  -1  -4 -13 3898.25 296.665   2
   1   4  14 117.673 15.0619  35
   1   4  14 141.430 21.1413   7
   1   4  15 13.2100 10.5218  35
   1   4  15 11.8856 16.3921   7
   1   4  16 1070.31 80.2290  35
   1   4  16 1248.39 84.8979   7
  -1  -4 -17 240.677 24.1172  21
   1   4  17 232.239 28.9305   7
   1   4  17 220.101 23.4844  35
  -1  -4 -18 1519.80 113.613  21
   1   4  18 1639.69 113.418  35
   1   4  18 1756.85 118.437   7
  -1  -4 -19 13.6826 15.2529  21
   1   4  19-0.47818 14.8063  35
   1   4  19 29.2500 20.0095   7
  -1  -4 -20 29.0504 16.6495  21
   1   4  20 49.9526 21.4273   7
   1   4  20 37.1894 15.4072  35
   1   4  21 30.8103 14.7958  35
   1   4  21 53.8325 21.9690   7
  -1  -4 -21 9.88173 14.7898  21
  -1  -4 -22 13.3935 15.0340  21
   1   4  22 10.2553 13.4132  35
   1   4  22-7.82978 18.7816   7
   1   4  23-6.68958 19.5315   7
   1   4  23 7.95082 12.8195  35
  -1  -4 -23 28.8791 14.5485  21
   1   4  24 25.4331 11.1314  35
  -1  -4 -24-0.34856 12.2859  21
   1   4  24 7.36959 18.2904   7
   1   4  25 0.77842 7.19449  13
  -1  -4 -25-12.6454 10.5464  21
   1   4  25 5.70046 8.60745  35
   1   4  26 13.5248 6.28963  35
  -1  -4 -26 21.2979 8.07019  21
   1   5 -23-4.80650 8.61882  21
  -1  -5  23 13.3641 11.7598   7
  -1  -5  23-4.82554 7.23497  27
  -1  -5  22 30.2093 8.70994  35
   1   5 -22 40.7476 12.4223  21
  -1  -5  22 45.0316 11.0844  27
  -1  -5  21 2.42851 10.3620  35
  -1  -5  21-9.47618 12.2768  27
  -1  -5  21 4.50431 10.9861  11
  -1  -5  20 69.5403 14.1801  35
  -1  -5  20 54.0340 16.6849  27
  -1  -5  20 64.2652 14.6598  11
  -1  -5  19 5.34718 13.4548  11
  -1  -5  19 19.2690 13.3700  35
  -1  -5  19 29.3996 15.6812  27
  -1  -5  18-8.61639 13.9091  11
  -1  -5  18 14.9255 13.6437  35
  -1  -5  18-0.97737 16.0312  27
  -1  -5  17 16.5602 13.8191  35
  -1  -5  17-8.49891 15.3933  27
  -1  -5  17 5.50545 13.7733  11
  -1  -5  16-16.9174 15.0275  11
  -1  -5  16-26.7462 15.5748  27
  -1  -5  16-3.92810 14.1804  35
  -1  -5  16 1.45913 11.3430  18
  -1  -5  15-2.38513 13.5440  27
  -1  -5  15-11.6242 14.0013  23
  -1  -5  15 18.8569 13.4912  25
  -1  -5  15 24.4008 13.5349  35
  -1  -5  15 7.07962 10.4084  29
  -1  -5  15 17.8043 11.3105  18
  -1  -5  14 191.721 21.8225  25
  -1  -5  14 160.819 18.4979  29
  -1  -5  14 197.591 18.8971  18
  -1  -5  14 174.292 20.1087  35
  -1  -5  14 153.094 20.0200  23
  -1  -5  14 186.296 21.0480  27
  -1  -5  13 129.453 16.4311  23
  -1  -5  13 116.960 15.8040  34
  -1  -5  13 118.722 17.9184  25
  -1  -5  13 136.179 15.2567  18
  -1  -5  13 99.2191 14.5798  29
  -1  -5  13 113.995 16.5364  27
  -1  -5  13 118.965 15.9082  35
  -1  -5  12 416.464 35.2537   7
  -1  -5  12 434.793 32.0370  23
  -1  -5  12 359.583 31.7174  34
  -1  -5  12 355.001 32.1026  35
  -1  -5  12 383.662 33.8206  25
  -1  -5  12 432.565 31.0741  18
  -1  -5  11 137.893 13.9740  18
  -1  -5  11 118.392 15.6496  27
  -1  -5  11 132.952 17.3120  25
  -1  -5  11 107.380 14.7382  35
  -1  -5  11 141.429 15.3631  34
  -1  -5  11 146.184 19.2010   7
  -1  -5  11 140.969 14.9644  23
   1   5 -11 71.1014 21.0914   2
   1   5 -10 63.1154 20.3271   2
  -1  -5  10 138.415 18.0885   7
   1   5 -10 91.5452 25.5800   4
  -1  -5  10 117.196 14.0459  27
  -1  -5  10 113.386 13.1524  23
   1   5  -9 27.6401 18.6190   3
  -1  -5   9 10.2966 4.65154   5
   1   5  -9 35.0696 20.2197   4
   1   5  -9 30.5852 16.8263   1
  -1  -5   9 35.7397 18.9750   3
   1   5  -9 5.04480 14.9600   2
   1   5  -8 87.2867 19.6408   2
  -1  -5   8 73.8649 20.9927   3
   1   5  -8 73.3345 20.3253   4
   1   5  -8 95.6467 19.4748   1
  -1  -5   8 65.7633 11.3127   5
   1   5  -8 82.9949 19.6915   3
  -1  -5   8 84.5608 10.2938   6
   1   5  -7 3228.42 237.847   4
  -1  -5   7 3534.46 237.881   3
   1   5  -7 3504.75 237.045   3
   1   5  -7 3077.84 236.027   2
   1   5  -7 3480.18 235.260   1
  -1  -5   7 3385.81 236.230   1
  -1  -5   7 3468.41 229.614   6
  -1  -5   6 36.5649 9.74638   6
  -1  -5   6 14.7781 15.0700   1
   1   5  -6 17.3894 16.0051   3
   1   5  -6 11.7082 14.8820   4
  -1  -5   6 7.66664 13.7621   3
   1   5  -6 9.45012 15.1051   2
   1   5  -6 25.3036 14.1503   1
   1   5  -5 110.169 19.5309   4
   1   5  -5 86.4737 18.3108   2
   1   5  -5 81.8057 17.2042   3
   1   5  -5 79.6986 15.4528   1
  -1  -5   5 68.4957 16.5932   1
  -1  -5   5 98.8862 12.4105   6
   1   5  -4 134.524 19.9980   2
  -1  -5   4 120.248 13.8461   6
   1   5  -4 134.171 20.9710   4
   1   5  -4 145.827 19.5506   3
  -1  -5   4 106.710 16.3059   1
   1   5  -3 1134.62 83.9103   4
  -1  -5   3 1178.88 81.6747   1
   1   5  -3 1095.61 82.1438   3
  -1  -5   3 1122.97 79.6101   6
  -1  -5   2 5457.65 353.296   6
   1   5  -2 5206.08 354.876   3
   1   5  -2 5087.68 356.272   4
  -1  -5   2 5184.09 354.069   1
   1   5  -1 16876.7 1106.15   4
  -1  -5   1 16417.9 1103.07   6
  -1  -5   1 16587.5 1103.62   1
   1   5  -1 16473.0 1104.34   3
  -1  -5   0 102.797 13.3276   1
   1   5   0 80.1432 12.5883   1
   1   5   0 109.103 17.1158   4
   1   5   0 71.9163 13.6251   3
   1   5   1 523.822 41.6018   4
   1   5   1 509.964 39.2312   3
   1   5   1 485.739 38.1937   1
  -1  -5  -1 475.496 37.3880   6
  -1  -5  -1 503.660 37.7546   1
  -1  -5  -2 2612.22 185.108   4
  -1  -5  -2 2676.47 181.918   6
  -1  -5  -2 2696.45 182.145   1
   1   5   2 2582.84 182.379   1
   1   5   2 2565.03 182.980   3
   1   5   2 2831.39 185.786   4
  -1  -5  -2 2807.21 182.217   2
  -1  -5  -3 3193.81 211.721   2
  -1  -5  -3 3126.84 210.918   6
   1   5   3 2945.27 211.451   2
   1   5   3 3266.50 215.374   4
   1   5   4 14516.0 983.769   2
   1   5   4 15088.4 987.116   4
   1   5   5 3190.72 204.152   2
   1   5   5 2876.95 206.500   4
   1   5   5 2870.23 200.910   6
   1   5   6 23217.0 1472.15   2
   1   5   6 21670.1 1468.28   6
   1   5   6 21456.4 1474.84   4
   1   5   7 19.4507 16.6434   4
   1   5   7 7.79903 8.28878   6
  -1  -5  -7 18.3124 10.2207   5
   1   5   7 17.1619 15.0355   2
  -1  -5  -8 58.8252 18.1793   4
  -1  -5  -8 86.9390 13.4057   5
   1   5   8 75.8295 12.1984   6
   1   5   8 51.5845 19.5088   2
  -1  -5  -8 35.8718 16.2030   2
  -1  -5  -9 2590.87 196.465   4
   1   5   9 2682.73 194.131   2
  -1  -5  -9 2848.02 188.778   5
   1   5  10 35.0435 19.4644   2
  -1  -5 -10 22.9645 12.7508   5
  -1  -5 -10 34.3866 16.9083   3
  -1  -5 -10 27.9762 20.9118   4
  -1  -5 -11 1937.41 142.285   5
   1   5  11 2050.74 150.938   2
  -1  -5 -11 2289.98 150.401   2
  -1  -5 -11 2000.96 154.212   4
   1   5  12 274.343 36.4252   2
  -1  -5 -12 376.172 38.7007   3
  -1  -5 -12 274.074 41.0457   4
  -1  -5 -12 338.927 36.6084   2
  -1  -5 -13 771.501 71.5323   2
   1   5  13 878.112 61.1452  35
   1   5  13 796.692 61.2078  27
   1   5  13 979.279 65.1835   7
   1   5  14 133.094 17.4067  27
   1   5  14 175.211 17.0689  35
  -1  -5 -14 142.229 17.2934  21
   1   5  15 16.0274 10.9340  35
   1   5  15 20.3090 17.5769   7
  -1  -5 -15 4.36292 11.2063  21
   1   5  16 1804.48 129.147  35
  -1  -5 -16 1747.83 129.148  21
   1   5  17 109.547 21.2139   7
   1   5  17 80.8877 15.9416  35
  -1  -5 -17 75.4044 15.9530  21
  -1  -5 -18 90.1881 17.7709  21
   1   5  18 76.3306 16.8751  35
  -1  -5 -19 28.5036 16.0384  21
   1   5  19 83.6042 23.3227   7
   1   5  19 41.3573 16.3887  35
   1   5  20 30.2673 15.0864  35
  -1  -5 -20 30.1175 16.1860  21
   1   5  20 43.8975 21.1400   7
   1   5  21 3.25630 14.9043  35
   1   5  21-0.92173 19.5153   7
  -1  -5 -21-6.83020 14.8090  21
   1   5  22-2.60367 14.0219  35
   1   5  22-0.89602 20.0526   7
  -1  -5 -22 9.58989 14.6834  21
   1   5  23 2.58676 20.1167   7
  -1  -5 -23 14.7060 14.1305  21
   1   5  23 18.2296 13.2053  35
  -1  -5 -24 107.151 15.6150  21
   1   5  24 100.172 15.1375  35
  -1  -5 -25-2.18103 10.1355  21
   1   5  25 24.0030 9.50505  35
   1   5  25 9.62900 8.14671  13
   1   5  26 12.7260 5.29290  13
  -1  -5 -26 5.45535 7.59927  21
   1   5  26 13.1501 6.87454  35
  -1  -6  22 5.28407 9.09667  27
   1   6 -22-0.56056 10.5387  21
  -1  -6  21 19.7863 10.8462  11
  -1  -6  21 18.5670 8.92908  35
  -1  -6  21 0.63426 11.4387  27
  -1  -6  20-0.95336 11.8809  11
  -1  -6  20 5.01648 10.8153  35
  -1  -6  20 5.36633 13.0035  27
  -1  -6  19-8.30261 15.3498  27
  -1  -6  19 6.60438 13.5141  11
  -1  -6  19-5.57104 12.5673  35
  -1  -6  18 144.623 21.4855  27
  -1  -6  18 155.078 20.1729  35
  -1  -6  18 190.033 20.9477  11
  -1  -6  17-3.46043 15.4173  27
  -1  -6  17 7.14002 13.5033  35
  -1  -6  17 3.72790 16.7839   7
  -1  -6  17 5.06528 14.1736  11
  -1  -6  16 17.6063 14.3295  35
  -1  -6  16 20.8912 16.0362  27
  -1  -6  16-0.74467 17.4080   7
  -1  -6  16 14.3629 13.9215  25
  -1  -6  16 18.7879 10.9698  18
  -1  -6  15-3.45650 10.8433  18
  -1  -6  15-5.97369 14.4246  25
  -1  -6  15-3.56918 10.7020  29
  -1  -6  15 0.48426 13.3116  35
  -1  -6  15 0.71684 17.2205   7
  -1  -6  15-30.3428 15.9615  23
  -1  -6  15-5.84030 13.7607  27
  -1  -6  14 47.8656 13.6087  35
  -1  -6  14 36.4395 15.2523  25
  -1  -6  14 26.7361 10.7640  18
  -1  -6  14 57.9030 17.0503   7
  -1  -6  14 43.6566 14.5406  27
  -1  -6  14 21.1490 11.3419  29
[truncated: 11,564,138 more chars]
